# Supplementary material
Source: MDPI journal article supplement (https://www.mdpi.com/2076-3263/10/8/298)
Supplement: s2 [file s2]

## Sheet: MUNI_SIZs_Buffer_Network
																					SASMU (ENSI)												SASMU (ECSI)												SASMU (SOSI)
																					Original data					Normalized data							Original data					Normalized data							Original data
																					EN02 CHANGE IN ARTIFICIAL AREA	EN09 INDEX OF BURNT FOREST AREA	EN10 PROTECTED AREA	EN14 HABITAT'S FRAGMENTATION INDEX	EN23 SOIL EROSION	EN02 CHANGE IN ARTIFICIAL AREA	EN09 INDEX OF BURNT FOREST AREA	EN10 PROTECTED AREA	EN14 HABITAT'S FRAGMENTATION INDEX	EN23 SOIL EROSION	ENSI	Z_ENSI	EC01 ATMOSPHERIC CARBON FIXATION SERVICES	EC02 PRODUCTIVE SERVICES FOR LIVESTOCK	EC06 VALUE OF RECREATIONAL SERVICES	EC06 UNEMPLOYMENT RATE	EC07 PUBLIC MUNICIPAL DEBT	EC01 ATMOSPHERIC CARBON FIXATION SERVICES	EC02 PRODUCTIVE SERVICES FOR LIVESTOCK	EC06 VALUE OF RECREATIONAL SERVICES	EC06 UNEMPLOYMENT RATE	EC07 PUBLIC MUNICIPAL DEBT	ECSI	Z_ECSI	SO01 POPULATION DENSITY	SO03 SECOND HOMES	SO04 SENILE DEPENDENCY INDEX	SO05 MEDICAL FACILITIES INDEX	SO06 INDEX OF EDUCATIONAL FACILITIES
											Target Value (TV)										100	99.8	17	2	100	1	1	1	1	1			9616	283	1.326 / 299.200	96	100	1	1	1	1	1			0.38	26.7	71	0.24	0.547
LOCATION	MUNICIPALITY NAME	MUNI_CODE	NATIONAL PARK NAME	NOMBRE_INE	INSPIREID	NATLEVEL	NATCODE	CODNUT1	CODNUT2	CODNUT3	Sup_Muni_Ha	clc90_cod1_Ha	clc90_cod2_Ha	clc90_cod3_Ha	clc90_cod5_Ha	clc06_cod1_Ha	clc06_cod2_Ha	clc06_cod3_Ha	clc06_cod5_Ha		CAL	IBFA	PA	HFI_2018	SERO	CAL	IBFA	PA	HFI_2018	SERO			ACFS	PSL	VRS	UR	PMD	ACFS	PSL	VRS	UR	PMD	ECSI	Z_ECSI	PD	SH	SDI	MFI	IEF
01-SIZ	Abla	04001	Sierra Nevada NP	Abla	ES.IGN.SIGLIM.34010404001	4	34010404001	ES6	ES61	ES611	4520.87										99.9348	99.9445	36.0527	1.98166	89.7664	0.999348	1.00145	2.12075	0.990832	0.897664	20.2007	-0.019878	3911.12	138.269	58.9268	71.91	71.6373	0.40673	0.488584	0.0444395	0.749062	0.716373	-51.8962	-0.3171	0.161729	21.75	36	1.57853	2.3678
01-SIZ	Abrucena	04002	Sierra Nevada NP	Abrucena	ES.IGN.SIGLIM.34010404002	4	34010404002	ES6	ES61	ES611	8361.08										99.9721	99.9975	80.8309	1.9899	63.1694	0.999721	1.00198	4.75476	0.994952	0.631694	67.6621	1.15155	6538.57	104.577	129.156	74.25	97.8544	0.679968	0.36953	0.0974026	0.773438	0.978544	-42.0224	-0.285346	0.114852	21.44	38	0.0854701	0.854701
01-SIZ	Alboloduy	04005	Sierra Nevada NP	Alboloduy	ES.IGN.SIGLIM.34010404005	4	34010404005	ES6	ES61	ES611	6968.07										100	99.9387	52.861	1.99574	91.4448	1	1.00139	3.10947	0.99787	0.914448	40.4636	0.480246	2109.89	143.593	77.5916	71.65	100	0.219415	0.507396	0.0585156	0.746354	1	-49.3664	-0.308964	0.0891848	4.97	36	0.163934	3.27869
01-SIZ	Alsodux	04015	Sierra Nevada NP	Alsodux	ES.IGN.SIGLIM.34010404015	4	34010404015	ES6	ES61	ES611	2008.69										100	100	74.1715	1.99774	85.8075	1	1.002	4.36303	0.99887	0.858075	64.4396	1.07202	1037.48	98.3891	58.3915	88.57	99.6591	0.107891	0.347665	0.0440359	0.922604	0.996591	-51.6243	-0.316225	0.077726	28.26	4	0.757576	0
01-SIZ	Bayárcal	04020	Sierra Nevada NP	Bayárcal	ES.IGN.SIGLIM.34010404020	4	34010404020	ES6	ES61	ES611	3799.21										100	99.9995	75.1931	1.99819	83.7125	1	1.002	4.42312	0.999094	0.837125	65.2268	1.09145	6970.51	127.79	2618.81	75.81	86.2488	0.724886	0.451554	1.97497	0.789687	0.862488	-3.9283	-0.162837	0.0894329	28.76	30	0.330033	3.30033
01-SIZ	Beires	04023	Sierra Nevada NP	Beires	ES.IGN.SIGLIM.34010404023	4	34010404023	ES6	ES61	ES611	3880.41										100	99.8999	99.7073	1.98777	88.8411	1	1.001	5.86513	0.993884	0.888411	94.9686	1.82553	5541.64	140.578	143.754	59.52	97.9036	0.576293	0.496743	0.108412	0.62	0.979036	-44.3903	-0.292961	0.0486346	27.66	-31	0.909091	0
01-SIZ	Canjáyar	04030	Sierra Nevada NP	Canjáyar	ES.IGN.SIGLIM.34010404030	4	34010404030	ES6	ES61	ES611	6687.4										99.9888	99.4788	94.8151	1.99446	70.6867	0.999888	0.996781	5.57736	0.997228	0.706867	85.5625	1.59337	2387.49	238.558	51.7291	80.76	94.277	0.248284	0.842962	0.0390114	0.84125	0.94277	-41.7145	-0.284356	0.132385	11.1	26	0.0817661	2.45298
01-SIZ	Fiñana	04045	Sierra Nevada NP	Fiñana	ES.IGN.SIGLIM.34010404045	4	34010404045	ES6	ES61	ES611	13385.3										99.9878	99.9658	36.0328	1.99498	86.2703	0.999878	1.00166	2.11958	0.997492	0.862703	19.6263	-0.0340568	5868.63	82.5882	711.086	86.5	90.7053	0.610298	0.291831	0.536264	0.901042	0.907053	-35.0702	-0.262988	0.120726	12.8	46	0.0496524	2.48262
01-SIZ	Fondón	04046	Sierra Nevada NP	Fondón	ES.IGN.SIGLIM.34010404046	4	34010404046	ES6	ES61	ES611	9108.82										99.9881	99.9715	85.4456	1.99228	89.6538	0.999881	1.00172	5.02621	0.996138	0.896538	78.4097	1.41683	6064.51	156.028	1000.18	87.5	89.8863	0.630669	0.551337	0.754286	0.911458	0.898863	-25.0678	-0.230821	0.0940441	43.21	26	0.299401	1.99601
01-SIZ	Láujar de Andarax	04057	Sierra Nevada NP	Láujar de Andarax	ES.IGN.SIGLIM.34010404057	4	34010404057	ES6	ES61	ES611	9273.54										99.9839	99.9832	80.3482	1.98162	89.2388	0.999839	1.00184	4.72636	0.990808	0.892388	72.2246	1.26417	7480.75	136.872	2401.45	85.16	100	0.777949	0.483647	1.81105	0.887083	1	-0.805386	-0.152794	0.123783	34.05	50	0.0652316	2.60926
01-SIZ	Nacimiento	04065	Sierra Nevada NP	Nacimiento	ES.IGN.SIGLIM.34010404065	4	34010404065	ES6	ES61	ES611	8069.53										100	99.9049	24.2348	1.99874	98.2578	1	1.00105	1.42557	0.999368	0.982578	8.17143	-0.316783	2643.32	170.486	36.7558	88.59	100	0.274888	0.602424	0.0277193	0.922813	1	-43.4431	-0.289915	0.0716531	37.05	-8	0.210526	4.21053
01-SIZ	Ohanes	04067	Sierra Nevada NP	Ohanes	ES.IGN.SIGLIM.34010404067	4	34010404067	ES6	ES61	ES611	3238.76										100	99.8652	100	1.99519	79.384	1	1.00065	5.88235	0.997594	0.79384	93.4888	1.78901	6430.1	91.7664	165.994	70.31	90.0178	0.668688	0.324263	0.125184	0.732396	0.900178	-44.9858	-0.294876	0.133176	21.29	23	0.159744	3.19489
01-SIZ	Paterna del Río	04073	Sierra Nevada NP	Paterna del Río	ES.IGN.SIGLIM.34010404073	4	34010404073	ES6	ES61	ES611	4544.49										99.9996	99.881	84.7686	1.9942	66.9175	0.999996	1.00081	4.98639	0.997102	0.669175	73.0694	1.28502	6187.3	170.918	1545.91	75.78	73.387	0.643438	0.603951	1.16585	0.789375	0.73387	-21.2704	-0.218609	0.0876714	12.8	20	0.274725	2.74725
01-SIZ	Rágol	04077	Sierra Nevada NP	Rágol	ES.IGN.SIGLIM.34010404077	4	34010404077	ES6	ES61	ES611	2690.09										100	99.6837	92.0493	1.99829	59.8337	1	0.998835	5.41466	0.999143	0.598337	80.2196	1.4615	2469.34	150.654	41.0432	89.19	22.2135	0.256795	0.532348	0.0309526	0.929063	0.222135	-60.5741	-0.345008	0.104137	1.4	41	0.325733	0
01-SIZ	Las Tres Villas	04901	Sierra Nevada NP	Las Tres Villas	ES.IGN.SIGLIM.34010404901	4	34010404901	ES6	ES61	ES611	8528.73										100	99.947	29.9262	1.99789	97.3398	1	1.00147	1.76036	0.998947	0.973398	14.6836	-0.156051	4154.1	196.858	43.9063	72.65	100	0.431999	0.695612	0.0331119	0.756771	1	-41.6501	-0.284149	0.07929	21.23	12	0.501672	0
01-SIZ	Palma de Mallorca	07040	Cabrera NP	Palma de Mallorca	ES.IGN.SIGLIM.34040707040	4	34040707040	ES5	ES53	ES532	20985.3										99.497	99.901	13.3046	1.57953	86.9444	0.99497	1.00101	0.782626	0.789763	0.869444	-11.2437	-0.795984	2318.01	67.3465	72467.2	88.51	21.6603	0.241058	0.237973	0.242203	0.921979	0.216603	-62.8037	-0.352178	0.465042	7.37	69	0.391398	0.447733
01-SIZ	Ses Salines	07059	Cabrera NP	Ses Salines	ES.IGN.SIGLIM.34040707059	4	34040707059	ES5	ES53	ES532	3933.01										99.9038	99.9964	38.1853	1.92801	100	0.999038	1.00197	2.24619	0.964003	1	24.2241	0.0794249	2685.98	77.2143	10996	75.03	64.4999	0.279324	0.272842	8.29262	0.781563	0.644999	105.427	0.188844	0.31334	44.94	60	0.0411523	0.205761
01-SIZ	Casas de Millán	10056	Monfragüe NP	Casas de Millán	ES.IGN.SIGLIM.34111010056	4	34111010056	ES4	ES43	ES432	15308.3										99.9578	99.1387	27.3539	1.98795	94.0875	0.999578	0.993374	1.60906	0.993974	0.940875	10.7371	-0.253458	1509.16	811.962	138.93	73.23	71.5205	0.156942	2.86912	0.104773	0.762813	0.715205	-7.82287	-0.175362	0.0596877	43	16	0.165017	1.65017
01-SIZ	Casas de Miravete	10057	Monfragüe NP	Casas de Miravete	ES.IGN.SIGLIM.34111010057	4	34111010057	ES4	ES43	ES432	5018.67										99.9829	99.9607	100.094	1.98521	100	0.999829	1.00161	5.88791	0.992607	1	97.6391	1.89144	9288.52	90.3085	665.05	57.89	19.1054	0.965944	0.319111	0.501546	0.603021	0.191054	-48.3865	-0.305813	0.0530948	9.97	-17	0.675676	0
01-SIZ	Casatejada	10058	Monfragüe NP	Casatejada	ES.IGN.SIGLIM.34111010058	4	34111010058	ES4	ES43	ES432	11187.8										99.8726	99.0091	8.24324	1.97106	100	0.998726	0.992075	0.484896	0.985529	1	-10.7755	-0.784427	1764.73	121.991	27.3577	61.95	100	0.18352	0.431064	0.0206317	0.645313	1	-54.3894	-0.325118	0.10306	55.94	50	0.0709723	0.709723
01-SIZ	Deleitosa	10070	Monfragüe NP	Deleitosa	ES.IGN.SIGLIM.34111010070	4	34111010070	ES4	ES43	ES432	14427.9										99.9979	99.9917	10.3181	1.9954	93.2506	0.999979	1.00192	0.606944	0.997702	0.932506	-9.21896	-0.74601	4721.32	198.886	137.115	90.81	100	0.490986	0.702779	0.103405	0.945937	1	-35.1379	-0.263206	0.0675028	45.27	4	0.13369	1.3369
01-SIZ	Higuera	10097	Monfragüe NP	Higuera	ES.IGN.SIGLIM.34111010097	4	34111010097	ES4	ES43	ES432	4055.49										100	99.8469	48.3425	1.99279	90.8083	1	1.00047	2.84368	0.996395	0.908083	34.9725	0.344716	7602.37	223.186	107.897	87.1	100	0.790596	0.788644	0.0813701	0.907292	1	-28.6419	-0.242315	0.0466792	57.76	-34	1.0101	0
01-SIZ	Jaraicejo	10103	Monfragüe NP	Jaraicejo	ES.IGN.SIGLIM.34111010103	4	34111010103	ES4	ES43	ES432	17759.5										99.9825	99.815	82.4531	1.9889	98.9327	0.999825	1.00015	4.85018	0.994448	0.989327	76.6786	1.3741	2970.58	797.828	357.839	65.18	83.3515	0.30892	2.81918	0.269863	0.678958	0.833515	-1.79129	-0.155965	0.0500929	53.83	17	0.201207	0
01-SIZ	Malpartida de Plasencia	10116	Monfragüe NP	Malpartida de Plasencia	ES.IGN.SIGLIM.34111010116	4	34111010116	ES4	ES43	ES432	37296.9										99.9523	99.5876	45.8007	1.98979	99.9746	0.999523	0.997872	2.69416	0.994896	0.999746	33.7239	0.313897	2530.56	951.721	79.2732	88.79	99.7124	0.263161	3.36297	0.0597837	0.924896	0.997124	12.1588	-0.111102	0.104335	18.42	59	0.0216967	0.867867
01-SIZ	Mirabel	10123	Monfragüe NP	Mirabel	ES.IGN.SIGLIM.34111010123	4	34111010123	ES4	ES43	ES432	4935.25										99.9453	99.9685	48.4915	1.98685	91.2422	0.999453	1.00169	2.85244	0.993426	0.912422	35.1886	0.35005	4807.92	1413.23	55.0966	74.22	100	0.499991	4.99376	0.041551	0.773125	1	46.1686	-0.00172832	0.106923	48.19	23	0.149477	1.49477
01-SIZ	Romangordo	10160	Monfragüe NP	Romangordo	ES.IGN.SIGLIM.34111010160	4	34111010160	ES4	ES43	ES432	3908.64										99.9883	99.229	23.4335	1.9396	100	0.999883	0.994278	1.37844	0.969799	1	6.84807	-0.349446	4804.56	163.612	89.8016	91.67	100	0.499642	0.578135	0.0677237	0.954896	1	-37.9921	-0.272385	0.0728204	46.94	-53	0.401606	0
01-SIZ	Saucedilla	10173	Monfragüe NP	Saucedilla	ES.IGN.SIGLIM.34111010173	4	34111010173	ES4	ES43	ES432	6044.44										99.9227	95.0893	16.6424	1.97185	100	0.999227	0.952799	0.978967	0.985925	1	-1.66165	-0.559482	401.74	201.242	28.6018	72.61	100	0.0417783	0.711101	0.02157	0.756354	1	-49.3839	-0.30902	0.1075	0	61	0.112867	1.12867
01-SIZ	Serradilla	10175	Monfragüe NP	Serradilla	ES.IGN.SIGLIM.34111010175	4	34111010175	ES4	ES43	ES432	25942.8										99.9968	99.8266	99.8216	1.99783	90.3261	0.999968	1.00027	5.87186	0.998917	0.903261	95.4854	1.83829	4876.99	401.841	439.857	68.88	99.7098	0.507175	1.41993	0.331718	0.7175	0.997098	-20.5315	-0.216233	0.0731844	49.89	31	1.24378	1.24378
01-SIZ	Serrejón	10176	Monfragüe NP	Serrejón	ES.IGN.SIGLIM.34111010176	4	34111010176	ES4	ES43	ES432	12423.1										100	99.9639	91.4832	1.99793	99.0912	1	1.00164	5.38137	0.998965	0.990912	87.4577	1.64015	4221.96	393.459	563.051	75.49	100	0.439056	1.39031	0.424624	0.786354	1	-19.193	-0.211928	0.0538282	0.36	40	0.230947	0
01-SIZ	Toril	10182	Monfragüe NP	Toril	ES.IGN.SIGLIM.34111010182	4	34111010182	ES4	ES43	ES432	14986										99.9418	99.9341	68.3973	1.9904	100	0.999418	1.00134	4.02337	0.995202	1	60.3866	0.971983	2501.94	191.973	324.646	65.74	100	0.260186	0.678348	0.244831	0.684792	1	-42.6369	-0.287322	0.0305598	0.78	83	0.588235	0
01-SIZ	Torrejón el Rubio	10190	Monfragüe NP	Torrejón el Rubio	ES.IGN.SIGLIM.34111010190	4	34111010190	ES4	ES43	ES432	22205.9										99.9929	99.8898	99.9739	1.99802	98.0392	0.999929	1.0009	5.88082	0.999009	0.980392	97.2209	1.88112	2999.81	166.222	360.035	78.31	92.6464	0.31196	0.587358	0.27152	0.815729	0.926464	-41.7394	-0.284436	0.0466904	33.33	33	0.168634	1.68634
01-SIZ	Alcoba	13006	Cabañeros NP	Alcoba	ES.IGN.SIGLIM.34081313006	4	34081313006	ES4	ES42	ES422	30695.9										99.999	99.8251	54.2532	1.99762	98.1833	0.99999	1.00025	3.19136	0.99881	0.981833	43.4449	0.553831	2887.11	8.5404	78.7245	88.56	29.6111	0.30024	0.0301781	0.0593699	0.9225	0.296111	-67.832	-0.368349	0.0440601	28.8	16	3.27869	1.63934
01-SIZ	Daimiel	13039	Tablas de Daimiel NP	Daimiel	ES.IGN.SIGLIM.34081313039	4	34081313039	ES4	ES42	ES422	43797.8										99.9508	37.0264	4.31164	1.97514	100	0.999508	0.371006	0.253626	0.987572	1	-27.7658	-1.20378	49.8103	2.85659	961.958	86.98	30.6998	0.00517994	0.010094	0.725458	0.906042	0.306998	-60.9246	-0.346135	0.0427946	7.9	55	0.22007	0.660211
01-SIZ	Horcajo de los Montes	13049	Cabañeros NP	Horcajo de los Montes	ES.IGN.SIGLIM.34081313049	4	34081313049	ES4	ES42	ES422	20836.9										99.9968	99.9854	34.6451	1.99701	90.1549	0.999968	1.00186	2.03795	0.998503	0.901549	18.7965	-0.0545372	4831.66	45.1849	53.3675	83.33	100	0.502461	0.159664	0.040247	0.868021	1	-48.5922	-0.306474	0.0633501	17.77	30	0.106952	2.13904
01-SIZ	Navas de Estena	13060	Cabañeros NP	Navas de Estena	ES.IGN.SIGLIM.34081313060	4	34081313060	ES4	ES42	ES422	14648.5										99.9937	99.6868	73.9708	1.99741	100	0.999937	0.998866	4.35122	0.998704	1	66.9746	1.13459	7855.54	26.0418	103.71	84.68	100	0.816923	0.0920205	0.078213	0.882083	1	-42.6152	-0.287253	0.04174	30.4	-4	0.406504	0
01-SIZ	Retuerta del Bullaque	13072	Cabañeros NP	Retuerta del Bullaque	ES.IGN.SIGLIM.34081313072	4	34081313072	ES4	ES42	ES422	65356.4										99.9934	99.9662	43.4618	1.9981	96.8407	0.999934	1.00167	2.55658	0.999051	0.968407	30.5127	0.234639	3729.71	82.9721	154.263	88.86	100	0.387865	0.293188	0.116337	0.925625	1	-45.5397	-0.296658	0.0369774	41.04	38	2.11907	1.00908
01-SIZ	Torralba de Calatrava	13083	Tablas de Daimiel NP	Torralba de Calatrava	ES.IGN.SIGLIM.34081313083	4	34081313083	ES4	ES42	ES422	10151.3										99.9541	99.8936	0	1.96412	100	0.999541	1.00094	0	0.98206	1	-20.3492	-1.02073	91.6018	1.01508	834.704	88.82	-13.686	0.00952598	0.00358684	0.62949	0.925208	-0.13686	-71.381	-0.379762	0.159798	29.71	34	0.0332668	0.998004
01-SIZ	Villarrubia de los Ojos	13096	Tablas de Daimiel NP	Villarrubia de los Ojos	ES.IGN.SIGLIM.34081313096	4	34081313096	ES4	ES42	ES422	28164.8										99.9957	99.7233	31.2431	1.98902	100	0.999957	0.999231	1.83783	0.994508	1	16.6305	-0.107999	1757.72	20.1952	340.111	85.81	55.7801	0.182791	0.0713611	0.256494	0.893854	0.557801	-60.754	-0.345586	0.183638	9.61	55	0.199481	0.598444
01-SIZ	Ribeira	15073	Islas Atlánticas de Galicia NP	Ribeira	ES.IGN.SIGLIM.34121515073	4	34121515073	ES1	ES11	ES111	6833.37										99.7243	96.8159	19.4866	1.88366	95.4613	0.997243	0.970099	1.14627	0.941829	0.954613	0.201134	-0.513505	20379.7	46.2165	135842	90.31	76.7737	2.11935	0.163309	0.454017	0.940729	0.767737	-11.0971	-0.185892	0.492436	19.91	62	0.662764	0
01-SIZ	Aldeire	18010	Sierra Nevada NP	Aldeire	ES.IGN.SIGLIM.34011818010	4	34011818010	ES6	ES61	ES614	7001.51										99.4149	99.9997	59.7563	1.89761	79.3148	0.994149	1.002	3.51508	0.948807	0.793148	45.0636	0.593784	3478.48	51.5778	1746.37	58.87	44.7211	0.361739	0.182254	1.31702	0.613229	0.447211	-41.571	-0.283894	0.087881	47.33	18	0.15748	0
01-SIZ	Bérchules	18030	Sierra Nevada NP	Bérchules	ES.IGN.SIGLIM.34011818030	4	34011818030	ES6	ES61	ES614	6953.05										100	99.975	95.3802	1.99565	100	1	1.00175	5.6106	0.997825	1	92.2036	1.75728	3631.82	254.795	1127.14	68.09	66.1376	0.377685	0.900336	0.850027	0.709271	0.661376	-30.0261	-0.246767	0.097282	47.72	47	0.13986	2.7972
01-SIZ	Bubión	18032	Sierra Nevada NP	Bubión	ES.IGN.SIGLIM.34011818032	4	34011818032	ES6	ES61	ES614	1485.18										100	99.9989	100	1.9906	100	1	1.00199	5.88235	0.9953	1	97.5929	1.8903	3782.86	182.803	243.691	78.67	32.6983	0.393392	0.645947	0.183779	0.819479	0.326983	-52.6084	-0.31939	0.136775	30.8	68	0.332226	0
01-SIZ	Busquístar	18033	Sierra Nevada NP	Busquístar	ES.IGN.SIGLIM.34011818033	4	34011818033	ES6	ES61	ES614	1801.73										99.9205	99.8093	93.3477	1.97052	100	0.999205	1.00009	5.49104	0.98526	1	89.512	1.69085	6120.87	125.883	1760.37	64.43	100	0.63653	0.444817	1.32758	0.671146	1	-18.3986	-0.209373	0.121069	23.04	56	0.359712	0
01-SIZ	Cáñar	18040	Sierra Nevada NP	Cáñar	ES.IGN.SIGLIM.34011818040	4	34011818040	ES6	ES61	ES614	2632.54										100	99.9271	91.8633	1.99828	100	1	1.00127	5.40373	0.99914	1	88.0828	1.65557	2547.89	191.283	1735.22	55.86	100	0.264964	0.675913	1.30862	0.581875	1	-23.3727	-0.225369	0.113929	0.36	31	0.287356	0
01-SIZ	Capileira	18042	Sierra Nevada NP	Capileira	ES.IGN.SIGLIM.34011818042	4	34011818042	ES6	ES61	ES614	5685.01										99.9748	99.9957	100	1.99382	96.1611	0.999748	1.00196	5.88235	0.996908	0.961611	96.8516	1.87201	1300.06	342.808	276.127	81.22	100	0.135198	1.21134	0.208241	0.846042	1	-31.9837	-0.253062	0.0886946	14.91	60	0.178891	1.78891
01-SIZ	Dílar	18068	Sierra Nevada NP	Dílar	ES.IGN.SIGLIM.34011818068	4	34011818068	ES6	ES61	ES614	7921.91										99.9489	99.945	76.9504	1.97489	66.2966	0.999489	1.00145	4.52649	0.987443	0.662966	63.5568	1.05023	2918.92	83.7095	322.955	81.69	91.8789	0.303548	0.295793	0.243556	0.850938	0.918789	-47.7475	-0.303758	0.136988	0.38	55	0.0510465	2.04186
01-SIZ	Dólar	18069	Sierra Nevada NP	Dólar	ES.IGN.SIGLIM.34011818069	4	34011818069	ES6	ES61	ES614	7852.43										99.9921	100	50.3271	1.98835	91.1261	0.999921	1.002	2.96042	0.994177	0.911261	37.3557	0.403537	2934.32	50.3249	2173.51	68.75	98.1188	0.30515	0.177827	1.63914	0.716146	0.981188	-23.6109	-0.226136	0.0799014	15.31	13	0.15674	0
01-SIZ	Dúrcal	18071	Sierra Nevada NP	Dúrcal	ES.IGN.SIGLIM.34011818071	4	34011818071	ES6	ES61	ES614	7657.66										99.8763	99.9506	78.6946	1.96525	96.5355	0.998763	1.00151	4.62909	0.982623	0.965355	71.5469	1.24744	2617.04	336.154	359.07	83.16	42.2258	0.272155	1.18782	0.270792	0.86625	0.422258	-39.6144	-0.277602	0.276606	11.84	61	0.284576	0.853728
01-SIZ	Ferreira	18074	Sierra Nevada NP	Ferreira	ES.IGN.SIGLIM.34011818074	4	34011818074	ES6	ES61	ES614	4354.57										100	99.9998	40.9891	1.98604	94.3614	1	1.002	2.41112	0.993018	0.943614	26.9951	0.14782	2839.19	51.1374	2477.78	83.33	100	0.295257	0.180698	1.86861	0.868021	1	-15.7483	-0.20085	0.0805815	39.23	23	0.327869	3.27869
01-SIZ	Güejar Sierra	18094	Sierra Nevada NP	Güejar Sierra	ES.IGN.SIGLIM.34011818094	4	34011818094	ES6	ES61	ES614	23876.3										99.997	99.9569	52.2067	1.99553	42.6522	0.99997	1.00157	3.07098	0.997764	0.426522	29.9362	0.22041	1487.26	295.181	158.909	88.72	78.7782	0.154665	1.04304	0.119841	0.924167	0.787782	-39.41	-0.276945	0.102075	0.07	63	0.0347464	0.694927
01-SIZ	Huéneja	18097	Sierra Nevada NP	Huéneja	ES.IGN.SIGLIM.34011818097	4	34011818097	ES6	ES61	ES614	11664.8										99.9942	99.9856	21.8784	1.99502	87.3164	0.999942	1.00186	1.28696	0.99751	0.873164	3.18881	-0.439764	2127.46	55.2656	3092.14	67.35	100	0.221242	0.195285	2.33193	0.701562	1	-10.9996	-0.185578	0.092964	11.87	34	0.17301	0.865052
01-SIZ	Jerez del Marquesado	18108	Sierra Nevada NP	Jerez del Marquesado	ES.IGN.SIGLIM.34011818108	4	34011818108	ES6	ES61	ES614	8268.61										99.9884	99.9974	82.8628	1.99414	74.0759	0.999884	1.00198	4.87428	0.997072	0.740759	72.2795	1.26552	3851.19	78.8897	895.381	73.29	86.3198	0.400498	0.278762	0.675249	0.763437	0.863198	-40.3771	-0.280055	0.101851	40.21	25	0.0998004	0.998004
01-SIZ	Juviles	18112	Sierra Nevada NP	Juviles	ES.IGN.SIGLIM.34011818112	4	34011818112	ES6	ES61	ES614	1497.28										100	99.9961	80.0505	1.99418	100	1	1.00196	4.70885	0.997092	1	74.1582	1.31189	2806.21	1887.18	4168.48	67.8	100	0.291828	6.66847	3.14365	0.70625	1	136.204	0.287821	0.0920733	52.98	26	0.694444	0
01-SIZ	Lanjarón	18116	Sierra Nevada NP	Lanjarón	ES.IGN.SIGLIM.34011818116	4	34011818116	ES6	ES61	ES614	6033.48										99.9532	98.3462	52.9253	1.9751	71.7964	0.999532	0.985433	3.11326	0.987552	0.717964	36.0747	0.371921	1831.36	653.16	8209.77	80.59	5.34733	0.190449	2.30799	6.19138	0.839479	0.0534733	91.6554	0.144555	0.225651	26.31	47	0.028547	1.14188
01-SIZ	Lanteira	18117	Sierra Nevada NP	Lanteira	ES.IGN.SIGLIM.34011818117	4	34011818117	ES6	ES61	ES614	5273.63										99.948	99.9997	73.048	1.97216	79.8205	0.99948	1.002	4.29694	0.986082	0.798205	61.6541	1.00327	3315.49	78.699	1139.85	62.84	88.0844	0.344789	0.278088	0.859619	0.654583	0.880844	-39.6415	-0.277689	0.0956867	28.27	31	0.178891	1.78891
01-SIZ	Lecrín	18119	Sierra Nevada NP	Lecrín	ES.IGN.SIGLIM.34011818119	4	34011818119	ES6	ES61	ES614	4045.76										99.9067	97.4689	59.1049	1.95202	94.9644	0.999067	0.976642	3.47676	0.976008	0.949644	47.5624	0.655457	3927.05	89.0166	287.454	73.81	100	0.408387	0.314546	0.216783	0.768854	1	-45.8286	-0.297587	0.211634	18.2	35	0.239349	0
01-SIZ	Lugros	18123	Sierra Nevada NP	Lugros	ES.IGN.SIGLIM.34011818123	4	34011818123	ES6	ES61	ES614	6323.36										100	100	86.541	1.99822	94.2167	1	1.002	5.09065	0.99911	0.942167	80.6786	1.47283	2819.88	101.148	181.503	47.95	73.4682	0.293249	0.357414	0.13688	0.499479	0.734682	-59.5659	-0.341765	0.0660544	9.62	29	0.299401	0
01-SIZ	Monachil	18134	Sierra Nevada NP	Monachil	ES.IGN.SIGLIM.34011818134	4	34011818134	ES6	ES61	ES614	8884.97										99.9763	99.9591	82.1206	1.96497	64.281	0.999763	1.00159	4.83062	0.982487	0.64281	69.1455	1.18817	3875.7	100.597	197.581	81.01	41.513	0.403047	0.355465	0.149006	0.843854	0.41513	-56.67	-0.332452	0.261397	37.44	74	0.0388853	0.518471
01-SIZ	Nigüelas	18143	Sierra Nevada NP	Nigüelas	ES.IGN.SIGLIM.34011818143	4	34011818143	ES6	ES61	ES614	3090.18										99.8224	97.8111	80.9564	1.96863	99.5258	0.998224	0.980071	4.76214	0.984315	0.995258	74.4002	1.31786	2750.64	943.023	153.415	68.39	99.8167	0.286048	3.33224	0.115697	0.712396	0.998167	8.89087	-0.121612	0.175672	14.8	30	0.083682	1.67364
01-SIZ	Pampaneira	18151	Sierra Nevada NP	Pampaneira	ES.IGN.SIGLIM.34011818151	4	34011818151	ES6	ES61	ES614	1745.79										100	99.9671	99.6846	1.99686	92.7289	1	1.00167	5.8638	0.998429	0.927289	95.8239	1.84664	6037.9	225.617	698.424	72.58	30.2905	0.627901	0.797233	0.526715	0.756042	0.302905	-39.7841	-0.278148	0.128481	0.83	61	0.308642	3.08642
01-SIZ	Pórtugos	18163	Sierra Nevada NP	Pórtugos	ES.IGN.SIGLIM.34011818163	4	34011818163	ES6	ES61	ES614	2081.13										100	99.9995	87.382	1.99638	99.6787	1	1.002	5.14012	0.998192	0.996787	82.7419	1.52375	3594.82	225.375	2561.75	68.28	82.6726	0.373838	0.796379	1.93194	0.71125	0.826726	-7.19743	-0.173351	0.122004	18.55	42	0.248139	2.48139
01-SIZ	Soportújar	18176	Sierra Nevada NP	Soportújar	ES.IGN.SIGLIM.34011818176	4	34011818176	ES6	ES61	ES614	1415.05										100	99.9939	70.1089	2	100	1	1.00194	4.12405	1	1	62.5199	1.02464	5423.54	375.562	5187.27	62.16	97.9575	0.564012	1.32707	3.91197	0.6475	0.979575	48.6026	0.00609925	0.125689	0	33	0.37594	0
01-SIZ	Trevélez	18180	Sierra Nevada NP	Trevélez	ES.IGN.SIGLIM.34011818180	4	34011818180	ES6	ES61	ES614	9088.85										99.9825	99.9971	100	1.99631	99.9349	0.999825	1.00198	5.88235	0.998154	0.999349	97.6331	1.89129	1380.5	450.441	300.975	75.52	91.5219	0.143563	1.59167	0.22698	0.786667	0.915219	-26.7181	-0.236128	0.0847943	2.95	53	0.131926	2.63852
01-SIZ	Válor	18183	Sierra Nevada NP	Válor	ES.IGN.SIGLIM.34011818183	4	34011818183	ES6	ES61	ES614	5851.81										100	99.8626	80.3193	1.99322	84.239	1	1.00063	4.72466	0.99661	0.84239	71.2858	1.24099	1850.03	131.697	3969.14	51.06	83.3894	0.192391	0.46536	2.99332	0.531875	0.833894	0.33674	-0.149121	0.0999751	55.97	14	0.443787	1.47929
01-SIZ	La Zubia	18193	Sierra Nevada NP	La Zubia	ES.IGN.SIGLIM.34011818193	4	34011818193	ES6	ES61	ES614	2009.45										99.664	99.994	57.0787	1.71315	71.3278	0.99664	1.00194	3.35757	0.856576	0.713278	38.5202	0.43228	1292.61	26.4848	175.896	87.4	84.8335	0.134423	0.093586	0.132652	0.910417	0.848335	-57.6118	-0.335481	0.475075	9.2	79	0.10523	0.63138
01-SIZ	La Taha	18901	Sierra Nevada NP	La Taha	ES.IGN.SIGLIM.34011818901	4	34011818901	ES6	ES61	ES614	2556.72										100	99.9758	25.3206	1.99406	78.6745	1	1.00176	1.48945	0.997032	0.786745	5.49976	-0.382725	3907.4	244.73	13495	62.59	-140.202	0.406343	0.864769	10.1773	0.651979	-1.40202	113.966	0.216306	0.154567	33.76	43	0.459418	0
01-SIZ	Nevada	18903	Sierra Nevada NP	Nevada	ES.IGN.SIGLIM.34011818903	4	34011818903	ES6	ES61	ES614	7725.23										100	99.9675	73.022	1.99542	83.3885	1	1.00168	4.29541	0.997711	0.833885	62.5737	1.02596	2406.37	108.349	5037.21	44.86	57.5492	0.250247	0.38286	3.7988	0.467292	0.575492	9.49391	-0.119672	0.110813	39.98	24	0.275482	0
01-SIZ	Alpujarra de la Sierra	18904	Sierra Nevada NP	Alpujarra de la Sierra	ES.IGN.SIGLIM.34011818904	4	34011818904	ES6	ES61	ES614	6847.9										100	99.9264	79.1138	1.99476	95.6911	1	1.00127	4.65375	0.997382	0.956911	72.1863	1.26322	2544.36	169.755	4106.12	34.43	68.9771	0.264597	0.599842	3.09662	0.358646	0.689771	0.189532	-0.149595	0.116373	14.51	34	0.195886	0
01-SIZ	Almonte	21005	Doñana NP	Almonte	ES.IGN.SIGLIM.34012121005	4	34012121005	ES6	ES61	ES615	86012										99.9809	99.8624	72.5124	1.98528	100	0.999809	1.00063	4.26543	0.992642	1	65.1702	1.09005	3102.37	76.4037	36797.7	74.82	-50.9901	0.322626	0.269978	0.122987	0.779375	-0.509901	-80.2987	-0.408441	0.15999	41.72	72	0.0945342	0.773462
01-SIZ	Hinojos	21040	Doñana NP	Hinojos	ES.IGN.SIGLIM.34012121040	4	34012121040	ES6	ES61	ES615	32033.7										99.9844	99.969	82.643	1.99371	100	0.999844	1.00169	4.86135	0.996854	1	77.1948	1.38684	2650.79	23.8018	100.122	75.51	83.7947	0.275664	0.0841055	0.075507	0.786563	0.837947	-58.8043	-0.339316	0.101875	2.34	64	0.0257003	1.02801
01-SIZ	Bielsa	22057	Ordesa y Monte Perdido NP	Bielsa	ES.IGN.SIGLIM.34022222057	4	34022222057	ES2	ES24	ES241	20259.9										100	100	84.5338	1.99856	100	1	1.002	4.97257	0.99928	1	79.4772	1.44317	6934.39	754.75	768.138	92.35	100	0.72113	2.66696	0.57929	0.961979	1	18.5872	-0.0904286	0.0445855	23.06	35	0.422833	2.11416
01-SIZ	Broto	22069	Ordesa y Monte Perdido NP	Broto	ES.IGN.SIGLIM.34022222069	4	34022222069	ES2	ES24	ES241	12812.1										99.9942	99.9942	18.0811	1.99373	95.6182	0.999942	1.00195	1.06359	0.996864	0.956182	0.370542	-0.509324	11714.3	1273.37	197.624	94.3	32.0029	1.21821	4.49953	0.149038	0.982292	0.320029	43.3818	-0.0106903	0.0582207	57.62	48	3.62319	3.62319
01-SIZ	Fanlo	22107	Ordesa y Monte Perdido NP	Fanlo	ES.IGN.SIGLIM.34022222107	4	34022222107	ES2	ES24	ES241	18719										100	99.9982	68.636	1.99904	100	1	1.00199	4.03741	0.999521	1	60.7784	0.981652	8812.53	1263.79	1323.75	93.07	100	0.916445	4.46568	0.998302	0.969479	1	66.9982	0.0652587	0.0224582	29.85	59	0	0
01-SIZ	Puértolas	22189	Ordesa y Monte Perdido NP	Puértolas	ES.IGN.SIGLIM.34022222189	4	34022222189	ES2	ES24	ES241	9994.58										100	99.9992	71.2484	1.99799	100	1	1.002	4.19108	0.998997	1	63.8415	1.05725	10261.5	1893.96	1106.57	88.51	-7.79723	1.06713	6.69244	0.834516	0.921979	-0.0779723	88.7619	0.13525	0.043067	33.09	41	0.47619	0
01-SIZ	Tella-Sin	22227	Ordesa y Monte Perdido NP	Tella-Sin	ES.IGN.SIGLIM.34022222227	4	34022222227	ES2	ES24	ES241	8958.64										100	99.9751	41.0085	1.99727	100	1	1.00175	2.41226	0.998637	1	28.2531	0.178869	9186.63	1167.77	707.553	97.89	8.96623	0.955348	4.12641	0.5336	1.01969	0.0896623	34.4941	-0.0392729	0.0483604	14.67	-2	9.09091	0
01-SIZ	Torla - Ordesa	22230	Ordesa y Monte Perdido NP	Torla - Ordesa		0					0										99.9873	99.9984	90.6186	1.99691	100	0.999873	1.00199	5.33051	0.998453	1	86.6164	1.61938	6341.78	2884.2	530.739	89.54	100	0.659503	10.1915	0.400256	0.932708	1	163.68	0.376181	0.0378764	49.07	45	0.334448	0
01-SIZ	Oseja de Sajambre	24106	Picos de Europa NP	Oseja de Sajambre	ES.IGN.SIGLIM.34072424106	4	34072424106	ES4	ES41	ES413	7330.47										100	99.9323	99.9999	1.99387	99.2457	1	1.00133	5.88235	0.996934	0.992457	97.4613	1.88705	20074.3	1374.38	1642.12	84	99.0238	2.08759	4.85646	1.2384	0.875	0.990238	100.954	0.174458	0.0593105	41.29	-14	1.5873	0
01-SIZ	Posada de Valdeón	24116	Picos de Europa NP	Posada de Valdeón	ES.IGN.SIGLIM.34072424116	4	34072424116	ES4	ES41	ES413	16447.1										100	99.8895	100	1.99643	100	1	1.0009	5.88235	0.998215	1	97.6293	1.8912	9969	2438.85	1668.09	89.33	100	1.03671	8.61785	1.25798	0.930521	1	156.861	0.354254	0.0384201	25.78	-8	0.663717	2.21239
01-SIZ	Alt Àneu	25024	Aigüestortes i Estany de Sant Maurici NP	Alt Àneu	ES.IGN.SIGLIM.34092525024	4	34092525024	ES5	ES51	ES513	21816.9										100	99.9661	79.6852	1.9988	100	1	1.00166	4.68737	0.999402	1	73.7687	1.30228	4023.45	1556.04	286.233	95.65	100	0.418412	5.49839	0.215862	0.996354	1	62.5803	0.0510509	0.039967	17.73	54	0.246914	0
01-SIZ	Naut Aran	25025	Aigüestortes i Estany de Sant Maurici NP	Naut Aran	ES.IGN.SIGLIM.34092525025	4	34092525025	ES5	ES51	ES513	25556.4										99.9693	99.8927	58.2678	1.98919	100	0.999693	1.00093	3.42752	0.994597	1	48.4547	0.677482	3232.83	2393.92	319.236	93.4	100	0.336193	8.45908	0.240751	0.972917	1	120.179	0.236285	0.074918	80.67	76	0.112296	0
01-SIZ	La Vall de Boí	25043	Aigüestortes i Estany de Sant Maurici NP	La Vall de Boí	ES.IGN.SIGLIM.34092525043	4	34092525043	ES5	ES51	ES513	22084.3										99.8875	99.9935	70.1307	1.98378	100	0.998875	1.00194	4.12534	0.991888	1	62.3607	1.02071	3623.33	1848	1131.66	95.37	57.7169	0.376802	6.53002	0.853439	0.993438	0.577169	86.6173	0.128353	0.062176	45.88	65	0.492611	0
01-SIZ	Espot	25082	Aigüestortes i Estany de Sant Maurici NP	Espot	ES.IGN.SIGLIM.34092525082	4	34092525082	ES5	ES51	ES513	9755.8										100	99.9916	77.1397	1.99797	100	1	1.00192	4.53763	0.998983	1	70.7707	1.22828	4587.93	566.193	1236.75	96.15	100	0.477114	2.00068	0.932696	1.00156	1	8.24111	-0.123701	0.0536777	37.7	62	0.273973	0
01-SIZ	Esterri d'Àneu	25086	Aigüestortes i Estany de Sant Maurici NP	Esterri d'Àneu	ES.IGN.SIGLIM.34092525086	4	34092525086	ES5	ES51	ES513	857.051										99.9142	99.9975	23.4188	1.95444	100	0.999142	1.00198	1.37758	0.97722	1	7.11839	-0.342774	5001.87	2836.67	326.568	95.75	99.9953	0.520161	10.0236	0.246281	0.997396	0.999953	155.747	0.350672	0.282994	61.99	56	0.130039	3.90117
01-SIZ	Sort	25209	Aigüestortes i Estany de Sant Maurici NP	Sort	ES.IGN.SIGLIM.34092525209	4	34092525209	ES5	ES51	ES513	10533.8										99.9821	99.9933	54.0171	1.99275	100	0.999821	1.00194	3.17748	0.996374	1	43.5122	0.55549	2886.01	5723.63	646.191	94.12	81.3354	0.300126	20.2248	0.487323	0.980417	0.813354	356.121	0.995064	0.133496	45.39	55	0.93985	2.34962
01-SIZ	La Torre de Cabdella	25227	Aigüestortes i Estany de Sant Maurici NP	La Torre de Cabdella	ES.IGN.SIGLIM.34092525227	4	34092525227	ES5	ES51	ES513	16583.4										100	99.9512	39.2292	1.99646	99.9063	1	1.00151	2.3076	0.998232	0.999063	26.1282	0.126423	3265.43	2180.03	648.236	96.17	100	0.339583	7.70328	0.488866	1.00177	1	110.67	0.205705	0.0609534	0	34	0.265252	1.32626
01-SIZ	Vielha e Mijaran	25243	Aigüestortes i Estany de Sant Maurici NP	Vielha e Mijaran	ES.IGN.SIGLIM.34092525243	4	34092525243	ES5	ES51	ES513	21140.8										99.9864	99.9938	45.2364	1.98915	100	0.999864	1.00194	2.66096	0.994575	1	33.1469	0.299656	6674.24	3281.68	394.293	95.54	98.1141	0.694077	11.5961	0.297355	0.995208	0.981141	191.277	0.464933	0.147931	50.35	78	2.17707	0.725689
01-SIZ	Vilaller	25245	Aigüestortes i Estany de Sant Maurici NP	Vilaller	ES.IGN.SIGLIM.34092525245	4	34092525245	ES5	ES51	ES513	5860.02										99.9739	99.9994	53.8125	1.99301	100	0.999739	1.002	3.16544	0.996505	1	43.2736	0.549603	8872.57	219.232	405.482	91.6	-99.9805	0.922689	0.774671	0.305793	0.954167	-0.999805	-60.8497	-0.345894	0.094086	39.47	54	0.365631	1.82815
01-SIZ	La Guingueta d'Àneu	25903	Aigüestortes i Estany de Sant Maurici NP	La Guingueta d'Àneu	ES.IGN.SIGLIM.34092525903	4	34092525903	ES5	ES51	ES513	10869.3										100	99.9619	41.8464	1.99829	100	1	1.00162	2.46155	0.999144	1	29.2464	0.203385	5912.15	1352.39	368.963	92.25	87.6897	0.614824	4.77875	0.278253	0.960938	0.876897	50.1933	0.011215	0.050394	8.33	47	0.321543	0
01-SIZ	Alameda del Valle	28003	Sierra de Guadarrama NP	Alameda del Valle	ES.IGN.SIGLIM.34132828003	4	34132828003	ES3	ES30	ES300	2571.9										99.9434	99.9996	78.0561	1.98737	84.192	0.999434	1.002	4.59154	0.993684	0.84192	68.5715	1.174	6057.03	893.427	654.618	87.3	100	0.629891	3.15698	0.493679	0.909375	1	23.7986	-0.0736691	0.0871663	55.92	11	0.502513	0
01-SIZ	Becerril de la Sierra	28018	Sierra de Guadarrama NP	Becerril de la Sierra	ES.IGN.SIGLIM.34132828018	4	34132828018	ES3	ES30	ES300	3052.92										99.8585	99.9832	61.1785	1.83294	77.7532	0.998585	1.00184	3.59873	0.916472	0.777532	45.8632	0.613517	3124.8	949.617	1008.65	86.98	100	0.324958	3.35554	0.760671	0.906042	1	26.9442	-0.0635531	0.358748	73.33	75	0.0183251	0.549753
01-SIZ	El Boalo	28023	Sierra de Guadarrama NP	El Boalo	ES.IGN.SIGLIM.34132828023	4	34132828023	ES3	ES30	ES300	3945.02										99.7959	99.9733	76.6724	1.82121	80.429	0.997959	1.00174	4.51014	0.910603	0.80429	64.4946	1.07337	3774.14	1720.05	886.54	88.08	70.1565	0.392485	6.07791	0.668582	0.9175	0.701565	75.1609	0.0915095	0.362668	58.27	78	0.0407719	0.679532
01-SIZ	Canencia	28034	Sierra de Guadarrama NP	Canencia	ES.IGN.SIGLIM.34132828034	4	34132828034	ES3	ES30	ES300	5415.48										99.9725	99.9516	51.4053	1.99255	99.0432	0.999725	1.00152	3.02384	0.996277	0.990432	40.2358	0.474625	9747.98	574.419	1709.73	91.1	100	1.01372	2.02975	1.28939	0.948958	1	25.6365	-0.0677585	0.0836082	66.78	-13	0.223214	2.23214
01-SIZ	Cercedilla	28038	Sierra de Guadarrama NP	Cercedilla	ES.IGN.SIGLIM.34132828038	4	34132828038	ES3	ES30	ES300	3573.56										99.8789	99.9869	82.3824	1.88301	93.1191	0.998789	1.00187	4.84602	0.941505	0.931191	74.3876	1.31755	13426.5	345.798	433.598	90.57	100	1.39627	1.2219	0.326997	0.943437	1	-2.22795	-0.157369	0.378494	53.04	65	1.75106	1.02145
01-SIZ	Guadarrama	28068	Sierra de Guadarrama NP	Guadarrama	ES.IGN.SIGLIM.34132828068	4	34132828068	ES3	ES30	ES300	5715.88										99.7926	99.7843	51.4863	1.80595	100	0.997926	0.999842	3.0286	0.902974	1	38.5869	0.433927	9760.69	297.844	1715.48	88.24	92.1041	1.01505	1.05245	1.29373	0.919167	0.921041	4.02868	-0.137248	0.433401	43.04	73	1.40845	0.832266
01-SIZ	Lozoya	28076	Sierra de Guadarrama NP	Lozoya	ES.IGN.SIGLIM.34132828076	4	34132828076	ES3	ES30	ES300	5768.62										99.9683	99.9956	77.5718	1.9842	99.2622	0.999683	1.00196	4.56305	0.992099	0.992622	70.9882	1.23365	9319.09	434.012	493.933	87.37	100	0.969123	1.53361	0.372499	0.910104	1	-4.29324	-0.164011	0.0920346	73.84	49	0.178891	3.57782
01-SIZ	Manzanares el Real	28082	Sierra de Guadarrama NP	Manzanares el Real	ES.IGN.SIGLIM.34132828082	4	34132828082	ES3	ES30	ES300	12683.2										99.9757	99.9756	98.8819	1.96011	68.4799	0.999757	1.00176	5.81658	0.980054	0.684799	89.659	1.69448	6212.39	600.898	165.915	89.68	87.3976	0.646047	2.12331	0.125124	0.934167	0.873976	-5.94744	-0.169331	0.226557	58.43	76	0.235294	0.705882
01-SIZ	Miraflores de la Sierra	28085	Sierra de Guadarrama NP	Miraflores de la Sierra	ES.IGN.SIGLIM.34132828085	4	34132828085	ES3	ES30	ES300	5641.4										99.8175	99.8765	53.4987	1.88705	86.8797	0.998175	1.00077	3.14698	0.943526	0.868797	39.165	0.448193	10212.4	597.852	2012.04	89.65	48.0999	1.06202	2.11255	1.51738	0.933854	0.480999	22.1361	-0.0790155	0.287532	65.08	65	0.017191	0.85955
01-SIZ	Los Molinos	28087	Sierra de Guadarrama NP	Los Molinos	ES.IGN.SIGLIM.34132828087	4	34132828087	ES3	ES30	ES300	1916.66										99.667	99.7227	47.0811	1.79343	100	0.99667	0.999225	2.76948	0.896717	1	33.2418	0.301999	5966.57	648.92	1173.28	87.92	79.7004	0.620484	2.29301	0.884828	0.915833	0.797004	10.2231	-0.117327	0.405538	52.18	65	0.023015	0.920598
01-SIZ	Navacerrada	28093	Sierra de Guadarrama NP	Navacerrada	ES.IGN.SIGLIM.34132828093	4	34132828093	ES3	ES30	ES300	2751.34										99.8079	99.9925	85.1888	1.91174	86.8593	0.998079	1.00193	5.01111	0.955871	0.868593	76.7116	1.37491	8867.23	306.539	252.492	91.34	100	0.922133	1.08318	0.190416	0.951458	1	-17.0563	-0.205056	0.280555	62.25	72	0.0345543	0.691085
01-SIZ	Navarredonda y San Mamés	28097	Sierra de Guadarrama NP	Navarredonda y San Mamés	ES.IGN.SIGLIM.34132828097	4	34132828097	ES3	ES30	ES300	2848.05										100	99.997	28.7309	1.99726	100	1	1.00197	1.69005	0.998631	1	13.8132	-0.177535	10285.5	827.973	327.078	95.56	100	1.06962	2.9257	0.246665	0.995417	1	24.748	-0.0706157	0.0622728	77.12	9	1.52672	0
01-SIZ	Pinilla del Valle	28112	Sierra de Guadarrama NP	Pinilla del Valle	ES.IGN.SIGLIM.34132828112	4	34132828112	ES3	ES30	ES300	2542.09										99.9424	99.9878	75.3238	1.98547	88.6013	0.999424	1.00188	4.43081	0.992737	0.886013	66.2174	1.1159	5633.3	709.137	527.577	85.94	100	0.585825	2.50578	0.397871	0.895208	1	7.69374	-0.125461	0.0804861	55.29	34	0.540541	0
01-SIZ	Rascafría	28120	Sierra de Guadarrama NP	Rascafría	ES.IGN.SIGLIM.34132828120	4	34132828120	ES3	ES30	ES300	14923.4										99.9603	99.9951	93.7754	1.98514	82.1104	0.999603	1.00195	5.5162	0.992572	0.821104	86.6287	1.61968	11923.5	227.744	1087.28	90.65	91.9123	1.23996	0.804751	0.81997	0.944271	0.919123	-5.43849	-0.167694	0.101578	61.69	56	1.25598	1.19617
01-SIZ	Soto del Real	28144	Sierra de Guadarrama NP	Soto del Real	ES.IGN.SIGLIM.34132828144	4	34132828144	ES3	ES30	ES300	4283.31										99.8748	99.8227	43.5068	1.84738	95.9257	0.998748	1.00023	2.55922	0.923692	0.959257	28.8229	0.192932	4240.84	2581.87	2176.46	90.85	83.105	0.441019	9.1232	1.64137	0.946354	0.83105	159.66	0.363254	0.379633	45.94	75	0.232369	1.16185
01-SIZ	Amieva	33003	Picos de Europa NP	Amieva	ES.IGN.SIGLIM.34033333003	4	34033333003	ES1	ES12	ES120	11389.7										100	98.6135	99.8841	2	97.3872	1	0.988112	5.87553	1	0.973872	96.7503	1.86951	17410.7	1800.92	831.921	91.56	-105.768	1.81059	6.36367	0.627392	0.95375	-1.05768	73.9544	0.0876295	0.0755713	18.47	4	0.143062	0
01-SIZ	Cabrales	33008	Picos de Europa NP	Cabrales	ES.IGN.SIGLIM.34033333008	4	34033333008	ES1	ES12	ES120	23823.8										99.9928	99.3909	46.6876	1.99679	99.2013	0.999928	0.995901	2.74633	0.998394	0.992013	34.6513	0.336788	8553.24	4653.3	909.488	81.08	42.5744	0.88948	16.4427	0.685889	0.844583	0.425744	285.769	0.768814	0.0868024	14.8	32	0.0996016	0
01-SIZ	Cangas de Onís	33012	Picos de Europa NP	Cangas de Onís	ES.IGN.SIGLIM.34033333012	4	34033333012	ES1	ES12	ES120	21273.6										99.9339	98.0647	36.1118	1.98496	97.9333	0.999339	0.982612	2.12422	0.992478	0.979333	21.5597	0.013664	15509.9	3684.43	911.551	85.44	93.9396	1.61292	13.0192	0.687444	0.89	0.939396	242.979	0.631205	0.163123	22.52	41	0.315856	0.78964
01-SIZ	Onís	33043	Picos de Europa NP	Onís	ES.IGN.SIGLIM.34033333043	4	34033333043	ES1	ES12	ES120	7540.79										99.9712	98.3334	29.8931	1.99181	99.103	0.999712	0.985304	1.75842	0.995903	0.99103	14.6073	-0.157934	11229.2	7902.52	760.189	85.16	17.5339	1.16776	27.9241	0.573295	0.887083	0.175339	514.551	1.50457	0.0916515	14.42	3	0.13459	0
01-SIZ	Peñamellera Alta	33046	Picos de Europa NP	Peñamellera Alta	ES.IGN.SIGLIM.34033333046	4	34033333046	ES1	ES12	ES120	9216.41										99.9773	99.0998	0.566419	1.99586	98.5862	0.999773	0.992984	0.0333188	0.997929	0.985862	-19.8027	-1.00724	11829.2	524.411	205.213	90.6	99.8248	1.23016	1.85304	0.154761	0.94375	0.998248	3.59923	-0.138629	0.0717742	35.68	9	0.183824	0
01-SIZ	Peñamellera Baja	33047	Picos de Europa NP	Peñamellera Baja	ES.IGN.SIGLIM.34033333047	4	34033333047	ES1	ES12	ES120	8381.92										99.977	98.936	7.90684	1.99319	95.7937	0.99977	0.991342	0.465108	0.996594	0.957937	-11.785	-0.809344	17393	79.0073	577.127	85.41	99.0777	1.80876	0.279178	0.435239	0.889687	0.990777	-11.9271	-0.188561	0.113431	28.02	23	0.0793021	0
01-SIZ	Tinajo	35029	Timanfaya NP	Tinajo	ES.IGN.SIGLIM.34053535029	4	34053535029	ES7	ES70	ES708	13935.9										99.9384	100	64.3051	1.94712	100	0.999384	1.002	3.78265	0.973558	1	55.152	0.842782	57.7662	0.797639	186537	88.62	56.0514	0.0060073	0.00281851	140.677	0.923125	0.560514	2743.38	8.67237	0.185041	17.6	79	0.0165893	0.331785
01-SIZ	Yaiza	35034	Timanfaya NP	Yaiza	ES.IGN.SIGLIM.34053535034	4	34053535034	ES7	ES70	ES708	21760.2										99.9341	100	65.9796	1.88928	100	0.999341	1.002	3.88115	0.944642	1	56.5428	0.87711	32.7597	4.37754	160035	91.04	39.228	0.00340679	0.0154683	120.69	0.948333	0.39228	2340.99	7.37831	0.238998	23.46	85	0.129175	0.184536
01-SIZ	Bueu	36004	Islas Atlánticas de Galicia NP	Bueu	ES.IGN.SIGLIM.34123636004	4	34123636004	ES1	ES11	ES114	3063.96										99.4607	99.9342	19.1287	1.84293	77.1786	0.994607	1.00135	1.12522	0.921466	0.771786	-3.71151	-0.610076	42342.5	26.0058	51855.3	89.98	91.1413	4.40334	0.0918933	0.173313	0.937292	0.911413	30.3451	-0.0526159	0.483478	17.49	65	0.164677	0.0823384
01-SIZ	Vigo	36057	Islas Atlánticas de Galicia NP	Vigo	ES.IGN.SIGLIM.34123636057	4	34123636057	ES1	ES11	ES114	11009.2										99.2417	99.808	4.08478	1.38041	71.5374	0.992417	1.00008	0.240281	0.690205	0.715374	-27.2328	-1.19063	19341.6	24.8351	166638	85.54	99.2139	2.0114	0.0877567	0.556946	0.891042	0.992139	-9.2143	-0.179837	0.271594	8.54	67	0.518796	0.535862
01-SIZ	Vilagarcía de Arousa	36060	Islas Atlánticas de Galicia NP	Vilagarcía de Arousa	ES.IGN.SIGLIM.34123636060	4	34123636060	ES1	ES11	ES114	4421.93										99.2639	96.6309	1.18797	1.69809	97.0296	0.992639	0.968246	0.0698806	0.849047	0.970296	-22.9978	-1.0861	35165.8	20.3049	98242.2	84.2	73.9225	3.65701	0.0717487	0.32835	0.877083	0.739225	13.4684	-0.106891	0.499269	12.69	65	0.106726	0.453587
01-SIZ	Adeje	38001	Teide NP	Adeje	ES.IGN.SIGLIM.34053838001	4	34053838001	ES7	ES70	ES709	11065.4										99.7507	96.64	50.2545	1.85266	91.7366	0.997507	0.968336	2.95615	0.926332	0.917366	35.3137	0.353138	2715.21	62.6128	48588.1	91.97	94.1298	0.282364	0.221247	36.6426	0.958021	0.941298	680.91	2.03957	0.501616	32.58	84	0.258365	0.213525
01-SIZ	Agulo	38002	Garajonay NP	Agulo	ES.IGN.SIGLIM.34053838002	4	34053838002	ES7	ES70	ES706	2627.89										100	99.9217	55.2671	2	94.8125	1	1.00122	3.25101	1	0.948125	44.007	0.567705	16402.2	14.6554	18709.3	85.42	88.1488	1.70572	0.0517857	14.1096	0.889792	0.881488	252.767	0.662682	0.187328	0	33	0.281426	1.87617
01-SIZ	Alajeró	38003	Garajonay NP	Alajeró	ES.IGN.SIGLIM.34053838003	4	34053838003	ES7	ES70	ES706	5195.39										99.9835	98.5405	46.1978	1.97077	98.958	0.999835	0.98738	2.71752	0.985387	0.98958	33.594	0.310691	1843.56	419.574	14175.7	83.67	100	0.191717	1.48259	10.6905	0.871563	1	184.728	0.443873	0.17699	7.26	65	1.059	0.504286
01-SIZ	Arico	38005	Teide NP	Arico	ES.IGN.SIGLIM.34053838005	4	34053838005	ES7	ES70	ES709	18695.9										99.8888	99.9999	40.9075	1.9594	81.8302	0.998888	1.002	2.40632	0.979698	0.818302	24.1043	0.0764684	3052.08	41.2745	141781	85.85	98.8218	0.317396	0.145846	106.924	0.894271	0.988218	2085.4	6.55633	0.18596	44.08	63	0.276534	0.131683
01-SIZ	Barlovento	38007	Caldera de Taburiente NP	Barlovento	ES.IGN.SIGLIM.34053838007	4	34053838007	ES7	ES70	ES707	4550.22										100	99.0637	62.8201	2	56.3638	1	0.992622	3.6953	1	0.563638	45.0312	0.592984	14054.3	32.2879	16866	73.68	10.509	1.46155	0.114092	12.7195	0.7675	0.10509	203.354	0.503772	0.191689	27.14	44	0.107585	0.537924
01-SIZ	Breña Alta	38008	Caldera de Taburiente NP	Breña Alta	ES.IGN.SIGLIM.34053838008	4	34053838008	ES7	ES70	ES707	3247.34										99.7836	99.9694	57.8984	1.94232	48.4295	0.997836	1.0017	3.40579	0.971162	0.484295	37.2155	0.400078	16450.4	13.0562	18362.9	82.38	10.509	1.71073	0.0461351	13.8484	0.858125	0.10509	231.369	0.593868	0.398992	3.11	66	1.69948	0.283246
01-SIZ	Fasnia	38012	Teide NP	Fasnia	ES.IGN.SIGLIM.34053838012	4	34053838012	ES7	ES70	ES709	4723.23										99.9806	99.9961	39.7429	1.98564	71.8406	0.999806	1.00196	2.33782	0.992822	0.718406	21.0163	0.000252164	1118.08	12.5296	194593	86.76	100	0.116273	0.0442743	146.752	0.90375	1	2876.32	9.09989	0.22442	20	45	0.0729129	0.364564
01-SIZ	Garachico	38015	Teide NP	Garachico	ES.IGN.SIGLIM.34053838015	4	34053838015	ES7	ES70	ES709	2871.9										99.9362	94.6611	66.6392	1.9502	96.8107	0.999362	0.948508	3.91995	0.975098	0.968107	56.2205	0.869156	11139.8	35.4016	30064.2	85.05	91.8816	1.15847	0.125094	22.6728	0.885937	0.918816	415.223	1.18513	0.359961	8.48	61	0.0414336	0.621504
01-SIZ	Garafía	38016	Caldera de Taburiente NP	Garafía	ES.IGN.SIGLIM.34053838016	4	34053838016	ES7	ES70	ES707	10779.2										99.9794	98.7769	46.9544	1.99689	56.5167	0.999794	0.989748	2.76202	0.998443	0.565167	26.3035	0.130749	9502.71	92.3532	27240.3	74.44	100	0.988219	0.326336	20.5432	0.775417	1	372.663	1.04826	0.109032	34.65	32	1.32576	0
01-SIZ	Granadilla de Abona	38017	Teide NP	Granadilla de Abona	ES.IGN.SIGLIM.34053838017	4	34053838017	ES7	ES70	ES709	16957.4										99.7726	99.9979	23.9476	1.9076	93.4564	0.997726	1.00198	1.40868	0.953799	0.934564	5.93512	-0.37198	2301.39	67.0616	60558.6	86.84	78.6782	0.239329	0.236967	45.6701	0.904583	0.786782	856.756	2.60508	0.435915	16.18	79	0.0491285	0.128161
01-SIZ	La Guancha	38018	Teide NP	La Guancha	ES.IGN.SIGLIM.34053838018	4	34053838018	ES7	ES70	ES709	2499.49										99.8047	92.4962	50.934	1.93977	92.9582	0.998047	0.926816	2.99611	0.969885	0.929582	36.4089	0.380169	9603.71	10.9664	57357.3	84.63	87.7243	0.998721	0.0387505	43.2559	0.881562	0.877243	821.043	2.49023	0.393758	1.12	66	0.387025	0.552893
01-SIZ	Guía de Isora	38019	Teide NP	Guía de Isora	ES.IGN.SIGLIM.34053838019	4	34053838019	ES7	ES70	ES709	15079.4										99.9259	97.3102	49.9102	1.95565	79.6397	0.999259	0.975052	2.9359	0.977825	0.796397	33.6886	0.313027	2949.53	36.2176	73636.9	89.39	86.4715	0.306731	0.127977	55.5331	0.931146	0.864715	1055.27	3.2435	0.327436	21.23	76	0.111993	0.389541
01-SIZ	Güímar	38020	Teide NP	Güímar	ES.IGN.SIGLIM.34053838020	4	34053838020	ES7	ES70	ES709	10737.9										99.7548	99.9849	46.0429	1.91452	80.5481	0.997548	1.00185	2.70841	0.957261	0.805481	29.411	0.207448	3877.63	13.7807	78411.1	83.94	99.1638	0.403247	0.0486952	59.1335	0.874375	0.991638	1129.03	3.4807	0.365954	23.11	65	0.114149	0.622633
01-SIZ	Hermigua	38021	Garajonay NP	Hermigua	ES.IGN.SIGLIM.34053838021	4	34053838021	ES7	ES70	ES706	4104.18										100	99.4513	76.5719	2	89.1081	1	0.996506	4.50423	1	0.891081	67.8363	1.15585	15249.2	13.2359	16631.1	78.95	100	1.58581	0.0467701	12.5423	0.822396	1	219.946	0.557132	0.20191	1.65	53	1.10619	0.553097
01-SIZ	Icod de los Vinos	38022	Teide NP	Icod de los Vinos	ES.IGN.SIGLIM.34053838022	4	34053838022	ES7	ES70	ES709	10026.8										99.8665	94.0424	60.4596	1.93363	91.8979	0.998665	0.942309	3.55645	0.966817	0.918979	47.6644	0.657974	11514.1	16.5779	77595.8	85.68	53.9951	1.19739	0.0585792	58.5187	0.8925	0.539951	1124.14	3.46498	0.417403	6.69	70	0.979697	0.620622
01-SIZ	La Orotava	38026	Teide NP	La Orotava	ES.IGN.SIGLIM.34053838026	4	34053838026	ES7	ES70	ES709	21604.8										99.9109	99.9897	84.5758	1.96182	65.0473	0.999109	1.0019	4.97505	0.980912	0.650473	72.1489	1.2623	4255.33	5.70641	266265	84.54	96.6217	0.442525	0.020164	200.803	0.880625	0.966217	3962.25	12.5922	0.404522	4.52	73	0.344578	0.506024
01-SIZ	El Paso	38027	Caldera de Taburiente NP	El Paso	ES.IGN.SIGLIM.34053838027	4	34053838027	ES7	ES70	ES707	14312.2										99.7988	99.4979	78.2893	1.96168	82.0583	0.997988	0.996973	4.60525	0.980839	0.820583	68.0327	1.1607	11289.7	26.1522	21687.5	77.4	96.6217	1.17406	0.0924108	16.3556	0.80625	0.966217	287.89	0.775636	0.211766	13.46	60	0.267953	0.535906
01-SIZ	Puntagorda	38029	Caldera de Taburiente NP	Puntagorda	ES.IGN.SIGLIM.34053838029	4	34053838029	ES7	ES70	ES707	3246.99										100	99.9695	25.7374	2	87.5552	1	1.0017	1.51397	1	0.875552	7.82436	-0.32535	5227.63	14.7455	33257.5	63.75	83.0485	0.543639	0.0521041	25.081	0.664062	0.830485	443.427	1.27583	0.206898	17.46	59	0.049776	0.99552
01-SIZ	Puntallana	38030	Caldera de Taburiente NP	Puntallana	ES.IGN.SIGLIM.34053838030	4	34053838030	ES7	ES70	ES707	3685.51										100	99.999	52.6167	2	70.0419	1	1.00199	3.0951	1	0.700419	35.9503	0.368849	10978.3	13.1368	11890.2	85.4	68.0782	1.14167	0.0464199	8.96698	0.889583	0.680782	134.509	0.282369	0.228733	8.82	54	0.0411692	0.823384
01-SIZ	Los Realejos	38031	Teide NP	Los Realejos	ES.IGN.SIGLIM.34053838031	4	34053838031	ES7	ES70	ES709	5912.06										99.8669	98.0298	53.9781	1.90142	89.0587	0.998669	0.982262	3.17518	0.950712	0.890587	39.9482	0.467526	10498.4	15.7518	73062.2	85.03	92.9317	1.09177	0.0556601	55.0997	0.885729	0.929317	1061.24	3.2627	0.525921	7.88	73	0.0690265	0.248495
01-SIZ	San Andrés y Sauces	38033	Caldera de Taburiente NP	San Andrés y Sauces	ES.IGN.SIGLIM.34053838033	4	34053838033	ES7	ES70	ES707	4506.31										99.9526	99.9987	76.2746	1.98352	76.6497	0.999526	1.00199	4.48674	0.991761	0.766497	64.9304	1.08413	23618.2	15.9131	14924	85.9	100	2.45613	0.0562302	11.2549	0.894792	1	213.24	0.535567	0.283162	4.85	57	0.483676	2.17654
01-SIZ	San Juan de la Rambla	38034	Teide NP	San Juan de la Rambla	ES.IGN.SIGLIM.34053838034	4	34053838034	ES7	ES70	ES709	2158.38										99.8487	94.0949	56.3107	1.91568	90.8144	0.998487	0.942835	3.31239	0.957839	0.908144	42.3939	0.52789	9170.66	11.2345	66837.7	80.6	96.5706	0.953688	0.0396978	50.4055	0.839583	0.965706	964.083	2.95024	0.404555	9.6	69	0.041425	0.621375
01-SIZ	San Sebastián de la Gomera	38036	Garajonay NP	San Sebastián de la Gomera	ES.IGN.SIGLIM.34053838036	4	34053838036	ES7	ES70	ES706	11863.5										99.9382	99.3969	40.3199	1.96648	95.5938	0.999382	0.995961	2.37176	0.983238	0.955938	26.1256	0.126357	4196.12	80.3786	18143.9	84.69	100	0.436368	0.284023	13.6832	0.882188	1	225.715	0.575683	0.249223	14.26	73	1.36986	0.799087
01-SIZ	Santa Cruz de la Palma	38037	Caldera de Taburiente NP	Santa Cruz de la Palma	ES.IGN.SIGLIM.34053838037	4	34053838037	ES7	ES70	ES707	4564.92										99.8915	99.9922	71.5805	1.9617	80.1257	0.998915	1.00193	4.21062	0.980848	0.801257	59.8712	0.959261	13846.2	17.6949	4369.7	81.7	47.1318	1.43991	0.0625261	3.2954	0.851042	0.471318	22.404	-0.0781541	0.472958	4.14	67	0.770169	1.09107
01-SIZ	Santiago del Teide	38040	Teide NP	Santiago del Teide	ES.IGN.SIGLIM.34053838040	4	34053838040	ES7	ES70	ES709	5441.32										99.9423	96.3071	67.5134	1.94089	94.3577	0.999423	0.965001	3.97137	0.970447	0.943577	56.9964	0.888307	3725.16	28.2783	29031.2	88.72	81.214	0.387392	0.0999232	21.8938	0.924167	0.81214	382.348	1.07941	0.379963	43.42	52	0.38767	0.0945537
01-SIZ	Tijarafe	38047	Caldera de Taburiente NP	Tijarafe	ES.IGN.SIGLIM.34053838047	4	34053838047	ES7	ES70	ES707	5640.62										100	99.9768	35.7164	2	91.6251	1	1.00177	2.10096	1	0.916251	20.3797	-0.0154612	6267	21.9232	28014.1	78.36	100	0.651726	0.077467	21.1267	0.81625	1	373.444	1.05077	0.196516	8.94	53	0.772201	0
01-SIZ	Valle Gran Rey	38049	Garajonay NP	Valle Gran Rey	ES.IGN.SIGLIM.34053838049	4	34053838049	ES7	ES70	ES706	3384.07										99.9147	99.07	61.7649	1.97368	100	0.999147	0.992685	3.63323	0.986842	1	52.2381	0.770862	4995.95	70.7767	9514.39	78.05	95.5105	0.519546	0.250094	7.17526	0.813021	0.955105	94.2604	0.152933	0.334443	0.25	66	0.503317	0
01-SIZ	Vallehermoso	38050	Garajonay NP	Vallehermoso	ES.IGN.SIGLIM.34053838050	4	34053838050	ES7	ES70	ES706	11417.3										100	98.9963	55.5721	2	98.1385	1	0.991947	3.26895	1	0.981385	44.8456	0.588403	9172.88	188.273	12061	74.04	84.6467	0.953919	0.665276	9.09577	0.77125	0.846467	146.654	0.321427	0.1463	3.74	31	0.769746	0
01-SIZ	Vilaflor de Chasna	38052	Teide NP	Vilaflor de Chasna	ES.IGN.SIGLIM.34053838052	4	34053838052	ES7	ES70	ES709	5878.29										99.976	97.8559	55.0188	1.9882	83.9667	0.99976	0.98052	3.2364	0.994099	0.839667	41.0089	0.493706	6707.6	41.8072	22681.2	89.48	94.1677	0.697546	0.147729	17.1049	0.932083	0.941677	296.48	0.80326	0.157134	8.86	60	0	1.23839
01-SIZ	Camaleño	39015	Picos de Europa NP	Camaleño	ES.IGN.SIGLIM.34063939015	4	34063939015	ES1	ES13	ES130	16205.8										100	99.9864	63.7488	2	99.2937	1	1.00187	3.74993	1	0.992937	54.8947	0.836432	14384	235.259	1346.44	84.65	83.1611	1.49584	0.831303	1.01542	0.881771	0.831611	1.11884	-0.146606	0.0720126	33.6	27	0.206186	0
01-SIZ	Cillorigo de Liébana	39022	Picos de Europa NP	Cillorigo de Liébana	ES.IGN.SIGLIM.34063939022	4	34063939022	ES1	ES13	ES130	10451.6										99.9891	99.6528	67.5924	1.98913	99.5222	0.999891	0.998525	3.97602	0.994566	0.995222	59.2845	0.94478	11674.9	74.8831	1002.59	89.18	84.6899	1.21412	0.264604	0.756098	0.928958	0.846899	-19.7865	-0.213837	0.102109	30.07	38	0.151515	0
01-SIZ	Tresviso	39088	Picos de Europa NP	Tresviso	ES.IGN.SIGLIM.34063939088	4	34063939088	ES1	ES13	ES130	1622.39										100	99.7468	100	2	100	1	0.999467	5.88235	1	1	97.6364	1.89137	9549.14	3135.03	1687.06	79.17	-117.703	0.993047	11.0778	1.2723	0.824688	-1.17703	159.817	0.363758	0.0599435	42.11	12	1.42857	0
01-SIZ	Aldealengua de Pedraza	40007	Sierra de Guadarrama NP	Aldealengua de Pedraza	ES.IGN.SIGLIM.34074040007	4	34074040007	ES4	ES41	ES416	3519.18										100	99.9942	92.8556	1.99481	99.9998	1	1.00195	5.4621	0.997403	0.999998	89.2289	1.68386	11697.2	132.128	844.261	100	100	1.21643	0.466883	0.636698	1.04167	1	-12.7665	-0.19126	0.0465822	57.48	-22	1.25	0
01-SIZ	Basardilla	40026	Sierra de Guadarrama NP	Basardilla	ES.IGN.SIGLIM.34074040026	4	34074040026	ES4	ES41	ES416	1903.88										100	99.9242	67.5237	1.99411	99.9948	1	1.00124	3.97198	0.997055	0.999948	59.4046	0.947744	4871.31	386.786	371.49	96.08	82.1846	0.506584	1.36674	0.280159	1.00083	0.821846	-20.4769	-0.216057	0.085923	33.33	62	0.684932	0
01-SIZ	Collado Hermoso	40059	Sierra de Guadarrama NP	Collado Hermoso	ES.IGN.SIGLIM.34074040059	4	34074040059	ES4	ES41	ES416	1636.61										100	99.9943	100	1.99624	99.9356	1	1.00195	5.88235	0.998121	0.999356	97.6355	1.89135	9015.46	327.881	519.036	85.25	100	0.937548	1.15859	0.39143	0.888021	1	-12.4883	-0.190366	0.0888888	56.36	36	0.8	0
01-SIZ	El Espinar	40076	Sierra de Guadarrama NP	El Espinar	ES.IGN.SIGLIM.34074040076	4	34074040076	ES4	ES41	ES416	20498.7										99.8967	99.9212	92.3873	1.93364	99.9963	0.998967	1.00121	5.43455	0.966819	0.999963	88.0302	1.65428	6926.48	993.112	279.957	92.43	88.2795	0.720308	3.50923	0.211129	0.962813	0.882795	25.7255	-0.0674722	0.201011	51.88	66	0.251229	0.43692
01-SIZ	Gallegos	40093	Sierra de Guadarrama NP	Gallegos	ES.IGN.SIGLIM.34074040093	4	34074040093	ES4	ES41	ES416	2176.69										100	99.9995	92.4206	1.99524	100	1	1.002	5.4365	0.997622	1	88.7225	1.67136	5639.88	778.427	913.41	90.91	100	0.58651	2.75063	0.688846	0.946979	1	19.4592	-0.0876243	0.0596711	72.57	-2	1.08696	0
01-SIZ	La Losa	40113	Sierra de Guadarrama NP	La Losa	ES.IGN.SIGLIM.34074040113	4	34074040113	ES4	ES41	ES416	2798.67										99.9294	99.9514	97.2991	1.95565	100	0.999294	1.00152	5.72348	0.977825	1	94.0423	1.80267	7168.88	168.34	465.275	92.59	100	0.745515	0.594843	0.350886	0.964479	1	-26.8855	-0.236667	0.123776	47.8	61	0.185874	1.85874
01-SIZ	Navafría	40139	Sierra de Guadarrama NP	Navafría	ES.IGN.SIGLIM.34074040139	4	34074040139	ES4	ES41	ES416	3044.36										99.9603	99.9912	100	1.98703	100	0.999603	1.00192	5.88235	0.993514	1	97.5477	1.88919	14558.2	233.686	647.223	93.02	100	1.51396	0.825744	0.488102	0.968958	1	-4.06478	-0.163276	0.0954222	44.27	17	6.57895	0
01-SIZ	Otero de Herreros	40152	Sierra de Guadarrama NP	Otero de Herreros	ES.IGN.SIGLIM.34074040152	4	34074040152	ES4	ES41	ES416	4369.1										99.8046	99.7891	94.7174	1.92911	100	0.998046	0.999891	5.57161	0.964554	1	90.6821	1.71973	1302.49	918.414	453.083	92.4	100	0.13545	3.24528	0.341692	0.9625	1	13.6984	-0.106151	0.13618	31.91	56	0.102564	1.02564
01-SIZ	Palazuelos de Eresma	40155	Sierra de Guadarrama NP	Palazuelos de Eresma	ES.IGN.SIGLIM.34074040155	4	34074040155	ES4	ES41	ES416	3669.84										99.5555	99.9836	56.5813	1.9036	100	0.995555	1.00184	3.32831	0.951798	1	45.5501	0.605791	4063.43	1157.82	330.514	95.19	39.2387	0.42257	4.09124	0.249257	0.991563	0.392387	22.9403	-0.0764294	0.310478	41.2	71	2.01005	0.386548
01-SIZ	Real Sitio de San Ildefonso	40181	Sierra de Guadarrama NP	Real Sitio de San Ildefonso	ES.IGN.SIGLIM.34074040181	4	34074040181	ES4	ES41	ES416	14483.6										99.9616	99.9913	99.9992	1.96306	99.9995	0.999616	1.00192	5.8823	0.981532	0.999995	97.3073	1.88325	16488.4	87.1063	378.753	91.34	-14.2009	1.71468	0.307796	0.285636	0.951458	-0.142009	-37.6488	-0.271281	0.180051	14.62	63	0.395108	0
01-SIZ	Santiuste de Pedraza	40188	Sierra de Guadarrama NP	Santiuste de Pedraza	ES.IGN.SIGLIM.34074040188	4	34074040188	ES4	ES41	ES416	2911.54										100	99.634	100	1.99646	100	1	0.998337	5.88235	0.998229	1	97.5784	1.88994	4105.72	168.294	1625.31	87.1	100	0.426968	0.594677	1.22572	0.907292	1	-16.9068	-0.204576	0.0576372	51.61	-21	1.0101	0
01-SIZ	Santo Domingo de Pirón	40190	Sierra de Guadarrama NP	Santo Domingo de Pirón	ES.IGN.SIGLIM.34074040190	4	34074040190	ES4	ES41	ES416	2756.91										100	99.9886	56.5073	1.99791	100	1	1.00189	3.32396	0.998955	1	46.496	0.629138	5450.82	152.61	362.589	100	100	0.566849	0.539257	0.273446	1.04167	1	-31.5756	-0.25175	0.0418881	25.45	32	1.63934	0
01-SIZ	Segovia	40194	Sierra de Guadarrama NP	Segovia	ES.IGN.SIGLIM.34074040194	4	34074040194	ES4	ES41	ES416	16350.2										99.8678	99.8459	48.7734	1.91444	95.8342	0.998678	1.00046	2.86903	0.95722	0.958342	35.6745	0.362043	1370.46	95.2357	478.571	90.6	60.6164	0.142518	0.336522	0.360914	0.94375	0.606164	-52.2026	-0.318085	0.493167	13.97	58	0.937089	0.772857
01-SIZ	Sotosalbos	40199	Sierra de Guadarrama NP	Sotosalbos	ES.IGN.SIGLIM.34074040199	4	34074040199	ES4	ES41	ES416	2391.4										100	99.9975	72.4082	1.9949	99.9376	1	1.00198	4.25931	0.997452	0.999376	65.1622	1.08985	6744.5	300.55	347.209	96.83	100	0.701384	1.06202	0.261847	1.00865	1	-19.3222	-0.212343	0.0667541	59.86	42	0.909091	0
01-SIZ	Torrecaballeros	40203	Sierra de Guadarrama NP	Torrecaballeros	ES.IGN.SIGLIM.34074040203	4	34074040203	ES4	ES41	ES416	4222.65										99.9156	99.9907	81.9251	1.98026	99.9762	0.999156	1.00191	4.81912	0.990128	0.999762	76.2016	1.36233	2634.25	721.358	342.558	89.85	38.9583	0.273944	2.54897	0.25834	0.935937	0.389583	-11.8646	-0.18836	0.155262	27.99	85	0.0746826	2.24048
01-SIZ	Torre Val de San Pedro	40206	Sierra de Guadarrama NP	Torre Val de San Pedro	ES.IGN.SIGLIM.34074040206	4	34074040206	ES4	ES41	ES416	4426.17										100	99.9594	100	1.9951	99.8431	1	1.0016	5.88235	0.997552	0.998431	97.5986	1.89044	8861.83	728.047	872.542	92.19	91.9255	0.921571	2.57261	0.658025	0.960313	0.919255	20.6354	-0.0838418	0.0601547	51.33	-9	0	0
01-SIZ	Trescasas	40207	Sierra de Guadarrama NP	Trescasas	ES.IGN.SIGLIM.34074040207	4	34074040207	ES4	ES41	ES416	3266.54										99.9272	99.9937	75.5342	1.98319	100	0.999272	1.00194	4.44319	0.991594	1	68.7199	1.17766	4469.54	1286.47	321.666	93.15	100	0.464803	4.54584	0.242583	0.970313	1	44.4707	-0.00718848	0.155647	35.6	77	0.0944287	0.944287
01-SIZ	Ortigosa del Monte	40901	Sierra de Guadarrama NP	Ortigosa del Monte	ES.IGN.SIGLIM.34074040901	4	34074040901	ES4	ES41	ES416	1540.51										99.537	99.9976	93.2025	1.90273	100	0.99537	1.00198	5.4825	0.951365	1	88.6243	1.66894	7093.51	682.056	456.437	88.96	100	0.737678	2.41009	0.344221	0.926667	1	8.37314	-0.123277	0.17481	49.24	59	0.181159	0
01-SIZ	Navas de Riofrío	40904	Sierra de Guadarrama NP	Navas de Riofrío	ES.IGN.SIGLIM.34074040904	4	34074040904	ES4	ES41	ES416	1484.84										99.8334	99.8527	92.146	1.9035	100	0.998334	1.00053	5.42035	0.951749	1	87.4193	1.6392	6023.94	96.4183	453.88	84.37	100	0.626449	0.340701	0.342292	0.878854	1	-36.2341	-0.266731	0.149126	68.81	56	0.250627	0
01-SIZ	Aznalcázar	41012	Doñana NP	Aznalcázar	ES.IGN.SIGLIM.34014141012	4	34014141012	ES6	ES61	ES618	45042										99.9955	98.5795	53.0216	1.99515	99.4662	0.999955	0.987771	3.11892	0.997576	0.994662	41.9776	0.517615	473.023	66.5801	232.755	60.53	100	0.0491913	0.235266	0.175532	0.630521	1	-58.1898	-0.33734	0.0900991	1.84	67	0.0222568	1.33541
01-SIZ	La Puebla del Río	41079	Doñana NP	La Puebla del Río	ES.IGN.SIGLIM.34014141079	4	34014141079	ES6	ES61	ES618	37514.1										99.9855	99.8367	45.4804	1.98371	99.337	0.999855	1.00037	2.67532	0.991855	0.99337	33.2153	0.301346	426.236	16.278	200.545	71.63	99.5361	0.0443257	0.0575196	0.15124	0.746146	0.995361	-60.1081	-0.343509	0.169976	4.31	74	0.00839349	0
01-SIZ	Hontanar	45075	Cabañeros NP	Hontanar	ES.IGN.SIGLIM.34084545075	4	34084545075	ES4	ES42	ES425	15170.6										100	99.9884	73.8054	1.99926	98.2259	1	1.00189	4.3415	0.99963	0.982259	66.5054	1.12301	7757.46	45.9454	214.947	88.24	100	0.806724	0.162351	0.162101	0.919167	1	-38.9931	-0.275604	0.0324875	52.53	-55	0.613497	0
01-SIZ	Los Navalucillos	45113	Cabañeros NP	Los Navalucillos	ES.IGN.SIGLIM.34084545113	4	34084545113	ES4	ES42	ES425	35584.2										99.9937	99.9284	54.9189	1.99628	78.0914	0.999937	1.00129	3.23052	0.998139	0.780914	40.216	0.474134	7079.82	72.0536	277.301	89.55	75.1119	0.736254	0.254606	0.209126	0.932812	0.751119	-42.3216	-0.286308	0.0775094	37.62	4	0.177699	0.444247
01-SIZ	Los Baldios	53057	Sierra de Guadarrama NP	Los Baldios	ES.IGN.SIGLIM.34132853057	4	34132853057	ES3	ES30	ES300	509.163										100	100	99.8742	1.93668	96.4392	1	1.002	5.87495	0.968339	0.964392	96.1938	1.85577	15830.5	49.558	327.631	no data	no data	1.64626	0.175116	0.247082	no data	no data	-31.0513	-0.250064	no data	no data	no data	no data	no data
02-BUFFER	Alcolea	04007																			100	99.9815	3.0169	1.9963	73.5198	1	1.00182	0.177465	0.998149	0.735198	-21.7474	-1.05523	3073.93	86.9887	4705.16	63.64	65.6956	0.319668	0.307381	3.54839	0.662917	0.656956	9.90618	-0.118346	0.104719	9.22	38	0.246609	3.69914
02-BUFFER	Alcóntar	04008																			100	99.9527	0.18189	1.99076	97.1766	1	1.00153	0.0106994	0.99538	0.971766	-20.4125	-1.02229	6901.55	73.8923	13.1638	77.53	68.8574	0.717715	0.261104	0.00992744	0.807604	0.688574	-50.3015	-0.311971	0.0733393	26.11	31	0.34662	0
02-BUFFER	Alhabia	04010																			99.8544	99.99	78.2119	1.9604	99.9044	0.998544	1.0019	4.6007	0.9802	0.999044	71.6078	1.24894	621.916	79.5999	39.2615	78.11	-302.948	0.0646751	0.281272	0.0296089	0.813646	-3.02948	-136.806	-0.590164	0.183044	11.71	54	0.147493	1.47493
02-BUFFER	Alhama de Almería	04011																			99.7754	84.2783	32.4539	1.95102	77.0591	0.997754	0.844472	1.90905	0.975512	0.770591	9.94762	-0.272944	2215.78	106.404	24.3323	87.88	37.7568	0.230426	0.375987	0.0183502	0.915417	0.377568	-61.645	-0.348452	0.333514	11.16	61	0.547495	1.36874
02-BUFFER	Alicún	04012																			100	100	47.8959	1.96599	67.0994	1	1.002	2.8174	0.982994	0.670994	29.4679	0.208852	1204.81	118.465	22.8194	91.78	-6.60416	0.125292	0.418605	0.0172092	0.956042	-0.0660416	-70.9779	-0.378466	0.190924	10.24	42	0.460829	4.60829
02-BUFFER	Almócita	04014																			100	99.9971	78.8486	1.99832	92.8354	1	1.00198	4.63815	0.999162	0.928354	71.3529	1.24265	1461.12	266.26	27.3775	83.61	85.4287	0.151947	0.940848	0.0206467	0.870938	0.854287	-43.2267	-0.289219	0.0702745	24.58	-7	0.574713	0
02-BUFFER	Bentarique	04028																			100	99.9972	90.4475	2	76.1187	1	1.00198	5.32044	1	0.761187	81.672	1.49735	740.065	155.223	34.5718	60.8	2.20205	0.0769619	0.548491	0.0260723	0.633333	0.0220205	-73.8624	-0.387742	0.14013	19.12	49	0.420168	0
02-BUFFER	Berja	04029																			99.9239	99.841	14.3008	1.97335	81.6576	0.999239	1.00041	0.841222	0.986675	0.816576	-7.11753	-0.694143	1945.31	108.518	8074.26	90.06	41.7032	0.202299	0.383454	6.08919	0.938125	0.417032	60.602	0.0446888	0.244736	9.48	67	0.178412	0.892061
02-BUFFER	Dalías	04038																			99.9887	99.9535	61.0458	1.99299	90.8812	0.999887	1.00154	3.59093	0.996493	0.908812	49.9532	0.714468	2644.87	168.142	17.9009	95.81	22.9013	0.275049	0.594143	0.0134999	0.998021	0.229013	-57.8055	-0.336104	0.153588	4.24	60	0.0250878	1.00351
02-BUFFER	Enix	04041																			100	98.0912	76.8107	1.99308	90.5858	1	0.982878	4.51828	0.996541	0.905858	68.071	1.16165	761.617	107.576	20361.6	83.19	83.0321	0.0792031	0.380126	15.3556	0.866563	0.830321	250.237	0.654545	0.0717819	59.43	45	0.230415	0
02-BUFFER	Felix	04043																			100	99.9848	60.2678	1.9981	84.9122	1	1.00185	3.54517	0.99905	0.849122	47.9038	0.663884	2584.14	189.38	17.9553	80.81	77.5585	0.268733	0.669189	0.013541	0.841771	0.775585	-48.6236	-0.306575	0.0813217	44.89	37	0.151286	1.51286
02-BUFFER	Gádor	04047																			99.9013	99.493	64.7412	1.95581	86.2812	0.999013	0.996924	3.80831	0.977903	0.862812	52.8992	0.787179	342.992	80.3397	27.6758	87.54	66.4695	0.0356689	0.283886	0.0208717	0.911875	0.664695	-61.6601	-0.3485	0.172955	1.81	57	0.0329272	1.31709
02-BUFFER	Gérgal	04050																			99.9938	99.9976	26.6864	1.99693	98.2512	0.999938	1.00198	1.56979	0.998463	0.982512	11.0536	-0.245645	3327.88	165.503	9.94759	78.98	86.2563	0.346077	0.584816	0.00750195	0.822708	0.862563	-47.5267	-0.303048	0.0618328	9.42	29	0.291262	1.94175
02-BUFFER	Huécija	04051																			100	99.9708	76.8115	1.99561	83.1072	1	1.00171	4.51832	0.997803	0.831072	66.9782	1.13468	496.44	154.422	19.4422	92.82	63.3256	0.0516264	0.545659	0.0146623	0.966875	0.633256	-55.7584	-0.329521	0.148788	12.63	39	0.199601	0
02-BUFFER	Illar	04054																			100	99.9613	78.1911	1.99325	72.2362	1	1.00162	4.59948	0.996627	0.722362	66.4017	1.12045	199.813	113.938	32.6455	93.48	41.5355	0.0207792	0.402606	0.0246195	0.97375	0.415355	-63.2578	-0.353638	0.133288	0.86	22	0.26738	0
02-BUFFER	Instinción	04055																			99.9577	99.9825	89.2091	1.98895	64.889	0.999577	1.00183	5.24759	0.994475	0.64889	77.8473	1.40294	1461.36	204.135	28.2308	77.6	100	0.151972	0.721324	0.0212902	0.808333	1	-45.9416	-0.29795	0.106367	21.57	28	0.232558	2.32558
02-BUFFER	Padules	04071																			100	99.8732	63.1665	1.9933	69.3108	1	1.00073	3.71568	0.996651	0.693108	48.1235	0.669305	2462.24	301.845	29.4326	62.11	79.8373	0.256057	1.06659	0.0221965	0.646979	0.798373	-44.1961	-0.292337	0.125794	25.15	0	0.229358	0
02-BUFFER	Santa Cruz de Marchena	04080																			100	99.9918	64.9294	1.99804	62.5277	1	1.00192	3.81937	0.999019	0.625277	48.9118	0.688764	1537.12	100.361	43.3226	81.16	100	0.15985	0.354633	0.0326717	0.845417	1	-52.1486	-0.317911	0.0966854	22.3	10	0.444444	0
02-BUFFER	Santa Fe de Mondújar	04081																			100	99.9545	77.7778	1.99733	84.8417	1	1.00155	4.57517	0.998664	0.848417	68.4759	1.17164	524.757	71.53	35.7995	62.94	100	0.0545712	0.252756	0.0269981	0.655625	1	-60.201	-0.343808	0.103961	8.89	39	0.2331	2.331
02-BUFFER	Serón	04083																			99.973	99.9668	12.4116	1.98999	89.7086	0.99973	1.00167	0.730097	0.994995	0.897086	-7.52841	-0.704284	4832.19	66.798	55.2319	85.1	90.4886	0.502516	0.236035	0.041653	0.886458	0.904886	-48.569	-0.3064	0.107726	23.57	30	0.961538	1.92308
02-BUFFER	Tabernas	04088																			99.9392	99.9886	30.7509	1.98628	94.7875	0.999392	1.00189	1.80888	0.99314	0.947875	15.0235	-0.147662	1447.94	181.638	30.2271	64.79	83.5166	0.150576	0.641832	0.0227957	0.674896	0.835166	-53.4947	-0.32224	0.103931	10.06	53	0.543626	1.08725
02-BUFFER	Terque	04091																			100	99.9959	72.3171	1.98684	91.0785	1	1.00196	4.25395	0.993419	0.910785	63.2023	1.04148	1750.83	216.659	29.9108	76.28	76.1734	0.182074	0.76558	0.0225571	0.794583	0.761734	-49.4694	-0.309295	0.151229	0	27	0.259067	0
02-BUFFER	Vícar	04102																			99.7998	99.9386	7.72959	1.89003	81.565	0.997998	1.00139	0.454682	0.945016	0.81565	-15.7053	-0.906105	808.051	56.2863	18.2614	89.84	39.0202	0.0840319	0.198892	0.0137718	0.935833	0.390202	-67.5454	-0.367427	0.483024	7.5	84	0.159052	0.238578
02-BUFFER	Navalperal de Pinares	05161																			99.9723	99.5099	39.9238	1.9603	100	0.999723	0.997093	2.34846	0.980152	1	26.5086	0.13581	2443.94	1962.9	232.165	92.65	100	0.254153	6.93606	0.175087	0.965104	1	86.608	0.128323	0.126242	59.28	37	0.122699	1.22699
02-BUFFER	Las Navas del Marqués	05168																			99.8493	99.9841	54.0852	1.94912	100	0.998493	1.00185	3.18148	0.974562	1	43.1277	0.546	4495.14	924.92	304.087	90.19	90.7402	0.467465	3.26827	0.229326	0.939479	0.907402	16.2388	-0.0979809	0.219085	46.36	59	0.385579	0.578369
02-BUFFER	Peguerinos	05184																			99.9643	99.9653	74.348	1.97826	100	0.999643	1.00166	4.37341	0.989129	1	67.2768	1.14205	7685.04	838.456	450.823	90.7	-279.091	0.799193	2.96274	0.339987	0.944792	-2.79091	-54.8839	-0.326708	0.053804	67.52	-19	0.357143	0
02-BUFFER	Santa María del Cubillo	05902																			99.8997	98.9076	35.633	1.95663	94.132	0.998997	0.991058	2.09606	0.978314	0.94132	20.1149	-0.021996	1270.08	1999.19	88.3895	92.41	75.8392	0.13208	7.06429	0.0666588	0.962604	0.758392	79.6805	0.106044	0.0649594	42.58	33	0.647249	0
02-BUFFER	Helechosa de los Montes	06062																			99.9953	99.9922	25.6809	1.99832	98.666	0.999953	1.00193	1.51064	0.999158	0.98666	9.96673	-0.272472	7038.27	124.573	4.26657	68.84	-25.3311	0.731934	0.440188	0.00321762	0.717083	-0.253311	-67.2178	-0.366373	0.043875	52.92	34	0.300752	1.50376
02-BUFFER	Villarta de los Montes	06157																			100	99.9517	0.163367	1.99907	96.4978	1	1.00152	0.0096098	0.999535	0.964978	-20.4871	-1.02413	5734.9	671.05	10.4823	71.26	100	0.596391	2.3712	0.0079052	0.742292	1	-5.64418	-0.168356	0.0600302	44.52	-35	0.210084	2.10084
02-BUFFER	Algaida	07004																			99.976	99.5922	7.44955	1.94398	95.2755	0.99976	0.997918	0.438209	0.97199	0.952755	-12.7874	-0.834085	3154.51	74.1456	1556.28	95.4	86.9509	0.328048	0.261999	1.17366	0.99375	0.869509	-27.4606	-0.238516	0.218845	6.79	52	0.0552486	0.368324
02-BUFFER	Banyalbufar	07007																			99.9474	99.9627	96.3508	1.97362	56.9211	0.999474	1.00163	5.6677	0.986808	0.569211	84.4964	1.56706	10034.9	223.225	400.483	87.5	21.8044	1.04356	0.788782	0.302023	0.911458	0.218044	-34.7226	-0.26187	0.157506	33.18	59	0.20202	0
02-BUFFER	Bunyola	07010																			99.9169	99.9722	67.7604	1.93292	58.178	0.999169	1.00173	3.9859	0.966459	0.58178	50.7007	0.732917	6950.55	164.202	943.389	93.11	43.8353	0.722811	0.58022	0.711455	0.969896	0.438353	-31.5453	-0.251652	0.245019	19.01	70	1.53707	0.301386
02-BUFFER	Calvià	07011																			99.7391	99.5613	22.1331	1.78044	69.9499	0.997391	0.997609	1.30195	0.890219	0.699499	-2.26669	-0.574415	5876.26	258.055	12996.5	84.38	48.3974	0.611092	0.911854	9.80125	0.878958	0.483974	153.742	0.344224	0.48763	42.99	82	0.0957952	0.0611459
02-BUFFER	Campos	07013																			99.9429	99.9978	9.45428	1.9664	100	0.999429	1.00198	0.556134	0.9832	1	-9.1851	-0.745174	1831.3	65.1809	1253.2	90.78	99.5035	0.190442	0.230321	0.945096	0.945625	0.995035	-33.8696	-0.259127	0.232384	32.05	53	0.201574	0.767902
02-BUFFER	Consell	07016																			99.9233	99.9927	0	1.90393	100	0.999233	1.00193	0	0.951964	1	-20.9375	-1.03524	36.8565	2.47391	875.533	88.11	100	0.00383283	0.00874174	0.660281	0.917813	1	-48.1866	-0.30517	0.428036	13.25	64	0.0252398	0.504796
02-BUFFER	Esporles	07020																			99.8918	99.9876	79.6319	1.93278	71.0652	0.998918	1.00188	4.68423	0.966389	0.710652	67.2413	1.14117	7447.08	161.709	392.149	92.02	70.3058	0.774446	0.571409	0.295738	0.958542	0.703058	-33.9361	-0.259341	0.324046	18.34	66	0.404694	0.607042
02-BUFFER	Felanitx	07022																			99.9145	99.9333	0.134366	1.95011	94.6178	0.999145	1.00134	0.00790386	0.975053	0.946178	-21.4077	-1.04685	2238.25	81.5007	1598.94	83.19	85.1365	0.232763	0.287988	1.20584	0.866563	0.851365	-31.1097	-0.250251	0.297362	32.35	57	0.132695	0.403854
02-BUFFER	Llucmajor	07031																			99.9543	99.9584	12.5148	1.94606	97.4525	0.999543	1.00159	0.736162	0.973028	0.974525	-6.30309	-0.674041	2999.77	116.847	894.521	87.23	10.4529	0.311956	0.412889	0.674601	0.908646	0.104529	-51.7476	-0.316622	0.314209	22.98	72	0.397038	0.253428
02-BUFFER	Marratxí	07036																			99.5923	99.8601	0	1.61319	98.501	0.995923	1.0006	0	0.806597	0.98501	-24.2373	-1.11669	1849.22	43.1686	656.759	92.39	72.6339	0.192307	0.152539	0.495294	0.962396	0.726339	-49.4225	-0.309145	0.525711	6.31	81	0.118187	0
02-BUFFER	Puigpunyent	07045																			99.8317	99.9851	72.099	1.93245	73.4447	0.998317	1.00185	4.24112	0.966223	0.734447	58.8392	0.933789	8140.64	217.236	413.673	93.59	35.2822	0.846572	0.767618	0.31197	0.974896	0.352822	-34.9224	-0.262513	0.188948	22.64	59	0.10015	1.0015
02-BUFFER	Sencelles	07047																			99.9636	99.9989	0	1.91026	100	0.999636	1.00199	0	0.95513	1	-20.8648	-1.03345	1849.01	53.2208	1724.39	85.03	67.3061	0.192284	0.188059	1.30044	0.885729	0.673061	-35.2085	-0.263433	0.217658	13.43	52	0.0634115	0.634115
02-BUFFER	Santa Eugènia	07053																			99.9772	99.9901	12.0343	1.92826	89.948	0.999772	1.00191	0.707898	0.964129	0.89948	-8.53631	-0.729161	3991.25	114.759	1644.09	92.84	79.1683	0.415064	0.405509	1.23989	0.967083	0.791683	-23.6154	-0.22615	0.255579	22.3	57	0.0604961	1.20992
02-BUFFER	Santa María del Camí	07056																			99.9519	99.9843	28.2569	1.93725	87.0694	0.999519	1.00185	1.66217	0.968627	0.870694	10.0571	-0.270242	2794.09	86.4419	1012.64	93.61	98.9726	0.290567	0.305448	0.763683	0.975104	0.989726	-33.5094	-0.257969	0.357619	10.35	62	0.283206	0.991221
02-BUFFER	Santanyí	07057																			99.9147	99.9885	24.4776	1.91185	97.658	0.999147	1.00189	1.43986	0.955923	0.97658	7.46797	-0.334146	2209.73	84.6484	9968.29	83.92	70.5493	0.229797	0.299111	7.51757	0.874167	0.705493	92.5227	0.147344	0.284735	19.77	64	0.211491	0.352485
02-BUFFER	Valldemossa	07063																			99.967	99.9677	83.5902	1.9686	52.1645	0.99967	1.00168	4.91707	0.984298	0.521645	68.4873	1.17192	7894.95	194.728	1684.6	93.59	53.2042	0.821022	0.688085	1.27044	0.974896	0.532042	-14.2703	-0.196097	0.193223	36.09	58	0.0512821	1.02564
02-BUFFER	Aldeacentenera	10011																			99.9928	99.9912	3.90628	1.99441	99.0358	0.999928	1.00192	0.229781	0.997206	0.990358	-15.6162	-0.903906	2110.24	456.063	153.065	82.72	76.6974	0.219451	1.61153	0.115434	0.861667	0.766974	-28.4989	-0.241855	0.0716781	34.99	4	0.164204	1.64204
02-BUFFER	Almaraz	10019																			99.2617	99.5779	12.0641	1.83751	95.9728	0.992617	0.997775	0.709653	0.918753	0.959728	-8.42948	-0.726524	1862.8	504.561	58.3522	81.5	71.795	0.193719	1.7829	0.0440062	0.848958	0.71795	-28.2493	-0.241052	0.192463	9.13	63	1.21139	0.605694
02-BUFFER	Arroyomolinos de la Vera	10022																			100	98.5238	20.0213	1.99534	87.5848	1	0.987212	1.17772	0.99767	0.875848	0.769066	-0.499487	5176.5	80.8742	228.313	92.5	100	0.538321	0.285775	0.172182	0.963542	1	-40.8036	-0.281427	0.129928	30.73	11	0.221239	2.21239
02-BUFFER	Barrado	10025																			100	98.2	47.7715	1.99488	83.782	1	0.983968	2.81009	0.997438	0.83782	32.5863	0.28582	5342.28	57.8064	262.772	93.79	100	0.555562	0.204263	0.198169	0.976979	1	-41.3005	-0.283025	0.131032	34.39	23	0.235849	0
02-BUFFER	Belvís de Monroy	10026																			99.9465	99.8423	9.80916	1.95317	96.0037	0.999465	1.00042	0.577009	0.976585	0.960037	-9.72961	-0.758614	2661.72	194.972	66.9907	86.72	100	0.276801	0.688947	0.0505209	0.903333	1	-41.608	-0.284013	0.106903	44.21	44	0.268817	0
02-BUFFER	Berzocana	10029																			99.9896	99.93	37.8499	1.99746	98.4443	0.999896	1.0013	2.22646	0.998729	0.984443	24.2167	0.0792427	4761.94	270.85	62.2096	92.78	100	0.49521	0.957066	0.0469152	0.966458	1	-30.687	-0.248892	0.0540323	38.42	4	4.43459	0
02-BUFFER	Cabañas del Castillo	10033																			100	99.9967	41.5464	1.99833	87.0284	1	1.00197	2.4439	0.999164	0.870284	26.3065	0.130822	4599.84	145.587	111.544	89.93	100	0.478353	0.514442	0.0841207	0.936771	1	-39.7263	-0.277962	0.0601181	33.1	-25	0.894855	0
02-BUFFER	Cabezabellosa	10034																			100	98.0439	57.0898	1.99721	56.6389	1	0.982403	3.35822	0.998604	0.566389	38.1124	0.422213	2198.03	231.292	285.875	87.86	100	0.228581	0.817285	0.215592	0.915208	1	-36.4667	-0.267479	0.0971346	42.32	-16	0.276243	0
02-BUFFER	Campillo de Deleitosa	10042																			100	99.8536	1.2226	1.99559	96.4574	1	1.00054	0.0719178	0.997793	0.964574	-19.3036	-0.994917	7202.53	63.7688	108.745	65.52	100	0.749015	0.225332	0.0820095	0.6825	1	-45.2229	-0.295639	0.0452512	69.91	-92	1.47059	0
02-BUFFER	Cañaveral	10045																			99.8283	96.5062	13.2387	1.95896	98.6344	0.998283	0.966996	0.778748	0.97948	0.986344	-5.80298	-0.661697	2945.73	826.531	102.786	89.76	-31.3936	0.306336	2.92061	0.0775157	0.935	-0.313936	-21.4896	-0.219314	0.106104	35.75	28	0.095511	0.95511
02-BUFFER	Casas del Castañar	10054																			99.7345	99.4069	38.3936	1.94933	79.7739	0.997345	0.996061	2.25845	0.974665	0.797739	20.4851	-0.0128598	5381.07	141.219	293.629	97.5	100	0.559595	0.499007	0.22144	1.01562	1	-34.0867	-0.259825	0.143209	57.06	27	3.367	1.6835
02-BUFFER	Collado de la Vera	10065																			99.9502	96.6461	5.47289	1.99186	91.3494	0.999502	0.968398	0.321935	0.995928	0.913494	-16.0149	-0.913745	5002.41	230.89	137.901	61.9	100	0.520218	0.815867	0.103997	0.644792	1	-38.3025	-0.273383	0.0538134	61.02	67	0.985222	0
02-BUFFER	Cuacos de Yuste	10068																			99.9882	98.2473	13.7359	1.986	92.5878	0.999882	0.984442	0.807996	0.992998	0.925878	-5.77605	-0.661033	5266.45	201.481	181.029	93.02	100	0.547676	0.711947	0.136522	0.968958	1	-32.6979	-0.255359	0.117735	32.8	35	0.117647	1.17647
02-BUFFER	Fresnedoso de Ibor	10075																			99.975	99.2746	7.08568	1.99229	96.9386	0.99975	0.994735	0.416805	0.996144	0.969386	-12.4636	-0.826093	2906.12	79.4575	108.661	60.53	79.3092	0.302217	0.280769	0.0819468	0.630521	0.793092	-58.2291	-0.337466	0.0682768	0	-56	0.367647	3.67647
02-BUFFER	Galisteo	10076																			99.7596	98.6545	3.98229	1.94176	100	0.997596	0.988522	0.234252	0.970878	1	-16.1751	-0.917699	1520.55	446.522	42.2956	73.04	95.7667	0.158127	1.57782	0.0318971	0.760833	0.957667	-30.2732	-0.247561	0.11138	20.82	57	0.203046	2.03046
02-BUFFER	Gargüera	10081																			100	99.0278	5.76345	1.99864	100	1	0.992263	0.339027	0.999318	1	-13.3878	-0.848906	2920.24	910.384	145.716	83.67	100	0.303686	3.21691	0.109891	0.871563	1	10.0409	-0.117913	0.0431649	52.21	-61	0.75188	0
02-BUFFER	Garrovillas de Alconétar	10082																			99.9732	99.9378	24.5408	1.99461	100	0.999732	1.00138	1.44358	0.997307	1	8.83993	-0.300284	1236.92	2037.87	117.941	84.02	100	0.128632	7.20094	0.0889449	0.875208	1	85.8744	0.125964	0.0947775	38.92	28	0.0475737	1.42721
02-BUFFER	Hinojal	10098																			99.9521	99.9705	45.3074	1.9879	100	0.999521	1.00171	2.66514	0.99395	1	33.2064	0.301125	475.969	3469.58	160.265	77.78	100	0.0494976	12.26	0.120863	0.810208	1	184.812	0.444141	0.0749107	63.21	1	0.2457	0
02-BUFFER	Holguera	10099																			99.9902	95.3264	0	1.99095	100	0.999902	0.955174	0	0.995473	1	-20.989	-1.03652	918.577	257.972	34.2629	77.82	100	0.0955259	0.91156	0.0258393	0.810625	1	-43.129	-0.288905	0.127452	7.58	40	0.151745	1.51745
02-BUFFER	Jaraíz de la Vera	10104																			99.9603	97.4079	6.76126	1.96803	84.3893	0.999603	0.976031	0.397721	0.984013	0.843893	-15.9748	-0.912755	4545.27	91.6026	153.453	87.27	83.0028	0.472678	0.323684	0.115727	0.909062	0.830028	-46.9764	-0.301278	0.290886	14.39	60	0.307031	0.921093
02-BUFFER	Jarandilla de la Vera	10105																			99.9425	99.397	4.76443	1.97693	95.6282	0.999425	0.995962	0.280261	0.988467	0.956282	-15.5921	-0.90331	7650.06	276.62	192.056	93.78	86.911	0.795556	0.977454	0.144838	0.976875	0.86911	-24.7233	-0.229713	0.201542	48.98	47	0.0346861	1.04058
02-BUFFER	Majadas	10114																			99.6994	98.3982	25.2257	1.95416	100	0.996994	0.985954	1.48387	0.977082	1	8.87795	-0.299345	4775.28	167.269	25.5305	91.74	100	0.496597	0.591056	0.0192538	0.955625	1	-38.7494	-0.27482	0.145097	5.05	68	0.0747384	0.747384
02-BUFFER	Mesas de Ibor	10120																			100	99.9156	16.3325	1.99743	100	1	1.00116	0.960738	0.998717	1	-0.787747	-0.537912	1632.03	115.129	96.2258	74.29	100	0.16972	0.406815	0.0725684	0.773854	1	-51.5408	-0.315957	0.0541753	61.57	-44	0.574713	0
02-BUFFER	Millanes	10122																			99.9828	99.8162	0	1.96949	100	0.999828	1.00016	0	0.984743	1	-20.3053	-1.01964	1638.72	29.1745	59.5217	71.05	48.8943	0.170416	0.10309	0.0448881	0.740104	0.488943	-69.0512	-0.372269	0.108144	41.87	13	0.414938	0
02-BUFFER	Monroy	10125																			99.9955	99.9856	2.58195	1.99731	99.9801	0.999955	1.00186	0.15188	0.998655	0.999801	-16.957	-0.936999	2050.66	121.693	113.707	87.56	100	0.213255	0.430012	0.0857519	0.912083	1	-47.178	-0.301926	0.0655918	40.07	39	0.100908	0
02-BUFFER	Navalmoral de la Mata	10131																			99.9294	97.1334	1.03633	1.95707	100	0.999294	0.97328	0.0609604	0.978535	1	-19.7586	-1.00615	1807.08	447.142	29.5602	84.93	93.3993	0.187924	1.58001	0.0222928	0.884688	0.933993	-27.8219	-0.239678	0.303888	8.63	72	0.693762	0.809389
02-BUFFER	Pasarón de la Vera	10138																			100	97.7351	8.62644	1.9947	89.3746	1	0.979309	0.507437	0.997349	0.893746	-12.4432	-0.825589	4252.19	363.552	192.203	82.14	100	0.4422	1.28464	0.144949	0.855625	1	-25.4518	-0.232056	0.116997	27.79	24	0.153139	0
02-BUFFER	Pedroso de Acim	10139																			99.9327	95.8561	35.8186	1.98834	100	0.999327	0.960482	2.10698	0.994168	1	21.2191	0.00525716	4116.6	417.076	38.5943	81.82	100	0.428099	1.47377	0.0291058	0.852292	1	-24.3347	-0.228463	0.0525114	54.31	-38	1.05263	0
02-BUFFER	Plasencia	10148																			99.8688	99.5121	11.0496	1.94593	93.5787	0.998688	0.997115	0.649978	0.972963	0.935787	-8.90936	-0.738369	1909.79	1156.45	101.136	84.1	2.36091	0.198605	4.08638	0.0762714	0.876042	0.0236091	5.21812	-0.133423	0.397923	11.76	67	0.896928	0.792864
02-BUFFER	Portezuelo	10151																			99.9874	99.9608	37.5763	1.99745	100	0.999874	1.00161	2.21037	0.998725	1	24.2115	0.0791159	1949.63	888.95	99.4815	50.54	100	0.202749	3.14117	0.0750238	0.526458	1	-1.09206	-0.153716	0.0401343	51.97	6	0.4329	4.329
02-BUFFER	Riolobos	10155																			99.9864	99.0482	2.83764	1.99177	97.5023	0.999864	0.992467	0.16692	0.995884	0.975023	-17.3969	-0.947855	1404.02	181.264	39.0434	71.31	100	0.146009	0.640509	0.0294445	0.742812	1	-48.8245	-0.307221	0.148694	8.07	52	0.0789889	0.789889
02-BUFFER	Robledollano	10159																			99.9756	98.8281	29.3335	1.99437	63.0178	0.999756	0.990261	1.7255	0.997183	0.630178	6.85759	-0.349211	4578.12	161.12	108.735	93.71	100	0.476094	0.56933	0.0820024	0.976146	1	-37.9285	-0.272181	0.0685897	4.83	7	0.306748	0
02-BUFFER	Santiago del Campo	10170																			99.9857	99.8557	33.0239	1.9952	100	0.999857	1.00056	1.94258	0.9976	1	18.8119	-0.0541562	644.131	955.596	159.54	86.6	100	0.0669854	3.37667	0.120317	0.902083	1	9.32103	-0.120228	0.0567804	51.47	-11	0.363636	0
02-BUFFER	Talaván	10178																			99.9914	99.8998	36.6373	1.99583	100	0.999914	1.001	2.15513	0.997917	1	23.0793	0.0511688	906.649	1542.63	138.708	85.57	98.3979	0.0942854	5.45098	0.104606	0.891354	0.983979	50.504	0.0122142	0.0866711	41.97	7	2.3753	2.3753
02-BUFFER	Talayuela	10180																			99.9213	99.3943	19.4752	1.97059	100	0.999213	0.995935	1.1456	0.985294	1	2.52081	-0.456251	2433.65	665.775	23.92	86.59	60.0387	0.253083	2.35256	0.0180393	0.901979	0.600387	-17.479	-0.206416	0.206531	5.47	81	0.327065	0.545108
02-BUFFER	Tejeda de Tiétar	10181																			99.8773	99.2314	6.21006	1.97653	100	0.998773	0.994302	0.365298	0.988267	1	-13.0672	-0.840992	2680.94	648.919	64.2543	97.95	100	0.2788	2.293	0.0484572	1.02031	1	-7.18864	-0.173322	0.115233	14.44	44	0.249377	1.24688
02-BUFFER	El Torno	10184																			99.981	98.7683	32.4059	1.98966	77.6254	0.99981	0.989663	1.90623	0.994832	0.776254	13.3357	-0.18932	3695.59	344.104	295.004	96.45	100	0.384316	1.21592	0.222477	1.00469	1	-23.4521	-0.225625	0.184485	29.6	22	0.111483	2.22965
02-BUFFER	Torrecillas de la Tiesa	10186																			99.9886	99.7019	5.57892	1.98873	100	0.999886	0.999017	0.328172	0.994364	1	-13.5712	-0.853432	1498.88	831.291	160.147	75.58	99.9953	0.155874	2.93742	0.120775	0.787292	0.999953	0.026313	-0.15012	0.0836475	37.5	37	0.0906618	0.906618
02-BUFFER	Trujillo	10195																			99.9481	99.6581	18.5114	1.98253	100	0.999481	0.998578	1.08891	0.991263	1	1.5646	-0.479852	1237.66	2390.15	151.114	87.71	73.3329	0.128708	8.44577	0.113962	0.913646	0.733329	106.708	0.192964	0.115594	15.22	53	0.237222	0.754798
02-BUFFER	Valdecañas de Tajo	10197																			100	99.7342	23.9417	1.99178	99.9614	1	0.99934	1.40834	0.995892	0.999614	8.06365	-0.319444	3944.82	72.8582	108.077	76.47	-109.327	0.410235	0.257449	0.0815062	0.796562	-1.09327	-90.9503	-0.442696	0.0711701	50.44	48	0.813008	0
02-BUFFER	Valdehúncar	10199																			99.9616	99.9732	6.83359	1.98511	100	0.999616	1.00174	0.401976	0.992557	1	-12.0823	-0.816682	1232.49	47.8157	39.0539	91.55	94.2872	0.128171	0.16896	0.0294524	0.953646	0.942872	-55.538	-0.328812	0.0794028	26.15	-11	0.558659	0
02-BUFFER	Chipiona	11016																			99.1363	99.7542	0	1.70605	100	0.991363	0.999541	0	0.853027	1	-23.1214	-1.08915	61.0771	5.87954	231338	69.3	-133.645	0.00635161	0.0207758	0.773187	0.721875	-1.33645	-96.2851	-0.459852	0.512278	61.76	75	0.109925	0.680486
02-BUFFER	Sanlúcar de Barrameda	11032																			99.4705	99.8818	22.498	1.8714	100	0.994705	1.00082	1.32341	0.9357	1	5.09273	-0.392771	112.685	7.48281	69082.8	68.35	8.56285	0.0117185	0.026441	0.230892	0.711979	0.0856285	-78.6668	-0.403193	0.519144	15.65	75	0.211413	0.561798
02-BUFFER	Trebujena	11037																			99.9708	100	2.54466	1.98109	93.384	0.999708	1.002	0.149686	0.990546	0.93384	-18.4843	-0.974696	0	0	2039.42	63.81	-39.8081	0	0	1.53803	0.664687	-0.398081	-63.9073	-0.355727	0.284728	5.27	68	0.282925	1.1317
02-BUFFER	Almagro	13013																			99.8794	99.793	4.8158	1.96775	98.9522	0.998794	0.99993	0.283282	0.983874	0.989522	-14.8919	-0.88603	573.807	40.3185	394.461	87.99	50.8438	0.0596721	0.142468	0.297482	0.916562	0.508438	-61.5075	-0.348009	0.178031	6.98	62	0.222643	1.00189
02-BUFFER	Anchuras	13017																			99.9939	99.6433	11.3569	1.99786	87.7229	0.999939	0.99843	0.668054	0.998932	0.877229	-9.14831	-0.744266	4689.6	73.1454	15.6667	90.98	100	0.487687	0.258464	0.011815	0.947708	1	-45.8865	-0.297773	0.0344695	44.1	2	1.23839	0
02-BUFFER	Arenas de San Juan	13018																			99.9188	92.795	0	1.98052	100	0.999188	0.92981	0	0.990262	1	-21.6148	-1.05196	64.3245	1.42399	721.154	77.99	99.9429	0.00668932	0.00503178	0.543857	0.812396	0.999429	-52.6519	-0.31953	0.118819	10.23	48	0.0951475	0.951475
02-BUFFER	Bolaños de Calatrava	13023																			99.7567	99.5419	0	1.93702	99.5237	0.997567	0.997414	0	0.968512	0.995237	-20.8254	-1.03248	459.013	8.10251	464.42	89.03	51.0633	0.0477343	0.0286308	0.350241	0.927396	0.510633	-62.7073	-0.351868	0.331104	9.37	64	0.168322	0.757448
02-BUFFER	Carrión de Calatrava	13031																			99.9898	98.5251	0	1.98107	100	0.999898	0.987225	0	0.990536	1	-20.4468	-1.02313	246.377	8.14326	656.001	86.61	91.1912	0.0256216	0.0287748	0.494722	0.902188	0.911912	-52.7356	-0.319799	0.160807	22.49	58	0.651678	0.977517
02-BUFFER	Los Cortijos	13036																			99.9711	99.9875	0.65213	1.98918	84.6296	0.999711	1.00188	0.0383606	0.994589	0.846296	-22.3833	-1.07093	3106.69	45.2254	270.051	89.32	100	0.323075	0.159807	0.203658	0.930417	1	-47.6609	-0.303479	0.0913271	39.51	14	0.110619	0
02-BUFFER	Fernán Caballero	13040																			99.9769	99.9106	13.7681	1.99102	99.8743	0.999769	1.00111	0.809889	0.995508	0.998743	-3.89966	-0.61472	1443.45	16.5175	191.987	80.76	100	0.15011	0.0583657	0.144786	0.84125	1	-56.1098	-0.33065	0.093585	40.76	28	0.097371	1.94742
02-BUFFER	Fontanarejo	13041																			99.9903	99.7759	0.137983	1.99568	92.3309	0.999903	0.999758	0.00811662	0.99784	0.923309	-21.4215	-1.04719	3684.02	42.603	33.8044	59.52	86.0433	0.383114	0.150541	0.0254936	0.62	0.860433	-59.2084	-0.340615	0.056974	23.81	-26	0.377358	0
02-BUFFER	Fuente el Fresno	13044																			99.974	99.5914	0.1758	1.9805	89.1814	0.99974	0.997909	0.0103412	0.990252	0.891814	-22.1989	-1.06638	2004.3	31.3722	215.221	88.71	99.5111	0.208434	0.110856	0.162308	0.924063	0.995111	-51.9846	-0.317384	0.157655	20.5	47	0.0906071	0.604047
02-BUFFER	Herencia	13047																			99.9742	99.586	1.86274	1.97412	98.7332	0.999742	0.997856	0.109573	0.987058	0.987332	-18.3688	-0.971844	738.379	15.5712	452.261	89.4	94.218	0.0767865	0.0550219	0.341071	0.93125	0.94218	-53.0738	-0.320887	0.184641	17.83	53	0.23722	0.948879
02-BUFFER	Las Labores	13050																			99.8402	99.2344	0	1.96835	100	0.998402	0.994332	0	0.984173	1	-20.4619	-1.02351	328.083	1.55288	576.598	79.9	100	0.0341184	0.0054872	0.43484	0.832292	1	-53.8652	-0.323432	0.124077	24.8	37	0.172414	0
02-BUFFER	Malagón	13052																			99.9213	99.8502	1.31534	1.97791	82.0779	0.999213	1.0005	0.0773731	0.988956	0.820779	-22.2635	-1.06797	1189.83	24.3114	264.057	90.02	46.263	0.123734	0.085906	0.199138	0.937708	0.46263	-63.8177	-0.355439	0.1444	25.65	39	0.296004	0.616675
02-BUFFER	Manzanares	13053																			99.9552	99.9898	0	1.96499	99.8324	0.999552	1.0019	0	0.982493	0.998324	-20.3546	-1.02086	97.9109	8.03889	777.194	88.07	64.4269	0.0101821	0.028406	0.586119	0.917396	0.644269	-56.2726	-0.331174	0.193538	6.75	62	0.768977	0.933758
02-BUFFER	Miguelturra	13056																			99.9659	99.8798	12.5164	1.9489	100	0.999659	1.0008	0.736261	0.974451	1	-5.77659	-0.661046	1346.79	50.7367	276.151	87.34	88.585	0.140058	0.179282	0.208259	0.909792	0.88585	-53.5352	-0.322371	0.317949	8.67	73	0.131363	0.853859
02-BUFFER	Moral de Calatrava	13058																			99.9771	99.1803	0.627224	1.98883	96.9674	0.999771	0.99379	0.0368955	0.994415	0.969674	-20.1091	-1.0148	730.594	21.0353	179.112	90.2	100	0.0759769	0.0743295	0.135077	0.939583	1	-55.5007	-0.328692	0.158934	25.46	41	0.376719	0.941797
02-BUFFER	Navalpino	13059																			99.9934	99.9434	9.7254	1.99797	85.0986	0.999934	1.00144	0.572082	0.998985	0.850986	-11.5315	-0.803088	5306.93	47.7521	62.8626	76.39	29.5005	0.551885	0.168735	0.0474077	0.795729	0.295005	-62.8247	-0.352245	0.0323176	37.12	-27	0.4329	0
02-BUFFER	Piedrabuena	13063																			99.993	99.8356	7.61905	1.99461	91.6095	0.99993	1.00036	0.44818	0.997304	0.916095	-12.7627	-0.833476	3619.1	39.3398	37.1381	89.55	100	0.376362	0.13901	0.0280076	0.932812	1	-50.4762	-0.312533	0.0855038	32.8	45	0.442772	0.885544
02-BUFFER	Porzuna	13065																			99.9738	99.9743	2.86805	1.98537	91.2619	0.999738	1.00175	0.168709	0.992683	0.912619	-18.4901	-0.974839	646.826	16.532	104.436	89.37	88.5549	0.0672656	0.0584169	0.0787601	0.930938	0.885549	-59.5814	-0.341815	0.125356	24.91	39	0.60556	1.10102
02-BUFFER	Pozuelo de Calatrava	13066																			99.9397	99.8147	18.8473	1.98107	100	0.999397	1.00015	1.10866	0.990534	1	1.97485	-0.469726	378.203	19.885	199.467	91.07	80.5616	0.0393306	0.070265	0.150428	0.948646	0.805616	-59.7143	-0.342242	0.16551	11.2	63	0.0295683	0.887049
02-BUFFER	Puerto Lápice	13070																			99.7192	99.6768	0.0092714	1.92873	100	0.997192	0.998766	0.000545377	0.964366	1	-20.7826	-1.03142	1073.53	22.9361	309.579	85.39	100	0.11164	0.0810462	0.233468	0.889479	1	-53.6873	-0.32286	0.122422	30.49	38	0.105597	0
02-BUFFER	Villarta de San Juan	13097																			99.9007	95.959	0	1.94315	100	0.999007	0.961513	0	0.971577	1	-21.358	-1.04562	171.578	32.6292	734.147	92.78	86.3671	0.0178429	0.115298	0.553656	0.966458	0.863671	-49.6615	-0.309913	0.194175	6.68	56	0.698568	0.698568
02-BUFFER	El Robledo	13901																			99.9962	99.9728	2.33439	1.99222	97.2341	0.999962	1.00173	0.137317	0.996111	0.972341	-17.8508	-0.959058	614.559	12.6163	66.0285	94.68	79.2262	0.06391	0.0445807	0.0497952	0.98625	0.792262	-61.264	-0.347226	0.0976669	45.02	39	0.090009	1.80018
02-BUFFER	Boiro	15011																			99.7264	96.2744	0	1.9329	92.5343	0.997264	0.964673	0	0.966452	0.925343	-22.9254	-1.08431	33483.3	95.7771	56325.9	87.06	74.5309	3.48204	0.338435	0.188255	0.906875	0.745309	13.2182	-0.107695	0.40426	7.66	62	0.211808	0.105904
02-BUFFER	A Pobra do Caramiñal	15067																			99.6622	98.6321	1.12032	1.82441	95.889	0.996622	0.988297	0.0659013	0.912204	0.95889	-21.5617	-1.05065	32078.7	109.92	72233	87.01	78.8186	3.33597	0.388408	0.241421	0.906354	0.788186	13.2068	-0.107732	0.442473	14.12	56	0.211864	0.529661
02-BUFFER	Porto do Son	15071																			99.7782	96.7586	5.59918	1.96004	97.5696	0.997782	0.969525	0.329363	0.98002	0.975696	-14.9523	-0.887519	25352.2	133.953	59329.6	90.87	77.5691	2.63646	0.473332	0.198294	0.946563	0.775691	0.606815	-0.148253	0.28606	22.51	54	0.442239	0.32359
02-BUFFER	Rianxo	15072																			99.5946	95.9625	0.380457	1.92685	92.5717	0.995946	0.961548	0.0223798	0.963423	0.925717	-22.6197	-1.07677	39937.7	135.797	55678.4	84.51	95.0327	4.15326	0.479847	0.186091	0.880313	0.950327	32.9967	-0.0440883	0.383663	3.88	53	0.187701	0.0893815
02-BUFFER	Albuñán	18005																			100	99.5248	0	1.97346	100	1	0.997243	0	0.986728	1	-20.3206	-1.02002	145.249	4.65212	4254.96	60.67	100	0.0151049	0.0164386	3.20887	0.631979	1	-2.55224	-0.158412	0.200671	25.07	35	0.239234	0
02-BUFFER	Albuñuelas	18007																			100	99.9942	0.18448	1.99952	68.4147	1	1.00195	0.0108517	0.999759	0.684147	-26.0659	-1.16182	3341.57	77.1695	209.176	36.12	100	0.347501	0.272684	0.15775	0.37625	1	-56.9163	-0.333244	0.0743213	12.48	31	0.119617	3.58852
02-BUFFER	Alhendín	18014																			99.1196	99.758	0	1.78913	39.7927	0.991196	0.999579	0	0.894564	0.397927	-34.3347	-1.36591	609.277	38.2384	973.113	84.99	-5.6235	0.0633607	0.135118	0.733871	0.885312	-0.056235	-64.7714	-0.358506	0.339651	8.06	69	0.0112007	0.560036
02-BUFFER	Almegíjar	18016																			99.9636	99.9815	0.162291	1.98683	27.0699	0.999636	1.00182	0.00954654	0.993416	0.270699	-34.4977	-1.36993	1088.98	87.7942	12410	65.55	100	0.113246	0.310227	9.359	0.682812	1	129.306	0.265636	0.106574	28.46	-4	0.552486	0
02-BUFFER	Alquife	18018																			99.8544	99.9972	0.817075	1.59147	100	0.998544	1.00198	0.0480632	0.795735	1	-23.1136	-1.08896	1404.3	42.3366	2393.69	69.77	55.4298	0.146038	0.149599	1.8052	0.726771	0.554298	-32.3619	-0.254279	0.218131	17.06	41	3.00752	3.00752
02-BUFFER	Armilla	18021																			99.2365	sin dato	0	1.25222	100	0.992365	sin dato	0	0.626112	1	-34.5381	-1.37093	0	0	88.6112	79.91	29.5109	0	0	0.066826	0.832396	0.295109	-76.1134	-0.394981	0.0158451	2.36	76	0.0832362	0.624272
02-BUFFER	Baza	18023																			99.975	99.9809	61.2495	1.98107	93.9234	0.99975	1.00181	3.60291	0.990535	0.939234	50.6849	0.732526	2795.33	71.1976	1203.32	83.06	16.7573	0.290696	0.251582	0.907481	0.865208	0.167573	-50.3492	-0.312125	0.191762	5.89	62	0.595872	1.06579
02-BUFFER	Beas de Granada	18024																			99.951	99.9843	54.7589	1.97368	57.1997	0.99951	1.00185	3.22111	0.986841	0.571997	35.6261	0.360848	2621.08	48.2279	20.8731	87.04	100	0.272575	0.170417	0.0157414	0.906667	1	-52.692	-0.319659	0.189262	4.66	60	0.1	2
02-BUFFER	Beas de Guadix	18025																			100	99.9748	0	1.9951	69.5198	1	1.00175	0	0.997552	0.695198	-26.11	-1.16291	1673.01	38.1612	1907.16	46.3	100	0.173982	0.134845	1.43828	0.482292	1	-35.412	-0.264087	0.137792	19.34	37	0.289855	2.89855
02-BUFFER	Cádiar	18035																			99.9791	99.533	1.61118	1.98913	39.1798	0.999791	0.997325	0.0947756	0.994564	0.391798	-30.4349	-1.26966	1181.1	53.9643	10187.8	55.9	23.7732	0.122826	0.190687	7.6831	0.582292	0.237732	76.3328	0.0952784	0.166563	23.59	35	0.0672948	2.69179
02-BUFFER	Cájar	18036																			99.7467	100	0.873571	1.24502	99.5108	0.997467	1.002	0.0513866	0.62251	0.995108	-26.6305	-1.17576	21.3395	2.03086	90.6975	86.57	100	0.00221917	0.0071762	0.0683993	0.901771	1	-60.4087	-0.344476	0.0470239	13.54	74	0.0395726	0.791452
02-BUFFER	Carataunas	18043																			100	99.9643	3.24773	1.97556	86.623	1	1.00165	0.191043	0.98778	0.86623	-19.066	-0.989053	1445.51	62.9058	17826.2	65.52	100	0.150323	0.222282	13.4436	0.6825	1	209.975	0.525064	0.177195	2.03	48	0.558659	0
02-BUFFER	Cástaras	18044																			100	99.9602	9.16718	1.99691	48.1597	1	1.00161	0.539246	0.998453	0.481597	-19.582	-1.00179	1780.89	338.991	10351.1	66.23	100	0.185201	1.19785	7.80623	0.689896	1	117.584	0.227939	0.0887	40.4	5	0.819672	0
02-BUFFER	Cenes de la Vega	18047																			99.7101	96.6136	0.176851	1.84049	92.0978	0.997101	0.968073	0.010403	0.920243	0.920978	-23.664	-1.10254	2045.76	52.0744	13.186	79.79	84.3702	0.212746	0.184009	0.00994423	0.831146	0.843702	-58.3691	-0.337916	0.387067	11.13	88	0.253261	0.379891
02-BUFFER	Cogollos de Guadix	18049																			99.8761	99.9967	47.1598	1.9568	100	0.998761	1.00197	2.7741	0.978399	1	35.0647	0.346991	1760.46	38.5332	2142.69	73.18	20.0317	0.183076	0.13616	1.61591	0.762292	0.200317	-42.045	-0.285419	0.139621	34.13	26	0.151745	1.51745
02-BUFFER	Cortes y Graena	18054																			99.932	99.9073	0	1.9473	23.5825	0.99932	1.00107	0	0.97365	0.235825	-35.8026	-1.40214	1366.49	51.6785	845.78	54	-4.30577	0.142106	0.18261	0.637843	0.5625	-0.0430577	-70.36	-0.376478	0.193954	29.06	42	0.402414	0
02-BUFFER	Cúllar Vega	18057																			99.4441	100	0	1.49955	98.7988	0.994441	1.002	0	0.749777	0.987988	-25.3158	-1.14331	163.06	0.270642	285.22	88.95	41.1592	0.0169571	0.000956333	0.215098	0.926563	0.411592	-68.5767	-0.370743	0.265005	10.36	82	0.0136426	1.09141
02-BUFFER	Churriana de la Vega	18062																			99.8128	sin dato	0	1.51273	100	0.998128	sin dato	0	0.756364	1	-31.1377	-1.287	0	0	130.209	83.3	75.4287	0	0	0.0981971	0.867708	0.754287	-65.5962	-0.361158	0.18061	4.84	77	0.1374	0.618302
02-BUFFER	Dúdar	18070																			100	99.8498	0	1.97658	3.45599	1	1.0005	0	0.988292	0.0345599	-39.533	-1.49422	1260.73	31.9881	14.5167	68.91	64.1946	0.131107	0.113032	0.0109477	0.717812	0.641946	-67.7031	-0.367934	0.176897	26.97	60	0.309598	0
02-BUFFER	Gójar	18084																			99.7492	99.9733	7.68142	1.79398	31.8331	0.997492	1.00174	0.451848	0.896992	0.318331	-26.672	-1.17678	927.049	13.5184	956.862	83.99	46.6333	0.096407	0.0477681	0.721616	0.874896	0.466333	-55.8596	-0.329846	0.487936	21.58	78	0.017838	0.535141
02-BUFFER	Gor	18085																			99.9963	99.9851	46.2025	1.98465	60.3121	0.999963	1.00185	2.71779	0.992323	0.603121	26.3011	0.13069	1180.55	59.4162	1693.49	69.33	96.7733	0.12277	0.209951	1.27714	0.722187	0.967733	-34.0043	-0.25956	0.0632036	6.3	4	0.536193	1.34048
02-BUFFER	Granada	18087																			99.6594	99.0127	5.51662	1.67069	91.5901	0.996594	0.992111	0.324507	0.835346	0.915901	-18.7108	-0.980286	1933.82	25.7436	77.6112	80.17	-2.67232	0.201104	0.0909667	0.0585303	0.835104	-0.0267232	-76.8204	-0.397255	0.232295	11.22	63	0.491472	0.945139
02-BUFFER	Guadix	18089																			99.9425	99.9594	0.018181	1.96692	66.0233	0.999425	1.0016	0.00106947	0.983462	0.660233	-27.0843	-1.18696	494.491	34.9453	3892.71	77.56	61.2165	0.0514237	0.123482	2.93568	0.807917	0.612165	-9.38669	-0.180391	0.228028	12.45	59	0.675568	1.22347
02-BUFFER	Huétor Vega	18101																			99.8231	100	0	1.43034	87.2555	0.998231	1.002	0	0.715172	0.872555	-28.2408	-1.2155	64.1445	2.14218	71.6896	82.24	99.8022	0.00667061	0.00756954	0.0540645	0.856667	0.998022	-61.5401	-0.348114	0.0599428	8	78	0.168011	0.756048
02-BUFFER	La Calahorra	18114																			99.6714	100	4.31423	1.93753	98.258	0.996714	1.002	0.253778	0.968763	0.98258	-15.9232	-0.911483	261.477	7.57085	4061.48	86.3	77.1975	0.0271919	0.0267521	3.06296	0.898958	0.771975	-4.24327	-0.16385	0.125106	43.99	31	0.148588	1.48588
02-BUFFER	Lobras	18121																			100	99.7521	0	1.99819	14.1826	1	0.99952	0	0.999096	0.141826	-37.1911	-1.43641	1219.06	68.9068	10511.7	96.87	100	0.126775	0.243487	7.92739	1.00906	1	106.134	0.191118	0.0872241	34.92	1	1.35135	6.75676
02-BUFFER	Marchal	18128																			99.9978	99.9998	0.666764	1.98357	76.1939	0.999978	1.002	0.0392214	0.991784	0.761939	-24.1015	-1.11334	1383.6	35.4005	2575.69	61.72	100	0.143885	0.12509	1.94245	0.642917	1	-22.9132	-0.223892	0.21137	1.46	18	0.239808	0
02-BUFFER	Murtas	18141																			100	99.8124	0	1.9919	8.44248	1	1.00012	0	0.99595	0.0844248	-38.39	-1.46601	1847.79	60.4777	467.558	53.55	95.5799	0.192157	0.213702	0.352608	0.557812	0.955799	-54.5584	-0.325661	0.0832749	0	32	0.422833	4.22833
02-BUFFER	Ogíjares	18145																			99.1062	sin dato	0	1.28246	100	0.991062	sin dato	0	0.641228	1	-34.1927	-1.36241	0	0	304.203	84.87	65.475	0	0	0.229414	0.884063	0.65475	-64.6355	-0.358069	0.188985	23.22	84	0.00722126	0.866551
02-BUFFER	Órgiva	18147																			99.9809	99.9308	0.185024	1.98839	74.4286	0.999809	1.00131	0.0108838	0.994196	0.744286	-24.9903	-1.13528	2107.63	109.243	5596.83	71.4	73.8809	0.21918	0.386018	4.22084	0.74375	0.738809	26.1719	-0.0660367	0.185284	12.46	52	0.394973	0.897666
02-BUFFER	Villa de Otura	18149																			99.6349	99.9972	0	1.75544	52.3442	0.996349	1.00198	0	0.877721	0.523442	-32.0103	-1.30854	152.202	7.93377	1181.31	81.41	-66.5298	0.015828	0.0280345	0.890885	0.848021	-0.665298	-77.6506	-0.399925	0.436002	28.87	75	0.014637	0.43911
02-BUFFER	Padul	18150																			99.8436	99.9364	15.7096	1.92098	97.3784	0.998436	1.00137	0.924092	0.960491	0.973784	-2.83663	-0.588482	1268.09	78.6702	714.439	64.29	86.0348	0.131872	0.277987	0.538793	0.669687	0.860348	-50.4262	-0.312372	0.277671	20.36	65	0.0118287	0.709723
02-BUFFER	La Peza	18154																			99.9856	99.9893	7.09037	1.99251	85.7064	0.999856	1.0019	0.417081	0.996256	0.857064	-14.5569	-0.877761	2728.97	64.6264	693.944	49.58	92.9861	0.283795	0.228362	0.523336	0.516458	0.929861	-50.3638	-0.312172	0.102064	8.71	46	0.164745	0.823723
02-BUFFER	Pinos Genil	18157																			99.9225	97.082	0.00870725	1.92758	18.3531	0.999225	0.972766	0.000512191	0.963791	0.183531	-37.6035	-1.44659	1935.64	42.0634	14.4148	88.85	88.3924	0.201294	0.148634	0.0108709	0.925521	0.883924	-56.5951	-0.332211	0.277966	29.8	79	0.0703235	0.703235
02-BUFFER	Polícar	18161																			100	100	0	1.97394	100	1	1.002	0	0.98697	1	-20.2205	-1.01755	573	19.9794	14.7477	66.36	94.5868	0.0595882	0.0705987	0.0111219	0.69125	0.945868	-64.4315	-0.357413	0.184467	24.37	33	0.438596	0
02-BUFFER	Quéntar	18168																			99.9723	99.9721	45.2084	1.99094	73.327	0.999723	1.00172	2.65932	0.99547	0.73327	27.7901	0.167441	2818.34	69.0367	14.9747	86.8	81.054	0.293089	0.243946	0.0112932	0.904167	0.81054	-54.7393	-0.326243	0.111382	0	58	0.107759	1.07759
02-BUFFER	Torvizcón	18179																			100	99.8492	0	1.99838	29.4664	1	1.00049	0	0.999191	0.294664	-34.113	-1.36044	2269.5	56.9385	926.785	36.66	100	0.236013	0.201196	0.698933	0.381875	1	-49.6397	-0.309843	0.107495	14.59	30	0.153846	3.07692
02-BUFFER	Ugíjar	18182																			99.9867	99.919	0	1.9867	30.9033	0.999867	1.00119	0	0.993349	0.309033	-33.9312	-1.35595	1131.4	44.3799	10757.7	68.25	41.7943	0.117659	0.156819	8.11293	0.710938	0.417943	90.3258	0.140279	0.179488	17.07	43	0.876145	1.99124
02-BUFFER	Vélez de Benaudalla	18184																			99.7392	99.9377	0	1.94519	52.2809	0.997392	1.00138	0	0.972593	0.522809	-30.1165	-1.2618	1753.11	81.5774	240.1	76.34	82.0649	0.182312	0.288259	0.181071	0.795208	0.820649	-54.65	-0.325956	0.172195	35.97	55	0.034662	1.03986
02-BUFFER	El Valle	18902																			100	99.7391	0	1.99477	54.2506	1	0.99939	0	0.997386	0.542506	-29.2144	-1.23953	2662.62	36.3295	436.944	44.59	37.2025	0.276895	0.128373	0.329521	0.464479	0.372025	-68.5742	-0.370735	0.18781	0.12	27	0.319829	0
02-BUFFER	Las Gabias	18905																			99.6161	100	11.7644	1.75068	31.2011	0.996161	1.002	0.692026	0.875341	0.312011	-22.4491	-1.07256	340.424	3.47733	1144.87	88.31	81.006	0.0354018	0.0122874	0.863401	0.919896	0.81006	-47.1791	-0.30193	0.504309	9.19	79	0.0147572	0
02-BUFFER	Los Guajares	18906																			100	99.6732	0	1.99771	59.4515	1	0.99873	0	0.998856	0.594515	-28.158	-1.21346	3637.26	47.6825	465.586	45.27	95.0585	0.378251	0.16849	0.351121	0.471563	0.950585	-53.5998	-0.322579	0.102563	34.25	25	0.289296	0
02-BUFFER	Valle del Zalabí	18907																			99.9685	99.9957	54.4711	1.97994	82.4101	0.999685	1.00196	3.20418	0.989972	0.824101	40.398	0.478628	1493.33	42.3309	1955.85	82.56	47.3875	0.155296	0.149579	1.475	0.86	0.473875	-37.7249	-0.271526	0.132353	7.55	44	0	0
02-BUFFER	Villamena	18908																			99.6833	99.9011	0.0115691	1.94514	61.5525	0.996833	1.00101	0.000680534	0.972568	0.615525	-28.2676	-1.21617	2187	42.864	371.778	55.53	91.0569	0.227433	0.151463	0.280376	0.578438	0.910569	-57.0344	-0.333624	0.203352	14.02	43	0.206825	0
02-BUFFER	El Pinar	18910																			99.9513	99.6807	0.293601	1.95862	42.4123	0.999513	0.998804	0.0172706	0.979309	0.424123	-31.6196	-1.2989	3314.6	50.2607	4221.2	58.51	83.2483	0.344696	0.177599	3.18341	0.609479	0.832483	2.95332	-0.140706	0.146735	2.12	40	0	0
02-BUFFER	Bollullos Par del Condado	21013																			99.8315	99.6301	0.0381683	1.90786	100	0.998315	0.998298	0.0022452	0.953932	1	-20.9442	-1.03541	976.961	5.5088	0	84.77	3.73726	0.101597	0.0194657	0	0.883021	0.0373726	-79.1709	-0.404814	0.441537	11.56	57	0.141894	0.922313
02-BUFFER	Bonares	21014																			99.8882	99.4918	26.4845	1.95512	94.7522	0.998882	0.996912	1.55791	0.977561	0.947522	9.57581	-0.282121	4421.14	80.4072	6.98624	68.12	100	0.45977	0.284124	0.00526866	0.709583	1	-50.8251	-0.313655	0.275006	0	64	0.33195	0.829876
02-BUFFER	Chucena	21030																			99.9704	68.8927	0.548698	1.94449	100	0.999704	0.690307	0.0322764	0.972246	1	-26.1093	-1.1629	592.861	1.30536	8.16475	97.85	83.3709	0.0616535	0.00461259	0.00615743	1.01927	0.833709	-61.4919	-0.347959	0.258807	24.19	53	0.0443262	1.32979
02-BUFFER	Escacena del Campo	21032																			99.9925	94.334	38.202	1.99437	98.8392	0.999925	0.945231	2.24718	0.997183	0.988392	23.5582	0.0629892	2696.35	138.545	14.8692	66.43	32.5243	0.280402	0.489559	0.0112136	0.691979	0.325243	-64.0321	-0.356128	0.11617	0.12	54	0.0443656	0.887311
02-BUFFER	Lucena del Puerto	21046																			99.9837	99.4189	22.7986	1.98991	91.118	0.999837	0.996181	1.3411	0.994954	0.91118	4.86494	-0.398394	4570.42	89.9784	4647.43	77.79	71.5438	0.475294	0.317945	3.50485	0.810312	0.715438	16.4768	-0.0972155	0.191669	0	68	0.03125	0.9375
02-BUFFER	Manzanilla	21047																			99.9265	98.6956	0.104503	1.97074	100	0.999265	0.988934	0.00614721	0.985372	1	-20.4056	-1.02212	1878.03	121.607	10.369	55.71	23.9948	0.195303	0.429708	0.00781977	0.580313	0.239948	-70.9382	-0.378338	0.218486	0.7	55	0.0481696	1.44509
02-BUFFER	Moguer	21050																			99.8773	99.2109	36.7493	1.94498	95.7387	0.998773	0.994097	2.16172	0.97249	0.957387	21.6894	0.0168657	3391.57	33.3647	30544.5	76.18	71.4842	0.352701	0.117897	0.102087	0.793542	0.714842	-58.3786	-0.337947	0.294238	8.05	78	0.0976109	0.371851
02-BUFFER	La Palma del Condado	21054																			99.8545	99.3459	1.27775	1.92719	100	0.998545	0.99545	0.0751616	0.963596	1	-19.345	-0.995938	1751.89	9.54991	18.0533	78.14	20.3143	0.182185	0.0337453	0.0136149	0.813958	0.203143	-75.0671	-0.391616	0.364714	0.86	63	0.187091	0.935454
02-BUFFER	Palos de la Frontera	21055																			99.4346	99.728	26.9646	1.66529	100	0.994346	0.999279	1.58615	0.832646	1	8.24849	-0.314882	515.578	14.8629	101531	79.91	80.7248	0.0536167	0.052519	0.339342	0.832396	0.807248	-58.2976	-0.337686	0.381264	7.68	78	0.183739	0.826826
02-BUFFER	Paterna del Campo	21056																			99.995	99.6264	2.64405	1.99239	93.3805	0.99995	0.998261	0.155533	0.996196	0.933805	-18.3251	-0.970767	11689.8	118.699	13.4247	82.93	100	1.21566	0.419429	0.0101242	0.863854	1	-29.8186	-0.246099	0.149767	3.95	52	0.0285796	1.14318
02-BUFFER	Rociana del Condado	21061																			99.8083	99.8509	12.6037	1.94232	100	0.998083	1.00051	0.741396	0.971161	1	-5.777	-0.661056	7824.19	30.7831	0	51.63	92.2109	0.813664	0.108774	0	0.537813	0.922109	-52.3528	-0.318568	0.289014	2.59	59	0.0129634	0.648172
02-BUFFER	Villalba del Alcor	21074																			99.9787	99.9107	2.13636	1.9742	100	0.999787	1.00111	0.125668	0.987102	1	-17.7267	-0.955996	3982.89	35.7752	17.2747	76.03	100	0.414194	0.126414	0.0130277	0.791979	1	-53.0877	-0.320932	0.211708	15.2	58	0.0304971	1.52486
02-BUFFER	Benasque	22054																			99.9956	99.9995	78.5213	1.9929	100	0.999956	1.002	4.6189	0.996451	1	72.3461	1.26716	3690.25	835.487	70.0708	88.14	-51.5225	0.383761	2.95225	0.0528437	0.918125	-0.515225	-24.1649	-0.227917	0.0883102	41.82	78	0.0942951	2.35738
02-BUFFER	Biescas	22059																			99.9857	99.9971	52.6726	1.99248	96.8775	0.999857	1.00198	3.09839	0.996241	0.968775	41.3047	0.501007	9420.96	2233.5	83.9653	93.77	100	0.979717	7.89224	0.0633223	0.976771	1	118.241	0.230053	0.0823963	73.69	35	1.55405	2.02703
02-BUFFER	Boltaña	22066																			99.9818	99.9993	58.0011	1.99286	77.0552	0.999818	1.002	3.41183	0.996432	0.770552	43.6125	0.557968	8638.43	119.763	262.125	94.07	51.002	0.898339	0.423189	0.197681	0.979896	0.51002	-39.8175	-0.278255	0.078272	40.77	46	0.10627	2.1254
02-BUFFER	Bonansa	22067																			100	100	81.4397	1.9958	95.2818	1	1.002	4.79057	0.9979	0.952818	74.8658	1.32936	5957.97	206.497	222.237	79.49	100	0.619589	0.72967	0.167599	0.828021	1	-33.1024	-0.25666	0.0464095	40	48	1.26582	0
02-BUFFER	Fiscal	22109																			99.986	99.9998	13.5634	1.98842	95.0257	0.99986	1.002	0.797846	0.99421	0.950257	-5.11651	-0.644754	11682.5	283.852	193.143	98.04	72.9545	1.2149	1.00301	0.145658	1.02125	0.729545	-17.7127	-0.207167	0.0390034	55.65	40	0.309598	3.09598
02-BUFFER	Gistaín	22114																			100	99.9992	81.0028	1.99918	100	1	1.002	4.76487	0.999591	1	75.3292	1.34079	3528.44	1676.88	292.589	90.14	54.0438	0.366934	5.92538	0.220655	0.938958	0.540438	59.8472	0.0422615	0.0390454	2.9	18	0.704225	0
02-BUFFER	Hoz de Jaca	22122																			100	100	82.0966	1.99371	100	1	1.002	4.82921	0.996855	1	76.5614	1.37121	7284.58	1487.02	150.629	95.35	100	0.757548	5.25447	0.113596	0.993229	1	62.3769	0.050397	0.0679878	52.5	50	1.31579	0
02-BUFFER	Labuerda	22133																			100	100	0.0264481	1.99482	100	1	1.002	0.00155577	0.997408	1	-19.9807	-1.01163	14294.5	136.308	1683.42	91.18	-10.4274	1.48653	0.481653	1.26955	0.949792	-0.104274	-18.335	-0.209169	0.0829098	38.6	17	0.636943	0
02-BUFFER	Laspaúles	22143																			100	99.1476	43.6774	1.99573	82.8046	1	0.993463	2.56926	0.997864	0.828046	27.7727	0.167011	6414.15	862.552	235.118	95.04	87.0824	0.667028	3.04789	0.177314	0.99	0.870824	15.061	-0.101769	0.0554021	37.24	32	0.409836	0
02-BUFFER	Laspuña	22144																			100	99.9936	47.7026	1.99584	97.9411	1	1.00194	2.80603	0.997918	0.979411	35.706	0.362821	12492.1	306.836	394.313	88.35	69.8199	1.29909	1.08423	0.297371	0.920312	0.698199	-14.016	-0.195279	0.0720701	22.95	31	0.355872	0
02-BUFFER	Montanuy	22157																			100	99.0584	23.7849	1.99738	99.9836	1	0.992569	1.39911	0.99869	0.999836	7.80419	-0.325848	5019.01	2224.75	172.206	87.1	100	0.521944	7.8613	0.129869	0.907292	1	108.408	0.198431	0.0346957	14.29	26	1.36364	4.54545
02-BUFFER	Panticosa	22170																			99.9667	100	60.2762	1.99003	100	0.999667	1.002	3.54566	0.995015	1	50.8468	0.736523	2267.98	2203.93	198.217	83.13	-50.5303	0.235855	7.78775	0.149485	0.865937	-0.505303	70.6745	0.0770814	0.0813977	72.19	61	0.125786	1.25786
02-BUFFER	Plan	22182																			100	100	90.529	1.99733	100	1	1.002	5.32523	0.998666	1	86.5181	1.61695	8480.71	590.509	221.629	94.35	67.3265	0.881937	2.0866	0.167141	0.982812	0.673265	-4.16482	-0.163598	0.0520621	13.66	40	1.0453	3.48432
02-BUFFER	El Pueyo de Araguás	22190																			99.9991	100	47.2896	1.99413	95.2192	0.999991	1.002	2.78174	0.997065	0.952192	34.6598	0.336999	9789.07	741.48	640.511	100	100	1.018	2.62007	0.48304	1.04167	1	23.2555	-0.0754156	0.0442432	20.31	41	0	0
02-BUFFER	Sabiñánigo	22199																			99.9759	99.9952	18.9528	1.98591	88.256	0.999759	1.00196	1.11487	0.992956	0.88256	-0.15802	-0.522369	5412.72	353.287	67.7467	92.77	65.3846	0.562887	1.24837	0.051091	0.966354	0.653846	-30.3491	-0.247806	0.125111	12.56	52	0.237735	0.972552
02-BUFFER	Sallent de Gállego	22204																			99.9717	99.9985	31.7512	1.98156	100	0.999717	1.00199	1.86772	0.990782	1	17.2041	-0.0938409	2568.98	6037.4	133.478	86.56	100	0.267156	21.3336	0.100662	0.901667	1	372.061	1.04633	0.087839	64.69	72	0.34626	0.692521
02-BUFFER	San Juan de Plan	22207																			100	99.9998	99.74	1.99926	100	1	1.002	5.86706	0.99963	1	97.3738	1.88489	4185.45	761.479	100.701	96.97	-32.3145	0.435259	2.69074	0.0759438	1.0101	-0.323145	-22.222	-0.221669	0.0478927	3.57	35	0.704225	0
02-BUFFER	Yebra de Basa	22252																			100	99.9924	39.0358	1.97865	88.6131	1	1.00193	2.29622	0.989325	0.886131	23.4721	0.0608652	7754.31	420.778	54.5359	94.12	100	0.806397	1.48685	0.0411282	0.980417	1	-13.7042	-0.194276	0.0362918	4.48	46	0	0
02-BUFFER	Yésero	22253																			100	100	85.4765	1.99846	100	1	1.002	5.02803	0.999229	1	80.5853	1.47052	12881.1	2194.03	157.84	91.67	100	1.33955	7.75275	0.119035	0.954896	1	123.324	0.246401	0.0422336	52.17	33	1.78571	0
02-BUFFER	Aínsa-Sobrarbe	22907																			99.9922	99.9959	25.3601	1.99298	74.7413	0.999922	1.00196	1.49177	0.996488	0.747413	4.75108	-0.401204	7008.44	103.905	760.098	94.6	57.485	0.728831	0.367155	0.573226	0.985417	0.57485	-35.4104	-0.264082	0.0797605	32.21	41	0.986842	2.34962
02-BUFFER	Acebedo	24001																			100	99.9616	100	1.99194	100	1	1.00162	5.88235	0.995968	1	97.5988	1.89045	8721.31	138.222	20.8995	92.86	100	0.906958	0.488416	0.0157613	0.967292	1	-32.4315	-0.254502	0.0641188	3.26	-10	1.46341	0
02-BUFFER	Boca de Huérgano	24020																			99.989	99.8748	99.9979	1.99498	100	0.99989	1.00075	5.88223	0.997488	1	97.6071	1.89065	6066.92	1296.31	21.4775	84.23	89.0604	0.630919	4.58059	0.0161972	0.877396	0.890604	39.9141	-0.0218425	0.0379631	53.33	1	1.91489	0
02-BUFFER	Burón	24025																			100	99.9498	100	1.99623	100	1	1.0015	5.88235	0.998117	1	97.6394	1.89145	15233.3	462.653	21.2844	87.5	100	1.58416	1.63481	0.0160516	0.911458	1	2.92966	-0.140783	0.0424681	1.17	-5	1.53846	0
02-BUFFER	Alins	25017																			100	99.9773	94.3171	1.99932	100	1	1.00178	5.54806	0.999658	1	90.99	1.72733	5834.79	262.412	167.012	94.5	71.4345	0.606779	0.927251	0.125952	0.984375	0.714345	-32.826	-0.255771	0.036135	29.32	25	1.3986	3.4965
02-BUFFER	Arres	25031																			100	100	55.4015	1.99836	100	1	1.002	3.25891	0.999181	1	45.2019	0.597197	12958.6	1834.99	212.985	100	100	1.34761	6.48407	0.160622	1.04167	1	100.679	0.173575	0.0658978	8	47	1.69492	0
02-BUFFER	Baix Pallars	25039																			100	99.7762	56.8347	1.99818	91.7474	1	0.999762	3.34322	0.999092	0.917474	45.1909	0.596924	7764.5	601.532	301.949	88.39	-2.05873	0.807456	2.12556	0.227714	0.920729	-0.0205873	-18.7826	-0.210608	0.0473157	1.13	34	0.879765	0
02-BUFFER	Es Bòrdes	25057																			100	100	76.0886	1.99621	100	1	1.002	4.4758	0.998105	1	69.5182	1.19737	11069.9	3875.86	155.32	94.44	100	1.1512	13.6956	0.117134	0.98375	1	238.954	0.618261	0.093925	39.06	67	0.396825	3.96825
02-BUFFER	Bossòst	25059																			99.9663	99.0924	58.9442	1.98413	100	0.999663	0.99291	3.46731	0.992064	1	49.0389	0.6919	13261.3	1453.43	234.325	94.62	100	1.37909	5.13581	0.176715	0.985625	1	73.5449	0.0863125	0.182445	3.14	65	0.0892857	2.67857
02-BUFFER	Canejan	25063																			100	99.8489	89.8351	1.99856	100	1	1.00049	5.28442	0.999282	1	85.6837	1.59636	8381.22	3098.56	120.84	89.13	100	0.871591	10.949	0.0911313	0.928437	1	176.803	0.418385	0.0426132	10.68	31	1.13636	0
02-BUFFER	Esterri de Cardós	25087																			100	100	78.2909	1.99719	100	1	1.002	4.60535	0.998597	1	72.119	1.26156	7008.38	812.999	319.838	93.55	42.7812	0.728825	2.87279	0.241205	0.974479	0.427812	4.90221	-0.134439	0.059792	50	37	0	0
02-BUFFER	Farrera	25089																			100	99.994	49.532	2	100	1	1.00194	2.91364	1	1	38.3118	0.427135	8544.9	1314.51	373.758	77.78	100	0.888612	4.64492	0.281869	0.810208	1	52.5122	0.0186723	0.041565	0	60	0	0
02-BUFFER	Les	25121																			99.9533	99.3278	87.6213	1.9804	100	0.999533	0.995268	5.15419	0.990201	1	82.7839	1.52479	12151.9	1926.3	234.981	95.61	100	1.26371	6.8067	0.17721	0.995938	1	104.871	0.187056	0.185854	0	61	0.104712	3.14136
02-BUFFER	Lladorre	25123																			100	99.9583	86.9797	2	100	1	1.00159	5.11645	1	1	82.3607	1.51434	3449.43	504.805	294.589	89.8	100	0.358717	1.78376	0.222164	0.935417	1	-13.9988	-0.195224	0.036174	11.01	49	0.888889	0
02-BUFFER	Llavorsí	25126																			100	99.9937	63.5841	1.99828	100	1	1.00194	3.74024	0.999138	1	54.8264	0.834747	11125.4	1084.32	294.435	91.07	30.8666	1.15696	3.83152	0.222047	0.948646	0.308666	29.3569	-0.0557937	0.0646197	43.3	34	0.278552	5.57103
02-BUFFER	Montferrer i Castellbò	25140																			99.9522	99.9997	17.5403	1.98475	96.0245	0.999522	1.002	1.03178	0.992377	0.960245	-0.281466	-0.525416	9479.19	451.746	169.656	92.26	100	0.985773	1.59628	0.127946	0.961042	1	-6.57924	-0.171363	0.0678139	35.04	55	0.0915751	2.74725
02-BUFFER	Conca de Dalt	25161																			99.9997	99.9754	49.5562	1.99788	56.9789	0.999997	1.00176	2.91507	0.998939	0.569789	29.7111	0.214854	6255.54	175.763	174.814	96.89	100	0.650534	0.621069	0.131836	1.00927	1	-31.7458	-0.252297	0.0456715	0	21	0	0
02-BUFFER	La Pobla de Segur	25171																			99.9701	99.9851	53.733	1.96373	93.6343	0.999701	1.00185	3.16076	0.981865	0.936343	41.6106	0.508555	5391.11	267.58	355.839	94.86	65.3773	0.560639	0.945513	0.268355	0.988125	0.653773	-31.6719	-0.252059	0.272678	26.47	30	0.678196	1.01729
02-BUFFER	El Pont de Suert	25173																			99.9913	99.8501	15.7757	1.99384	94.3785	0.999913	1.0005	0.927984	0.996919	0.943785	-2.61795	-0.583085	5947.57	1119.3	428.453	91.63	-50.3224	0.618508	3.95511	0.323117	0.954479	-0.503224	6.95986	-0.127822	0.117891	27.11	50	0.971302	1.3245
02-BUFFER	Rialp	25183																			100	99.9944	49.2739	1.995	100	1	1.00195	2.89847	0.997498	1	37.9583	0.41841	8688.74	1043.6	511.16	94.19	59.6283	0.903571	3.68763	0.385491	0.981146	0.596283	31.0825	-0.0502444	0.0924168	48.43	61	0.15015	3.003
02-BUFFER	Sarroca de Bellera	25201																			99.9999	99.9985	0.15564	1.99784	100	0.999999	1.00199	0.00915532	0.998922	1	-19.7987	-1.00714	4703.18	2512.51	619.764	94	88.8333	0.489099	8.87812	0.467394	0.979167	0.888333	134.042	0.280869	0.0343601	46.77	7	0	0
02-BUFFER	Senterada	25202																			100	99.9972	0.0387413	1.99853	96.2908	1	1.00198	0.0022789	0.999265	0.962908	-20.6714	-1.02868	5798.59	961.968	463.93	93.02	97.0412	0.603015	3.39918	0.349872	0.968958	0.970412	25.8287	-0.0671402	0.0560992	62.5	37	0.735294	0
02-BUFFER	Soriguera	25208																			100	99.8344	79.0465	2	93.9996	1	1.00034	4.6498	1	0.939996	71.8027	1.25375	9367.02	531.919	204.264	95.71	32.4643	0.974108	1.87957	0.154045	0.996979	0.324643	-13.413	-0.19334	0.0524904	47.74	41	0	0
02-BUFFER	Tírvia	25221																			100	99.9999	7.23925	2	100	1	1.002	0.425838	1	1	-11.4432	-0.800908	10379.7	61.073	940.424	87.23	90.6454	1.07942	0.215806	0.709219	0.908646	0.906454	-23.6091	-0.22613	0.119105	56.06	49	0.70922	7.0922
02-BUFFER	Vilamòs	25247																			100	99.9995	69.153	1.99372	100	1	1.002	4.06783	0.996858	1	61.3337	0.995357	11170.7	3081.87	165.793	100	100	1.16168	10.89	0.125033	1.04167	1	184.368	0.442713	0.0983082	37.78	66	0.662252	0
02-BUFFER	Vall de Cardós	25901																			100	99.9942	51.3248	1.99666	100	1	1.00195	3.0191	0.998332	1	40.3876	0.478371	7781.29	409.408	557.067	94.7	13.3378	0.809203	1.44667	0.420111	0.986458	0.133378	-24.0836	-0.227656	0.0760479	59	40	0.277778	0
02-BUFFER	Alpedrete	28010																			99.4211	99.7565	32.5405	1.52702	100	0.994211	0.999564	1.91415	0.763509	1	13.4286	-0.187026	2852.62	376.811	2250.01	90.37	99.9697	0.296653	1.33149	1.69684	0.941354	0.999697	5.32061	-0.133093	0.430015	46.05	81	0.00702247	1.33427
02-BUFFER	Braojos	28024																			100	99.992	41.2266	1.99723	100	1	1.00192	2.42509	0.998613	1	28.5126	0.185274	11164	113.569	333.98	94.2	99.9303	1.16098	0.401305	0.251871	0.98125	0.999303	-24.1058	-0.227727	0.0798527	75.73	53	0.480769	0
02-BUFFER	Buitrago del Lozoya	28027																			99.8947	99.9926	32.0937	1.90213	100	0.998947	1.00193	1.88787	0.951066	1	16.7962	-0.103909	7814.16	1484.13	555.414	90.03	84.9909	0.812621	5.24427	0.418864	0.937813	0.849909	65.2696	0.0596995	0.246079	32.21	65	1.07875	4.31499
02-BUFFER	Bustarviejo	28028																			99.8848	99.6383	70.4482	1.95931	90.6615	0.998848	0.99838	4.14401	0.979655	0.906615	60.5502	0.97602	6537.46	237.213	2149.6	87.75	63.2457	0.679852	0.838208	1.62112	0.914062	0.632457	-6.28606	-0.17042	0.178781	67.15	55	0.041684	0.833681
02-BUFFER	La Cabrera	28030																			99.81	99.9854	0	1.83603	82.1709	0.9981	1.00186	0	0.918015	0.821709	-25.2064	-1.14061	3611.03	392.774	2860.7	86.47	99.9371	0.375523	1.38789	2.15739	0.900729	0.999371	16.4182	-0.0974042	0.29683	61.86	70	0.77821	1.94553
02-BUFFER	Colmenar Viejo	28045																			99.8784	99.9262	30.7061	1.90183	99.8088	0.998784	1.00126	1.80624	0.950913	0.998088	15.1058	-0.14563	1920.42	2428.37	2350.58	89.68	99.1151	0.199711	8.58082	1.77269	0.934167	0.991151	149.571	0.330808	0.446063	13.79	76	0.0822808	0.678817
02-BUFFER	Collado Mediano	28046																			99.7956	99.8488	8.8711	1.81559	100	0.997956	1.00049	0.521829	0.907796	1	-11.4386	-0.800794	5369.79	902.158	1907.09	90.24	67.1441	0.558422	3.18784	1.43823	0.94	0.671441	35.9185	-0.0346921	0.442411	40.43	78	0.0150015	0.750075
02-BUFFER	Collado Villalba	28047																			99.6445	99.8573	41.7301	1.54583	100	0.996445	1.00057	2.45471	0.772914	1	24.4929	0.0860589	2176.96	329.242	1242.15	88.16	2.73218	0.226389	1.1634	0.936764	0.918333	0.0273218	-34.5559	-0.261334	0.134136	23.22	82	0.257433	0.643583
02-BUFFER	El Escorial	28054																			99.6847	99.7485	0.416193	1.84849	99.4835	0.996847	0.999484	0.0244819	0.924244	0.994835	-21.2022	-1.04178	4291.82	147.677	1509.96	89.44	100	0.446321	0.521826	1.13873	0.931667	1	-19.229	-0.212044	0.401072	46.3	73	0.0128518	0.385555
02-BUFFER	Galapagar	28061																			99.6061	99.4883	50.3731	1.74558	98.5257	0.996061	0.996876	2.96313	0.87279	0.985257	36.2822	0.377041	3114.02	416.143	701.046	91.9	32.7055	0.323837	1.47047	0.528692	0.957292	0.327055	-27.8531	-0.239778	0.521555	25.41	84	0.0607847	0.547063
02-BUFFER	Garganta de los Montes	28062																			99.9709	99.8462	7.19761	1.97602	99.4431	0.999709	1.00046	0.423389	0.988012	0.994431	-11.8799	-0.811687	6325.83	1406.91	1283.48	90.84	8.11616	0.657844	4.97141	0.967932	0.94625	0.0811616	52.492	0.0186074	0.0885184	73.45	35	0.60423	0
02-BUFFER	Gargantilla del Lozoya y Pinilla de Buitrago	28063																			99.85	99.928	13.2259	1.95857	100	0.9985	1.00128	0.777992	0.979287	1	-4.85878	-0.638393	5165.26	1344.21	497.818	84.25	100	0.537153	4.74988	0.375429	0.877604	1	50.8012	0.0131701	0.110443	81.84	42	0.634921	0
02-BUFFER	Gascones	28064																			99.9462	99.9979	49.6346	1.98089	100	0.999462	1.00198	2.91968	0.990445	1	38.2314	0.425152	11196.5	115.107	425.214	92.31	100	1.16437	0.406738	0.320674	0.961562	1	-22.9332	-0.223956	0.0870784	66.43	60	0.568182	0
02-BUFFER	Guadalix de la Sierra	28067																			99.9348	99.9399	8.47703	1.94184	100	0.999348	1.0014	0.498649	0.970919	1	-10.5936	-0.779939	2930.84	1311.71	4623.23	90.86	97.4631	0.304788	4.635	3.4866	0.946458	0.974631	106.95	0.193741	0.282023	54.67	70	0.0165317	0.991899
02-BUFFER	Hoyo de Manzanares	28072																			99.9235	99.9007	100	1.83702	100	0.999235	1.00101	5.88235	0.91851	1	96.0221	1.85153	2646.32	309.202	138.354	91.8	98.5994	0.275199	1.09258	0.10434	0.95625	0.985994	-31.7127	-0.25219	0.358601	45.32	78	0.0124502	0.498008
02-BUFFER	Moralzarzal	28090																			99.7923	99.9561	74.9388	1.87252	100	0.997923	1.00156	4.40817	0.936261	1	66.8783	1.13221	4124.71	900.343	703.532	89.61	78.326	0.428942	3.18142	0.530567	0.933438	0.78326	17.1526	-0.0950423	0.435489	49.96	80	0.00800256	0.880282
02-BUFFER	Navalafuente	28094																			99.4993	98.84	0.000320328	1.87492	100	0.994993	0.990381	1.88428e-05	0.937459	1	-21.543	-1.05019	3775.84	216.411	4135.59	86.94	100	0.392662	0.764704	3.11885	0.905625	1	23.6368	-0.0741894	0.277768	78.77	62	0.0746269	0.746269
02-BUFFER	Pedrezuela	28108																			99.8478	99.6523	12.3027	1.87544	100	0.998478	0.99852	0.723688	0.937721	1	-6.83186	-0.687092	4406.84	1848.13	4375.93	87.59	89.0347	0.458282	6.53049	3.3001	0.912396	0.890347	141.832	0.305921	0.359673	42.81	73	0.0178158	1.2471
02-BUFFER	San Agustín del Guadalix	28129																			99.8698	99.841	39.135	1.88502	99.6911	0.998698	1.00041	2.30206	0.942509	0.996911	24.8118	0.0939309	3683.66	258.622	2973.09	89.08	100	0.383076	0.913859	2.24215	0.927917	1	9.34005	-0.120167	0.459716	5.82	86	0.00763184	0.610547
02-BUFFER	San Lorenzo de El Escorial	28131																			99.7658	99.9801	52.3036	1.85859	92.163	0.997658	1.0018	3.07668	0.929297	0.92163	38.5414	0.432803	13198.1	377.104	979.789	89.14	78.3838	1.37251	1.33252	0.738905	0.928542	0.783838	3.12637	-0.14015	0.461479	30.9	70	0.665779	0.887705
02-BUFFER	Santa María de la Alameda	28135																			99.9527	99.5723	2.77813	1.97291	98.241	0.999527	0.997718	0.163419	0.986455	0.98241	-17.4094	-0.948165	5521.59	1055.59	403.567	87.34	75.7013	0.574209	3.72999	0.304349	0.909792	0.757013	25.5071	-0.0681745	0.113776	75.3	44	0.343938	0.859845
02-BUFFER	La Serna del Monte	28138																			100	99.9483	0	1.9444	100	1	1.00149	0	0.972199	1	-20.5263	-1.0251	3157.12	2241.69	516.394	81.25	100	0.32832	7.92116	0.389437	0.846354	1	109.705	0.202603	0.121238	67.38	60	1.36986	0
02-BUFFER	Valdemanco	28158																			99.7443	98.155	0.000406235	1.92295	92.5809	0.997443	0.983517	2.38962e-05	0.961477	0.925809	-22.6346	-1.07713	4173.77	141.63	1999.44	92.67	76.4035	0.434045	0.50046	1.50788	0.965313	0.764035	-16.5654	-0.203478	0.203238	78.69	59	0.10917	1.0917
02-BUFFER	Villavieja del Lozoya	28182																			99.8769	99.958	40.4047	1.97066	100	0.998769	1.00158	2.37675	0.985328	1	27.2485	0.154073	10702.2	108.527	386.433	80	100	1.11295	0.383486	0.291427	0.833333	1	-27.576	-0.238887	0.0974669	48.62	15	0.374532	3.74532
02-BUFFER	Lozoyuela-Navas-Sieteiglesias	28901																			99.8355	99.9955	0	1.9317	97.4093	0.998355	1.00196	0	0.965848	0.974093	-21.1949	-1.0416	4919.91	1353.42	920.509	86.17	100	0.511638	4.78239	0.6942	0.897604	1	57.7166	0.0354095	0.135823	83.08	41	0.242522	2.42522
02-BUFFER	Caravia	33013																			99.9883	99.0351	9.55791	1.96267	100	0.999883	0.992336	0.56223	0.981333	1	-9.28437	-0.747625	44267.4	22.6312	900.56	80.69	98.1557	4.60352	0.079969	0.679155	0.840521	0.981557	43.6944	-0.00968529	0.177047	42.96	54	0.211864	0
02-BUFFER	Colunga	33019																			99.9645	99.6501	14.3423	1.95881	97.9101	0.999645	0.998498	0.843662	0.979406	0.979101	-3.99376	-0.617043	53095.3	153.6	2163.66	92.24	99.5589	5.52155	0.542755	1.63172	0.960833	0.995589	93.049	0.149037	0.175662	37.3	24	0.610465	0.581395
02-BUFFER	Llanes	33036																			99.7506	97.7971	4.97384	1.93205	99.4804	0.997506	0.979931	0.292579	0.966025	0.994804	-15.3831	-0.898153	18203.6	730.755	6624.89	87.13	61.5903	1.89305	2.58217	4.99615	0.907604	0.615903	119.898	0.235381	0.214398	31.43	40	0.167163	0.436078
02-BUFFER	Parres	33045																			99.9404	98.1466	9.26092	1.98041	98.3773	0.999404	0.983433	0.54476	0.990205	0.983773	-9.9685	-0.76451	20711.9	37.7712	1650.51	87.17	88.7489	2.1539	0.133467	1.24473	0.908021	0.887489	6.55221	-0.129133	0.194643	15.24	37	2.22676	0
02-BUFFER	Piloña	33049																			99.9651	97.8318	4.51499	1.98872	98.9513	0.999651	0.980279	0.265588	0.99436	0.989513	-15.4122	-0.89887	16465.7	104.653	1539.06	88.4	67.2396	1.71233	0.369799	1.16068	0.920833	0.672396	-3.27935	-0.16075	0.153936	12.06	26	0.292561	0
02-BUFFER	Ponga	33050																			100	99.5638	99.8903	1.99941	99.1243	1	0.997634	5.8759	0.999707	0.991243	97.2896	1.88282	17957.2	639.28	12.3334	81.14	-56.3861	1.86743	2.25894	0.00930119	0.845208	-0.563861	-11.6596	-0.187701	0.0520297	25.66	25	0.160514	0
02-BUFFER	Ribadedeva	33055																			99.7575	99.1789	5.68793	1.93686	99.8431	0.997575	0.993776	0.334584	0.96843	0.998431	-14.1441	-0.867571	28000	8.0414	2118.11	89.38	59.1317	2.91181	0.0284148	1.59737	0.931042	0.591317	21.199	-0.0820292	0.206641	20.62	42	0.0570451	0
02-BUFFER	Ribadesella	33056																			99.8069	97.4608	7.77888	1.93029	100	0.998069	0.976561	0.457581	0.965143	1	-12.0529	-0.815957	34827.1	21.4998	4282.22	88.56	99.4108	3.62179	0.0759709	3.22942	0.9225	0.994108	76.8758	0.0970245	0.244781	40.28	43	0.346081	0.692161
02-BUFFER	San Bartolomé	35018																			99.8686	100	31.8421	1.76236	100	0.998686	1.002	1.87306	0.881181	1	15.0987	-0.145807	152.036	6.40492	13811.9	90.46	48.6163	0.0158107	0.0226322	10.4162	0.942292	0.486163	137.663	0.292513	0.49341	14.36	88	0.115075	0.21919
02-BUFFER	Teguise	35024																			99.9359	100	50.9571	1.91059	100	0.999359	1.002	2.99747	0.955295	1	39.0826	0.446162	285.812	22.3876	6285.42	87.27	31.3104	0.0297225	0.0791081	4.74014	0.909062	0.313104	21.4227	-0.0813098	0.257671	28.21	80	0.105042	0
02-BUFFER	Tías	35028																			99.7012	100	29.9358	1.69757	100	0.997012	1.002	1.76093	0.848785	1	12.1746	-0.217978	274.639	9.6812	33932.4	87.74	53.744	0.0285606	0.0342092	0.113411	0.913958	0.53744	-67.4484	-0.367115	0.446699	21.89	85	0.606091	0.15027
02-BUFFER	Baiona	36003																			99.6741	98.0286	2.04605	1.85492	80.3957	0.996741	0.982251	0.120356	0.927458	0.803957	-23.3847	-1.09565	29386.9	87.8396	51817.9	92.74	99.9962	3.05604	0.310387	0.173188	0.966042	0.999962	10.1125	-0.117683	0.464394	34.58	70	0.164352	0.082176
02-BUFFER	Caldas de Reis	36005																			99.844	96.7796	0	1.93936	85.5465	0.99844	0.969736	0	0.969678	0.855465	-24.1336	-1.11413	39971	20.5104	855.251	88.15	90.6453	4.15672	0.0724751	0.644985	0.918229	0.906453	33.9773	-0.0409349	0.337491	7.85	59	0.203562	0.305344
02-BUFFER	Cambados	36006																			99.1428	99.3238	15.68	1.73462	100	0.991428	0.995229	0.922353	0.867309	1	-4.47362	-0.628886	9917.22	31.5356	56854.7	87.66	88.0809	1.03133	0.111433	0.190022	0.913125	0.880809	-37.4657	-0.270692	0.508433	8.13	66	0.143885	0.503597
02-BUFFER	Cangas	36008																			98.8036	99.0915	11.1339	1.68799	79.9529	0.988036	0.992901	0.654934	0.843996	0.799529	-14.4121	-0.874186	33451.4	51.6009	182265	87.84	46.8208	3.47873	0.182335	0.609174	0.915	0.468208	13.0689	-0.108175	0.511352	13.03	68	0.154775	0.302001
02-BUFFER	Catoira	36010																			99.6299	96.1421	0.665811	1.94121	95.9052	0.996299	0.963348	0.0391654	0.970607	0.959052	-21.4306	-1.04742	39001.4	52.8511	19973.8	85.2	-47.3182	4.05589	0.186753	15.0632	0.8875	-0.473182	294.403	0.796581	0.303686	4.28	56	0.599341	0
02-BUFFER	Gondomar	36021																			99.6025	98.9402	0.00117286	1.90862	77.9633	0.996025	0.991385	6.89919e-05	0.954308	0.779633	-25.5716	-1.14962	41421.3	71.0364	160.473	89.76	98.5247	4.30754	0.251012	0.12102	0.935	0.985247	31.9963	-0.0473055	0.378816	15.66	71	0.140519	0
02-BUFFER	O Grove	36022																			99.4276	99.7372	28.9638	1.70935	95.068	0.994276	0.99937	1.70375	0.854676	0.95068	10.0552	-0.27029	28016.9	73.058	144634	83.22	71.6536	2.91357	0.258155	0.483403	0.866875	0.716536	4.77071	-0.134862	0.503371	28.77	64	0.186116	0.651405
02-BUFFER	Marín	36026																			99.7744	99.6084	0	1.75038	64.2299	0.997744	0.99808	0	0.875191	0.642299	-29.7337	-1.25235	51000	50.5121	57024.4	88.57	93.2577	5.30367	0.178488	0.19059	0.922604	0.932577	50.5585	0.0123894	0.511015	7.28	68	0.0852377	0.243536
02-BUFFER	Meis	36028																			99.9064	97.6264	0	1.9505	88.3091	0.999064	0.978221	0	0.97525	0.883091	-23.2875	-1.09325	46984.8	21.5843	870.832	89.13	88.1456	4.8861	0.0762696	0.656736	0.928437	0.881456	48.5801	0.00602688	0.273633	8.82	52	0.856307	0
02-BUFFER	Moaña	36029																			99.1342	99.8265	0.0812953	1.73734	80.864	0.991342	1.00027	0.00478208	0.86867	0.80864	-26.526	-1.17318	51821.3	30.934	39402.7	86.07	73.2539	5.38907	0.109307	0.131694	0.896562	0.732539	45.1835	-0.00489634	0.509485	3.23	66	0.113175	0
02-BUFFER	Mos	36033																			99.0247	99.4311	0	1.79177	69.8219	0.990247	0.996304	0	0.895886	0.698219	-28.3869	-1.21911	25361.6	20.3499	333.195	86.57	39.1773	2.63744	0.0719077	0.251278	0.901771	0.391773	-14.9167	-0.198175	0.441238	4.58	67	0.13217	0
02-BUFFER	Nigrán	36035																			99.0168	99.7526	1.40082	1.5735	75.7644	0.990168	0.999525	0.0824013	0.786748	0.757644	-27.6703	-1.20142	23365.3	18.6045	54231	91.91	96.6502	2.42984	0.0657405	0.181253	0.957396	0.966502	-7.98544	-0.175885	0.507481	34.63	69	0.226989	0
02-BUFFER	Pazos de Borbén	36037																			99.5206	91.9418	0.255525	1.92302	84.3878	0.995206	0.92126	0.0150309	0.961512	0.843878	-25.2623	-1.14199	37454.8	30.9307	500.876	74.21	99.9996	3.89505	0.109296	0.377734	0.773021	0.999996	23.1018	-0.0759098	0.224831	17.7	49	0.668673	1.00301
02-BUFFER	O Porriño	36039																			99.5492	99.5913	6.40363	1.76823	87.2486	0.995492	0.997909	0.376684	0.884117	0.872486	-17.4662	-0.949568	26719.2	26.4533	353.107	87.74	99.6941	2.77862	0.0934746	0.266295	0.913958	0.996941	0.985772	-0.147034	0.44832	7.06	71	0.102041	0.357143
02-BUFFER	Portas	36040																			99.3576	99.5708	0	1.86988	80.4042	0.993576	0.997703	0	0.934939	0.804042	-25.3948	-1.14526	21354.6	15.9412	1053.97	91.1	77.0589	2.22074	0.0563292	0.794848	0.948958	0.770589	-4.1708	-0.163617	0.32134	6.4	45	0.66313	0
02-BUFFER	Ponteareas	36042																			99.761	98.6467	0.84855	1.94218	82.1885	0.99761	0.988444	0.0499147	0.97109	0.821885	-23.4211	-1.09655	35500.2	46.404	503.634	89.18	94.9336	3.69179	0.163972	0.379815	0.928958	0.949336	22.2773	-0.0785614	0.382358	13.62	63	0.0873629	0.480496
02-BUFFER	Redondela	36045																			98.7218	97.727	0.597476	1.68627	61.3436	0.987218	0.979229	0.0351457	0.843135	0.613436	-30.8367	-1.27958	28344	27.917	57580.6	86.62	85.6572	2.94759	0.0986465	0.192449	0.902292	0.856572	-0.0489854	-0.150362	0.518593	6.49	68	0.136091	0.204137
02-BUFFER	Ribadumia	36046																			99.4878	99.463	4.53888	1.89997	99.0098	0.994878	0.996623	0.266993	0.949984	0.990098	-16.0285	-0.914081	17401.7	25.6589	2113.21	85.75	100	1.80966	0.0906673	1.59367	0.893229	1	7.74456	-0.125298	0.421127	4.14	59	0.393623	0
02-BUFFER	Sanxenxo	36051																			98.9456	98.8987	7.05019	1.75631	88.842	0.989456	0.990969	0.414717	0.878156	0.88842	-16.7657	-0.932276	24896.9	43.6975	100507	86.79	53.6238	2.58912	0.154408	0.335918	0.904062	0.536238	-9.60515	-0.181094	0.483998	13.54	64	0.121803	0.0580013
02-BUFFER	Tui	36055																			99.3553	99.7728	21.076	1.86323	82.0587	0.993553	0.999727	1.23976	0.931617	0.820587	-0.295072	-0.525752	27528.9	43.3031	681.32	89.95	99.9997	2.86282	0.153014	0.513816	0.936979	0.999997	9.33254	-0.120191	0.424316	7.62	62	0.118624	0.59312
02-BUFFER	Valga	36056																			99.6957	97.0791	3.36403	1.93759	79.4368	0.996957	0.972737	0.197884	0.968793	0.794368	-21.3852	-1.0463	20502.4	59.9012	20405.5	89.46	99.9997	2.13211	0.211665	15.3888	0.931875	0.999997	293.288	0.792997	0.336712	4.78	59	0.334113	0
02-BUFFER	Vilaboa	36058																			99.4546	95.8466	2.35564	1.86982	75.5496	0.994546	0.960387	0.138567	0.934908	0.755496	-24.3219	-1.11878	59846.7	50.749	6699.15	89.35	97.3452	6.22366	0.179325	5.05215	0.930729	0.973452	167.186	0.387459	0.349656	6.93	59	0.348663	0
02-BUFFER	Vilanova de Arousa	36061																			99.6061	95.575	0	1.86565	98.6711	0.996061	0.957665	0	0.932826	0.986711	-22.5347	-1.07467	20825.1	19.6407	59972.7	86.15	49.6059	2.16567	0.0694018	0.200443	0.897396	0.496059	-23.4205	-0.225523	0.452893	11.51	59	0.202683	0.386063
02-BUFFER	A Illa de Arousa	36901																			99.8371	99.0923	21.2236	1.72416	100	0.998371	0.992909	1.24845	0.862078	1	2.03613	-0.468214	14633.2	23.0835	270188	92.38	96.3547	1.52175	0.0815672	0.903036	0.962292	0.963547	-11.3561	-0.186725	0.477177	18.69	66	0.402576	0
02-BUFFER	Arafo	38004																			99.9037	99.9987	62.746	1.91951	78.8117	0.999037	1.00199	3.69094	0.959753	0.788117	48.7967	0.685923	10260.9	38.6589	12510.2	89.58	50.3337	1.06707	0.136604	9.43458	0.933125	0.503337	141.494	0.304834	0.341162	8.34	61	0.0180799	0.361598
02-BUFFER	Arona	38006																			99.4184	100	13.7993	1.76754	93.6307	0.994184	1.002	0.811724	0.883768	0.936307	-7.44028	-0.702109	283.01	97.0392	67843.8	89.39	99.4906	0.0294311	0.342895	51.1643	0.931146	0.994906	969.253	2.96686	0.515486	36.6	84	0.335741	0.0506778
02-BUFFER	Breña Baja	38009																			99.6282	99.9987	21.0123	1.84854	90.6054	0.996282	1.00199	1.23602	0.924268	0.906054	1.29221	-0.486575	10245.3	11.2397	28449.4	85.89	100	1.06545	0.0397162	21.455	0.894687	1	389.098	1.10112	0.465623	4.66	69	0.0184026	0
02-BUFFER	Buenavista del Norte	38010																			99.9688	99.7419	82.7487	1.97527	93.5986	0.999688	0.999418	4.86757	0.987634	0.935986	75.8059	1.35256	3908.86	98.9929	6408.59	79.47	-11.995	0.406496	0.349798	4.83302	0.827812	-0.11995	25.9436	-0.0667709	0.237081	8.69	61	0.0416927	0.625391
02-BUFFER	Candelaria	38011																			99.672	99.9998	40.1271	1.89673	77.2642	0.99672	1.002	2.36042	0.948366	0.772642	21.6029	0.0147294	8835.83	53.786	28797.5	85.09	78.1422	0.918867	0.190056	21.7176	0.886354	0.781422	389.885	1.10365	0.508613	24.6	73	0.0810343	0.331504
02-BUFFER	Fuencaliente de la Palma	38014																			99.9607	96.0068	69.104	1.97661	79.6519	0.999607	0.961992	4.06494	0.988303	0.796519	56.2272	0.869321	4460.25	24.8109	26851.6	84.86	67.7211	0.463836	0.0876709	20.2501	0.883958	0.677211	347.256	0.966553	0.159478	0	49	0.0589971	0
02-BUFFER	Los Llanos de Aridane	38024																			99.6988	99.9749	23.5875	1.80398	97.4574	0.996988	1.00175	1.3875	0.901989	0.974574	5.25609	-0.388739	903.528	8.34	14719.3	78.87	93.4473	0.0939609	0.02947	11.1005	0.821563	0.934473	159.6	0.363062	0.512763	6.89	66	0.104441	0.547073
02-BUFFER	La Matanza de Acentejo	38025																			99.2936	99.9929	33.5891	1.81341	77.0225	0.992936	1.00193	1.97583	0.906706	0.770225	12.9526	-0.198776	10876.1	12.5411	69464.6	80.64	100	1.13104	0.044315	0.232168	0.84	1	-35.0496	-0.262922	0.50598	9.79	71	0.237181	0.451773
02-BUFFER	Puerto de la Cruz	38028																			99.0367	100	0.054266	1.2955	86.7619	0.990367	1.002	0.00319212	0.647749	0.867619	-29.7814	-1.25353	0	0	333579	80.44	81.615	0	0	1.1149	0.837917	0.81615	-44.6206	-0.293702	0.037754	29.34	61	0.466107	0.632574
02-BUFFER	San Miguel de Abona	38035																			99.5773	100	1.43998	1.77672	94.8182	0.995773	1.002	0.0847046	0.888361	0.948182	-21.6195	-1.05208	500.957	26.8755	55828	89.86	81.2868	0.0520962	0.0949664	42.1026	0.936042	0.812868	779.971	2.35814	0.479422	3.42	79	0.0158839	0.105893
02-BUFFER	Santa Úrsula	38039																			99.5185	99.9959	46.7395	1.81151	82.7663	0.995185	1.00196	2.74938	0.905753	0.827663	29.5989	0.212085	18422.5	13.9732	16299.2	84.27	100	1.91582	0.0493751	12.292	0.877812	1	222.701	0.56599	0.510203	2.05	76	0.148002	0.422863
02-BUFFER	Los Silos	38042																			99.8687	98.9393	51.1076	1.9618	99.3376	0.998687	0.991376	3.00633	0.980898	0.993376	39.4133	0.454324	12647.3	26.784	18427	84.72	-3.09415	1.31523	0.0946432	13.8967	0.8825	-0.0309415	223.163	0.567477	0.373059	12.17	53	0.412541	0
02-BUFFER	El Tanque	38044																			99.9892	93.281	62.5085	1.97157	98.0922	0.999892	0.93468	3.67697	0.985787	0.980922	51.5651	0.754251	8457.68	83.8719	9306.9	89.32	67.1661	0.879542	0.296367	7.01878	0.930417	0.671661	95.9353	0.158319	0.284115	7.43	61	0.0754717	0.754717
02-BUFFER	Tazacorte	38045																			99.6805	100	10.8118	1.91382	95.0735	0.996805	1.002	0.63599	0.956908	0.950735	-9.15117	-0.744337	1048.28	2.71027	44726.5	71.84	63.5883	0.109015	0.00957693	0.149487	0.748333	0.635883	-66.9541	-0.365525	0.477316	10.01	58	0.454545	0.21645
02-BUFFER	La Victoria de Acentejo	38051																			99.5833	99.9815	52.9133	1.88201	87.5696	0.995833	1.00182	3.11255	0.941006	0.875696	38.538	0.43272	19895.2	15.6608	14716	84.55	84.2013	2.06897	0.0553384	11.098	0.880729	0.842013	198.901	0.489453	0.496324	4.89	71	0.22299	0.557476
02-BUFFER	Villa de Mazo	38053																			99.7611	95.7601	22.7433	1.95344	83.2208	0.997611	0.95952	1.33784	0.976722	0.832208	2.078	-0.46718	9006.18	15.539	11156.6	82.85	100	0.936583	0.054908	8.4137	0.863021	1	125.364	0.252961	0.229694	1.15	52	0.418235	0
02-BUFFER	Cabezón de Liébana	39013																			99.9688	99.8161	47.1043	1.99488	99.9245	0.999688	1.00016	2.77084	0.997441	0.999245	35.3475	0.353972	20107.7	196.338	677.674	88.38	100	2.09106	0.693773	0.511066	0.920625	1	4.33053	-0.136277	0.0838318	30.3	17	0.168067	0
02-BUFFER	Herrerías	39033																			100	98.6173	2.19694	1.99506	98.8719	1	0.988149	0.129232	0.997532	0.988719	-17.9274	-0.960949	46882.7	53.3949	936.054	83.45	83.5324	4.87549	0.188675	0.705923	0.869271	0.835324	49.4937	0.00896507	0.113985	30.08	35	0.160514	0
02-BUFFER	Lamasón	39034																			100	98.0898	20.0769	2	97.0952	1	0.982864	1.18099	1	0.970952	2.69618	-0.451923	10200.4	143.461	1422.21	91.87	100	1.06078	0.506931	1.07255	0.956979	1	-8.05522	-0.176109	0.0585484	21.1	-2	0.331126	0
02-BUFFER	Peñarrubia	39049																			100	99.7244	69.0647	2	99.6593	1	0.999242	4.06263	1	0.996593	61.1694	0.991302	14336.8	60.4463	610.214	82.61	100	1.49094	0.213591	0.460191	0.860521	1	-19.4952	-0.2129	0.0732971	0.53	14	1.20482	0
02-BUFFER	Polaciones	39053																			100	99.3739	100	1.99933	99.8131	1	0.99573	5.88235	0.999665	0.998131	97.5176	1.88844	16471.9	544.764	896.381	86.61	100	1.71297	1.92496	0.676004	0.902188	1	24.3224	-0.0719845	0.0475828	0	13	0.41841	0
02-BUFFER	Potes	39055																			99.7855	99.5256	24.0458	1.9138	96.4091	0.997855	0.997251	1.41446	0.956898	0.964091	6.61103	-0.355297	23073.1	53.1827	747.827	83.02	67.8563	2.39945	0.187925	0.563972	0.864792	0.678563	-6.10601	-0.169841	0.374078	30.36	53	1.49031	2.23547
02-BUFFER	Rionansa	39063																			100	96.5485	14.2982	2	97.9779	1	0.96742	0.841069	1	0.979779	-4.23464	-0.622988	11503.5	83.2829	1337.85	85.18	95.9902	1.19629	0.294286	1.00894	0.887292	0.959902	-13.066	-0.192224	0.0868149	21.89	27	1.91388	0
02-BUFFER	Val de San Vicente	39095																			99.7912	99.7091	21.7007	1.93938	98.7904	0.997912	0.999089	1.27651	0.96969	0.987904	4.62217	-0.404386	68209.1	23.4381	76302.8	85.23	92.4896	7.09329	0.0828201	0.255023	0.887813	0.924896	84.8768	0.122756	0.211467	41.29	56	0.0356633	0
02-BUFFER	Vega de Liébana	39096																			100	99.7742	70.8719	2	99.8866	1	0.999741	4.16894	1	0.998866	63.3509	1.04515	15745.2	193.141	469.415	92.2	81.0196	1.6374	0.682477	0.354008	0.960417	0.810196	-11.1101	-0.185934	0.0715994	24.85	16	0.130719	0
02-BUFFER	Abades	40001																			99.7868	97.4845	0.00051478	1.96057	100	0.997868	0.976799	3.02812e-05	0.980287	1	-20.9003	-1.03433	301.14	4.65748	645.833	91.67	100	0.0313165	0.0164575	0.487054	0.954896	1	-50.2055	-0.311663	0.148617	17.28	43	0.115741	1.15741
02-BUFFER	Adrada de Pirón	40002																			100	99.9858	0	1.99522	88.9352	1	1.00186	0	0.997609	0.889352	-22.2235	-1.06699	2051.85	76.2636	439.439	100	100	0.213379	0.269483	0.331402	1.04167	1	-42.8814	-0.288109	0.0604266	53.95	13	2.43902	0
02-BUFFER	Arahuetes	40019																			100	100	99.9978	1.99304	96.7666	1	1.002	5.88223	0.996519	0.967666	96.9683	1.87488	5009.78	100.193	1732.45	100	100	0.520984	0.35404	1.30652	1.04167	1	-15.5357	-0.200166	0.0456993	61.97	-13	4.87805	0
02-BUFFER	Arcones	40020																			99.9676	99.9766	70.8233	1.96741	100	0.999676	1.00177	4.16608	0.983707	1	63.0246	1.03709	4695.54	269.09	1285.85	89.23	39.997	0.488305	0.950848	0.969721	0.929479	0.39997	-25.2335	-0.231354	0.0786848	60.99	-41	1.25786	0
02-BUFFER	Arevalillo de Cega	40021																			100	100	38.4843	1.99271	100	1	1.002	2.26378	0.996357	1	25.2429	0.104572	5291.95	72.1481	1677.54	100	100	0.550327	0.25494	1.26511	1.04167	1	-17.7591	-0.207317	0.0497206	47.62	-18	3.7037	0
02-BUFFER	Bernuy de Porreros	40031																			99.8384	99.9457	0	1.94887	100	0.998384	1.00146	0	0.974435	1	-20.5144	-1.0248	783.129	88.1232	422.659	91.52	100	0.0814402	0.31139	0.318748	0.953333	1	-46.7018	-0.300395	0.243986	41.77	53	0.131234	0
02-BUFFER	Brieva	40033																			100	99.9816	0	1.99598	100	1	1.00182	0	0.997991	1	-20.0038	-1.0122	791.013	70.2433	432.371	100	83.6929	0.0822601	0.248209	0.326072	1.04167	0.836929	-49.2973	-0.308742	0.068802	62.5	54	1.02041	0
02-BUFFER	Caballar	40034																			100	99.9957	44.3932	1.99411	100	1	1.00196	2.61137	0.997053	1	32.2076	0.276473	1914.84	83.9317	1723.26	96.15	89.9659	0.199131	0.296578	1.29959	1.00156	0.899659	-26.0696	-0.234043	0.0689889	59.68	-16	1.0989	0
02-BUFFER	Cabañas de Polendos	40035																			100	99.9676	0	1.99609	100	1	1.00168	0	0.998047	1	-20.0055	-1.01224	878.834	35.3795	597.211	90.2	76.3079	0.0913929	0.125016	0.450386	0.939583	0.763079	-52.6109	-0.319398	0.0752038	61.98	41	1.1236	0
02-BUFFER	Cubillo	40062																			100	99.9907	100	1.99732	100	1	1.00191	5.88235	0.998658	1	97.6584	1.89192	2200.09	108.445	1737.6	72.22	100	0.228795	0.383199	1.31041	0.752292	1	-26.5061	-0.235446	0.0514117	59.26	-11	1.38889	0
02-BUFFER	Encinillas	40072																			100	78.3563	0	1.99198	100	1	0.785133	0	0.995988	1	-24.3776	-1.12015	245.323	6.09466	654.075	93.1	100	0.0255119	0.0215359	0.493269	0.969792	1	-49.7978	-0.310352	0.146476	33.85	21	0.352113	0
02-BUFFER	Espirdo	40077																			99.9908	96.9601	0	1.9911	100	0.999908	0.971544	0	0.995551	1	-20.6599	-1.02839	485.68	62.4285	419.372	94.44	92.655	0.0505075	0.220595	0.316269	0.98375	0.92655	-50.0466	-0.311151	0.177962	47.42	68	0.240385	0
02-BUFFER	Garcillán	40094																			99.9238	99.9734	0	1.97882	100	0.999238	1.00174	0	0.989412	1	-20.1923	-1.01685	161.253	1.18482	655.794	95.74	100	0.0167692	0.00418665	0.494565	0.997292	1	-49.7437	-0.310178	0.131569	22.22	28	0.222222	0
02-BUFFER	Hontanares de Eresma	40101																			99.7123	99.0075	0	1.8975	100	0.997123	0.992059	0	0.94875	1	-21.2414	-1.04274	2050.85	31.4893	634.824	95.29	92.4437	0.213275	0.11127	0.478751	0.992604	0.924437	-45.5933	-0.29683	0.364506	32.09	60	0.0733676	0
02-BUFFER	Los Huertos	40103																			100	99.9158	0	1.99578	100	1	1.00116	0	0.99789	1	-20.019	-1.01257	2459.12	33.7539	659.323	93.44	100	0.255732	0.119272	0.497227	0.973333	1	-43.0887	-0.288775	0.0892109	28.04	24	0.571429	0
02-BUFFER	Ituero y Lama	40104																			99.7339	99.9142	82.0599	1.88245	100	0.997339	1.00114	4.82706	0.941224	1	75.3353	1.34094	1492.43	93.4629	321.918	92.31	95.5544	0.155203	0.330258	0.242774	0.961562	0.955544	-47.0932	-0.301653	0.148945	87.9	47	0.286533	0
02-BUFFER	Juarros de Riomoros	40105																			99.6461	98.5944	2.00915	1.93998	100	0.996461	0.98792	0.118186	0.969991	1	-18.5489	-0.976289	2813.52	34.0166	635.31	89.29	100	0.292587	0.1202	0.479118	0.930104	1	-43.5598	-0.29029	0.0611438	58.97	31	1.81818	0
02-BUFFER	Lastras del Pozo	40111																			99.9467	99.9947	25.5778	1.98781	92.2716	0.999467	1.00195	1.50458	0.993906	0.922716	8.45235	-0.30985	1573.93	17.1626	655.682	90	100	0.163678	0.0606451	0.494481	0.9375	1	-46.8739	-0.300948	0.0464287	47.5	8	1.38889	0
02-BUFFER	La Lastrilla	40112																			99.2293	99.6915	0	1.7217	100	0.992293	0.998912	0	0.86085	1	-22.9589	-1.08514	394.62	19.9671	379.664	92.9	78.3745	0.0410378	0.070555	0.286323	0.967708	0.783745	-57.0126	-0.333554	0.46864	18.37	86	0.0536193	0.536193
02-BUFFER	Martín Miguel	40119																			99.8419	99.8649	0	1.95606	100	0.998419	1.00065	0	0.978031	1	-20.458	-1.02341	86.1468	0.510111	652.068	94.87	100	0.00895869	0.00180251	0.491756	0.988229	1	-50.1851	-0.311597	0.115585	32.54	23	0.471698	0
02-BUFFER	Marugán	40122																			99.7101	99.9983	45.4554	1.75911	100	0.997101	1.00199	2.67385	0.879557	1	31.0499	0.247898	1512.64	30.4496	515.473	93.79	100	0.157304	0.107596	0.388743	0.976979	1	-47.3876	-0.3026	0.136596	84.47	44	0.160514	0
02-BUFFER	Matabuena	40123																			99.9988	99.9994	83.2489	1.98787	100	0.999988	1.002	4.89699	0.993933	1	77.8582	1.40321	5415.89	581.268	1051.68	95.18	100	0.563217	2.05395	0.793123	0.991458	1	8.03494	-0.124364	0.0924154	62.28	13	0.60241	0
02-BUFFER	La Matilla	40125																			100	99.8913	0	1.97892	79.9087	1	1.00091	0	0.989458	0.799087	-24.2108	-1.11604	1179.53	37.8695	1669.1	94.59	100	0.122663	0.133815	1.25875	0.985313	1	-29.9892	-0.246648	0.105267	62.73	-4	1.02041	0
02-BUFFER	Monterrubio	40131																			99.9988	100	84.0722	1.98857	92.9868	0.999988	1.002	4.94542	0.994287	0.929868	77.4314	1.39268	2278.84	30.0446	658.892	89.29	100	0.236984	0.106165	0.496902	0.930104	1	-44.5969	-0.293626	0.0456827	65.04	41	1.6129	0
02-BUFFER	Navas de San Antonio	40146																			99.9794	99.8859	87.6027	1.97773	100	0.999794	1.00086	5.1531	0.988866	1	82.8524	1.52648	664.442	484.32	89.6081	93.4	99.4329	0.0690975	1.71138	0.0675778	0.972917	0.994329	-23.6941	-0.226403	0.0710275	47.75	12	0.285714	0
02-BUFFER	Orejana	40150																			100	99.9958	0	1.98928	95.5123	1	1.00196	0	0.994641	0.955123	-20.9655	-1.03594	3498.98	76.1293	1724.44	94.12	75	0.36387	0.269008	1.30048	0.980417	0.75	-26.7244	-0.236149	0.0534744	57.96	-10	1.53846	0
02-BUFFER	Pedraza	40156																			100	99.9797	50.8701	1.99397	100	1	1.0018	2.99236	0.996987	1	39.8229	0.464433	3198.93	113.675	1725.01	97.01	100	0.332668	0.40168	1.30091	1.01052	1	-19.0844	-0.211579	0.108559	47.21	34	0.773196	0
02-BUFFER	Pelayos del Arroyo	40157																			100	100	45.6585	1.9893	100	1	1.002	2.68579	0.994649	1	33.6489	0.312047	1408.56	54.6407	871.517	100	100	0.146481	0.193077	0.657253	1.04167	1	-39.2305	-0.276367	0.0703919	73.33	-71	2.17391	0
02-BUFFER	Rebollo	40165																			100	99.7426	9.32098	1.99263	100	1	0.999425	0.548293	0.996317	1	-9.11932	-0.743551	2515.07	32.481	627.094	91.43	100	0.26155	0.114774	0.472922	0.952396	1	-43.9672	-0.2916	0.0765175	59.02	-34	1.14943	0
02-BUFFER	Roda de Eresma	40173																			99.8135	100	0	1.89783	100	0.998135	1.002	0	0.948914	1	-21.0189	-1.03726	79.5355	7.77077	656.699	90.91	100	0.00827117	0.0274586	0.495248	0.946979	1	-50.4409	-0.31242	0.130487	22.41	41	0.540541	0
02-BUFFER	Torreiglesias	40205																			99.974	99.9846	0.0181651	1.98892	96.582	0.99974	1.00185	0.00106854	0.994458	0.96582	-20.7413	-1.0304	1156.13	48.0642	423.299	91.8	100	0.12023	0.169838	0.31923	0.95625	1	-48.689	-0.306786	0.070886	39.42	-11	1.06383	0
02-BUFFER	Turégano	40208																			99.9648	99.9759	25.3055	1.98666	100	0.999648	1.00176	1.48856	0.993328	1	9.666	-0.279895	2013.36	27.7005	657.748	94.25	97.7899	0.209376	0.0978817	0.49604	0.981771	0.977899	-44.7407	-0.294088	0.112119	41.32	34	0.39801	0.995025
02-BUFFER	Valdeprados	40211																			100	99.991	97.5347	2	89.3687	1	1.00191	5.73734	1	0.893687	92.6587	1.76852	1573.81	210.658	535.105	94.12	100	0.163665	0.744373	0.403548	0.980417	1	-34.1599	-0.260061	0.0601305	35.62	8	1.35135	0
02-BUFFER	Valdevacas y Guijar	40213																			100	100	46.2229	1.99186	100	1	1.002	2.71899	0.99593	1	34.3385	0.329068	1975.74	65.7998	1693.59	94.92	100	0.205464	0.232508	1.27722	0.98875	1	-25.9212	-0.233565	0.0718568	45.36	14	1.05263	0
02-BUFFER	Valseca	40214																			100	99.87	0	1.99151	100	1	1.0007	0	0.995755	1	-20.0709	-1.01386	396.474	21.6311	546.469	91.43	19.6422	0.0412307	0.0764349	0.412119	0.952396	0.196422	-66.428	-0.363833	0.101653	19.05	22	0.408163	0
02-BUFFER	Valverde del Majano	40216																			99.8529	99.5534	0.0015171	1.94163	100	0.998529	0.997529	8.9241e-05	0.970815	1	-20.6608	-1.02841	783.24	6.89671	641.829	96.57	100	0.0814517	0.02437	0.484034	1.00594	1	-48.0841	-0.30484	0.168172	27.07	58	0.093985	1.8797
02-BUFFER	Valleruela de Pedraza	40220																			100	100	0.0184219	1.9836	79.9985	1	1.002	0.00108364	0.991801	0.799985	-24.1025	-1.11336	1820.88	34.5479	1717.69	100	100	0.18936	0.122077	1.29539	1.04167	1	-27.0301	-0.237132	0.0813334	71.57	-4	0	0
02-BUFFER	Vegas de Matute	40223																			99.349	99.9992	100	1.89634	94.4791	0.99349	1.002	5.88235	0.948171	0.944791	95.416	1.83657	4041.32	252.529	235.518	82.19	100	0.420271	0.892328	0.177615	0.856146	1	-33.0728	-0.256565	0.102762	54.41	-17	0.377358	3.77358
02-BUFFER	Villacastín	40225																			99.8671	99.7374	56.6416	1.95777	98.0659	0.998671	0.999373	3.33186	0.978885	0.980659	45.7889	0.611685	1188.09	960.524	259.727	91.77	94.127	0.123554	3.39408	0.195872	0.955937	0.94127	12.2142	-0.110924	0.110295	21.77	55	1.33779	1.33779
02-BUFFER	Zarzuela del Monte	40233																			99.9083	99.9783	96.7385	1.96453	88.5086	0.999083	1.00179	5.6905	0.982263	0.885086	91.1744	1.73188	1053.47	41.1313	398.005	90.53	100	0.109554	0.14534	0.300155	0.943021	1	-50.0386	-0.311126	0.129248	30.89	36	0.197628	0
02-BUFFER	Marazoleja	40903																			99.9337	99.9671	0	1.97378	100	0.999337	1.00167	0	0.98689	1	-20.242	-1.01808	2240.28	19.9848	650.179	100	100	0.232974	0.0706177	0.490331	1.04167	1	-43.2882	-0.289417	0.0611024	30.54	-60	0.952381	0
02-BUFFER	San Cristóbal de Segovia	40906																			99.1856	99.8965	0	1.8021	100	0.991856	1.00097	0	0.901049	1	-22.1226	-1.06449	498.472	0.864353	399.293	90.78	70.7929	0.0518377	0.00305425	0.301126	0.945625	0.707929	-59.8086	-0.342546	0.489191	28.03	89	0	0.660502
02-BUFFER	Almensilla	41010																			99.3627	100	0.00098681	1.73458	100	0.993627	1.002	5.80477e-05	0.86729	1	-22.7404	-1.07974	1015.55	0.0552061	330.679	81.31	59.9097	0.105611	0.000195075	0.249381	0.846979	0.599097	-63.9747	-0.355944	0.479611	21.94	79	0.0168663	1.01198
02-BUFFER	Benacazón	41015																			99.9038	99.5833	8.58353	1.935	81.8463	0.999038	0.997828	0.504914	0.967498	0.818463	-14.2452	-0.870066	1017.13	82.5549	300.406	79.09	87.8605	0.105775	0.291714	0.226551	0.823854	0.878605	-53.47	-0.322161	0.394169	1.67	73	0.0139528	0.83717
02-BUFFER	Bollullos de la Mitación	41016																			99.824	99.9633	0.321881	1.90538	100	0.99824	1.00164	0.0189342	0.952688	1	-20.57	-1.02618	1272.27	24.9103	356.837	74.8	86.4194	0.132308	0.0880223	0.269108	0.779167	0.864194	-57.344	-0.33462	0.347984	0.1	69	0.00951294	1.33181
02-BUFFER	Las Cabezas de San Juan	41020																			99.9279	100	1.91279	1.96127	85.2471	0.999279	1.002	0.112517	0.980634	0.852471	-21.0619	-1.03831	69.0318	7.0708	141.373	77.62	80.9443	0.00717885	0.0249852	0.106616	0.808542	0.809443	-64.8647	-0.358806	0.250275	1	74	0.127908	0.730905
02-BUFFER	Carrión de los Céspedes	41025																			99.1968	65.3091	0	1.73534	100	0.991968	0.6544	0	0.867668	1	-29.7193	-1.252	173.326	1.82718	25.5201	57.45	72.7212	0.0180247	0.00645647	0.019246	0.598438	0.727212	-72.6125	-0.383722	0.482093	4.85	51	0.0396197	1.58479
02-BUFFER	Castilleja del Campo	41030																			99.8632	99.0344	0	1.96177	100	0.998632	0.992329	0	0.980883	1	-20.5631	-1.026	137.603	4.13979	28.7492	71.73	67.4255	0.0143098	0.0146282	0.0216812	0.747188	0.674255	-70.5588	-0.377118	0.178347	8.5	48	0.159236	4.77707
02-BUFFER	Coria del Río	41034																			99.8948	100	3.12777	1.89269	100	0.998948	1.002	0.183987	0.946344	1	-17.3743	-0.9473	275.079	3.83844	204.017	74.71	77.0244	0.0286064	0.0135634	0.153859	0.778229	0.770244	-65.11	-0.359595	0.513838	4.26	71	0.130997	0.720485
02-BUFFER	Dos Hermanas	41038																			99.3425	100	2.71547	1.70156	100	0.993425	1.002	0.159733	0.850778	1	-19.8812	-1.00917	204.46	1.06302	52.1547	76.78	98.5441	0.0212625	0.00375624	0.0393324	0.799792	0.985441	-63.0083	-0.352836	0.578225	3.85	80	0.257259	0.882679
02-BUFFER	Gelves	41044																			99.1657	99.8883	6.89017	1.59534	100	0.991657	1.00088	0.405304	0.797669	1	-16.0897	-0.915593	330.845	0.264059	109.427	82.87	76.2071	0.0344057	0.00093307	0.0825239	0.863229	0.762071	-65.1367	-0.359681	0.403186	4.73	82	0.00994926	0.895433
02-BUFFER	Huévar del Aljarafe	41051																			99.8731	97.033	1.18248	1.92973	99.4158	0.998731	0.972274	0.0695579	0.964863	0.994158	-20.0083	-1.01231	470.453	10.4592	117.482	65.07	16.0803	0.048924	0.0369583	0.0885985	0.677812	0.160803	-79.7381	-0.406638	0.195076	4.95	64	0.0346861	1.04058
02-BUFFER	Lebrija	41053																			99.8714	99.9974	3.75217	1.96383	85.2529	0.998714	1.00198	0.220716	0.981917	0.852529	-18.8829	-0.984534	72.1876	19.3738	340.834	79.62	21.7646	0.00750703	0.0684586	0.257039	0.829375	0.217646	-72.3995	-0.383037	0.258435	2	73	0.437796	0.802627
02-BUFFER	Mairena del Aljarafe	41059																			99.3642	96.6204	1.08632	1.49908	100	0.993642	0.968141	0.0639011	0.74954	1	-24.4955	-1.12306	612.767	7.01874	239.072	82.04	77.4408	0.0637236	0.0248012	0.180295	0.854583	0.774408	-62.0438	-0.349734	0.127727	9.73	86	0.0879682	1.01163
02-BUFFER	Los Palacios y Villafranca	41069																			99.7656	100	0	1.89203	100	0.997656	1.002	0	0.946013	1	-21.0865	-1.03892	25.0952	3.16026	162.444	77.76	-14.8287	0.00260974	0.011167	0.122507	0.81	-0.148287	-84.0401	-0.420473	0.484143	2.08	77	0.11243	0.60137
02-BUFFER	Palomares del Río	41070																			99.6123	no data	0.594337	1.63834	100	0.996123	no data	0.034961	0.819171	1	-28.7436	-1.22791	232.581	0	246.157	84.02	54.4496	0.0241868	0	0.185639	0.875208	0.544496	-67.4094	-0.366989	0.505061	29.63	77	0.0118793	1.42552
02-BUFFER	Pilas	41075																			99.8847	96.8238	13.5623	1.90653	100	0.998847	0.970179	0.797782	0.953265	1	-5.59855	-0.656652	1271.83	4.46478	298.943	68	29.229	0.132262	0.0157766	0.225447	0.708333	0.29229	-72.5178	-0.383418	0.447072	3.02	69	0.14298	1.07235
02-BUFFER	Sanlúcar la Mayor	41087																			99.5298	95.856	7.2446	1.89668	88.1205	0.995298	0.960481	0.426153	0.948341	0.881205	-15.7705	-0.907713	902.07	91.2104	290.561	77.58	86.5589	0.0938093	0.322298	0.219126	0.808125	0.865589	-53.821	-0.32329	0.284303	13.25	72	0.147243	0.957079
02-BUFFER	Sevilla	41091																			99.5028	100	1.05451	1.37747	100	0.995028	1.002	0.06203	0.688736	1	-25.044	-1.1366	66.8952	12.1134	127.414	77.87	49.6689	0.00695665	0.0428036	0.0960889	0.811146	0.496689	-70.9263	-0.3783	0.500271	7.22	66	0.395107	0.832567
02-BUFFER	Umbrete	41094																			99.8069	100	0.184537	1.82559	100	0.998069	1.002	0.0108551	0.912793	1	-21.5256	-1.04976	1260.24	2.3963	348.535	86.53	-1.96229	0.131056	0.0084675	0.262847	0.901354	-0.0196229	-74.318	-0.389207	0.501935	8.05	73	0.0115009	1.3801
02-BUFFER	Utrera	41095																			99.9388	99.8229	2.06191	1.97255	69.8126	0.999388	1.00023	0.121289	0.986274	0.698126	-23.8939	-1.10821	162.07	36.089	73.968	69.05	77.626	0.0168542	0.127523	0.0557828	0.719271	0.77626	-66.0862	-0.362734	0.280986	7.33	72	0.27324	0.683099
02-BUFFER	Villamanrique de la Condesa	41097																			99.9727	99.8946	43.8742	1.97895	100	0.999727	1.00095	2.58084	0.989477	1	31.4198	0.257028	1649.9	55.3601	54.5907	61.4	74.5194	0.171579	0.195619	0.0411695	0.639583	0.745194	-64.1371	-0.356466	0.243427	0.69	68	0.0224517	1.12259
02-BUFFER	Isla Mayor	41902																			99.959	99.2993	5.45718	1.98092	100	0.99959	0.994983	0.321011	0.990459	1	-13.8792	-0.861032	0.121572	0.0218341	240.536	63.03	74.7304	1.26427e-05	7.71522e-05	0.1814	0.656563	0.747304	-68.2929	-0.369831	0.206625	0.76	76	0.0339616	1.01885
02-BUFFER	Alcaudete de la Jara	45006																			99.9721	99.6754	8.63166	1.99182	66.6625	0.999721	0.998752	0.507745	0.995909	0.666625	-16.625	-0.928804	1580.6	56.4858	303.166	88.99	57.4303	0.164372	0.199597	0.228632	0.926979	0.574303	-58.1223	-0.337123	0.103631	33.71	21	0.0572082	0.572082
02-BUFFER	Camuñas	45034																			99.9653	99.9036	7.22609	1.9596	100	0.999653	1.00104	0.425064	0.979799	1	-11.8889	-0.811909	639.937	8.55508	266.632	88.37	100	0.0665492	0.03023	0.20108	0.920521	1	-55.6324	-0.329115	0.12332	30.7	28	0.0562114	1.12423
02-BUFFER	Consuegra	45053																			99.9701	99.633	23.3871	1.98327	99.047	0.999701	0.998326	1.37571	0.991635	0.99047	7.11693	-0.342811	1125.13	60.3593	178.922	94.85	72.5891	0.117006	0.213284	0.134934	0.988021	0.725891	-56.4173	-0.331639	0.163316	7.93	51	0.197122	0.591366
02-BUFFER	Espinoso del Rey	45063																			99.9664	99.8546	15.5261	1.98924	56.8783	0.999664	1.00055	0.913303	0.994621	0.568783	-10.4617	-0.776682	8316.11	59.2547	519.51	94.55	87.0243	0.864821	0.209381	0.391787	0.984896	0.870243	-33.5775	-0.258188	0.0971025	54.58	-18	0.214592	0
02-BUFFER	Madridejos	45087																			99.9667	99.8833	25.4701	1.96177	100	0.999667	1.00083	1.49824	0.980887	1	9.59261	-0.281706	1098.36	61.9213	216.934	94.78	65.9738	0.114222	0.218803	0.1636	0.987292	0.659738	-57.1269	-0.333921	0.192448	19.08	55	0.188023	1.03413
02-BUFFER	Marjaliza	45092																			99.9838	99.9699	21.411	1.99454	90.441	0.999838	1.0017	1.25947	0.99727	0.90441	3.25385	-0.438158	1286.74	14.3839	41.2207	82.14	64.4714	0.133812	0.0508265	0.0310865	0.855625	0.644714	-65.6787	-0.361424	0.0615433	37.83	6	0.37037	3.7037
02-BUFFER	Mazarambroz	45096																			99.9807	99.9748	63.7987	1.99461	98.9854	0.999807	1.00175	3.75287	0.997306	0.989854	54.8317	0.834876	1867.54	74.2873	290.285	85.11	97.0214	0.194212	0.262499	0.218918	0.886563	0.970214	-49.3519	-0.308917	0.0707345	40.13	49	0.0794281	0.794281
02-BUFFER	Menasalbas	45098																			99.9779	99.9824	27.2072	1.98823	94.9371	0.999779	1.00183	1.60043	0.994113	0.949371	10.9103	-0.249183	2698.54	146.259	320.743	93.28	100	0.28063	0.516815	0.241888	0.971667	1	-39.78	-0.278135	0.120113	25.28	37	0.0365097	0.730194
02-BUFFER	Navahermosa	45109																			99.9646	99.9665	13.9349	1.9808	92.1785	0.999646	1.00167	0.819702	0.9904	0.921785	-5.33596	-0.65017	2515.61	35.9008	764.571	90.72	36.0079	0.261607	0.126858	0.576599	0.945	0.360079	-54.5971	-0.325786	0.162416	33.21	38	0.535045	1.07009
02-BUFFER	Los Navalmorales	45112																			99.9624	99.9587	6.11432	1.98395	83.9623	0.999624	1.00159	0.359666	0.991975	0.839623	-16.1504	-0.917091	2642.37	25.7117	578.791	88.83	100	0.274789	0.0908539	0.436494	0.925312	1	-45.451	-0.296372	0.144974	42.86	28	0.764234	1.14635
02-BUFFER	Retamoso de la Jara	45146																			100	99.5047	1.71449	1.9966	94.5	1	0.997041	0.100852	0.998301	0.945	-19.1761	-0.991771	1609.58	18.7699	719.04	93.1	100	0.167385	0.0663248	0.542262	0.969792	1	-45.0847	-0.295194	0.0443073	28.95	-154	0.952381	0
02-BUFFER	Robledo del Mazo	45148																			100	99.9994	80.0648	1.99809	76.8146	1	1.002	4.70969	0.999045	0.768146	69.5777	1.19883	9939.65	52.2265	173.273	83.81	53.0351	1.03366	0.184546	0.130673	0.873021	0.530351	-44.955	-0.294777	0.0464792	55.34	-82	1.67224	0
02-BUFFER	San Bartolomé de las Abiertas	45150																			99.9869	99.4603	0.0137908	1.99008	78.1311	0.999869	0.996596	0.000811221	0.995038	0.781311	-24.5275	-1.12385	1045.73	11.1492	137.828	87.33	21.5846	0.108749	0.0393965	0.103943	0.909687	0.215846	-72.4476	-0.383192	0.0891565	56.31	0	0.215517	0
02-BUFFER	San Martín de Pusa	45152																			99.9868	97.8636	1.01818	1.99231	85.5986	0.999868	0.980597	0.059893	0.996156	0.855986	-22.15	-1.06517	985.149	11.8878	167.893	93.01	64.0519	0.102449	0.0420064	0.126616	0.968854	0.640519	-62.3911	-0.350851	0.0803484	26.38	15	0.145985	1.45985
02-BUFFER	San Pablo de los Montes	45153																			99.9841	99.4261	64.3552	1.98929	88.9847	0.999841	0.996253	3.7856	0.994647	0.889847	53.3238	0.797658	5812.51	42.4182	187.814	93.16	49.8311	0.604463	0.149888	0.141639	0.970417	0.498311	-52.7056	-0.319703	0.135449	36.68	50	0.0535619	1.07124
02-BUFFER	Santa Ana de Pusa	45155																			99.9523	99.6658	2.83177	1.97547	91.3156	0.999523	0.998655	0.166575	0.987735	0.913156	-18.6871	-0.979701	1501.32	30.7012	607.922	85.32	99.9994	0.156127	0.108485	0.458463	0.88875	0.999994	-47.7636	-0.30381	0.147527	66.85	-34	0.251889	0
02-BUFFER	Sonseca	45163																			99.8478	97.4982	0.0397432	1.92005	100	0.998478	0.976936	0.00233784	0.960024	1	-21.2445	-1.04282	401.253	17.5701	384.316	91.03	75.5049	0.0417277	0.0620852	0.289831	0.948229	0.755049	-58.0615	-0.336927	0.37961	5.49	65	0.180701	0.722804
02-BUFFER	Torrecilla de la Jara	45170																			100	99.7396	5.66153	1.99659	82.708	1	0.999394	0.333031	0.998297	0.82708	-16.844	-0.934209	3149.52	28.1492	804.22	86.08	72.4811	0.327529	0.0994672	0.606501	0.896667	0.724811	-46.9005	-0.301034	0.0565668	55.81	-16	0.840336	0
02-BUFFER	Urda	45177																			99.9834	99.7913	45.0373	1.9926	96.0834	0.999834	0.999913	2.64925	0.996299	0.960834	32.1226	0.274375	2448.6	49.5004	122.082	93.08	76.2865	0.254638	0.174913	0.092068	0.969583	0.762865	-54.9187	-0.32682	0.107586	16.04	39	0.0379363	0.758725
02-BUFFER	Las Ventas con Peña Aguilera	45182																			99.9808	99.9288	59.611	1.99078	93.6863	0.999808	1.00129	3.50653	0.995388	0.936863	48.7976	0.685943	2590.63	77.335	156.597	94.01	62.6292	0.269408	0.273268	0.118097	0.979271	0.626292	-54.6733	-0.326031	0.0880048	30.69	35	0.0874126	0.874126
02-BUFFER	Los Yébenes	45200																			99.9868	99.9882	66.8573	1.99438	96.4386	0.999868	1.00189	3.93278	0.997189	0.964386	57.9222	0.911156	3717.05	51.2993	86.1484	90.66	87.7031	0.386549	0.18127	0.0649686	0.944375	0.877031	-50.9161	-0.313948	0.0910731	9.25	53	0.332834	0.665668
02-BUFFER	El Redegüelo	53058																			100	100	100	2	100	1	1.002	5.88235	1	1	97.6871	1.89263	1578.92	192.797	140	no data	no data	0.164197	0.681261	0.105581	no data	no data	-68.2987	-0.369849	no data	no data	no data	no data	no data
																								SIZ_Average	51.6755	Buff_Aver	7.53377		Tot_Average		21.0061					SIZ_Average	161.742	Buff_Aver	-3.82674		Tot_Average		46.706					SIZ_Average	17.6037
																								SIZ_Desvest	31.8487	Buff_Desvest	36.3639		Tot_Desvest		40.5156					SIZ_Desvest	524.589	Buff_Desvest	99.5539		Tot_Desvest		310.95					SIZ_Desvest	88.2204
																														Z_ENSI	SIZ_Average	0.756977	0.855969	SIZ_Median								Z_ECSI	SIZ_Average	0.369951	-0.151194	SIZ_Median
																														Z_ENSI	Buff_Aver	-0.332522	-0.738369	Buff_Median								Z_ECSI	Buff_Aver	-0.162511	-0.259127	Buff_Median
																																												Z_ENSI	Z_ECSI	Z_SOSI
																																											Z_ENSI	1
																																											Z_ECSI	0.103751	1
																																											Z_SOSI	0.103863	-0.0471339	1
[truncated: 7 more columns]

## Sheet: 01-Picos-Europa_NP
																					SASMU (ENSI)												SASMU (ECSI)												SASMU (SOSI)
																					Original data					Normalized data							Original data					Normalized data							Original data
																					EN02 CHANGE IN ARTIFICIAL AREA	EN09 INDEX OF BURNT FOREST AREA	EN10 PROTECTED AREA	EN14 HABITAT'S FRAGMENTATION INDEX	EN23 SOIL EROSION	EN02 CHANGE IN ARTIFICIAL AREA	EN09 INDEX OF BURNT FOREST AREA	EN10 PROTECTED AREA	EN14 HABITAT'S FRAGMENTATION INDEX	EN23 SOIL EROSION	ENSI	Z_ENSI	EC01 ATMOSPHERIC CARBON FIXATION SERVICES	EC02 PRODUCTIVE SERVICES FOR LIVESTOCK	EC06 VALUE OF RECREATIONAL SERVICES	EC06 UNEMPLOYMENT RATE	EC07 PUBLIC MUNICIPAL DEBT	EC01 ATMOSPHERIC CARBON FIXATION SERVICES	EC02 PRODUCTIVE SERVICES FOR LIVESTOCK	EC06 VALUE OF RECREATIONAL SERVICES	EC06 UNEMPLOYMENT RATE	EC07 PUBLIC MUNICIPAL DEBT	ECSI	Z_ECSI	SO01 POPULATION DENSITY	SO03 SECOND HOMES	SO04 SENILE DEPENDENCY INDEX	SO05 MEDICAL FACILITIES INDEX	SO06 INDEX OF EDUCATIONAL FACILITIES
											Target Value (TV)										100	99.8	17	2	100	1	1	1	1	1			9616	283	1.326 / 299.200	96	100	1	1	1	1	1			0.38	26.7	71	0.24	0.547
LOCATION	MUNICIPALITY NAME	MUNI_CODE	NATIONAL PARK NAME	NOMBRE_INE	INSPIREID	NATLEVEL	NATCODE	CODNUT1	CODNUT2	CODNUT3	Sup_Muni_Ha	clc90_cod1_Ha	clc90_cod2_Ha	clc90_cod3_Ha	clc90_cod5_Ha	clc06_cod1_Ha	clc06_cod2_Ha	clc06_cod3_Ha	clc06_cod5_Ha		CAL	IBFA	PA	HFI_2018	SERO	CAL	IBFA	PA	HFI_2018	SERO			ACFS	PSL	VRS	UR	PMD	ACFS	PSL	VRS	UR	PMD	ECSI	Z_ECSI	PD	SH	SDI	MFI	IEF
01-SIZ	Abla	04001	Sierra Nevada NP	Abla	ES.IGN.SIGLIM.34010404001	4	34010404001	ES6	ES61	ES611	4520.87										99.9348	99.9445	36.0527	1.98166	89.7664	0.999348	1.00145	2.12075	0.990832	0.897664	20.2007	-0.019878	3911.12	138.269	58.9268	71.91	71.6373	0.40673	0.488584	0.0444395	0.749062	0.716373	-51.8962	-0.3171	0.161729	21.75	36	1.57853	2.3678
01-SIZ	Abrucena	04002	Sierra Nevada NP	Abrucena	ES.IGN.SIGLIM.34010404002	4	34010404002	ES6	ES61	ES611	8361.08										99.9721	99.9975	80.8309	1.9899	63.1694	0.999721	1.00198	4.75476	0.994952	0.631694	67.6621	1.15155	6538.57	104.577	129.156	74.25	97.8544	0.679968	0.36953	0.0974026	0.773438	0.978544	-42.0224	-0.285346	0.114852	21.44	38	0.0854701	0.854701
01-SIZ	Alboloduy	04005	Sierra Nevada NP	Alboloduy	ES.IGN.SIGLIM.34010404005	4	34010404005	ES6	ES61	ES611	6968.07										100	99.9387	52.861	1.99574	91.4448	1	1.00139	3.10947	0.99787	0.914448	40.4636	0.480246	2109.89	143.593	77.5916	71.65	100	0.219415	0.507396	0.0585156	0.746354	1	-49.3664	-0.308964	0.0891848	4.97	36	0.163934	3.27869
02-BUFFER	Alcolea	04007																			100	99.9815	3.0169	1.9963	73.5198	1	1.00182	0.177465	0.998149	0.735198	-21.7474	-1.05523	3073.93	86.9887	4705.16	63.64	65.6956	0.319668	0.307381	3.54839	0.662917	0.656956	9.90618	-0.118346	0.104719	9.22	38	0.246609	3.69914
02-BUFFER	Alcóntar	04008																			100	99.9527	0.18189	1.99076	97.1766	1	1.00153	0.0106994	0.99538	0.971766	-20.4125	-1.02229	6901.55	73.8923	13.1638	77.53	68.8574	0.717715	0.261104	0.00992744	0.807604	0.688574	-50.3015	-0.311971	0.0733393	26.11	31	0.34662	0
02-BUFFER	Alhabia	04010																			99.8544	99.99	78.2119	1.9604	99.9044	0.998544	1.0019	4.6007	0.9802	0.999044	71.6078	1.24894	621.916	79.5999	39.2615	78.11	-302.948	0.0646751	0.281272	0.0296089	0.813646	-3.02948	-136.806	-0.590164	0.183044	11.71	54	0.147493	1.47493
02-BUFFER	Alhama de Almería	04011																			99.7754	84.2783	32.4539	1.95102	77.0591	0.997754	0.844472	1.90905	0.975512	0.770591	9.94762	-0.272944	2215.78	106.404	24.3323	87.88	37.7568	0.230426	0.375987	0.0183502	0.915417	0.377568	-61.645	-0.348452	0.333514	11.16	61	0.547495	1.36874
02-BUFFER	Alicún	04012																			100	100	47.8959	1.96599	67.0994	1	1.002	2.8174	0.982994	0.670994	29.4679	0.208852	1204.81	118.465	22.8194	91.78	-6.60416	0.125292	0.418605	0.0172092	0.956042	-0.0660416	-70.9779	-0.378466	0.190924	10.24	42	0.460829	4.60829
02-BUFFER	Almócita	04014																			100	99.9971	78.8486	1.99832	92.8354	1	1.00198	4.63815	0.999162	0.928354	71.3529	1.24265	1461.12	266.26	27.3775	83.61	85.4287	0.151947	0.940848	0.0206467	0.870938	0.854287	-43.2267	-0.289219	0.0702745	24.58	-7	0.574713	0
01-SIZ	Alsodux	04015	Sierra Nevada NP	Alsodux	ES.IGN.SIGLIM.34010404015	4	34010404015	ES6	ES61	ES611	2008.69										100	100	74.1715	1.99774	85.8075	1	1.002	4.36303	0.99887	0.858075	64.4396	1.07202	1037.48	98.3891	58.3915	88.57	99.6591	0.107891	0.347665	0.0440359	0.922604	0.996591	-51.6243	-0.316225	0.077726	28.26	4	0.757576	0
01-SIZ	Bayárcal	04020	Sierra Nevada NP	Bayárcal	ES.IGN.SIGLIM.34010404020	4	34010404020	ES6	ES61	ES611	3799.21										100	99.9995	75.1931	1.99819	83.7125	1	1.002	4.42312	0.999094	0.837125	65.2268	1.09145	6970.51	127.79	2618.81	75.81	86.2488	0.724886	0.451554	1.97497	0.789687	0.862488	-3.9283	-0.162837	0.0894329	28.76	30	0.330033	3.30033
01-SIZ	Beires	04023	Sierra Nevada NP	Beires	ES.IGN.SIGLIM.34010404023	4	34010404023	ES6	ES61	ES611	3880.41										100	99.8999	99.7073	1.98777	88.8411	1	1.001	5.86513	0.993884	0.888411	94.9686	1.82553	5541.64	140.578	143.754	59.52	97.9036	0.576293	0.496743	0.108412	0.62	0.979036	-44.3903	-0.292961	0.0486346	27.66	-31	0.909091	0
02-BUFFER	Bentarique	04028																			100	99.9972	90.4475	2	76.1187	1	1.00198	5.32044	1	0.761187	81.672	1.49735	740.065	155.223	34.5718	60.8	2.20205	0.0769619	0.548491	0.0260723	0.633333	0.0220205	-73.8624	-0.387742	0.14013	19.12	49	0.420168	0
02-BUFFER	Berja	04029																			99.9239	99.841	14.3008	1.97335	81.6576	0.999239	1.00041	0.841222	0.986675	0.816576	-7.11753	-0.694143	1945.31	108.518	8074.26	90.06	41.7032	0.202299	0.383454	6.08919	0.938125	0.417032	60.602	0.0446888	0.244736	9.48	67	0.178412	0.892061
01-SIZ	Canjáyar	04030	Sierra Nevada NP	Canjáyar	ES.IGN.SIGLIM.34010404030	4	34010404030	ES6	ES61	ES611	6687.4										99.9888	99.4788	94.8151	1.99446	70.6867	0.999888	0.996781	5.57736	0.997228	0.706867	85.5625	1.59337	2387.49	238.558	51.7291	80.76	94.277	0.248284	0.842962	0.0390114	0.84125	0.94277	-41.7145	-0.284356	0.132385	11.1	26	0.0817661	2.45298
02-BUFFER	Dalías	04038																			99.9887	99.9535	61.0458	1.99299	90.8812	0.999887	1.00154	3.59093	0.996493	0.908812	49.9532	0.714468	2644.87	168.142	17.9009	95.81	22.9013	0.275049	0.594143	0.0134999	0.998021	0.229013	-57.8055	-0.336104	0.153588	4.24	60	0.0250878	1.00351
02-BUFFER	Enix	04041																			100	98.0912	76.8107	1.99308	90.5858	1	0.982878	4.51828	0.996541	0.905858	68.071	1.16165	761.617	107.576	20361.6	83.19	83.0321	0.0792031	0.380126	15.3556	0.866563	0.830321	250.237	0.654545	0.0717819	59.43	45	0.230415	0
02-BUFFER	Felix	04043																			100	99.9848	60.2678	1.9981	84.9122	1	1.00185	3.54517	0.99905	0.849122	47.9038	0.663884	2584.14	189.38	17.9553	80.81	77.5585	0.268733	0.669189	0.013541	0.841771	0.775585	-48.6236	-0.306575	0.0813217	44.89	37	0.151286	1.51286
01-SIZ	Fiñana	04045	Sierra Nevada NP	Fiñana	ES.IGN.SIGLIM.34010404045	4	34010404045	ES6	ES61	ES611	13385.3										99.9878	99.9658	36.0328	1.99498	86.2703	0.999878	1.00166	2.11958	0.997492	0.862703	19.6263	-0.0340568	5868.63	82.5882	711.086	86.5	90.7053	0.610298	0.291831	0.536264	0.901042	0.907053	-35.0702	-0.262988	0.120726	12.8	46	0.0496524	2.48262
01-SIZ	Fondón	04046	Sierra Nevada NP	Fondón	ES.IGN.SIGLIM.34010404046	4	34010404046	ES6	ES61	ES611	9108.82										99.9881	99.9715	85.4456	1.99228	89.6538	0.999881	1.00172	5.02621	0.996138	0.896538	78.4097	1.41683	6064.51	156.028	1000.18	87.5	89.8863	0.630669	0.551337	0.754286	0.911458	0.898863	-25.0678	-0.230821	0.0940441	43.21	26	0.299401	1.99601
02-BUFFER	Gádor	04047																			99.9013	99.493	64.7412	1.95581	86.2812	0.999013	0.996924	3.80831	0.977903	0.862812	52.8992	0.787179	342.992	80.3397	27.6758	87.54	66.4695	0.0356689	0.283886	0.0208717	0.911875	0.664695	-61.6601	-0.3485	0.172955	1.81	57	0.0329272	1.31709
02-BUFFER	Gérgal	04050																			99.9938	99.9976	26.6864	1.99693	98.2512	0.999938	1.00198	1.56979	0.998463	0.982512	11.0536	-0.245645	3327.88	165.503	9.94759	78.98	86.2563	0.346077	0.584816	0.00750195	0.822708	0.862563	-47.5267	-0.303048	0.0618328	9.42	29	0.291262	1.94175
02-BUFFER	Huécija	04051																			100	99.9708	76.8115	1.99561	83.1072	1	1.00171	4.51832	0.997803	0.831072	66.9782	1.13468	496.44	154.422	19.4422	92.82	63.3256	0.0516264	0.545659	0.0146623	0.966875	0.633256	-55.7584	-0.329521	0.148788	12.63	39	0.199601	0
02-BUFFER	Illar	04054																			100	99.9613	78.1911	1.99325	72.2362	1	1.00162	4.59948	0.996627	0.722362	66.4017	1.12045	199.813	113.938	32.6455	93.48	41.5355	0.0207792	0.402606	0.0246195	0.97375	0.415355	-63.2578	-0.353638	0.133288	0.86	22	0.26738	0
02-BUFFER	Instinción	04055																			99.9577	99.9825	89.2091	1.98895	64.889	0.999577	1.00183	5.24759	0.994475	0.64889	77.8473	1.40294	1461.36	204.135	28.2308	77.6	100	0.151972	0.721324	0.0212902	0.808333	1	-45.9416	-0.29795	0.106367	21.57	28	0.232558	2.32558
01-SIZ	Láujar de Andarax	04057	Sierra Nevada NP	Láujar de Andarax	ES.IGN.SIGLIM.34010404057	4	34010404057	ES6	ES61	ES611	9273.54										99.9839	99.9832	80.3482	1.98162	89.2388	0.999839	1.00184	4.72636	0.990808	0.892388	72.2246	1.26417	7480.75	136.872	2401.45	85.16	100	0.777949	0.483647	1.81105	0.887083	1	-0.805386	-0.152794	0.123783	34.05	50	0.0652316	2.60926
01-SIZ	Nacimiento	04065	Sierra Nevada NP	Nacimiento	ES.IGN.SIGLIM.34010404065	4	34010404065	ES6	ES61	ES611	8069.53										100	99.9049	24.2348	1.99874	98.2578	1	1.00105	1.42557	0.999368	0.982578	8.17143	-0.316783	2643.32	170.486	36.7558	88.59	100	0.274888	0.602424	0.0277193	0.922813	1	-43.4431	-0.289915	0.0716531	37.05	-8	0.210526	4.21053
01-SIZ	Ohanes	04067	Sierra Nevada NP	Ohanes	ES.IGN.SIGLIM.34010404067	4	34010404067	ES6	ES61	ES611	3238.76										100	99.8652	100	1.99519	79.384	1	1.00065	5.88235	0.997594	0.79384	93.4888	1.78901	6430.1	91.7664	165.994	70.31	90.0178	0.668688	0.324263	0.125184	0.732396	0.900178	-44.9858	-0.294876	0.133176	21.29	23	0.159744	3.19489
02-BUFFER	Padules	04071																			100	99.8732	63.1665	1.9933	69.3108	1	1.00073	3.71568	0.996651	0.693108	48.1235	0.669305	2462.24	301.845	29.4326	62.11	79.8373	0.256057	1.06659	0.0221965	0.646979	0.798373	-44.1961	-0.292337	0.125794	25.15	0	0.229358	0
01-SIZ	Paterna del Río	04073	Sierra Nevada NP	Paterna del Río	ES.IGN.SIGLIM.34010404073	4	34010404073	ES6	ES61	ES611	4544.49										99.9996	99.881	84.7686	1.9942	66.9175	0.999996	1.00081	4.98639	0.997102	0.669175	73.0694	1.28502	6187.3	170.918	1545.91	75.78	73.387	0.643438	0.603951	1.16585	0.789375	0.73387	-21.2704	-0.218609	0.0876714	12.8	20	0.274725	2.74725
01-SIZ	Rágol	04077	Sierra Nevada NP	Rágol	ES.IGN.SIGLIM.34010404077	4	34010404077	ES6	ES61	ES611	2690.09										100	99.6837	92.0493	1.99829	59.8337	1	0.998835	5.41466	0.999143	0.598337	80.2196	1.4615	2469.34	150.654	41.0432	89.19	22.2135	0.256795	0.532348	0.0309526	0.929063	0.222135	-60.5741	-0.345008	0.104137	1.4	41	0.325733	0
02-BUFFER	Santa Cruz de Marchena	04080																			100	99.9918	64.9294	1.99804	62.5277	1	1.00192	3.81937	0.999019	0.625277	48.9118	0.688764	1537.12	100.361	43.3226	81.16	100	0.15985	0.354633	0.0326717	0.845417	1	-52.1486	-0.317911	0.0966854	22.3	10	0.444444	0
02-BUFFER	Santa Fe de Mondújar	04081																			100	99.9545	77.7778	1.99733	84.8417	1	1.00155	4.57517	0.998664	0.848417	68.4759	1.17164	524.757	71.53	35.7995	62.94	100	0.0545712	0.252756	0.0269981	0.655625	1	-60.201	-0.343808	0.103961	8.89	39	0.2331	2.331
02-BUFFER	Serón	04083																			99.973	99.9668	12.4116	1.98999	89.7086	0.99973	1.00167	0.730097	0.994995	0.897086	-7.52841	-0.704284	4832.19	66.798	55.2319	85.1	90.4886	0.502516	0.236035	0.041653	0.886458	0.904886	-48.569	-0.3064	0.107726	23.57	30	0.961538	1.92308
02-BUFFER	Tabernas	04088																			99.9392	99.9886	30.7509	1.98628	94.7875	0.999392	1.00189	1.80888	0.99314	0.947875	15.0235	-0.147662	1447.94	181.638	30.2271	64.79	83.5166	0.150576	0.641832	0.0227957	0.674896	0.835166	-53.4947	-0.32224	0.103931	10.06	53	0.543626	1.08725
02-BUFFER	Terque	04091																			100	99.9959	72.3171	1.98684	91.0785	1	1.00196	4.25395	0.993419	0.910785	63.2023	1.04148	1750.83	216.659	29.9108	76.28	76.1734	0.182074	0.76558	0.0225571	0.794583	0.761734	-49.4694	-0.309295	0.151229	0	27	0.259067	0
02-BUFFER	Vícar	04102																			99.7998	99.9386	7.72959	1.89003	81.565	0.997998	1.00139	0.454682	0.945016	0.81565	-15.7053	-0.906105	808.051	56.2863	18.2614	89.84	39.0202	0.0840319	0.198892	0.0137718	0.935833	0.390202	-67.5454	-0.367427	0.483024	7.5	84	0.159052	0.238578
01-SIZ	Las Tres Villas	04901	Sierra Nevada NP	Las Tres Villas	ES.IGN.SIGLIM.34010404901	4	34010404901	ES6	ES61	ES611	8528.73										100	99.947	29.9262	1.99789	97.3398	1	1.00147	1.76036	0.998947	0.973398	14.6836	-0.156051	4154.1	196.858	43.9063	72.65	100	0.431999	0.695612	0.0331119	0.756771	1	-41.6501	-0.284149	0.07929	21.23	12	0.501672	0
02-BUFFER	Navalperal de Pinares	05161																			99.9723	99.5099	39.9238	1.9603	100	0.999723	0.997093	2.34846	0.980152	1	26.5086	0.13581	2443.94	1962.9	232.165	92.65	100	0.254153	6.93606	0.175087	0.965104	1	86.608	0.128323	0.126242	59.28	37	0.122699	1.22699
02-BUFFER	Las Navas del Marqués	05168																			99.8493	99.9841	54.0852	1.94912	100	0.998493	1.00185	3.18148	0.974562	1	43.1277	0.546	4495.14	924.92	304.087	90.19	90.7402	0.467465	3.26827	0.229326	0.939479	0.907402	16.2388	-0.0979809	0.219085	46.36	59	0.385579	0.578369
02-BUFFER	Peguerinos	05184																			99.9643	99.9653	74.348	1.97826	100	0.999643	1.00166	4.37341	0.989129	1	67.2768	1.14205	7685.04	838.456	450.823	90.7	-279.091	0.799193	2.96274	0.339987	0.944792	-2.79091	-54.8839	-0.326708	0.053804	67.52	-19	0.357143	0
02-BUFFER	Santa María del Cubillo	05902																			99.8997	98.9076	35.633	1.95663	94.132	0.998997	0.991058	2.09606	0.978314	0.94132	20.1149	-0.021996	1270.08	1999.19	88.3895	92.41	75.8392	0.13208	7.06429	0.0666588	0.962604	0.758392	79.6805	0.106044	0.0649594	42.58	33	0.647249	0
02-BUFFER	Helechosa de los Montes	06062																			99.9953	99.9922	25.6809	1.99832	98.666	0.999953	1.00193	1.51064	0.999158	0.98666	9.96673	-0.272472	7038.27	124.573	4.26657	68.84	-25.3311	0.731934	0.440188	0.00321762	0.717083	-0.253311	-67.2178	-0.366373	0.043875	52.92	34	0.300752	1.50376
02-BUFFER	Villarta de los Montes	06157																			100	99.9517	0.163367	1.99907	96.4978	1	1.00152	0.0096098	0.999535	0.964978	-20.4871	-1.02413	5734.9	671.05	10.4823	71.26	100	0.596391	2.3712	0.0079052	0.742292	1	-5.64418	-0.168356	0.0600302	44.52	-35	0.210084	2.10084
02-BUFFER	Algaida	07004																			99.976	99.5922	7.44955	1.94398	95.2755	0.99976	0.997918	0.438209	0.97199	0.952755	-12.7874	-0.834085	3154.51	74.1456	1556.28	95.4	86.9509	0.328048	0.261999	1.17366	0.99375	0.869509	-27.4606	-0.238516	0.218845	6.79	52	0.0552486	0.368324
02-BUFFER	Banyalbufar	07007																			99.9474	99.9627	96.3508	1.97362	56.9211	0.999474	1.00163	5.6677	0.986808	0.569211	84.4964	1.56706	10034.9	223.225	400.483	87.5	21.8044	1.04356	0.788782	0.302023	0.911458	0.218044	-34.7226	-0.26187	0.157506	33.18	59	0.20202	0
02-BUFFER	Bunyola	07010																			99.9169	99.9722	67.7604	1.93292	58.178	0.999169	1.00173	3.9859	0.966459	0.58178	50.7007	0.732917	6950.55	164.202	943.389	93.11	43.8353	0.722811	0.58022	0.711455	0.969896	0.438353	-31.5453	-0.251652	0.245019	19.01	70	1.53707	0.301386
02-BUFFER	Calvià	07011																			99.7391	99.5613	22.1331	1.78044	69.9499	0.997391	0.997609	1.30195	0.890219	0.699499	-2.26669	-0.574415	5876.26	258.055	12996.5	84.38	48.3974	0.611092	0.911854	9.80125	0.878958	0.483974	153.742	0.344224	0.48763	42.99	82	0.0957952	0.0611459
02-BUFFER	Campos	07013																			99.9429	99.9978	9.45428	1.9664	100	0.999429	1.00198	0.556134	0.9832	1	-9.1851	-0.745174	1831.3	65.1809	1253.2	90.78	99.5035	0.190442	0.230321	0.945096	0.945625	0.995035	-33.8696	-0.259127	0.232384	32.05	53	0.201574	0.767902
02-BUFFER	Consell	07016																			99.9233	99.9927	0	1.90393	100	0.999233	1.00193	0	0.951964	1	-20.9375	-1.03524	36.8565	2.47391	875.533	88.11	100	0.00383283	0.00874174	0.660281	0.917813	1	-48.1866	-0.30517	0.428036	13.25	64	0.0252398	0.504796
02-BUFFER	Esporles	07020																			99.8918	99.9876	79.6319	1.93278	71.0652	0.998918	1.00188	4.68423	0.966389	0.710652	67.2413	1.14117	7447.08	161.709	392.149	92.02	70.3058	0.774446	0.571409	0.295738	0.958542	0.703058	-33.9361	-0.259341	0.324046	18.34	66	0.404694	0.607042
02-BUFFER	Felanitx	07022																			99.9145	99.9333	0.134366	1.95011	94.6178	0.999145	1.00134	0.00790386	0.975053	0.946178	-21.4077	-1.04685	2238.25	81.5007	1598.94	83.19	85.1365	0.232763	0.287988	1.20584	0.866563	0.851365	-31.1097	-0.250251	0.297362	32.35	57	0.132695	0.403854
02-BUFFER	Llucmajor	07031																			99.9543	99.9584	12.5148	1.94606	97.4525	0.999543	1.00159	0.736162	0.973028	0.974525	-6.30309	-0.674041	2999.77	116.847	894.521	87.23	10.4529	0.311956	0.412889	0.674601	0.908646	0.104529	-51.7476	-0.316622	0.314209	22.98	72	0.397038	0.253428
02-BUFFER	Marratxí	07036																			99.5923	99.8601	0	1.61319	98.501	0.995923	1.0006	0	0.806597	0.98501	-24.2373	-1.11669	1849.22	43.1686	656.759	92.39	72.6339	0.192307	0.152539	0.495294	0.962396	0.726339	-49.4225	-0.309145	0.525711	6.31	81	0.118187	0
01-SIZ	Palma de Mallorca	07040	Cabrera NP	Palma de Mallorca	ES.IGN.SIGLIM.34040707040	4	34040707040	ES5	ES53	ES532	20985.3										99.497	99.901	13.3046	1.57953	86.9444	0.99497	1.00101	0.782626	0.789763	0.869444	-11.2437	-0.795984	2318.01	67.3465	72467.2	88.51	21.6603	0.241058	0.237973	0.242203	0.921979	0.216603	-62.8037	-0.352178	0.465042	7.37	69	0.391398	0.447733
02-BUFFER	Puigpunyent	07045																			99.8317	99.9851	72.099	1.93245	73.4447	0.998317	1.00185	4.24112	0.966223	0.734447	58.8392	0.933789	8140.64	217.236	413.673	93.59	35.2822	0.846572	0.767618	0.31197	0.974896	0.352822	-34.9224	-0.262513	0.188948	22.64	59	0.10015	1.0015
02-BUFFER	Sencelles	07047																			99.9636	99.9989	0	1.91026	100	0.999636	1.00199	0	0.95513	1	-20.8648	-1.03345	1849.01	53.2208	1724.39	85.03	67.3061	0.192284	0.188059	1.30044	0.885729	0.673061	-35.2085	-0.263433	0.217658	13.43	52	0.0634115	0.634115
02-BUFFER	Santa Eugènia	07053																			99.9772	99.9901	12.0343	1.92826	89.948	0.999772	1.00191	0.707898	0.964129	0.89948	-8.53631	-0.729161	3991.25	114.759	1644.09	92.84	79.1683	0.415064	0.405509	1.23989	0.967083	0.791683	-23.6154	-0.22615	0.255579	22.3	57	0.0604961	1.20992
02-BUFFER	Santa María del Camí	07056																			99.9519	99.9843	28.2569	1.93725	87.0694	0.999519	1.00185	1.66217	0.968627	0.870694	10.0571	-0.270242	2794.09	86.4419	1012.64	93.61	98.9726	0.290567	0.305448	0.763683	0.975104	0.989726	-33.5094	-0.257969	0.357619	10.35	62	0.283206	0.991221
02-BUFFER	Santanyí	07057																			99.9147	99.9885	24.4776	1.91185	97.658	0.999147	1.00189	1.43986	0.955923	0.97658	7.46797	-0.334146	2209.73	84.6484	9968.29	83.92	70.5493	0.229797	0.299111	7.51757	0.874167	0.705493	92.5227	0.147344	0.284735	19.77	64	0.211491	0.352485
01-SIZ	Ses Salines	07059	Cabrera NP	Ses Salines	ES.IGN.SIGLIM.34040707059	4	34040707059	ES5	ES53	ES532	3933.01										99.9038	99.9964	38.1853	1.92801	100	0.999038	1.00197	2.24619	0.964003	1	24.2241	0.0794249	2685.98	77.2143	10996	75.03	64.4999	0.279324	0.272842	8.29262	0.781563	0.644999	105.427	0.188844	0.31334	44.94	60	0.0411523	0.205761
02-BUFFER	Valldemossa	07063																			99.967	99.9677	83.5902	1.9686	52.1645	0.99967	1.00168	4.91707	0.984298	0.521645	68.4873	1.17192	7894.95	194.728	1684.6	93.59	53.2042	0.821022	0.688085	1.27044	0.974896	0.532042	-14.2703	-0.196097	0.193223	36.09	58	0.0512821	1.02564
02-BUFFER	Aldeacentenera	10011																			99.9928	99.9912	3.90628	1.99441	99.0358	0.999928	1.00192	0.229781	0.997206	0.990358	-15.6162	-0.903906	2110.24	456.063	153.065	82.72	76.6974	0.219451	1.61153	0.115434	0.861667	0.766974	-28.4989	-0.241855	0.0716781	34.99	4	0.164204	1.64204
02-BUFFER	Almaraz	10019																			99.2617	99.5779	12.0641	1.83751	95.9728	0.992617	0.997775	0.709653	0.918753	0.959728	-8.42948	-0.726524	1862.8	504.561	58.3522	81.5	71.795	0.193719	1.7829	0.0440062	0.848958	0.71795	-28.2493	-0.241052	0.192463	9.13	63	1.21139	0.605694
02-BUFFER	Arroyomolinos de la Vera	10022																			100	98.5238	20.0213	1.99534	87.5848	1	0.987212	1.17772	0.99767	0.875848	0.769066	-0.499487	5176.5	80.8742	228.313	92.5	100	0.538321	0.285775	0.172182	0.963542	1	-40.8036	-0.281427	0.129928	30.73	11	0.221239	2.21239
02-BUFFER	Barrado	10025																			100	98.2	47.7715	1.99488	83.782	1	0.983968	2.81009	0.997438	0.83782	32.5863	0.28582	5342.28	57.8064	262.772	93.79	100	0.555562	0.204263	0.198169	0.976979	1	-41.3005	-0.283025	0.131032	34.39	23	0.235849	0
02-BUFFER	Belvís de Monroy	10026																			99.9465	99.8423	9.80916	1.95317	96.0037	0.999465	1.00042	0.577009	0.976585	0.960037	-9.72961	-0.758614	2661.72	194.972	66.9907	86.72	100	0.276801	0.688947	0.0505209	0.903333	1	-41.608	-0.284013	0.106903	44.21	44	0.268817	0
02-BUFFER	Berzocana	10029																			99.9896	99.93	37.8499	1.99746	98.4443	0.999896	1.0013	2.22646	0.998729	0.984443	24.2167	0.0792427	4761.94	270.85	62.2096	92.78	100	0.49521	0.957066	0.0469152	0.966458	1	-30.687	-0.248892	0.0540323	38.42	4	4.43459	0
02-BUFFER	Cabañas del Castillo	10033																			100	99.9967	41.5464	1.99833	87.0284	1	1.00197	2.4439	0.999164	0.870284	26.3065	0.130822	4599.84	145.587	111.544	89.93	100	0.478353	0.514442	0.0841207	0.936771	1	-39.7263	-0.277962	0.0601181	33.1	-25	0.894855	0
02-BUFFER	Cabezabellosa	10034																			100	98.0439	57.0898	1.99721	56.6389	1	0.982403	3.35822	0.998604	0.566389	38.1124	0.422213	2198.03	231.292	285.875	87.86	100	0.228581	0.817285	0.215592	0.915208	1	-36.4667	-0.267479	0.0971346	42.32	-16	0.276243	0
02-BUFFER	Campillo de Deleitosa	10042																			100	99.8536	1.2226	1.99559	96.4574	1	1.00054	0.0719178	0.997793	0.964574	-19.3036	-0.994917	7202.53	63.7688	108.745	65.52	100	0.749015	0.225332	0.0820095	0.6825	1	-45.2229	-0.295639	0.0452512	69.91	-92	1.47059	0
02-BUFFER	Cañaveral	10045																			99.8283	96.5062	13.2387	1.95896	98.6344	0.998283	0.966996	0.778748	0.97948	0.986344	-5.80298	-0.661697	2945.73	826.531	102.786	89.76	-31.3936	0.306336	2.92061	0.0775157	0.935	-0.313936	-21.4896	-0.219314	0.106104	35.75	28	0.095511	0.95511
02-BUFFER	Casas del Castañar	10054																			99.7345	99.4069	38.3936	1.94933	79.7739	0.997345	0.996061	2.25845	0.974665	0.797739	20.4851	-0.0128598	5381.07	141.219	293.629	97.5	100	0.559595	0.499007	0.22144	1.01562	1	-34.0867	-0.259825	0.143209	57.06	27	3.367	1.6835
01-SIZ	Casas de Millán	10056	Monfragüe NP	Casas de Millán	ES.IGN.SIGLIM.34111010056	4	34111010056	ES4	ES43	ES432	15308.3										99.9578	99.1387	27.3539	1.98795	94.0875	0.999578	0.993374	1.60906	0.993974	0.940875	10.7371	-0.253458	1509.16	811.962	138.93	73.23	71.5205	0.156942	2.86912	0.104773	0.762813	0.715205	-7.82287	-0.175362	0.0596877	43	16	0.165017	1.65017
01-SIZ	Casas de Miravete	10057	Monfragüe NP	Casas de Miravete	ES.IGN.SIGLIM.34111010057	4	34111010057	ES4	ES43	ES432	5018.67										99.9829	99.9607	100.094	1.98521	100	0.999829	1.00161	5.88791	0.992607	1	97.6391	1.89144	9288.52	90.3085	665.05	57.89	19.1054	0.965944	0.319111	0.501546	0.603021	0.191054	-48.3865	-0.305813	0.0530948	9.97	-17	0.675676	0
01-SIZ	Casatejada	10058	Monfragüe NP	Casatejada	ES.IGN.SIGLIM.34111010058	4	34111010058	ES4	ES43	ES432	11187.8										99.8726	99.0091	8.24324	1.97106	100	0.998726	0.992075	0.484896	0.985529	1	-10.7755	-0.784427	1764.73	121.991	27.3577	61.95	100	0.18352	0.431064	0.0206317	0.645313	1	-54.3894	-0.325118	0.10306	55.94	50	0.0709723	0.709723
02-BUFFER	Collado de la Vera	10065																			99.9502	96.6461	5.47289	1.99186	91.3494	0.999502	0.968398	0.321935	0.995928	0.913494	-16.0149	-0.913745	5002.41	230.89	137.901	61.9	100	0.520218	0.815867	0.103997	0.644792	1	-38.3025	-0.273383	0.0538134	61.02	67	0.985222	0
02-BUFFER	Cuacos de Yuste	10068																			99.9882	98.2473	13.7359	1.986	92.5878	0.999882	0.984442	0.807996	0.992998	0.925878	-5.77605	-0.661033	5266.45	201.481	181.029	93.02	100	0.547676	0.711947	0.136522	0.968958	1	-32.6979	-0.255359	0.117735	32.8	35	0.117647	1.17647
01-SIZ	Deleitosa	10070	Monfragüe NP	Deleitosa	ES.IGN.SIGLIM.34111010070	4	34111010070	ES4	ES43	ES432	14427.9										99.9979	99.9917	10.3181	1.9954	93.2506	0.999979	1.00192	0.606944	0.997702	0.932506	-9.21896	-0.74601	4721.32	198.886	137.115	90.81	100	0.490986	0.702779	0.103405	0.945937	1	-35.1379	-0.263206	0.0675028	45.27	4	0.13369	1.3369
02-BUFFER	Fresnedoso de Ibor	10075																			99.975	99.2746	7.08568	1.99229	96.9386	0.99975	0.994735	0.416805	0.996144	0.969386	-12.4636	-0.826093	2906.12	79.4575	108.661	60.53	79.3092	0.302217	0.280769	0.0819468	0.630521	0.793092	-58.2291	-0.337466	0.0682768	0	-56	0.367647	3.67647
02-BUFFER	Galisteo	10076																			99.7596	98.6545	3.98229	1.94176	100	0.997596	0.988522	0.234252	0.970878	1	-16.1751	-0.917699	1520.55	446.522	42.2956	73.04	95.7667	0.158127	1.57782	0.0318971	0.760833	0.957667	-30.2732	-0.247561	0.11138	20.82	57	0.203046	2.03046
02-BUFFER	Gargüera	10081																			100	99.0278	5.76345	1.99864	100	1	0.992263	0.339027	0.999318	1	-13.3878	-0.848906	2920.24	910.384	145.716	83.67	100	0.303686	3.21691	0.109891	0.871563	1	10.0409	-0.117913	0.0431649	52.21	-61	0.75188	0
02-BUFFER	Garrovillas de Alconétar	10082																			99.9732	99.9378	24.5408	1.99461	100	0.999732	1.00138	1.44358	0.997307	1	8.83993	-0.300284	1236.92	2037.87	117.941	84.02	100	0.128632	7.20094	0.0889449	0.875208	1	85.8744	0.125964	0.0947775	38.92	28	0.0475737	1.42721
01-SIZ	Higuera	10097	Monfragüe NP	Higuera	ES.IGN.SIGLIM.34111010097	4	34111010097	ES4	ES43	ES432	4055.49										100	99.8469	48.3425	1.99279	90.8083	1	1.00047	2.84368	0.996395	0.908083	34.9725	0.344716	7602.37	223.186	107.897	87.1	100	0.790596	0.788644	0.0813701	0.907292	1	-28.6419	-0.242315	0.0466792	57.76	-34	1.0101	0
02-BUFFER	Hinojal	10098																			99.9521	99.9705	45.3074	1.9879	100	0.999521	1.00171	2.66514	0.99395	1	33.2064	0.301125	475.969	3469.58	160.265	77.78	100	0.0494976	12.26	0.120863	0.810208	1	184.812	0.444141	0.0749107	63.21	1	0.2457	0
02-BUFFER	Holguera	10099																			99.9902	95.3264	0	1.99095	100	0.999902	0.955174	0	0.995473	1	-20.989	-1.03652	918.577	257.972	34.2629	77.82	100	0.0955259	0.91156	0.0258393	0.810625	1	-43.129	-0.288905	0.127452	7.58	40	0.151745	1.51745
01-SIZ	Jaraicejo	10103	Monfragüe NP	Jaraicejo	ES.IGN.SIGLIM.34111010103	4	34111010103	ES4	ES43	ES432	17759.5										99.9825	99.815	82.4531	1.9889	98.9327	0.999825	1.00015	4.85018	0.994448	0.989327	76.6786	1.3741	2970.58	797.828	357.839	65.18	83.3515	0.30892	2.81918	0.269863	0.678958	0.833515	-1.79129	-0.155965	0.0500929	53.83	17	0.201207	0
02-BUFFER	Jaraíz de la Vera	10104																			99.9603	97.4079	6.76126	1.96803	84.3893	0.999603	0.976031	0.397721	0.984013	0.843893	-15.9748	-0.912755	4545.27	91.6026	153.453	87.27	83.0028	0.472678	0.323684	0.115727	0.909062	0.830028	-46.9764	-0.301278	0.290886	14.39	60	0.307031	0.921093
02-BUFFER	Jarandilla de la Vera	10105																			99.9425	99.397	4.76443	1.97693	95.6282	0.999425	0.995962	0.280261	0.988467	0.956282	-15.5921	-0.90331	7650.06	276.62	192.056	93.78	86.911	0.795556	0.977454	0.144838	0.976875	0.86911	-24.7233	-0.229713	0.201542	48.98	47	0.0346861	1.04058
02-BUFFER	Majadas	10114																			99.6994	98.3982	25.2257	1.95416	100	0.996994	0.985954	1.48387	0.977082	1	8.87795	-0.299345	4775.28	167.269	25.5305	91.74	100	0.496597	0.591056	0.0192538	0.955625	1	-38.7494	-0.27482	0.145097	5.05	68	0.0747384	0.747384
01-SIZ	Malpartida de Plasencia	10116	Monfragüe NP	Malpartida de Plasencia	ES.IGN.SIGLIM.34111010116	4	34111010116	ES4	ES43	ES432	37296.9										99.9523	99.5876	45.8007	1.98979	99.9746	0.999523	0.997872	2.69416	0.994896	0.999746	33.7239	0.313897	2530.56	951.721	79.2732	88.79	99.7124	0.263161	3.36297	0.0597837	0.924896	0.997124	12.1588	-0.111102	0.104335	18.42	59	0.0216967	0.867867
02-BUFFER	Mesas de Ibor	10120																			100	99.9156	16.3325	1.99743	100	1	1.00116	0.960738	0.998717	1	-0.787747	-0.537912	1632.03	115.129	96.2258	74.29	100	0.16972	0.406815	0.0725684	0.773854	1	-51.5408	-0.315957	0.0541753	61.57	-44	0.574713	0
02-BUFFER	Millanes	10122																			99.9828	99.8162	0	1.96949	100	0.999828	1.00016	0	0.984743	1	-20.3053	-1.01964	1638.72	29.1745	59.5217	71.05	48.8943	0.170416	0.10309	0.0448881	0.740104	0.488943	-69.0512	-0.372269	0.108144	41.87	13	0.414938	0
01-SIZ	Mirabel	10123	Monfragüe NP	Mirabel	ES.IGN.SIGLIM.34111010123	4	34111010123	ES4	ES43	ES432	4935.25										99.9453	99.9685	48.4915	1.98685	91.2422	0.999453	1.00169	2.85244	0.993426	0.912422	35.1886	0.35005	4807.92	1413.23	55.0966	74.22	100	0.499991	4.99376	0.041551	0.773125	1	46.1686	-0.00172832	0.106923	48.19	23	0.149477	1.49477
02-BUFFER	Monroy	10125																			99.9955	99.9856	2.58195	1.99731	99.9801	0.999955	1.00186	0.15188	0.998655	0.999801	-16.957	-0.936999	2050.66	121.693	113.707	87.56	100	0.213255	0.430012	0.0857519	0.912083	1	-47.178	-0.301926	0.0655918	40.07	39	0.100908	0
02-BUFFER	Navalmoral de la Mata	10131																			99.9294	97.1334	1.03633	1.95707	100	0.999294	0.97328	0.0609604	0.978535	1	-19.7586	-1.00615	1807.08	447.142	29.5602	84.93	93.3993	0.187924	1.58001	0.0222928	0.884688	0.933993	-27.8219	-0.239678	0.303888	8.63	72	0.693762	0.809389
02-BUFFER	Pasarón de la Vera	10138																			100	97.7351	8.62644	1.9947	89.3746	1	0.979309	0.507437	0.997349	0.893746	-12.4432	-0.825589	4252.19	363.552	192.203	82.14	100	0.4422	1.28464	0.144949	0.855625	1	-25.4518	-0.232056	0.116997	27.79	24	0.153139	0
02-BUFFER	Pedroso de Acim	10139																			99.9327	95.8561	35.8186	1.98834	100	0.999327	0.960482	2.10698	0.994168	1	21.2191	0.00525716	4116.6	417.076	38.5943	81.82	100	0.428099	1.47377	0.0291058	0.852292	1	-24.3347	-0.228463	0.0525114	54.31	-38	1.05263	0
02-BUFFER	Plasencia	10148																			99.8688	99.5121	11.0496	1.94593	93.5787	0.998688	0.997115	0.649978	0.972963	0.935787	-8.90936	-0.738369	1909.79	1156.45	101.136	84.1	2.36091	0.198605	4.08638	0.0762714	0.876042	0.0236091	5.21812	-0.133423	0.397923	11.76	67	0.896928	0.792864
02-BUFFER	Portezuelo	10151																			99.9874	99.9608	37.5763	1.99745	100	0.999874	1.00161	2.21037	0.998725	1	24.2115	0.0791159	1949.63	888.95	99.4815	50.54	100	0.202749	3.14117	0.0750238	0.526458	1	-1.09206	-0.153716	0.0401343	51.97	6	0.4329	4.329
02-BUFFER	Riolobos	10155																			99.9864	99.0482	2.83764	1.99177	97.5023	0.999864	0.992467	0.16692	0.995884	0.975023	-17.3969	-0.947855	1404.02	181.264	39.0434	71.31	100	0.146009	0.640509	0.0294445	0.742812	1	-48.8245	-0.307221	0.148694	8.07	52	0.0789889	0.789889
02-BUFFER	Robledollano	10159																			99.9756	98.8281	29.3335	1.99437	63.0178	0.999756	0.990261	1.7255	0.997183	0.630178	6.85759	-0.349211	4578.12	161.12	108.735	93.71	100	0.476094	0.56933	0.0820024	0.976146	1	-37.9285	-0.272181	0.0685897	4.83	7	0.306748	0
01-SIZ	Romangordo	10160	Monfragüe NP	Romangordo	ES.IGN.SIGLIM.34111010160	4	34111010160	ES4	ES43	ES432	3908.64										99.9883	99.229	23.4335	1.9396	100	0.999883	0.994278	1.37844	0.969799	1	6.84807	-0.349446	4804.56	163.612	89.8016	91.67	100	0.499642	0.578135	0.0677237	0.954896	1	-37.9921	-0.272385	0.0728204	46.94	-53	0.401606	0
02-BUFFER	Santiago del Campo	10170																			99.9857	99.8557	33.0239	1.9952	100	0.999857	1.00056	1.94258	0.9976	1	18.8119	-0.0541562	644.131	955.596	159.54	86.6	100	0.0669854	3.37667	0.120317	0.902083	1	9.32103	-0.120228	0.0567804	51.47	-11	0.363636	0
01-SIZ	Saucedilla	10173	Monfragüe NP	Saucedilla	ES.IGN.SIGLIM.34111010173	4	34111010173	ES4	ES43	ES432	6044.44										99.9227	95.0893	16.6424	1.97185	100	0.999227	0.952799	0.978967	0.985925	1	-1.66165	-0.559482	401.74	201.242	28.6018	72.61	100	0.0417783	0.711101	0.02157	0.756354	1	-49.3839	-0.30902	0.1075	0	61	0.112867	1.12867
01-SIZ	Serradilla	10175	Monfragüe NP	Serradilla	ES.IGN.SIGLIM.34111010175	4	34111010175	ES4	ES43	ES432	25942.8										99.9968	99.8266	99.8216	1.99783	90.3261	0.999968	1.00027	5.87186	0.998917	0.903261	95.4854	1.83829	4876.99	401.841	439.857	68.88	99.7098	0.507175	1.41993	0.331718	0.7175	0.997098	-20.5315	-0.216233	0.0731844	49.89	31	1.24378	1.24378
01-SIZ	Serrejón	10176	Monfragüe NP	Serrejón	ES.IGN.SIGLIM.34111010176	4	34111010176	ES4	ES43	ES432	12423.1										100	99.9639	91.4832	1.99793	99.0912	1	1.00164	5.38137	0.998965	0.990912	87.4577	1.64015	4221.96	393.459	563.051	75.49	100	0.439056	1.39031	0.424624	0.786354	1	-19.193	-0.211928	0.0538282	0.36	40	0.230947	0
02-BUFFER	Talaván	10178																			99.9914	99.8998	36.6373	1.99583	100	0.999914	1.001	2.15513	0.997917	1	23.0793	0.0511688	906.649	1542.63	138.708	85.57	98.3979	0.0942854	5.45098	0.104606	0.891354	0.983979	50.504	0.0122142	0.0866711	41.97	7	2.3753	2.3753
02-BUFFER	Talayuela	10180																			99.9213	99.3943	19.4752	1.97059	100	0.999213	0.995935	1.1456	0.985294	1	2.52081	-0.456251	2433.65	665.775	23.92	86.59	60.0387	0.253083	2.35256	0.0180393	0.901979	0.600387	-17.479	-0.206416	0.206531	5.47	81	0.327065	0.545108
02-BUFFER	Tejeda de Tiétar	10181																			99.8773	99.2314	6.21006	1.97653	100	0.998773	0.994302	0.365298	0.988267	1	-13.0672	-0.840992	2680.94	648.919	64.2543	97.95	100	0.2788	2.293	0.0484572	1.02031	1	-7.18864	-0.173322	0.115233	14.44	44	0.249377	1.24688
01-SIZ	Toril	10182	Monfragüe NP	Toril	ES.IGN.SIGLIM.34111010182	4	34111010182	ES4	ES43	ES432	14986										99.9418	99.9341	68.3973	1.9904	100	0.999418	1.00134	4.02337	0.995202	1	60.3866	0.971983	2501.94	191.973	324.646	65.74	100	0.260186	0.678348	0.244831	0.684792	1	-42.6369	-0.287322	0.0305598	0.78	83	0.588235	0
02-BUFFER	El Torno	10184																			99.981	98.7683	32.4059	1.98966	77.6254	0.99981	0.989663	1.90623	0.994832	0.776254	13.3357	-0.18932	3695.59	344.104	295.004	96.45	100	0.384316	1.21592	0.222477	1.00469	1	-23.4521	-0.225625	0.184485	29.6	22	0.111483	2.22965
02-BUFFER	Torrecillas de la Tiesa	10186																			99.9886	99.7019	5.57892	1.98873	100	0.999886	0.999017	0.328172	0.994364	1	-13.5712	-0.853432	1498.88	831.291	160.147	75.58	99.9953	0.155874	2.93742	0.120775	0.787292	0.999953	0.026313	-0.15012	0.0836475	37.5	37	0.0906618	0.906618
01-SIZ	Torrejón el Rubio	10190	Monfragüe NP	Torrejón el Rubio	ES.IGN.SIGLIM.34111010190	4	34111010190	ES4	ES43	ES432	22205.9										99.9929	99.8898	99.9739	1.99802	98.0392	0.999929	1.0009	5.88082	0.999009	0.980392	97.2209	1.88112	2999.81	166.222	360.035	78.31	92.6464	0.31196	0.587358	0.27152	0.815729	0.926464	-41.7394	-0.284436	0.0466904	33.33	33	0.168634	1.68634
02-BUFFER	Trujillo	10195																			99.9481	99.6581	18.5114	1.98253	100	0.999481	0.998578	1.08891	0.991263	1	1.5646	-0.479852	1237.66	2390.15	151.114	87.71	73.3329	0.128708	8.44577	0.113962	0.913646	0.733329	106.708	0.192964	0.115594	15.22	53	0.237222	0.754798
02-BUFFER	Valdecañas de Tajo	10197																			100	99.7342	23.9417	1.99178	99.9614	1	0.99934	1.40834	0.995892	0.999614	8.06365	-0.319444	3944.82	72.8582	108.077	76.47	-109.327	0.410235	0.257449	0.0815062	0.796562	-1.09327	-90.9503	-0.442696	0.0711701	50.44	48	0.813008	0
02-BUFFER	Valdehúncar	10199																			99.9616	99.9732	6.83359	1.98511	100	0.999616	1.00174	0.401976	0.992557	1	-12.0823	-0.816682	1232.49	47.8157	39.0539	91.55	94.2872	0.128171	0.16896	0.0294524	0.953646	0.942872	-55.538	-0.328812	0.0794028	26.15	-11	0.558659	0
02-BUFFER	Chipiona	11016																			99.1363	99.7542	0	1.70605	100	0.991363	0.999541	0	0.853027	1	-23.1214	-1.08915	61.0771	5.87954	231338	69.3	-133.645	0.00635161	0.0207758	0.773187	0.721875	-1.33645	-96.2851	-0.459852	0.512278	61.76	75	0.109925	0.680486
02-BUFFER	Sanlúcar de Barrameda	11032																			99.4705	99.8818	22.498	1.8714	100	0.994705	1.00082	1.32341	0.9357	1	5.09273	-0.392771	112.685	7.48281	69082.8	68.35	8.56285	0.0117185	0.026441	0.230892	0.711979	0.0856285	-78.6668	-0.403193	0.519144	15.65	75	0.211413	0.561798
02-BUFFER	Trebujena	11037																			99.9708	100	2.54466	1.98109	93.384	0.999708	1.002	0.149686	0.990546	0.93384	-18.4843	-0.974696	0	0	2039.42	63.81	-39.8081	0	0	1.53803	0.664687	-0.398081	-63.9073	-0.355727	0.284728	5.27	68	0.282925	1.1317
01-SIZ	Alcoba	13006	Cabañeros NP	Alcoba	ES.IGN.SIGLIM.34081313006	4	34081313006	ES4	ES42	ES422	30695.9										99.999	99.8251	54.2532	1.99762	98.1833	0.99999	1.00025	3.19136	0.99881	0.981833	43.4449	0.553831	2887.11	8.5404	78.7245	88.56	29.6111	0.30024	0.0301781	0.0593699	0.9225	0.296111	-67.832	-0.368349	0.0440601	28.8	16	3.27869	1.63934
02-BUFFER	Almagro	13013																			99.8794	99.793	4.8158	1.96775	98.9522	0.998794	0.99993	0.283282	0.983874	0.989522	-14.8919	-0.88603	573.807	40.3185	394.461	87.99	50.8438	0.0596721	0.142468	0.297482	0.916562	0.508438	-61.5075	-0.348009	0.178031	6.98	62	0.222643	1.00189
02-BUFFER	Anchuras	13017																			99.9939	99.6433	11.3569	1.99786	87.7229	0.999939	0.99843	0.668054	0.998932	0.877229	-9.14831	-0.744266	4689.6	73.1454	15.6667	90.98	100	0.487687	0.258464	0.011815	0.947708	1	-45.8865	-0.297773	0.0344695	44.1	2	1.23839	0
02-BUFFER	Arenas de San Juan	13018																			99.9188	92.795	0	1.98052	100	0.999188	0.92981	0	0.990262	1	-21.6148	-1.05196	64.3245	1.42399	721.154	77.99	99.9429	0.00668932	0.00503178	0.543857	0.812396	0.999429	-52.6519	-0.31953	0.118819	10.23	48	0.0951475	0.951475
02-BUFFER	Bolaños de Calatrava	13023																			99.7567	99.5419	0	1.93702	99.5237	0.997567	0.997414	0	0.968512	0.995237	-20.8254	-1.03248	459.013	8.10251	464.42	89.03	51.0633	0.0477343	0.0286308	0.350241	0.927396	0.510633	-62.7073	-0.351868	0.331104	9.37	64	0.168322	0.757448
02-BUFFER	Carrión de Calatrava	13031																			99.9898	98.5251	0	1.98107	100	0.999898	0.987225	0	0.990536	1	-20.4468	-1.02313	246.377	8.14326	656.001	86.61	91.1912	0.0256216	0.0287748	0.494722	0.902188	0.911912	-52.7356	-0.319799	0.160807	22.49	58	0.651678	0.977517
02-BUFFER	Los Cortijos	13036																			99.9711	99.9875	0.65213	1.98918	84.6296	0.999711	1.00188	0.0383606	0.994589	0.846296	-22.3833	-1.07093	3106.69	45.2254	270.051	89.32	100	0.323075	0.159807	0.203658	0.930417	1	-47.6609	-0.303479	0.0913271	39.51	14	0.110619	0
01-SIZ	Daimiel	13039	Tablas de Daimiel NP	Daimiel	ES.IGN.SIGLIM.34081313039	4	34081313039	ES4	ES42	ES422	43797.8										99.9508	37.0264	4.31164	1.97514	100	0.999508	0.371006	0.253626	0.987572	1	-27.7658	-1.20378	49.8103	2.85659	961.958	86.98	30.6998	0.00517994	0.010094	0.725458	0.906042	0.306998	-60.9246	-0.346135	0.0427946	7.9	55	0.22007	0.660211
02-BUFFER	Fernán Caballero	13040																			99.9769	99.9106	13.7681	1.99102	99.8743	0.999769	1.00111	0.809889	0.995508	0.998743	-3.89966	-0.61472	1443.45	16.5175	191.987	80.76	100	0.15011	0.0583657	0.144786	0.84125	1	-56.1098	-0.33065	0.093585	40.76	28	0.097371	1.94742
02-BUFFER	Fontanarejo	13041																			99.9903	99.7759	0.137983	1.99568	92.3309	0.999903	0.999758	0.00811662	0.99784	0.923309	-21.4215	-1.04719	3684.02	42.603	33.8044	59.52	86.0433	0.383114	0.150541	0.0254936	0.62	0.860433	-59.2084	-0.340615	0.056974	23.81	-26	0.377358	0
02-BUFFER	Fuente el Fresno	13044																			99.974	99.5914	0.1758	1.9805	89.1814	0.99974	0.997909	0.0103412	0.990252	0.891814	-22.1989	-1.06638	2004.3	31.3722	215.221	88.71	99.5111	0.208434	0.110856	0.162308	0.924063	0.995111	-51.9846	-0.317384	0.157655	20.5	47	0.0906071	0.604047
02-BUFFER	Herencia	13047																			99.9742	99.586	1.86274	1.97412	98.7332	0.999742	0.997856	0.109573	0.987058	0.987332	-18.3688	-0.971844	738.379	15.5712	452.261	89.4	94.218	0.0767865	0.0550219	0.341071	0.93125	0.94218	-53.0738	-0.320887	0.184641	17.83	53	0.23722	0.948879
01-SIZ	Horcajo de los Montes	13049	Cabañeros NP	Horcajo de los Montes	ES.IGN.SIGLIM.34081313049	4	34081313049	ES4	ES42	ES422	20836.9										99.9968	99.9854	34.6451	1.99701	90.1549	0.999968	1.00186	2.03795	0.998503	0.901549	18.7965	-0.0545372	4831.66	45.1849	53.3675	83.33	100	0.502461	0.159664	0.040247	0.868021	1	-48.5922	-0.306474	0.0633501	17.77	30	0.106952	2.13904
02-BUFFER	Las Labores	13050																			99.8402	99.2344	0	1.96835	100	0.998402	0.994332	0	0.984173	1	-20.4619	-1.02351	328.083	1.55288	576.598	79.9	100	0.0341184	0.0054872	0.43484	0.832292	1	-53.8652	-0.323432	0.124077	24.8	37	0.172414	0
02-BUFFER	Malagón	13052																			99.9213	99.8502	1.31534	1.97791	82.0779	0.999213	1.0005	0.0773731	0.988956	0.820779	-22.2635	-1.06797	1189.83	24.3114	264.057	90.02	46.263	0.123734	0.085906	0.199138	0.937708	0.46263	-63.8177	-0.355439	0.1444	25.65	39	0.296004	0.616675
02-BUFFER	Manzanares	13053																			99.9552	99.9898	0	1.96499	99.8324	0.999552	1.0019	0	0.982493	0.998324	-20.3546	-1.02086	97.9109	8.03889	777.194	88.07	64.4269	0.0101821	0.028406	0.586119	0.917396	0.644269	-56.2726	-0.331174	0.193538	6.75	62	0.768977	0.933758
02-BUFFER	Miguelturra	13056																			99.9659	99.8798	12.5164	1.9489	100	0.999659	1.0008	0.736261	0.974451	1	-5.77659	-0.661046	1346.79	50.7367	276.151	87.34	88.585	0.140058	0.179282	0.208259	0.909792	0.88585	-53.5352	-0.322371	0.317949	8.67	73	0.131363	0.853859
02-BUFFER	Moral de Calatrava	13058																			99.9771	99.1803	0.627224	1.98883	96.9674	0.999771	0.99379	0.0368955	0.994415	0.969674	-20.1091	-1.0148	730.594	21.0353	179.112	90.2	100	0.0759769	0.0743295	0.135077	0.939583	1	-55.5007	-0.328692	0.158934	25.46	41	0.376719	0.941797
02-BUFFER	Navalpino	13059																			99.9934	99.9434	9.7254	1.99797	85.0986	0.999934	1.00144	0.572082	0.998985	0.850986	-11.5315	-0.803088	5306.93	47.7521	62.8626	76.39	29.5005	0.551885	0.168735	0.0474077	0.795729	0.295005	-62.8247	-0.352245	0.0323176	37.12	-27	0.4329	0
01-SIZ	Navas de Estena	13060	Cabañeros NP	Navas de Estena	ES.IGN.SIGLIM.34081313060	4	34081313060	ES4	ES42	ES422	14648.5										99.9937	99.6868	73.9708	1.99741	100	0.999937	0.998866	4.35122	0.998704	1	66.9746	1.13459	7855.54	26.0418	103.71	84.68	100	0.816923	0.0920205	0.078213	0.882083	1	-42.6152	-0.287253	0.04174	30.4	-4	0.406504	0
02-BUFFER	Piedrabuena	13063																			99.993	99.8356	7.61905	1.99461	91.6095	0.99993	1.00036	0.44818	0.997304	0.916095	-12.7627	-0.833476	3619.1	39.3398	37.1381	89.55	100	0.376362	0.13901	0.0280076	0.932812	1	-50.4762	-0.312533	0.0855038	32.8	45	0.442772	0.885544
02-BUFFER	Porzuna	13065																			99.9738	99.9743	2.86805	1.98537	91.2619	0.999738	1.00175	0.168709	0.992683	0.912619	-18.4901	-0.974839	646.826	16.532	104.436	89.37	88.5549	0.0672656	0.0584169	0.0787601	0.930938	0.885549	-59.5814	-0.341815	0.125356	24.91	39	0.60556	1.10102
02-BUFFER	Pozuelo de Calatrava	13066																			99.9397	99.8147	18.8473	1.98107	100	0.999397	1.00015	1.10866	0.990534	1	1.97485	-0.469726	378.203	19.885	199.467	91.07	80.5616	0.0393306	0.070265	0.150428	0.948646	0.805616	-59.7143	-0.342242	0.16551	11.2	63	0.0295683	0.887049
02-BUFFER	Puerto Lápice	13070																			99.7192	99.6768	0.0092714	1.92873	100	0.997192	0.998766	0.000545377	0.964366	1	-20.7826	-1.03142	1073.53	22.9361	309.579	85.39	100	0.11164	0.0810462	0.233468	0.889479	1	-53.6873	-0.32286	0.122422	30.49	38	0.105597	0
01-SIZ	Retuerta del Bullaque	13072	Cabañeros NP	Retuerta del Bullaque	ES.IGN.SIGLIM.34081313072	4	34081313072	ES4	ES42	ES422	65356.4										99.9934	99.9662	43.4618	1.9981	96.8407	0.999934	1.00167	2.55658	0.999051	0.968407	30.5127	0.234639	3729.71	82.9721	154.263	88.86	100	0.387865	0.293188	0.116337	0.925625	1	-45.5397	-0.296658	0.0369774	41.04	38	2.11907	1.00908
01-SIZ	Torralba de Calatrava	13083	Tablas de Daimiel NP	Torralba de Calatrava	ES.IGN.SIGLIM.34081313083	4	34081313083	ES4	ES42	ES422	10151.3										99.9541	99.8936	0	1.96412	100	0.999541	1.00094	0	0.98206	1	-20.3492	-1.02073	91.6018	1.01508	834.704	88.82	-13.686	0.00952598	0.00358684	0.62949	0.925208	-0.13686	-71.381	-0.379762	0.159798	29.71	34	0.0332668	0.998004
01-SIZ	Villarrubia de los Ojos	13096	Tablas de Daimiel NP	Villarrubia de los Ojos	ES.IGN.SIGLIM.34081313096	4	34081313096	ES4	ES42	ES422	28164.8										99.9957	99.7233	31.2431	1.98902	100	0.999957	0.999231	1.83783	0.994508	1	16.6305	-0.107999	1757.72	20.1952	340.111	85.81	55.7801	0.182791	0.0713611	0.256494	0.893854	0.557801	-60.754	-0.345586	0.183638	9.61	55	0.199481	0.598444
02-BUFFER	Villarta de San Juan	13097																			99.9007	95.959	0	1.94315	100	0.999007	0.961513	0	0.971577	1	-21.358	-1.04562	171.578	32.6292	734.147	92.78	86.3671	0.0178429	0.115298	0.553656	0.966458	0.863671	-49.6615	-0.309913	0.194175	6.68	56	0.698568	0.698568
02-BUFFER	El Robledo	13901																			99.9962	99.9728	2.33439	1.99222	97.2341	0.999962	1.00173	0.137317	0.996111	0.972341	-17.8508	-0.959058	614.559	12.6163	66.0285	94.68	79.2262	0.06391	0.0445807	0.0497952	0.98625	0.792262	-61.264	-0.347226	0.0976669	45.02	39	0.090009	1.80018
02-BUFFER	Boiro	15011																			99.7264	96.2744	0	1.9329	92.5343	0.997264	0.964673	0	0.966452	0.925343	-22.9254	-1.08431	33483.3	95.7771	56325.9	87.06	74.5309	3.48204	0.338435	0.188255	0.906875	0.745309	13.2182	-0.107695	0.40426	7.66	62	0.211808	0.105904
02-BUFFER	A Pobra do Caramiñal	15067																			99.6622	98.6321	1.12032	1.82441	95.889	0.996622	0.988297	0.0659013	0.912204	0.95889	-21.5617	-1.05065	32078.7	109.92	72233	87.01	78.8186	3.33597	0.388408	0.241421	0.906354	0.788186	13.2068	-0.107732	0.442473	14.12	56	0.211864	0.529661
02-BUFFER	Porto do Son	15071																			99.7782	96.7586	5.59918	1.96004	97.5696	0.997782	0.969525	0.329363	0.98002	0.975696	-14.9523	-0.887519	25352.2	133.953	59329.6	90.87	77.5691	2.63646	0.473332	0.198294	0.946563	0.775691	0.606815	-0.148253	0.28606	22.51	54	0.442239	0.32359
02-BUFFER	Rianxo	15072																			99.5946	95.9625	0.380457	1.92685	92.5717	0.995946	0.961548	0.0223798	0.963423	0.925717	-22.6197	-1.07677	39937.7	135.797	55678.4	84.51	95.0327	4.15326	0.479847	0.186091	0.880313	0.950327	32.9967	-0.0440883	0.383663	3.88	53	0.187701	0.0893815
01-SIZ	Ribeira	15073	Islas Atlánticas de Galicia NP	Ribeira	ES.IGN.SIGLIM.34121515073	4	34121515073	ES1	ES11	ES111	6833.37										99.7243	96.8159	19.4866	1.88366	95.4613	0.997243	0.970099	1.14627	0.941829	0.954613	0.201134	-0.513505	20379.7	46.2165	135842	90.31	76.7737	2.11935	0.163309	0.454017	0.940729	0.767737	-11.0971	-0.185892	0.492436	19.91	62	0.662764	0
02-BUFFER	Albuñán	18005																			100	99.5248	0	1.97346	100	1	0.997243	0	0.986728	1	-20.3206	-1.02002	145.249	4.65212	4254.96	60.67	100	0.0151049	0.0164386	3.20887	0.631979	1	-2.55224	-0.158412	0.200671	25.07	35	0.239234	0
02-BUFFER	Albuñuelas	18007																			100	99.9942	0.18448	1.99952	68.4147	1	1.00195	0.0108517	0.999759	0.684147	-26.0659	-1.16182	3341.57	77.1695	209.176	36.12	100	0.347501	0.272684	0.15775	0.37625	1	-56.9163	-0.333244	0.0743213	12.48	31	0.119617	3.58852
01-SIZ	Aldeire	18010	Sierra Nevada NP	Aldeire	ES.IGN.SIGLIM.34011818010	4	34011818010	ES6	ES61	ES614	7001.51										99.4149	99.9997	59.7563	1.89761	79.3148	0.994149	1.002	3.51508	0.948807	0.793148	45.0636	0.593784	3478.48	51.5778	1746.37	58.87	44.7211	0.361739	0.182254	1.31702	0.613229	0.447211	-41.571	-0.283894	0.087881	47.33	18	0.15748	0
02-BUFFER	Alhendín	18014																			99.1196	99.758	0	1.78913	39.7927	0.991196	0.999579	0	0.894564	0.397927	-34.3347	-1.36591	609.277	38.2384	973.113	84.99	-5.6235	0.0633607	0.135118	0.733871	0.885312	-0.056235	-64.7714	-0.358506	0.339651	8.06	69	0.0112007	0.560036
02-BUFFER	Almegíjar	18016																			99.9636	99.9815	0.162291	1.98683	27.0699	0.999636	1.00182	0.00954654	0.993416	0.270699	-34.4977	-1.36993	1088.98	87.7942	12410	65.55	100	0.113246	0.310227	9.359	0.682812	1	129.306	0.265636	0.106574	28.46	-4	0.552486	0
02-BUFFER	Alquife	18018																			99.8544	99.9972	0.817075	1.59147	100	0.998544	1.00198	0.0480632	0.795735	1	-23.1136	-1.08896	1404.3	42.3366	2393.69	69.77	55.4298	0.146038	0.149599	1.8052	0.726771	0.554298	-32.3619	-0.254279	0.218131	17.06	41	3.00752	3.00752
02-BUFFER	Armilla	18021																			99.2365	sin dato	0	1.25222	100	0.992365	sin dato	0	0.626112	1	-34.5381	-1.37093	0	0	88.6112	79.91	29.5109	0	0	0.066826	0.832396	0.295109	-76.1134	-0.394981	0.0158451	2.36	76	0.0832362	0.624272
02-BUFFER	Baza	18023																			99.975	99.9809	61.2495	1.98107	93.9234	0.99975	1.00181	3.60291	0.990535	0.939234	50.6849	0.732526	2795.33	71.1976	1203.32	83.06	16.7573	0.290696	0.251582	0.907481	0.865208	0.167573	-50.3492	-0.312125	0.191762	5.89	62	0.595872	1.06579
02-BUFFER	Beas de Granada	18024																			99.951	99.9843	54.7589	1.97368	57.1997	0.99951	1.00185	3.22111	0.986841	0.571997	35.6261	0.360848	2621.08	48.2279	20.8731	87.04	100	0.272575	0.170417	0.0157414	0.906667	1	-52.692	-0.319659	0.189262	4.66	60	0.1	2
02-BUFFER	Beas de Guadix	18025																			100	99.9748	0	1.9951	69.5198	1	1.00175	0	0.997552	0.695198	-26.11	-1.16291	1673.01	38.1612	1907.16	46.3	100	0.173982	0.134845	1.43828	0.482292	1	-35.412	-0.264087	0.137792	19.34	37	0.289855	2.89855
01-SIZ	Bérchules	18030	Sierra Nevada NP	Bérchules	ES.IGN.SIGLIM.34011818030	4	34011818030	ES6	ES61	ES614	6953.05										100	99.975	95.3802	1.99565	100	1	1.00175	5.6106	0.997825	1	92.2036	1.75728	3631.82	254.795	1127.14	68.09	66.1376	0.377685	0.900336	0.850027	0.709271	0.661376	-30.0261	-0.246767	0.097282	47.72	47	0.13986	2.7972
01-SIZ	Bubión	18032	Sierra Nevada NP	Bubión	ES.IGN.SIGLIM.34011818032	4	34011818032	ES6	ES61	ES614	1485.18										100	99.9989	100	1.9906	100	1	1.00199	5.88235	0.9953	1	97.5929	1.8903	3782.86	182.803	243.691	78.67	32.6983	0.393392	0.645947	0.183779	0.819479	0.326983	-52.6084	-0.31939	0.136775	30.8	68	0.332226	0
01-SIZ	Busquístar	18033	Sierra Nevada NP	Busquístar	ES.IGN.SIGLIM.34011818033	4	34011818033	ES6	ES61	ES614	1801.73										99.9205	99.8093	93.3477	1.97052	100	0.999205	1.00009	5.49104	0.98526	1	89.512	1.69085	6120.87	125.883	1760.37	64.43	100	0.63653	0.444817	1.32758	0.671146	1	-18.3986	-0.209373	0.121069	23.04	56	0.359712	0
02-BUFFER	Cádiar	18035																			99.9791	99.533	1.61118	1.98913	39.1798	0.999791	0.997325	0.0947756	0.994564	0.391798	-30.4349	-1.26966	1181.1	53.9643	10187.8	55.9	23.7732	0.122826	0.190687	7.6831	0.582292	0.237732	76.3328	0.0952784	0.166563	23.59	35	0.0672948	2.69179
02-BUFFER	Cájar	18036																			99.7467	100	0.873571	1.24502	99.5108	0.997467	1.002	0.0513866	0.62251	0.995108	-26.6305	-1.17576	21.3395	2.03086	90.6975	86.57	100	0.00221917	0.0071762	0.0683993	0.901771	1	-60.4087	-0.344476	0.0470239	13.54	74	0.0395726	0.791452
01-SIZ	Cáñar	18040	Sierra Nevada NP	Cáñar	ES.IGN.SIGLIM.34011818040	4	34011818040	ES6	ES61	ES614	2632.54										100	99.9271	91.8633	1.99828	100	1	1.00127	5.40373	0.99914	1	88.0828	1.65557	2547.89	191.283	1735.22	55.86	100	0.264964	0.675913	1.30862	0.581875	1	-23.3727	-0.225369	0.113929	0.36	31	0.287356	0
01-SIZ	Capileira	18042	Sierra Nevada NP	Capileira	ES.IGN.SIGLIM.34011818042	4	34011818042	ES6	ES61	ES614	5685.01										99.9748	99.9957	100	1.99382	96.1611	0.999748	1.00196	5.88235	0.996908	0.961611	96.8516	1.87201	1300.06	342.808	276.127	81.22	100	0.135198	1.21134	0.208241	0.846042	1	-31.9837	-0.253062	0.0886946	14.91	60	0.178891	1.78891
02-BUFFER	Carataunas	18043																			100	99.9643	3.24773	1.97556	86.623	1	1.00165	0.191043	0.98778	0.86623	-19.066	-0.989053	1445.51	62.9058	17826.2	65.52	100	0.150323	0.222282	13.4436	0.6825	1	209.975	0.525064	0.177195	2.03	48	0.558659	0
02-BUFFER	Cástaras	18044																			100	99.9602	9.16718	1.99691	48.1597	1	1.00161	0.539246	0.998453	0.481597	-19.582	-1.00179	1780.89	338.991	10351.1	66.23	100	0.185201	1.19785	7.80623	0.689896	1	117.584	0.227939	0.0887	40.4	5	0.819672	0
02-BUFFER	Cenes de la Vega	18047																			99.7101	96.6136	0.176851	1.84049	92.0978	0.997101	0.968073	0.010403	0.920243	0.920978	-23.664	-1.10254	2045.76	52.0744	13.186	79.79	84.3702	0.212746	0.184009	0.00994423	0.831146	0.843702	-58.3691	-0.337916	0.387067	11.13	88	0.253261	0.379891
02-BUFFER	Cogollos de Guadix	18049																			99.8761	99.9967	47.1598	1.9568	100	0.998761	1.00197	2.7741	0.978399	1	35.0647	0.346991	1760.46	38.5332	2142.69	73.18	20.0317	0.183076	0.13616	1.61591	0.762292	0.200317	-42.045	-0.285419	0.139621	34.13	26	0.151745	1.51745
02-BUFFER	Cortes y Graena	18054																			99.932	99.9073	0	1.9473	23.5825	0.99932	1.00107	0	0.97365	0.235825	-35.8026	-1.40214	1366.49	51.6785	845.78	54	-4.30577	0.142106	0.18261	0.637843	0.5625	-0.0430577	-70.36	-0.376478	0.193954	29.06	42	0.402414	0
02-BUFFER	Cúllar Vega	18057																			99.4441	100	0	1.49955	98.7988	0.994441	1.002	0	0.749777	0.987988	-25.3158	-1.14331	163.06	0.270642	285.22	88.95	41.1592	0.0169571	0.000956333	0.215098	0.926563	0.411592	-68.5767	-0.370743	0.265005	10.36	82	0.0136426	1.09141
02-BUFFER	Churriana de la Vega	18062																			99.8128	sin dato	0	1.51273	100	0.998128	sin dato	0	0.756364	1	-31.1377	-1.287	0	0	130.209	83.3	75.4287	0	0	0.0981971	0.867708	0.754287	-65.5962	-0.361158	0.18061	4.84	77	0.1374	0.618302
01-SIZ	Dílar	18068	Sierra Nevada NP	Dílar	ES.IGN.SIGLIM.34011818068	4	34011818068	ES6	ES61	ES614	7921.91										99.9489	99.945	76.9504	1.97489	66.2966	0.999489	1.00145	4.52649	0.987443	0.662966	63.5568	1.05023	2918.92	83.7095	322.955	81.69	91.8789	0.303548	0.295793	0.243556	0.850938	0.918789	-47.7475	-0.303758	0.136988	0.38	55	0.0510465	2.04186
01-SIZ	Dólar	18069	Sierra Nevada NP	Dólar	ES.IGN.SIGLIM.34011818069	4	34011818069	ES6	ES61	ES614	7852.43										99.9921	100	50.3271	1.98835	91.1261	0.999921	1.002	2.96042	0.994177	0.911261	37.3557	0.403537	2934.32	50.3249	2173.51	68.75	98.1188	0.30515	0.177827	1.63914	0.716146	0.981188	-23.6109	-0.226136	0.0799014	15.31	13	0.15674	0
02-BUFFER	Dúdar	18070																			100	99.8498	0	1.97658	3.45599	1	1.0005	0	0.988292	0.0345599	-39.533	-1.49422	1260.73	31.9881	14.5167	68.91	64.1946	0.131107	0.113032	0.0109477	0.717812	0.641946	-67.7031	-0.367934	0.176897	26.97	60	0.309598	0
01-SIZ	Dúrcal	18071	Sierra Nevada NP	Dúrcal	ES.IGN.SIGLIM.34011818071	4	34011818071	ES6	ES61	ES614	7657.66										99.8763	99.9506	78.6946	1.96525	96.5355	0.998763	1.00151	4.62909	0.982623	0.965355	71.5469	1.24744	2617.04	336.154	359.07	83.16	42.2258	0.272155	1.18782	0.270792	0.86625	0.422258	-39.6144	-0.277602	0.276606	11.84	61	0.284576	0.853728
01-SIZ	Ferreira	18074	Sierra Nevada NP	Ferreira	ES.IGN.SIGLIM.34011818074	4	34011818074	ES6	ES61	ES614	4354.57										100	99.9998	40.9891	1.98604	94.3614	1	1.002	2.41112	0.993018	0.943614	26.9951	0.14782	2839.19	51.1374	2477.78	83.33	100	0.295257	0.180698	1.86861	0.868021	1	-15.7483	-0.20085	0.0805815	39.23	23	0.327869	3.27869
02-BUFFER	Gójar	18084																			99.7492	99.9733	7.68142	1.79398	31.8331	0.997492	1.00174	0.451848	0.896992	0.318331	-26.672	-1.17678	927.049	13.5184	956.862	83.99	46.6333	0.096407	0.0477681	0.721616	0.874896	0.466333	-55.8596	-0.329846	0.487936	21.58	78	0.017838	0.535141
02-BUFFER	Gor	18085																			99.9963	99.9851	46.2025	1.98465	60.3121	0.999963	1.00185	2.71779	0.992323	0.603121	26.3011	0.13069	1180.55	59.4162	1693.49	69.33	96.7733	0.12277	0.209951	1.27714	0.722187	0.967733	-34.0043	-0.25956	0.0632036	6.3	4	0.536193	1.34048
02-BUFFER	Granada	18087																			99.6594	99.0127	5.51662	1.67069	91.5901	0.996594	0.992111	0.324507	0.835346	0.915901	-18.7108	-0.980286	1933.82	25.7436	77.6112	80.17	-2.67232	0.201104	0.0909667	0.0585303	0.835104	-0.0267232	-76.8204	-0.397255	0.232295	11.22	63	0.491472	0.945139
02-BUFFER	Guadix	18089																			99.9425	99.9594	0.018181	1.96692	66.0233	0.999425	1.0016	0.00106947	0.983462	0.660233	-27.0843	-1.18696	494.491	34.9453	3892.71	77.56	61.2165	0.0514237	0.123482	2.93568	0.807917	0.612165	-9.38669	-0.180391	0.228028	12.45	59	0.675568	1.22347
01-SIZ	Güejar Sierra	18094	Sierra Nevada NP	Güejar Sierra	ES.IGN.SIGLIM.34011818094	4	34011818094	ES6	ES61	ES614	23876.3										99.997	99.9569	52.2067	1.99553	42.6522	0.99997	1.00157	3.07098	0.997764	0.426522	29.9362	0.22041	1487.26	295.181	158.909	88.72	78.7782	0.154665	1.04304	0.119841	0.924167	0.787782	-39.41	-0.276945	0.102075	0.07	63	0.0347464	0.694927
01-SIZ	Huéneja	18097	Sierra Nevada NP	Huéneja	ES.IGN.SIGLIM.34011818097	4	34011818097	ES6	ES61	ES614	11664.8										99.9942	99.9856	21.8784	1.99502	87.3164	0.999942	1.00186	1.28696	0.99751	0.873164	3.18881	-0.439764	2127.46	55.2656	3092.14	67.35	100	0.221242	0.195285	2.33193	0.701562	1	-10.9996	-0.185578	0.092964	11.87	34	0.17301	0.865052
02-BUFFER	Huétor Vega	18101																			99.8231	100	0	1.43034	87.2555	0.998231	1.002	0	0.715172	0.872555	-28.2408	-1.2155	64.1445	2.14218	71.6896	82.24	99.8022	0.00667061	0.00756954	0.0540645	0.856667	0.998022	-61.5401	-0.348114	0.0599428	8	78	0.168011	0.756048
01-SIZ	Jerez del Marquesado	18108	Sierra Nevada NP	Jerez del Marquesado	ES.IGN.SIGLIM.34011818108	4	34011818108	ES6	ES61	ES614	8268.61										99.9884	99.9974	82.8628	1.99414	74.0759	0.999884	1.00198	4.87428	0.997072	0.740759	72.2795	1.26552	3851.19	78.8897	895.381	73.29	86.3198	0.400498	0.278762	0.675249	0.763437	0.863198	-40.3771	-0.280055	0.101851	40.21	25	0.0998004	0.998004
01-SIZ	Juviles	18112	Sierra Nevada NP	Juviles	ES.IGN.SIGLIM.34011818112	4	34011818112	ES6	ES61	ES614	1497.28										100	99.9961	80.0505	1.99418	100	1	1.00196	4.70885	0.997092	1	74.1582	1.31189	2806.21	1887.18	4168.48	67.8	100	0.291828	6.66847	3.14365	0.70625	1	136.204	0.287821	0.0920733	52.98	26	0.694444	0
02-BUFFER	La Calahorra	18114																			99.6714	100	4.31423	1.93753	98.258	0.996714	1.002	0.253778	0.968763	0.98258	-15.9232	-0.911483	261.477	7.57085	4061.48	86.3	77.1975	0.0271919	0.0267521	3.06296	0.898958	0.771975	-4.24327	-0.16385	0.125106	43.99	31	0.148588	1.48588
01-SIZ	Lanjarón	18116	Sierra Nevada NP	Lanjarón	ES.IGN.SIGLIM.34011818116	4	34011818116	ES6	ES61	ES614	6033.48										99.9532	98.3462	52.9253	1.9751	71.7964	0.999532	0.985433	3.11326	0.987552	0.717964	36.0747	0.371921	1831.36	653.16	8209.77	80.59	5.34733	0.190449	2.30799	6.19138	0.839479	0.0534733	91.6554	0.144555	0.225651	26.31	47	0.028547	1.14188
01-SIZ	Lanteira	18117	Sierra Nevada NP	Lanteira	ES.IGN.SIGLIM.34011818117	4	34011818117	ES6	ES61	ES614	5273.63										99.948	99.9997	73.048	1.97216	79.8205	0.99948	1.002	4.29694	0.986082	0.798205	61.6541	1.00327	3315.49	78.699	1139.85	62.84	88.0844	0.344789	0.278088	0.859619	0.654583	0.880844	-39.6415	-0.277689	0.0956867	28.27	31	0.178891	1.78891
01-SIZ	Lecrín	18119	Sierra Nevada NP	Lecrín	ES.IGN.SIGLIM.34011818119	4	34011818119	ES6	ES61	ES614	4045.76										99.9067	97.4689	59.1049	1.95202	94.9644	0.999067	0.976642	3.47676	0.976008	0.949644	47.5624	0.655457	3927.05	89.0166	287.454	73.81	100	0.408387	0.314546	0.216783	0.768854	1	-45.8286	-0.297587	0.211634	18.2	35	0.239349	0
02-BUFFER	Lobras	18121																			100	99.7521	0	1.99819	14.1826	1	0.99952	0	0.999096	0.141826	-37.1911	-1.43641	1219.06	68.9068	10511.7	96.87	100	0.126775	0.243487	7.92739	1.00906	1	106.134	0.191118	0.0872241	34.92	1	1.35135	6.75676
01-SIZ	Lugros	18123	Sierra Nevada NP	Lugros	ES.IGN.SIGLIM.34011818123	4	34011818123	ES6	ES61	ES614	6323.36										100	100	86.541	1.99822	94.2167	1	1.002	5.09065	0.99911	0.942167	80.6786	1.47283	2819.88	101.148	181.503	47.95	73.4682	0.293249	0.357414	0.13688	0.499479	0.734682	-59.5659	-0.341765	0.0660544	9.62	29	0.299401	0
02-BUFFER	Marchal	18128																			99.9978	99.9998	0.666764	1.98357	76.1939	0.999978	1.002	0.0392214	0.991784	0.761939	-24.1015	-1.11334	1383.6	35.4005	2575.69	61.72	100	0.143885	0.12509	1.94245	0.642917	1	-22.9132	-0.223892	0.21137	1.46	18	0.239808	0
01-SIZ	Monachil	18134	Sierra Nevada NP	Monachil	ES.IGN.SIGLIM.34011818134	4	34011818134	ES6	ES61	ES614	8884.97										99.9763	99.9591	82.1206	1.96497	64.281	0.999763	1.00159	4.83062	0.982487	0.64281	69.1455	1.18817	3875.7	100.597	197.581	81.01	41.513	0.403047	0.355465	0.149006	0.843854	0.41513	-56.67	-0.332452	0.261397	37.44	74	0.0388853	0.518471
02-BUFFER	Murtas	18141																			100	99.8124	0	1.9919	8.44248	1	1.00012	0	0.99595	0.0844248	-38.39	-1.46601	1847.79	60.4777	467.558	53.55	95.5799	0.192157	0.213702	0.352608	0.557812	0.955799	-54.5584	-0.325661	0.0832749	0	32	0.422833	4.22833
01-SIZ	Nigüelas	18143	Sierra Nevada NP	Nigüelas	ES.IGN.SIGLIM.34011818143	4	34011818143	ES6	ES61	ES614	3090.18										99.8224	97.8111	80.9564	1.96863	99.5258	0.998224	0.980071	4.76214	0.984315	0.995258	74.4002	1.31786	2750.64	943.023	153.415	68.39	99.8167	0.286048	3.33224	0.115697	0.712396	0.998167	8.89087	-0.121612	0.175672	14.8	30	0.083682	1.67364
02-BUFFER	Ogíjares	18145																			99.1062	sin dato	0	1.28246	100	0.991062	sin dato	0	0.641228	1	-34.1927	-1.36241	0	0	304.203	84.87	65.475	0	0	0.229414	0.884063	0.65475	-64.6355	-0.358069	0.188985	23.22	84	0.00722126	0.866551
02-BUFFER	Órgiva	18147																			99.9809	99.9308	0.185024	1.98839	74.4286	0.999809	1.00131	0.0108838	0.994196	0.744286	-24.9903	-1.13528	2107.63	109.243	5596.83	71.4	73.8809	0.21918	0.386018	4.22084	0.74375	0.738809	26.1719	-0.0660367	0.185284	12.46	52	0.394973	0.897666
02-BUFFER	Villa de Otura	18149																			99.6349	99.9972	0	1.75544	52.3442	0.996349	1.00198	0	0.877721	0.523442	-32.0103	-1.30854	152.202	7.93377	1181.31	81.41	-66.5298	0.015828	0.0280345	0.890885	0.848021	-0.665298	-77.6506	-0.399925	0.436002	28.87	75	0.014637	0.43911
02-BUFFER	Padul	18150																			99.8436	99.9364	15.7096	1.92098	97.3784	0.998436	1.00137	0.924092	0.960491	0.973784	-2.83663	-0.588482	1268.09	78.6702	714.439	64.29	86.0348	0.131872	0.277987	0.538793	0.669687	0.860348	-50.4262	-0.312372	0.277671	20.36	65	0.0118287	0.709723
01-SIZ	Pampaneira	18151	Sierra Nevada NP	Pampaneira	ES.IGN.SIGLIM.34011818151	4	34011818151	ES6	ES61	ES614	1745.79										100	99.9671	99.6846	1.99686	92.7289	1	1.00167	5.8638	0.998429	0.927289	95.8239	1.84664	6037.9	225.617	698.424	72.58	30.2905	0.627901	0.797233	0.526715	0.756042	0.302905	-39.7841	-0.278148	0.128481	0.83	61	0.308642	3.08642
02-BUFFER	La Peza	18154																			99.9856	99.9893	7.09037	1.99251	85.7064	0.999856	1.0019	0.417081	0.996256	0.857064	-14.5569	-0.877761	2728.97	64.6264	693.944	49.58	92.9861	0.283795	0.228362	0.523336	0.516458	0.929861	-50.3638	-0.312172	0.102064	8.71	46	0.164745	0.823723
02-BUFFER	Pinos Genil	18157																			99.9225	97.082	0.00870725	1.92758	18.3531	0.999225	0.972766	0.000512191	0.963791	0.183531	-37.6035	-1.44659	1935.64	42.0634	14.4148	88.85	88.3924	0.201294	0.148634	0.0108709	0.925521	0.883924	-56.5951	-0.332211	0.277966	29.8	79	0.0703235	0.703235
02-BUFFER	Polícar	18161																			100	100	0	1.97394	100	1	1.002	0	0.98697	1	-20.2205	-1.01755	573	19.9794	14.7477	66.36	94.5868	0.0595882	0.0705987	0.0111219	0.69125	0.945868	-64.4315	-0.357413	0.184467	24.37	33	0.438596	0
01-SIZ	Pórtugos	18163	Sierra Nevada NP	Pórtugos	ES.IGN.SIGLIM.34011818163	4	34011818163	ES6	ES61	ES614	2081.13										100	99.9995	87.382	1.99638	99.6787	1	1.002	5.14012	0.998192	0.996787	82.7419	1.52375	3594.82	225.375	2561.75	68.28	82.6726	0.373838	0.796379	1.93194	0.71125	0.826726	-7.19743	-0.173351	0.122004	18.55	42	0.248139	2.48139
02-BUFFER	Quéntar	18168																			99.9723	99.9721	45.2084	1.99094	73.327	0.999723	1.00172	2.65932	0.99547	0.73327	27.7901	0.167441	2818.34	69.0367	14.9747	86.8	81.054	0.293089	0.243946	0.0112932	0.904167	0.81054	-54.7393	-0.326243	0.111382	0	58	0.107759	1.07759
01-SIZ	Soportújar	18176	Sierra Nevada NP	Soportújar	ES.IGN.SIGLIM.34011818176	4	34011818176	ES6	ES61	ES614	1415.05										100	99.9939	70.1089	2	100	1	1.00194	4.12405	1	1	62.5199	1.02464	5423.54	375.562	5187.27	62.16	97.9575	0.564012	1.32707	3.91197	0.6475	0.979575	48.6026	0.00609925	0.125689	0	33	0.37594	0
02-BUFFER	Torvizcón	18179																			100	99.8492	0	1.99838	29.4664	1	1.00049	0	0.999191	0.294664	-34.113	-1.36044	2269.5	56.9385	926.785	36.66	100	0.236013	0.201196	0.698933	0.381875	1	-49.6397	-0.309843	0.107495	14.59	30	0.153846	3.07692
01-SIZ	Trevélez	18180	Sierra Nevada NP	Trevélez	ES.IGN.SIGLIM.34011818180	4	34011818180	ES6	ES61	ES614	9088.85										99.9825	99.9971	100	1.99631	99.9349	0.999825	1.00198	5.88235	0.998154	0.999349	97.6331	1.89129	1380.5	450.441	300.975	75.52	91.5219	0.143563	1.59167	0.22698	0.786667	0.915219	-26.7181	-0.236128	0.0847943	2.95	53	0.131926	2.63852
02-BUFFER	Ugíjar	18182																			99.9867	99.919	0	1.9867	30.9033	0.999867	1.00119	0	0.993349	0.309033	-33.9312	-1.35595	1131.4	44.3799	10757.7	68.25	41.7943	0.117659	0.156819	8.11293	0.710938	0.417943	90.3258	0.140279	0.179488	17.07	43	0.876145	1.99124
01-SIZ	Válor	18183	Sierra Nevada NP	Válor	ES.IGN.SIGLIM.34011818183	4	34011818183	ES6	ES61	ES614	5851.81										100	99.8626	80.3193	1.99322	84.239	1	1.00063	4.72466	0.99661	0.84239	71.2858	1.24099	1850.03	131.697	3969.14	51.06	83.3894	0.192391	0.46536	2.99332	0.531875	0.833894	0.33674	-0.149121	0.0999751	55.97	14	0.443787	1.47929
02-BUFFER	Vélez de Benaudalla	18184																			99.7392	99.9377	0	1.94519	52.2809	0.997392	1.00138	0	0.972593	0.522809	-30.1165	-1.2618	1753.11	81.5774	240.1	76.34	82.0649	0.182312	0.288259	0.181071	0.795208	0.820649	-54.65	-0.325956	0.172195	35.97	55	0.034662	1.03986
01-SIZ	La Zubia	18193	Sierra Nevada NP	La Zubia	ES.IGN.SIGLIM.34011818193	4	34011818193	ES6	ES61	ES614	2009.45										99.664	99.994	57.0787	1.71315	71.3278	0.99664	1.00194	3.35757	0.856576	0.713278	38.5202	0.43228	1292.61	26.4848	175.896	87.4	84.8335	0.134423	0.093586	0.132652	0.910417	0.848335	-57.6118	-0.335481	0.475075	9.2	79	0.10523	0.63138
01-SIZ	La Taha	18901	Sierra Nevada NP	La Taha	ES.IGN.SIGLIM.34011818901	4	34011818901	ES6	ES61	ES614	2556.72										100	99.9758	25.3206	1.99406	78.6745	1	1.00176	1.48945	0.997032	0.786745	5.49976	-0.382725	3907.4	244.73	13495	62.59	-140.202	0.406343	0.864769	10.1773	0.651979	-1.40202	113.966	0.216306	0.154567	33.76	43	0.459418	0
02-BUFFER	El Valle	18902																			100	99.7391	0	1.99477	54.2506	1	0.99939	0	0.997386	0.542506	-29.2144	-1.23953	2662.62	36.3295	436.944	44.59	37.2025	0.276895	0.128373	0.329521	0.464479	0.372025	-68.5742	-0.370735	0.18781	0.12	27	0.319829	0
01-SIZ	Nevada	18903	Sierra Nevada NP	Nevada	ES.IGN.SIGLIM.34011818903	4	34011818903	ES6	ES61	ES614	7725.23										100	99.9675	73.022	1.99542	83.3885	1	1.00168	4.29541	0.997711	0.833885	62.5737	1.02596	2406.37	108.349	5037.21	44.86	57.5492	0.250247	0.38286	3.7988	0.467292	0.575492	9.49391	-0.119672	0.110813	39.98	24	0.275482	0
01-SIZ	Alpujarra de la Sierra	18904	Sierra Nevada NP	Alpujarra de la Sierra	ES.IGN.SIGLIM.34011818904	4	34011818904	ES6	ES61	ES614	6847.9										100	99.9264	79.1138	1.99476	95.6911	1	1.00127	4.65375	0.997382	0.956911	72.1863	1.26322	2544.36	169.755	4106.12	34.43	68.9771	0.264597	0.599842	3.09662	0.358646	0.689771	0.189532	-0.149595	0.116373	14.51	34	0.195886	0
02-BUFFER	Las Gabias	18905																			99.6161	100	11.7644	1.75068	31.2011	0.996161	1.002	0.692026	0.875341	0.312011	-22.4491	-1.07256	340.424	3.47733	1144.87	88.31	81.006	0.0354018	0.0122874	0.863401	0.919896	0.81006	-47.1791	-0.30193	0.504309	9.19	79	0.0147572	0
02-BUFFER	Los Guajares	18906																			100	99.6732	0	1.99771	59.4515	1	0.99873	0	0.998856	0.594515	-28.158	-1.21346	3637.26	47.6825	465.586	45.27	95.0585	0.378251	0.16849	0.351121	0.471563	0.950585	-53.5998	-0.322579	0.102563	34.25	25	0.289296	0
02-BUFFER	Valle del Zalabí	18907																			99.9685	99.9957	54.4711	1.97994	82.4101	0.999685	1.00196	3.20418	0.989972	0.824101	40.398	0.478628	1493.33	42.3309	1955.85	82.56	47.3875	0.155296	0.149579	1.475	0.86	0.473875	-37.7249	-0.271526	0.132353	7.55	44	0	0
02-BUFFER	Villamena	18908																			99.6833	99.9011	0.0115691	1.94514	61.5525	0.996833	1.00101	0.000680534	0.972568	0.615525	-28.2676	-1.21617	2187	42.864	371.778	55.53	91.0569	0.227433	0.151463	0.280376	0.578438	0.910569	-57.0344	-0.333624	0.203352	14.02	43	0.206825	0
02-BUFFER	El Pinar	18910																			99.9513	99.6807	0.293601	1.95862	42.4123	0.999513	0.998804	0.0172706	0.979309	0.424123	-31.6196	-1.2989	3314.6	50.2607	4221.2	58.51	83.2483	0.344696	0.177599	3.18341	0.609479	0.832483	2.95332	-0.140706	0.146735	2.12	40	0	0
01-SIZ	Almonte	21005	Doñana NP	Almonte	ES.IGN.SIGLIM.34012121005	4	34012121005	ES6	ES61	ES615	86012										99.9809	99.8624	72.5124	1.98528	100	0.999809	1.00063	4.26543	0.992642	1	65.1702	1.09005	3102.37	76.4037	36797.7	74.82	-50.9901	0.322626	0.269978	0.122987	0.779375	-0.509901	-80.2987	-0.408441	0.15999	41.72	72	0.0945342	0.773462
02-BUFFER	Bollullos Par del Condado	21013																			99.8315	99.6301	0.0381683	1.90786	100	0.998315	0.998298	0.0022452	0.953932	1	-20.9442	-1.03541	976.961	5.5088	0	84.77	3.73726	0.101597	0.0194657	0	0.883021	0.0373726	-79.1709	-0.404814	0.441537	11.56	57	0.141894	0.922313
02-BUFFER	Bonares	21014																			99.8882	99.4918	26.4845	1.95512	94.7522	0.998882	0.996912	1.55791	0.977561	0.947522	9.57581	-0.282121	4421.14	80.4072	6.98624	68.12	100	0.45977	0.284124	0.00526866	0.709583	1	-50.8251	-0.313655	0.275006	0	64	0.33195	0.829876
02-BUFFER	Chucena	21030																			99.9704	68.8927	0.548698	1.94449	100	0.999704	0.690307	0.0322764	0.972246	1	-26.1093	-1.1629	592.861	1.30536	8.16475	97.85	83.3709	0.0616535	0.00461259	0.00615743	1.01927	0.833709	-61.4919	-0.347959	0.258807	24.19	53	0.0443262	1.32979
02-BUFFER	Escacena del Campo	21032																			99.9925	94.334	38.202	1.99437	98.8392	0.999925	0.945231	2.24718	0.997183	0.988392	23.5582	0.0629892	2696.35	138.545	14.8692	66.43	32.5243	0.280402	0.489559	0.0112136	0.691979	0.325243	-64.0321	-0.356128	0.11617	0.12	54	0.0443656	0.887311
01-SIZ	Hinojos	21040	Doñana NP	Hinojos	ES.IGN.SIGLIM.34012121040	4	34012121040	ES6	ES61	ES615	32033.7										99.9844	99.969	82.643	1.99371	100	0.999844	1.00169	4.86135	0.996854	1	77.1948	1.38684	2650.79	23.8018	100.122	75.51	83.7947	0.275664	0.0841055	0.075507	0.786563	0.837947	-58.8043	-0.339316	0.101875	2.34	64	0.0257003	1.02801
02-BUFFER	Lucena del Puerto	21046																			99.9837	99.4189	22.7986	1.98991	91.118	0.999837	0.996181	1.3411	0.994954	0.91118	4.86494	-0.398394	4570.42	89.9784	4647.43	77.79	71.5438	0.475294	0.317945	3.50485	0.810312	0.715438	16.4768	-0.0972155	0.191669	0	68	0.03125	0.9375
02-BUFFER	Manzanilla	21047																			99.9265	98.6956	0.104503	1.97074	100	0.999265	0.988934	0.00614721	0.985372	1	-20.4056	-1.02212	1878.03	121.607	10.369	55.71	23.9948	0.195303	0.429708	0.00781977	0.580313	0.239948	-70.9382	-0.378338	0.218486	0.7	55	0.0481696	1.44509
02-BUFFER	Moguer	21050																			99.8773	99.2109	36.7493	1.94498	95.7387	0.998773	0.994097	2.16172	0.97249	0.957387	21.6894	0.0168657	3391.57	33.3647	30544.5	76.18	71.4842	0.352701	0.117897	0.102087	0.793542	0.714842	-58.3786	-0.337947	0.294238	8.05	78	0.0976109	0.371851
02-BUFFER	La Palma del Condado	21054																			99.8545	99.3459	1.27775	1.92719	100	0.998545	0.99545	0.0751616	0.963596	1	-19.345	-0.995938	1751.89	9.54991	18.0533	78.14	20.3143	0.182185	0.0337453	0.0136149	0.813958	0.203143	-75.0671	-0.391616	0.364714	0.86	63	0.187091	0.935454
02-BUFFER	Palos de la Frontera	21055																			99.4346	99.728	26.9646	1.66529	100	0.994346	0.999279	1.58615	0.832646	1	8.24849	-0.314882	515.578	14.8629	101531	79.91	80.7248	0.0536167	0.052519	0.339342	0.832396	0.807248	-58.2976	-0.337686	0.381264	7.68	78	0.183739	0.826826
02-BUFFER	Paterna del Campo	21056																			99.995	99.6264	2.64405	1.99239	93.3805	0.99995	0.998261	0.155533	0.996196	0.933805	-18.3251	-0.970767	11689.8	118.699	13.4247	82.93	100	1.21566	0.419429	0.0101242	0.863854	1	-29.8186	-0.246099	0.149767	3.95	52	0.0285796	1.14318
02-BUFFER	Rociana del Condado	21061																			99.8083	99.8509	12.6037	1.94232	100	0.998083	1.00051	0.741396	0.971161	1	-5.777	-0.661056	7824.19	30.7831	0	51.63	92.2109	0.813664	0.108774	0	0.537813	0.922109	-52.3528	-0.318568	0.289014	2.59	59	0.0129634	0.648172
02-BUFFER	Villalba del Alcor	21074																			99.9787	99.9107	2.13636	1.9742	100	0.999787	1.00111	0.125668	0.987102	1	-17.7267	-0.955996	3982.89	35.7752	17.2747	76.03	100	0.414194	0.126414	0.0130277	0.791979	1	-53.0877	-0.320932	0.211708	15.2	58	0.0304971	1.52486
02-BUFFER	Benasque	22054																			99.9956	99.9995	78.5213	1.9929	100	0.999956	1.002	4.6189	0.996451	1	72.3461	1.26716	3690.25	835.487	70.0708	88.14	-51.5225	0.383761	2.95225	0.0528437	0.918125	-0.515225	-24.1649	-0.227917	0.0883102	41.82	78	0.0942951	2.35738
01-SIZ	Bielsa	22057	Ordesa y Monte Perdido NP	Bielsa	ES.IGN.SIGLIM.34022222057	4	34022222057	ES2	ES24	ES241	20259.9										100	100	84.5338	1.99856	100	1	1.002	4.97257	0.99928	1	79.4772	1.44317	6934.39	754.75	768.138	92.35	100	0.72113	2.66696	0.57929	0.961979	1	18.5872	-0.0904286	0.0445855	23.06	35	0.422833	2.11416
02-BUFFER	Biescas	22059																			99.9857	99.9971	52.6726	1.99248	96.8775	0.999857	1.00198	3.09839	0.996241	0.968775	41.3047	0.501007	9420.96	2233.5	83.9653	93.77	100	0.979717	7.89224	0.0633223	0.976771	1	118.241	0.230053	0.0823963	73.69	35	1.55405	2.02703
02-BUFFER	Boltaña	22066																			99.9818	99.9993	58.0011	1.99286	77.0552	0.999818	1.002	3.41183	0.996432	0.770552	43.6125	0.557968	8638.43	119.763	262.125	94.07	51.002	0.898339	0.423189	0.197681	0.979896	0.51002	-39.8175	-0.278255	0.078272	40.77	46	0.10627	2.1254
02-BUFFER	Bonansa	22067																			100	100	81.4397	1.9958	95.2818	1	1.002	4.79057	0.9979	0.952818	74.8658	1.32936	5957.97	206.497	222.237	79.49	100	0.619589	0.72967	0.167599	0.828021	1	-33.1024	-0.25666	0.0464095	40	48	1.26582	0
01-SIZ	Broto	22069	Ordesa y Monte Perdido NP	Broto	ES.IGN.SIGLIM.34022222069	4	34022222069	ES2	ES24	ES241	12812.1										99.9942	99.9942	18.0811	1.99373	95.6182	0.999942	1.00195	1.06359	0.996864	0.956182	0.370542	-0.509324	11714.3	1273.37	197.624	94.3	32.0029	1.21821	4.49953	0.149038	0.982292	0.320029	43.3818	-0.0106903	0.0582207	57.62	48	3.62319	3.62319
01-SIZ	Fanlo	22107	Ordesa y Monte Perdido NP	Fanlo	ES.IGN.SIGLIM.34022222107	4	34022222107	ES2	ES24	ES241	18719										100	99.9982	68.636	1.99904	100	1	1.00199	4.03741	0.999521	1	60.7784	0.981652	8812.53	1263.79	1323.75	93.07	100	0.916445	4.46568	0.998302	0.969479	1	66.9982	0.0652587	0.0224582	29.85	59	0	0
02-BUFFER	Fiscal	22109																			99.986	99.9998	13.5634	1.98842	95.0257	0.99986	1.002	0.797846	0.99421	0.950257	-5.11651	-0.644754	11682.5	283.852	193.143	98.04	72.9545	1.2149	1.00301	0.145658	1.02125	0.729545	-17.7127	-0.207167	0.0390034	55.65	40	0.309598	3.09598
02-BUFFER	Gistaín	22114																			100	99.9992	81.0028	1.99918	100	1	1.002	4.76487	0.999591	1	75.3292	1.34079	3528.44	1676.88	292.589	90.14	54.0438	0.366934	5.92538	0.220655	0.938958	0.540438	59.8472	0.0422615	0.0390454	2.9	18	0.704225	0
02-BUFFER	Hoz de Jaca	22122																			100	100	82.0966	1.99371	100	1	1.002	4.82921	0.996855	1	76.5614	1.37121	7284.58	1487.02	150.629	95.35	100	0.757548	5.25447	0.113596	0.993229	1	62.3769	0.050397	0.0679878	52.5	50	1.31579	0
02-BUFFER	Labuerda	22133																			100	100	0.0264481	1.99482	100	1	1.002	0.00155577	0.997408	1	-19.9807	-1.01163	14294.5	136.308	1683.42	91.18	-10.4274	1.48653	0.481653	1.26955	0.949792	-0.104274	-18.335	-0.209169	0.0829098	38.6	17	0.636943	0
02-BUFFER	Laspaúles	22143																			100	99.1476	43.6774	1.99573	82.8046	1	0.993463	2.56926	0.997864	0.828046	27.7727	0.167011	6414.15	862.552	235.118	95.04	87.0824	0.667028	3.04789	0.177314	0.99	0.870824	15.061	-0.101769	0.0554021	37.24	32	0.409836	0
02-BUFFER	Laspuña	22144																			100	99.9936	47.7026	1.99584	97.9411	1	1.00194	2.80603	0.997918	0.979411	35.706	0.362821	12492.1	306.836	394.313	88.35	69.8199	1.29909	1.08423	0.297371	0.920312	0.698199	-14.016	-0.195279	0.0720701	22.95	31	0.355872	0
02-BUFFER	Montanuy	22157																			100	99.0584	23.7849	1.99738	99.9836	1	0.992569	1.39911	0.99869	0.999836	7.80419	-0.325848	5019.01	2224.75	172.206	87.1	100	0.521944	7.8613	0.129869	0.907292	1	108.408	0.198431	0.0346957	14.29	26	1.36364	4.54545
02-BUFFER	Panticosa	22170																			99.9667	100	60.2762	1.99003	100	0.999667	1.002	3.54566	0.995015	1	50.8468	0.736523	2267.98	2203.93	198.217	83.13	-50.5303	0.235855	7.78775	0.149485	0.865937	-0.505303	70.6745	0.0770814	0.0813977	72.19	61	0.125786	1.25786
02-BUFFER	Plan	22182																			100	100	90.529	1.99733	100	1	1.002	5.32523	0.998666	1	86.5181	1.61695	8480.71	590.509	221.629	94.35	67.3265	0.881937	2.0866	0.167141	0.982812	0.673265	-4.16482	-0.163598	0.0520621	13.66	40	1.0453	3.48432
01-SIZ	Puértolas	22189	Ordesa y Monte Perdido NP	Puértolas	ES.IGN.SIGLIM.34022222189	4	34022222189	ES2	ES24	ES241	9994.58										100	99.9992	71.2484	1.99799	100	1	1.002	4.19108	0.998997	1	63.8415	1.05725	10261.5	1893.96	1106.57	88.51	-7.79723	1.06713	6.69244	0.834516	0.921979	-0.0779723	88.7619	0.13525	0.043067	33.09	41	0.47619	0
02-BUFFER	El Pueyo de Araguás	22190																			99.9991	100	47.2896	1.99413	95.2192	0.999991	1.002	2.78174	0.997065	0.952192	34.6598	0.336999	9789.07	741.48	640.511	100	100	1.018	2.62007	0.48304	1.04167	1	23.2555	-0.0754156	0.0442432	20.31	41	0	0
02-BUFFER	Sabiñánigo	22199																			99.9759	99.9952	18.9528	1.98591	88.256	0.999759	1.00196	1.11487	0.992956	0.88256	-0.15802	-0.522369	5412.72	353.287	67.7467	92.77	65.3846	0.562887	1.24837	0.051091	0.966354	0.653846	-30.3491	-0.247806	0.125111	12.56	52	0.237735	0.972552
02-BUFFER	Sallent de Gállego	22204																			99.9717	99.9985	31.7512	1.98156	100	0.999717	1.00199	1.86772	0.990782	1	17.2041	-0.0938409	2568.98	6037.4	133.478	86.56	100	0.267156	21.3336	0.100662	0.901667	1	372.061	1.04633	0.087839	64.69	72	0.34626	0.692521
02-BUFFER	San Juan de Plan	22207																			100	99.9998	99.74	1.99926	100	1	1.002	5.86706	0.99963	1	97.3738	1.88489	4185.45	761.479	100.701	96.97	-32.3145	0.435259	2.69074	0.0759438	1.0101	-0.323145	-22.222	-0.221669	0.0478927	3.57	35	0.704225	0
01-SIZ	Tella-Sin	22227	Ordesa y Monte Perdido NP	Tella-Sin	ES.IGN.SIGLIM.34022222227	4	34022222227	ES2	ES24	ES241	8958.64										100	99.9751	41.0085	1.99727	100	1	1.00175	2.41226	0.998637	1	28.2531	0.178869	9186.63	1167.77	707.553	97.89	8.96623	0.955348	4.12641	0.5336	1.01969	0.0896623	34.4941	-0.0392729	0.0483604	14.67	-2	9.09091	0
01-SIZ	Torla - Ordesa	22230	Ordesa y Monte Perdido NP	Torla - Ordesa		0					0										99.9873	99.9984	90.6186	1.99691	100	0.999873	1.00199	5.33051	0.998453	1	86.6164	1.61938	6341.78	2884.2	530.739	89.54	100	0.659503	10.1915	0.400256	0.932708	1	163.68	0.376181	0.0378764	49.07	45	0.334448	0
02-BUFFER	Yebra de Basa	22252																			100	99.9924	39.0358	1.97865	88.6131	1	1.00193	2.29622	0.989325	0.886131	23.4721	0.0608652	7754.31	420.778	54.5359	94.12	100	0.806397	1.48685	0.0411282	0.980417	1	-13.7042	-0.194276	0.0362918	4.48	46	0	0
02-BUFFER	Yésero	22253																			100	100	85.4765	1.99846	100	1	1.002	5.02803	0.999229	1	80.5853	1.47052	12881.1	2194.03	157.84	91.67	100	1.33955	7.75275	0.119035	0.954896	1	123.324	0.246401	0.0422336	52.17	33	1.78571	0
02-BUFFER	Aínsa-Sobrarbe	22907																			99.9922	99.9959	25.3601	1.99298	74.7413	0.999922	1.00196	1.49177	0.996488	0.747413	4.75108	-0.401204	7008.44	103.905	760.098	94.6	57.485	0.728831	0.367155	0.573226	0.985417	0.57485	-35.4104	-0.264082	0.0797605	32.21	41	0.986842	2.34962
01-SIZ	Oseja de Sajambre	24106	Picos de Europa NP	Oseja de Sajambre	ES.IGN.SIGLIM.34072424106	4	34072424106	ES4	ES41	ES413	7330.47										100	99.9323	99.9999	1.99387	99.2457	1	1.00133	5.88235	0.996934	0.992457	97.4613	1.88705	20074.3	1374.38	1642.12	84	99.0238	2.08759	4.85646	1.2384	0.875	0.990238	100.954	0.174458	0.0593105	41.29	-14	1.5873	0
01-SIZ	Posada de Valdeón	24116	Picos de Europa NP	Posada de Valdeón	ES.IGN.SIGLIM.34072424116	4	34072424116	ES4	ES41	ES413	16447.1										100	99.8895	100	1.99643	100	1	1.0009	5.88235	0.998215	1	97.6293	1.8912	9969	2438.85	1668.09	89.33	100	1.03671	8.61785	1.25798	0.930521	1	156.861	0.354254	0.0384201	25.78	-8	0.663717	2.21239
01-SIZ	Amieva	33003	Picos de Europa NP	Amieva	ES.IGN.SIGLIM.34033333003	4	34033333003	ES1	ES12	ES120	11389.7										100	98.6135	99.8841	2	97.3872	1	0.988112	5.87553	1	0.973872	96.7503	1.86951	17410.7	1800.92	831.921	91.56	-105.768	1.81059	6.36367	0.627392	0.95375	-1.05768	73.9544	0.0876295	0.0755713	18.47	4	0.143062	0
01-SIZ	Cabrales	33008	Picos de Europa NP	Cabrales	ES.IGN.SIGLIM.34033333008	4	34033333008	ES1	ES12	ES120	23823.8										99.9928	99.3909	46.6876	1.99679	99.2013	0.999928	0.995901	2.74633	0.998394	0.992013	34.6513	0.336788	8553.24	4653.3	909.488	81.08	42.5744	0.88948	16.4427	0.685889	0.844583	0.425744	285.769	0.768814	0.0868024	14.8	32	0.0996016	0
01-SIZ	Cangas de Onís	33012	Picos de Europa NP	Cangas de Onís	ES.IGN.SIGLIM.34033333012	4	34033333012	ES1	ES12	ES120	21273.6										99.9339	98.0647	36.1118	1.98496	97.9333	0.999339	0.982612	2.12422	0.992478	0.979333	21.5597	0.013664	15509.9	3684.43	911.551	85.44	93.9396	1.61292	13.0192	0.687444	0.89	0.939396	242.979	0.631205	0.163123	22.52	41	0.315856	0.78964
02-BUFFER	Alins	25017																			100	99.9773	94.3171	1.99932	100	1	1.00178	5.54806	0.999658	1	90.99	1.72733	5834.79	262.412	167.012	94.5	71.4345	0.606779	0.927251	0.125952	0.984375	0.714345	-32.826	-0.255771	0.036135	29.32	25	1.3986	3.4965
01-SIZ	Alt Àneu	25024	Aigüestortes i Estany de Sant Maurici NP	Alt Àneu	ES.IGN.SIGLIM.34092525024	4	34092525024	ES5	ES51	ES513	21816.9										100	99.9661	79.6852	1.9988	100	1	1.00166	4.68737	0.999402	1	73.7687	1.30228	4023.45	1556.04	286.233	95.65	100	0.418412	5.49839	0.215862	0.996354	1	62.5803	0.0510509	0.039967	17.73	54	0.246914	0
01-SIZ	Naut Aran	25025	Aigüestortes i Estany de Sant Maurici NP	Naut Aran	ES.IGN.SIGLIM.34092525025	4	34092525025	ES5	ES51	ES513	25556.4										99.9693	99.8927	58.2678	1.98919	100	0.999693	1.00093	3.42752	0.994597	1	48.4547	0.677482	3232.83	2393.92	319.236	93.4	100	0.336193	8.45908	0.240751	0.972917	1	120.179	0.236285	0.074918	80.67	76	0.112296	0
02-BUFFER	Arres	25031																			100	100	55.4015	1.99836	100	1	1.002	3.25891	0.999181	1	45.2019	0.597197	12958.6	1834.99	212.985	100	100	1.34761	6.48407	0.160622	1.04167	1	100.679	0.173575	0.0658978	8	47	1.69492	0
02-BUFFER	Baix Pallars	25039																			100	99.7762	56.8347	1.99818	91.7474	1	0.999762	3.34322	0.999092	0.917474	45.1909	0.596924	7764.5	601.532	301.949	88.39	-2.05873	0.807456	2.12556	0.227714	0.920729	-0.0205873	-18.7826	-0.210608	0.0473157	1.13	34	0.879765	0
01-SIZ	La Vall de Boí	25043	Aigüestortes i Estany de Sant Maurici NP	La Vall de Boí	ES.IGN.SIGLIM.34092525043	4	34092525043	ES5	ES51	ES513	22084.3										99.8875	99.9935	70.1307	1.98378	100	0.998875	1.00194	4.12534	0.991888	1	62.3607	1.02071	3623.33	1848	1131.66	95.37	57.7169	0.376802	6.53002	0.853439	0.993438	0.577169	86.6173	0.128353	0.062176	45.88	65	0.492611	0
02-BUFFER	Es Bòrdes	25057																			100	100	76.0886	1.99621	100	1	1.002	4.4758	0.998105	1	69.5182	1.19737	11069.9	3875.86	155.32	94.44	100	1.1512	13.6956	0.117134	0.98375	1	238.954	0.618261	0.093925	39.06	67	0.396825	3.96825
02-BUFFER	Bossòst	25059																			99.9663	99.0924	58.9442	1.98413	100	0.999663	0.99291	3.46731	0.992064	1	49.0389	0.6919	13261.3	1453.43	234.325	94.62	100	1.37909	5.13581	0.176715	0.985625	1	73.5449	0.0863125	0.182445	3.14	65	0.0892857	2.67857
02-BUFFER	Canejan	25063																			100	99.8489	89.8351	1.99856	100	1	1.00049	5.28442	0.999282	1	85.6837	1.59636	8381.22	3098.56	120.84	89.13	100	0.871591	10.949	0.0911313	0.928437	1	176.803	0.418385	0.0426132	10.68	31	1.13636	0
01-SIZ	Espot	25082	Aigüestortes i Estany de Sant Maurici NP	Espot	ES.IGN.SIGLIM.34092525082	4	34092525082	ES5	ES51	ES513	9755.8										100	99.9916	77.1397	1.99797	100	1	1.00192	4.53763	0.998983	1	70.7707	1.22828	4587.93	566.193	1236.75	96.15	100	0.477114	2.00068	0.932696	1.00156	1	8.24111	-0.123701	0.0536777	37.7	62	0.273973	0
01-SIZ	Esterri d'Àneu	25086	Aigüestortes i Estany de Sant Maurici NP	Esterri d'Àneu	ES.IGN.SIGLIM.34092525086	4	34092525086	ES5	ES51	ES513	857.051										99.9142	99.9975	23.4188	1.95444	100	0.999142	1.00198	1.37758	0.97722	1	7.11839	-0.342774	5001.87	2836.67	326.568	95.75	99.9953	0.520161	10.0236	0.246281	0.997396	0.999953	155.747	0.350672	0.282994	61.99	56	0.130039	3.90117
02-BUFFER	Esterri de Cardós	25087																			100	100	78.2909	1.99719	100	1	1.002	4.60535	0.998597	1	72.119	1.26156	7008.38	812.999	319.838	93.55	42.7812	0.728825	2.87279	0.241205	0.974479	0.427812	4.90221	-0.134439	0.059792	50	37	0	0
02-BUFFER	Farrera	25089																			100	99.994	49.532	2	100	1	1.00194	2.91364	1	1	38.3118	0.427135	8544.9	1314.51	373.758	77.78	100	0.888612	4.64492	0.281869	0.810208	1	52.5122	0.0186723	0.041565	0	60	0	0
02-BUFFER	Les	25121																			99.9533	99.3278	87.6213	1.9804	100	0.999533	0.995268	5.15419	0.990201	1	82.7839	1.52479	12151.9	1926.3	234.981	95.61	100	1.26371	6.8067	0.17721	0.995938	1	104.871	0.187056	0.185854	0	61	0.104712	3.14136
02-BUFFER	Lladorre	25123																			100	99.9583	86.9797	2	100	1	1.00159	5.11645	1	1	82.3607	1.51434	3449.43	504.805	294.589	89.8	100	0.358717	1.78376	0.222164	0.935417	1	-13.9988	-0.195224	0.036174	11.01	49	0.888889	0
02-BUFFER	Llavorsí	25126																			100	99.9937	63.5841	1.99828	100	1	1.00194	3.74024	0.999138	1	54.8264	0.834747	11125.4	1084.32	294.435	91.07	30.8666	1.15696	3.83152	0.222047	0.948646	0.308666	29.3569	-0.0557937	0.0646197	43.3	34	0.278552	5.57103
02-BUFFER	Montferrer i Castellbò	25140																			99.9522	99.9997	17.5403	1.98475	96.0245	0.999522	1.002	1.03178	0.992377	0.960245	-0.281466	-0.525416	9479.19	451.746	169.656	92.26	100	0.985773	1.59628	0.127946	0.961042	1	-6.57924	-0.171363	0.0678139	35.04	55	0.0915751	2.74725
02-BUFFER	Conca de Dalt	25161																			99.9997	99.9754	49.5562	1.99788	56.9789	0.999997	1.00176	2.91507	0.998939	0.569789	29.7111	0.214854	6255.54	175.763	174.814	96.89	100	0.650534	0.621069	0.131836	1.00927	1	-31.7458	-0.252297	0.0456715	0	21	0	0
02-BUFFER	La Pobla de Segur	25171																			99.9701	99.9851	53.733	1.96373	93.6343	0.999701	1.00185	3.16076	0.981865	0.936343	41.6106	0.508555	5391.11	267.58	355.839	94.86	65.3773	0.560639	0.945513	0.268355	0.988125	0.653773	-31.6719	-0.252059	0.272678	26.47	30	0.678196	1.01729
02-BUFFER	El Pont de Suert	25173																			99.9913	99.8501	15.7757	1.99384	94.3785	0.999913	1.0005	0.927984	0.996919	0.943785	-2.61795	-0.583085	5947.57	1119.3	428.453	91.63	-50.3224	0.618508	3.95511	0.323117	0.954479	-0.503224	6.95986	-0.127822	0.117891	27.11	50	0.971302	1.3245
02-BUFFER	Rialp	25183																			100	99.9944	49.2739	1.995	100	1	1.00195	2.89847	0.997498	1	37.9583	0.41841	8688.74	1043.6	511.16	94.19	59.6283	0.903571	3.68763	0.385491	0.981146	0.596283	31.0825	-0.0502444	0.0924168	48.43	61	0.15015	3.003
02-BUFFER	Sarroca de Bellera	25201																			99.9999	99.9985	0.15564	1.99784	100	0.999999	1.00199	0.00915532	0.998922	1	-19.7987	-1.00714	4703.18	2512.51	619.764	94	88.8333	0.489099	8.87812	0.467394	0.979167	0.888333	134.042	0.280869	0.0343601	46.77	7	0	0
02-BUFFER	Senterada	25202																			100	99.9972	0.0387413	1.99853	96.2908	1	1.00198	0.0022789	0.999265	0.962908	-20.6714	-1.02868	5798.59	961.968	463.93	93.02	97.0412	0.603015	3.39918	0.349872	0.968958	0.970412	25.8287	-0.0671402	0.0560992	62.5	37	0.735294	0
02-BUFFER	Soriguera	25208																			100	99.8344	79.0465	2	93.9996	1	1.00034	4.6498	1	0.939996	71.8027	1.25375	9367.02	531.919	204.264	95.71	32.4643	0.974108	1.87957	0.154045	0.996979	0.324643	-13.413	-0.19334	0.0524904	47.74	41	0	0
01-SIZ	Sort	25209	Aigüestortes i Estany de Sant Maurici NP	Sort	ES.IGN.SIGLIM.34092525209	4	34092525209	ES5	ES51	ES513	10533.8										99.9821	99.9933	54.0171	1.99275	100	0.999821	1.00194	3.17748	0.996374	1	43.5122	0.55549	2886.01	5723.63	646.191	94.12	81.3354	0.300126	20.2248	0.487323	0.980417	0.813354	356.121	0.995064	0.133496	45.39	55	0.93985	2.34962
02-BUFFER	Tírvia	25221																			100	99.9999	7.23925	2	100	1	1.002	0.425838	1	1	-11.4432	-0.800908	10379.7	61.073	940.424	87.23	90.6454	1.07942	0.215806	0.709219	0.908646	0.906454	-23.6091	-0.22613	0.119105	56.06	49	0.70922	7.0922
01-SIZ	La Torre de Cabdella	25227	Aigüestortes i Estany de Sant Maurici NP	La Torre de Cabdella	ES.IGN.SIGLIM.34092525227	4	34092525227	ES5	ES51	ES513	16583.4										100	99.9512	39.2292	1.99646	99.9063	1	1.00151	2.3076	0.998232	0.999063	26.1282	0.126423	3265.43	2180.03	648.236	96.17	100	0.339583	7.70328	0.488866	1.00177	1	110.67	0.205705	0.0609534	0	34	0.265252	1.32626
01-SIZ	Vielha e Mijaran	25243	Aigüestortes i Estany de Sant Maurici NP	Vielha e Mijaran	ES.IGN.SIGLIM.34092525243	4	34092525243	ES5	ES51	ES513	21140.8										99.9864	99.9938	45.2364	1.98915	100	0.999864	1.00194	2.66096	0.994575	1	33.1469	0.299656	6674.24	3281.68	394.293	95.54	98.1141	0.694077	11.5961	0.297355	0.995208	0.981141	191.277	0.464933	0.147931	50.35	78	2.17707	0.725689
01-SIZ	Vilaller	25245	Aigüestortes i Estany de Sant Maurici NP	Vilaller	ES.IGN.SIGLIM.34092525245	4	34092525245	ES5	ES51	ES513	5860.02										99.9739	99.9994	53.8125	1.99301	100	0.999739	1.002	3.16544	0.996505	1	43.2736	0.549603	8872.57	219.232	405.482	91.6	-99.9805	0.922689	0.774671	0.305793	0.954167	-0.999805	-60.8497	-0.345894	0.094086	39.47	54	0.365631	1.82815
02-BUFFER	Vilamòs	25247																			100	99.9995	69.153	1.99372	100	1	1.002	4.06783	0.996858	1	61.3337	0.995357	11170.7	3081.87	165.793	100	100	1.16168	10.89	0.125033	1.04167	1	184.368	0.442713	0.0983082	37.78	66	0.662252	0
02-BUFFER	Vall de Cardós	25901																			100	99.9942	51.3248	1.99666	100	1	1.00195	3.0191	0.998332	1	40.3876	0.478371	7781.29	409.408	557.067	94.7	13.3378	0.809203	1.44667	0.420111	0.986458	0.133378	-24.0836	-0.227656	0.0760479	59	40	0.277778	0
01-SIZ	La Guingueta d'Àneu	25903	Aigüestortes i Estany de Sant Maurici NP	La Guingueta d'Àneu	ES.IGN.SIGLIM.34092525903	4	34092525903	ES5	ES51	ES513	10869.3										100	99.9619	41.8464	1.99829	100	1	1.00162	2.46155	0.999144	1	29.2464	0.203385	5912.15	1352.39	368.963	92.25	87.6897	0.614824	4.77875	0.278253	0.960938	0.876897	50.1933	0.011215	0.050394	8.33	47	0.321543	0
01-SIZ	Alameda del Valle	28003	Sierra de Guadarrama NP	Alameda del Valle	ES.IGN.SIGLIM.34132828003	4	34132828003	ES3	ES30	ES300	2571.9										99.9434	99.9996	78.0561	1.98737	84.192	0.999434	1.002	4.59154	0.993684	0.84192	68.5715	1.174	6057.03	893.427	654.618	87.3	100	0.629891	3.15698	0.493679	0.909375	1	23.7986	-0.0736691	0.0871663	55.92	11	0.502513	0
02-BUFFER	Alpedrete	28010																			99.4211	99.7565	32.5405	1.52702	100	0.994211	0.999564	1.91415	0.763509	1	13.4286	-0.187026	2852.62	376.811	2250.01	90.37	99.9697	0.296653	1.33149	1.69684	0.941354	0.999697	5.32061	-0.133093	0.430015	46.05	81	0.00702247	1.33427
01-SIZ	Becerril de la Sierra	28018	Sierra de Guadarrama NP	Becerril de la Sierra	ES.IGN.SIGLIM.34132828018	4	34132828018	ES3	ES30	ES300	3052.92										99.8585	99.9832	61.1785	1.83294	77.7532	0.998585	1.00184	3.59873	0.916472	0.777532	45.8632	0.613517	3124.8	949.617	1008.65	86.98	100	0.324958	3.35554	0.760671	0.906042	1	26.9442	-0.0635531	0.358748	73.33	75	0.0183251	0.549753
01-SIZ	El Boalo	28023	Sierra de Guadarrama NP	El Boalo	ES.IGN.SIGLIM.34132828023	4	34132828023	ES3	ES30	ES300	3945.02										99.7959	99.9733	76.6724	1.82121	80.429	0.997959	1.00174	4.51014	0.910603	0.80429	64.4946	1.07337	3774.14	1720.05	886.54	88.08	70.1565	0.392485	6.07791	0.668582	0.9175	0.701565	75.1609	0.0915095	0.362668	58.27	78	0.0407719	0.679532
02-BUFFER	Braojos	28024																			100	99.992	41.2266	1.99723	100	1	1.00192	2.42509	0.998613	1	28.5126	0.185274	11164	113.569	333.98	94.2	99.9303	1.16098	0.401305	0.251871	0.98125	0.999303	-24.1058	-0.227727	0.0798527	75.73	53	0.480769	0
02-BUFFER	Buitrago del Lozoya	28027																			99.8947	99.9926	32.0937	1.90213	100	0.998947	1.00193	1.88787	0.951066	1	16.7962	-0.103909	7814.16	1484.13	555.414	90.03	84.9909	0.812621	5.24427	0.418864	0.937813	0.849909	65.2696	0.0596995	0.246079	32.21	65	1.07875	4.31499
02-BUFFER	Bustarviejo	28028																			99.8848	99.6383	70.4482	1.95931	90.6615	0.998848	0.99838	4.14401	0.979655	0.906615	60.5502	0.97602	6537.46	237.213	2149.6	87.75	63.2457	0.679852	0.838208	1.62112	0.914062	0.632457	-6.28606	-0.17042	0.178781	67.15	55	0.041684	0.833681
02-BUFFER	La Cabrera	28030																			99.81	99.9854	0	1.83603	82.1709	0.9981	1.00186	0	0.918015	0.821709	-25.2064	-1.14061	3611.03	392.774	2860.7	86.47	99.9371	0.375523	1.38789	2.15739	0.900729	0.999371	16.4182	-0.0974042	0.29683	61.86	70	0.77821	1.94553
01-SIZ	Canencia	28034	Sierra de Guadarrama NP	Canencia	ES.IGN.SIGLIM.34132828034	4	34132828034	ES3	ES30	ES300	5415.48										99.9725	99.9516	51.4053	1.99255	99.0432	0.999725	1.00152	3.02384	0.996277	0.990432	40.2358	0.474625	9747.98	574.419	1709.73	91.1	100	1.01372	2.02975	1.28939	0.948958	1	25.6365	-0.0677585	0.0836082	66.78	-13	0.223214	2.23214
01-SIZ	Cercedilla	28038	Sierra de Guadarrama NP	Cercedilla	ES.IGN.SIGLIM.34132828038	4	34132828038	ES3	ES30	ES300	3573.56										99.8789	99.9869	82.3824	1.88301	93.1191	0.998789	1.00187	4.84602	0.941505	0.931191	74.3876	1.31755	13426.5	345.798	433.598	90.57	100	1.39627	1.2219	0.326997	0.943437	1	-2.22795	-0.157369	0.378494	53.04	65	1.75106	1.02145
02-BUFFER	Colmenar Viejo	28045																			99.8784	99.9262	30.7061	1.90183	99.8088	0.998784	1.00126	1.80624	0.950913	0.998088	15.1058	-0.14563	1920.42	2428.37	2350.58	89.68	99.1151	0.199711	8.58082	1.77269	0.934167	0.991151	149.571	0.330808	0.446063	13.79	76	0.0822808	0.678817
02-BUFFER	Collado Mediano	28046																			99.7956	99.8488	8.8711	1.81559	100	0.997956	1.00049	0.521829	0.907796	1	-11.4386	-0.800794	5369.79	902.158	1907.09	90.24	67.1441	0.558422	3.18784	1.43823	0.94	0.671441	35.9185	-0.0346921	0.442411	40.43	78	0.0150015	0.750075
02-BUFFER	Collado Villalba	28047																			99.6445	99.8573	41.7301	1.54583	100	0.996445	1.00057	2.45471	0.772914	1	24.4929	0.0860589	2176.96	329.242	1242.15	88.16	2.73218	0.226389	1.1634	0.936764	0.918333	0.0273218	-34.5559	-0.261334	0.134136	23.22	82	0.257433	0.643583
02-BUFFER	El Escorial	28054																			99.6847	99.7485	0.416193	1.84849	99.4835	0.996847	0.999484	0.0244819	0.924244	0.994835	-21.2022	-1.04178	4291.82	147.677	1509.96	89.44	100	0.446321	0.521826	1.13873	0.931667	1	-19.229	-0.212044	0.401072	46.3	73	0.0128518	0.385555
02-BUFFER	Galapagar	28061																			99.6061	99.4883	50.3731	1.74558	98.5257	0.996061	0.996876	2.96313	0.87279	0.985257	36.2822	0.377041	3114.02	416.143	701.046	91.9	32.7055	0.323837	1.47047	0.528692	0.957292	0.327055	-27.8531	-0.239778	0.521555	25.41	84	0.0607847	0.547063
02-BUFFER	Garganta de los Montes	28062																			99.9709	99.8462	7.19761	1.97602	99.4431	0.999709	1.00046	0.423389	0.988012	0.994431	-11.8799	-0.811687	6325.83	1406.91	1283.48	90.84	8.11616	0.657844	4.97141	0.967932	0.94625	0.0811616	52.492	0.0186074	0.0885184	73.45	35	0.60423	0
02-BUFFER	Gargantilla del Lozoya y Pinilla de Buitrago	28063																			99.85	99.928	13.2259	1.95857	100	0.9985	1.00128	0.777992	0.979287	1	-4.85878	-0.638393	5165.26	1344.21	497.818	84.25	100	0.537153	4.74988	0.375429	0.877604	1	50.8012	0.0131701	0.110443	81.84	42	0.634921	0
02-BUFFER	Gascones	28064																			99.9462	99.9979	49.6346	1.98089	100	0.999462	1.00198	2.91968	0.990445	1	38.2314	0.425152	11196.5	115.107	425.214	92.31	100	1.16437	0.406738	0.320674	0.961562	1	-22.9332	-0.223956	0.0870784	66.43	60	0.568182	0
02-BUFFER	Guadalix de la Sierra	28067																			99.9348	99.9399	8.47703	1.94184	100	0.999348	1.0014	0.498649	0.970919	1	-10.5936	-0.779939	2930.84	1311.71	4623.23	90.86	97.4631	0.304788	4.635	3.4866	0.946458	0.974631	106.95	0.193741	0.282023	54.67	70	0.0165317	0.991899
01-SIZ	Guadarrama	28068	Sierra de Guadarrama NP	Guadarrama	ES.IGN.SIGLIM.34132828068	4	34132828068	ES3	ES30	ES300	5715.88										99.7926	99.7843	51.4863	1.80595	100	0.997926	0.999842	3.0286	0.902974	1	38.5869	0.433927	9760.69	297.844	1715.48	88.24	92.1041	1.01505	1.05245	1.29373	0.919167	0.921041	4.02868	-0.137248	0.433401	43.04	73	1.40845	0.832266
02-BUFFER	Hoyo de Manzanares	28072																			99.9235	99.9007	100	1.83702	100	0.999235	1.00101	5.88235	0.91851	1	96.0221	1.85153	2646.32	309.202	138.354	91.8	98.5994	0.275199	1.09258	0.10434	0.95625	0.985994	-31.7127	-0.25219	0.358601	45.32	78	0.0124502	0.498008
01-SIZ	Lozoya	28076	Sierra de Guadarrama NP	Lozoya	ES.IGN.SIGLIM.34132828076	4	34132828076	ES3	ES30	ES300	5768.62										99.9683	99.9956	77.5718	1.9842	99.2622	0.999683	1.00196	4.56305	0.992099	0.992622	70.9882	1.23365	9319.09	434.012	493.933	87.37	100	0.969123	1.53361	0.372499	0.910104	1	-4.29324	-0.164011	0.0920346	73.84	49	0.178891	3.57782
01-SIZ	Manzanares el Real	28082	Sierra de Guadarrama NP	Manzanares el Real	ES.IGN.SIGLIM.34132828082	4	34132828082	ES3	ES30	ES300	12683.2										99.9757	99.9756	98.8819	1.96011	68.4799	0.999757	1.00176	5.81658	0.980054	0.684799	89.659	1.69448	6212.39	600.898	165.915	89.68	87.3976	0.646047	2.12331	0.125124	0.934167	0.873976	-5.94744	-0.169331	0.226557	58.43	76	0.235294	0.705882
01-SIZ	Miraflores de la Sierra	28085	Sierra de Guadarrama NP	Miraflores de la Sierra	ES.IGN.SIGLIM.34132828085	4	34132828085	ES3	ES30	ES300	5641.4										99.8175	99.8765	53.4987	1.88705	86.8797	0.998175	1.00077	3.14698	0.943526	0.868797	39.165	0.448193	10212.4	597.852	2012.04	89.65	48.0999	1.06202	2.11255	1.51738	0.933854	0.480999	22.1361	-0.0790155	0.287532	65.08	65	0.017191	0.85955
01-SIZ	Los Molinos	28087	Sierra de Guadarrama NP	Los Molinos	ES.IGN.SIGLIM.34132828087	4	34132828087	ES3	ES30	ES300	1916.66										99.667	99.7227	47.0811	1.79343	100	0.99667	0.999225	2.76948	0.896717	1	33.2418	0.301999	5966.57	648.92	1173.28	87.92	79.7004	0.620484	2.29301	0.884828	0.915833	0.797004	10.2231	-0.117327	0.405538	52.18	65	0.023015	0.920598
02-BUFFER	Moralzarzal	28090																			99.7923	99.9561	74.9388	1.87252	100	0.997923	1.00156	4.40817	0.936261	1	66.8783	1.13221	4124.71	900.343	703.532	89.61	78.326	0.428942	3.18142	0.530567	0.933438	0.78326	17.1526	-0.0950423	0.435489	49.96	80	0.00800256	0.880282
01-SIZ	Navacerrada	28093	Sierra de Guadarrama NP	Navacerrada	ES.IGN.SIGLIM.34132828093	4	34132828093	ES3	ES30	ES300	2751.34										99.8079	99.9925	85.1888	1.91174	86.8593	0.998079	1.00193	5.01111	0.955871	0.868593	76.7116	1.37491	8867.23	306.539	252.492	91.34	100	0.922133	1.08318	0.190416	0.951458	1	-17.0563	-0.205056	0.280555	62.25	72	0.0345543	0.691085
02-BUFFER	Navalafuente	28094																			99.4993	98.84	0.000320328	1.87492	100	0.994993	0.990381	1.88428e-05	0.937459	1	-21.543	-1.05019	3775.84	216.411	4135.59	86.94	100	0.392662	0.764704	3.11885	0.905625	1	23.6368	-0.0741894	0.277768	78.77	62	0.0746269	0.746269
01-SIZ	Navarredonda y San Mamés	28097	Sierra de Guadarrama NP	Navarredonda y San Mamés	ES.IGN.SIGLIM.34132828097	4	34132828097	ES3	ES30	ES300	2848.05										100	99.997	28.7309	1.99726	100	1	1.00197	1.69005	0.998631	1	13.8132	-0.177535	10285.5	827.973	327.078	95.56	100	1.06962	2.9257	0.246665	0.995417	1	24.748	-0.0706157	0.0622728	77.12	9	1.52672	0
02-BUFFER	Pedrezuela	28108																			99.8478	99.6523	12.3027	1.87544	100	0.998478	0.99852	0.723688	0.937721	1	-6.83186	-0.687092	4406.84	1848.13	4375.93	87.59	89.0347	0.458282	6.53049	3.3001	0.912396	0.890347	141.832	0.305921	0.359673	42.81	73	0.0178158	1.2471
01-SIZ	Pinilla del Valle	28112	Sierra de Guadarrama NP	Pinilla del Valle	ES.IGN.SIGLIM.34132828112	4	34132828112	ES3	ES30	ES300	2542.09										99.9424	99.9878	75.3238	1.98547	88.6013	0.999424	1.00188	4.43081	0.992737	0.886013	66.2174	1.1159	5633.3	709.137	527.577	85.94	100	0.585825	2.50578	0.397871	0.895208	1	7.69374	-0.125461	0.0804861	55.29	34	0.540541	0
01-SIZ	Rascafría	28120	Sierra de Guadarrama NP	Rascafría	ES.IGN.SIGLIM.34132828120	4	34132828120	ES3	ES30	ES300	14923.4										99.9603	99.9951	93.7754	1.98514	82.1104	0.999603	1.00195	5.5162	0.992572	0.821104	86.6287	1.61968	11923.5	227.744	1087.28	90.65	91.9123	1.23996	0.804751	0.81997	0.944271	0.919123	-5.43849	-0.167694	0.101578	61.69	56	1.25598	1.19617
02-BUFFER	San Agustín del Guadalix	28129																			99.8698	99.841	39.135	1.88502	99.6911	0.998698	1.00041	2.30206	0.942509	0.996911	24.8118	0.0939309	3683.66	258.622	2973.09	89.08	100	0.383076	0.913859	2.24215	0.927917	1	9.34005	-0.120167	0.459716	5.82	86	0.00763184	0.610547
02-BUFFER	San Lorenzo de El Escorial	28131																			99.7658	99.9801	52.3036	1.85859	92.163	0.997658	1.0018	3.07668	0.929297	0.92163	38.5414	0.432803	13198.1	377.104	979.789	89.14	78.3838	1.37251	1.33252	0.738905	0.928542	0.783838	3.12637	-0.14015	0.461479	30.9	70	0.665779	0.887705
02-BUFFER	Santa María de la Alameda	28135																			99.9527	99.5723	2.77813	1.97291	98.241	0.999527	0.997718	0.163419	0.986455	0.98241	-17.4094	-0.948165	5521.59	1055.59	403.567	87.34	75.7013	0.574209	3.72999	0.304349	0.909792	0.757013	25.5071	-0.0681745	0.113776	75.3	44	0.343938	0.859845
02-BUFFER	La Serna del Monte	28138																			100	99.9483	0	1.9444	100	1	1.00149	0	0.972199	1	-20.5263	-1.0251	3157.12	2241.69	516.394	81.25	100	0.32832	7.92116	0.389437	0.846354	1	109.705	0.202603	0.121238	67.38	60	1.36986	0
01-SIZ	Soto del Real	28144	Sierra de Guadarrama NP	Soto del Real	ES.IGN.SIGLIM.34132828144	4	34132828144	ES3	ES30	ES300	4283.31										99.8748	99.8227	43.5068	1.84738	95.9257	0.998748	1.00023	2.55922	0.923692	0.959257	28.8229	0.192932	4240.84	2581.87	2176.46	90.85	83.105	0.441019	9.1232	1.64137	0.946354	0.83105	159.66	0.363254	0.379633	45.94	75	0.232369	1.16185
02-BUFFER	Valdemanco	28158																			99.7443	98.155	0.000406235	1.92295	92.5809	0.997443	0.983517	2.38962e-05	0.961477	0.925809	-22.6346	-1.07713	4173.77	141.63	1999.44	92.67	76.4035	0.434045	0.50046	1.50788	0.965313	0.764035	-16.5654	-0.203478	0.203238	78.69	59	0.10917	1.0917
02-BUFFER	Villavieja del Lozoya	28182																			99.8769	99.958	40.4047	1.97066	100	0.998769	1.00158	2.37675	0.985328	1	27.2485	0.154073	10702.2	108.527	386.433	80	100	1.11295	0.383486	0.291427	0.833333	1	-27.576	-0.238887	0.0974669	48.62	15	0.374532	3.74532
02-BUFFER	Lozoyuela-Navas-Sieteiglesias	28901																			99.8355	99.9955	0	1.9317	97.4093	0.998355	1.00196	0	0.965848	0.974093	-21.1949	-1.0416	4919.91	1353.42	920.509	86.17	100	0.511638	4.78239	0.6942	0.897604	1	57.7166	0.0354095	0.135823	83.08	41	0.242522	2.42522
01-SIZ	Onís	33043	Picos de Europa NP	Onís	ES.IGN.SIGLIM.34033333043	4	34033333043	ES1	ES12	ES120	7540.79										99.9712	98.3334	29.8931	1.99181	99.103	0.999712	0.985304	1.75842	0.995903	0.99103	14.6073	-0.157934	11229.2	7902.52	760.189	85.16	17.5339	1.16776	27.9241	0.573295	0.887083	0.175339	514.551	1.50457	0.0916515	14.42	3	0.13459	0
01-SIZ	Peñamellera Alta	33046	Picos de Europa NP	Peñamellera Alta	ES.IGN.SIGLIM.34033333046	4	34033333046	ES1	ES12	ES120	9216.41										99.9773	99.0998	0.566419	1.99586	98.5862	0.999773	0.992984	0.0333188	0.997929	0.985862	-19.8027	-1.00724	11829.2	524.411	205.213	90.6	99.8248	1.23016	1.85304	0.154761	0.94375	0.998248	3.59923	-0.138629	0.0717742	35.68	9	0.183824	0
01-SIZ	Peñamellera Baja	33047	Picos de Europa NP	Peñamellera Baja	ES.IGN.SIGLIM.34033333047	4	34033333047	ES1	ES12	ES120	8381.92										99.977	98.936	7.90684	1.99319	95.7937	0.99977	0.991342	0.465108	0.996594	0.957937	-11.785	-0.809344	17393	79.0073	577.127	85.41	99.0777	1.80876	0.279178	0.435239	0.889687	0.990777	-11.9271	-0.188561	0.113431	28.02	23	0.0793021	0
01-SIZ	Camaleño	39015	Picos de Europa NP	Camaleño	ES.IGN.SIGLIM.34063939015	4	34063939015	ES1	ES13	ES130	16205.8										100	99.9864	63.7488	2	99.2937	1	1.00187	3.74993	1	0.992937	54.8947	0.836432	14384	235.259	1346.44	84.65	83.1611	1.49584	0.831303	1.01542	0.881771	0.831611	1.11884	-0.146606	0.0720126	33.6	27	0.206186	0
01-SIZ	Cillorigo de Liébana	39022	Picos de Europa NP	Cillorigo de Liébana	ES.IGN.SIGLIM.34063939022	4	34063939022	ES1	ES13	ES130	10451.6										99.9891	99.6528	67.5924	1.98913	99.5222	0.999891	0.998525	3.97602	0.994566	0.995222	59.2845	0.94478	11674.9	74.8831	1002.59	89.18	84.6899	1.21412	0.264604	0.756098	0.928958	0.846899	-19.7865	-0.213837	0.102109	30.07	38	0.151515	0
01-SIZ	Tresviso	39088	Picos de Europa NP	Tresviso	ES.IGN.SIGLIM.34063939088	4	34063939088	ES1	ES13	ES130	1622.39										100	99.7468	100	2	100	1	0.999467	5.88235	1	1	97.6364	1.89137	9549.14	3135.03	1687.06	79.17	-117.703	0.993047	11.0778	1.2723	0.824688	-1.17703	159.817	0.363758	0.0599435	42.11	12	1.42857	0
02-BUFFER	Acebedo	24001																			100	99.9616	100	1.99194	100	1	1.00162	5.88235	0.995968	1	97.5988	1.89045	8721.31	138.222	20.8995	92.86	100	0.906958	0.488416	0.0157613	0.967292	1	-32.4315	-0.254502	0.0641188	3.26	-10	1.46341	0
02-BUFFER	Boca de Huérgano	24020																			99.989	99.8748	99.9979	1.99498	100	0.99989	1.00075	5.88223	0.997488	1	97.6071	1.89065	6066.92	1296.31	21.4775	84.23	89.0604	0.630919	4.58059	0.0161972	0.877396	0.890604	39.9141	-0.0218425	0.0379631	53.33	1	1.91489	0
02-BUFFER	Burón	24025																			100	99.9498	100	1.99623	100	1	1.0015	5.88235	0.998117	1	97.6394	1.89145	15233.3	462.653	21.2844	87.5	100	1.58416	1.63481	0.0160516	0.911458	1	2.92966	-0.140783	0.0424681	1.17	-5	1.53846	0
02-BUFFER	Caravia	33013																			99.9883	99.0351	9.55791	1.96267	100	0.999883	0.992336	0.56223	0.981333	1	-9.28437	-0.747625	44267.4	22.6312	900.56	80.69	98.1557	4.60352	0.079969	0.679155	0.840521	0.981557	43.6944	-0.00968529	0.177047	42.96	54	0.211864	0
02-BUFFER	Colunga	33019																			99.9645	99.6501	14.3423	1.95881	97.9101	0.999645	0.998498	0.843662	0.979406	0.979101	-3.99376	-0.617043	53095.3	153.6	2163.66	92.24	99.5589	5.52155	0.542755	1.63172	0.960833	0.995589	93.049	0.149037	0.175662	37.3	24	0.610465	0.581395
02-BUFFER	Llanes	33036																			99.7506	97.7971	4.97384	1.93205	99.4804	0.997506	0.979931	0.292579	0.966025	0.994804	-15.3831	-0.898153	18203.6	730.755	6624.89	87.13	61.5903	1.89305	2.58217	4.99615	0.907604	0.615903	119.898	0.235381	0.214398	31.43	40	0.167163	0.436078
02-BUFFER	Parres	33045																			99.9404	98.1466	9.26092	1.98041	98.3773	0.999404	0.983433	0.54476	0.990205	0.983773	-9.9685	-0.76451	20711.9	37.7712	1650.51	87.17	88.7489	2.1539	0.133467	1.24473	0.908021	0.887489	6.55221	-0.129133	0.194643	15.24	37	2.22676	0
02-BUFFER	Piloña	33049																			99.9651	97.8318	4.51499	1.98872	98.9513	0.999651	0.980279	0.265588	0.99436	0.989513	-15.4122	-0.89887	16465.7	104.653	1539.06	88.4	67.2396	1.71233	0.369799	1.16068	0.920833	0.672396	-3.27935	-0.16075	0.153936	12.06	26	0.292561	0
02-BUFFER	San Bartolomé	35018																			99.8686	100	31.8421	1.76236	100	0.998686	1.002	1.87306	0.881181	1	15.0987	-0.145807	152.036	6.40492	13811.9	90.46	48.6163	0.0158107	0.0226322	10.4162	0.942292	0.486163	137.663	0.292513	0.49341	14.36	88	0.115075	0.21919
02-BUFFER	Teguise	35024																			99.9359	100	50.9571	1.91059	100	0.999359	1.002	2.99747	0.955295	1	39.0826	0.446162	285.812	22.3876	6285.42	87.27	31.3104	0.0297225	0.0791081	4.74014	0.909062	0.313104	21.4227	-0.0813098	0.257671	28.21	80	0.105042	0
02-BUFFER	Tías	35028																			99.7012	100	29.9358	1.69757	100	0.997012	1.002	1.76093	0.848785	1	12.1746	-0.217978	274.639	9.6812	33932.4	87.74	53.744	0.0285606	0.0342092	0.113411	0.913958	0.53744	-67.4484	-0.367115	0.446699	21.89	85	0.606091	0.15027
01-SIZ	Tinajo	35029	Timanfaya NP	Tinajo	ES.IGN.SIGLIM.34053535029	4	34053535029	ES7	ES70	ES708	13935.9										99.9384	100	64.3051	1.94712	100	0.999384	1.002	3.78265	0.973558	1	55.152	0.842782	57.7662	0.797639	186537	88.62	56.0514	0.0060073	0.00281851	140.677	0.923125	0.560514	2743.38	8.67237	0.185041	17.6	79	0.0165893	0.331785
01-SIZ	Yaiza	35034	Timanfaya NP	Yaiza	ES.IGN.SIGLIM.34053535034	4	34053535034	ES7	ES70	ES708	21760.2										99.9341	100	65.9796	1.88928	100	0.999341	1.002	3.88115	0.944642	1	56.5428	0.87711	32.7597	4.37754	160035	91.04	39.228	0.00340679	0.0154683	120.69	0.948333	0.39228	2340.99	7.37831	0.238998	23.46	85	0.129175	0.184536
02-BUFFER	Baiona	36003																			99.6741	98.0286	2.04605	1.85492	80.3957	0.996741	0.982251	0.120356	0.927458	0.803957	-23.3847	-1.09565	29386.9	87.8396	51817.9	92.74	99.9962	3.05604	0.310387	0.173188	0.966042	0.999962	10.1125	-0.117683	0.464394	34.58	70	0.164352	0.082176
01-SIZ	Bueu	36004	Islas Atlánticas de Galicia NP	Bueu	ES.IGN.SIGLIM.34123636004	4	34123636004	ES1	ES11	ES114	3063.96										99.4607	99.9342	19.1287	1.84293	77.1786	0.994607	1.00135	1.12522	0.921466	0.771786	-3.71151	-0.610076	42342.5	26.0058	51855.3	89.98	91.1413	4.40334	0.0918933	0.173313	0.937292	0.911413	30.3451	-0.0526159	0.483478	17.49	65	0.164677	0.0823384
02-BUFFER	Caldas de Reis	36005																			99.844	96.7796	0	1.93936	85.5465	0.99844	0.969736	0	0.969678	0.855465	-24.1336	-1.11413	39971	20.5104	855.251	88.15	90.6453	4.15672	0.0724751	0.644985	0.918229	0.906453	33.9773	-0.0409349	0.337491	7.85	59	0.203562	0.305344
02-BUFFER	Cambados	36006																			99.1428	99.3238	15.68	1.73462	100	0.991428	0.995229	0.922353	0.867309	1	-4.47362	-0.628886	9917.22	31.5356	56854.7	87.66	88.0809	1.03133	0.111433	0.190022	0.913125	0.880809	-37.4657	-0.270692	0.508433	8.13	66	0.143885	0.503597
02-BUFFER	Cangas	36008																			98.8036	99.0915	11.1339	1.68799	79.9529	0.988036	0.992901	0.654934	0.843996	0.799529	-14.4121	-0.874186	33451.4	51.6009	182265	87.84	46.8208	3.47873	0.182335	0.609174	0.915	0.468208	13.0689	-0.108175	0.511352	13.03	68	0.154775	0.302001
02-BUFFER	Catoira	36010																			99.6299	96.1421	0.665811	1.94121	95.9052	0.996299	0.963348	0.0391654	0.970607	0.959052	-21.4306	-1.04742	39001.4	52.8511	19973.8	85.2	-47.3182	4.05589	0.186753	15.0632	0.8875	-0.473182	294.403	0.796581	0.303686	4.28	56	0.599341	0
02-BUFFER	Gondomar	36021																			99.6025	98.9402	0.00117286	1.90862	77.9633	0.996025	0.991385	6.89919e-05	0.954308	0.779633	-25.5716	-1.14962	41421.3	71.0364	160.473	89.76	98.5247	4.30754	0.251012	0.12102	0.935	0.985247	31.9963	-0.0473055	0.378816	15.66	71	0.140519	0
02-BUFFER	O Grove	36022																			99.4276	99.7372	28.9638	1.70935	95.068	0.994276	0.99937	1.70375	0.854676	0.95068	10.0552	-0.27029	28016.9	73.058	144634	83.22	71.6536	2.91357	0.258155	0.483403	0.866875	0.716536	4.77071	-0.134862	0.503371	28.77	64	0.186116	0.651405
02-BUFFER	Marín	36026																			99.7744	99.6084	0	1.75038	64.2299	0.997744	0.99808	0	0.875191	0.642299	-29.7337	-1.25235	51000	50.5121	57024.4	88.57	93.2577	5.30367	0.178488	0.19059	0.922604	0.932577	50.5585	0.0123894	0.511015	7.28	68	0.0852377	0.243536
02-BUFFER	Meis	36028																			99.9064	97.6264	0	1.9505	88.3091	0.999064	0.978221	0	0.97525	0.883091	-23.2875	-1.09325	46984.8	21.5843	870.832	89.13	88.1456	4.8861	0.0762696	0.656736	0.928437	0.881456	48.5801	0.00602688	0.273633	8.82	52	0.856307	0
02-BUFFER	Moaña	36029																			99.1342	99.8265	0.0812953	1.73734	80.864	0.991342	1.00027	0.00478208	0.86867	0.80864	-26.526	-1.17318	51821.3	30.934	39402.7	86.07	73.2539	5.38907	0.109307	0.131694	0.896562	0.732539	45.1835	-0.00489634	0.509485	3.23	66	0.113175	0
02-BUFFER	Mos	36033																			99.0247	99.4311	0	1.79177	69.8219	0.990247	0.996304	0	0.895886	0.698219	-28.3869	-1.21911	25361.6	20.3499	333.195	86.57	39.1773	2.63744	0.0719077	0.251278	0.901771	0.391773	-14.9167	-0.198175	0.441238	4.58	67	0.13217	0
02-BUFFER	Nigrán	36035																			99.0168	99.7526	1.40082	1.5735	75.7644	0.990168	0.999525	0.0824013	0.786748	0.757644	-27.6703	-1.20142	23365.3	18.6045	54231	91.91	96.6502	2.42984	0.0657405	0.181253	0.957396	0.966502	-7.98544	-0.175885	0.507481	34.63	69	0.226989	0
02-BUFFER	Pazos de Borbén	36037																			99.5206	91.9418	0.255525	1.92302	84.3878	0.995206	0.92126	0.0150309	0.961512	0.843878	-25.2623	-1.14199	37454.8	30.9307	500.876	74.21	99.9996	3.89505	0.109296	0.377734	0.773021	0.999996	23.1018	-0.0759098	0.224831	17.7	49	0.668673	1.00301
02-BUFFER	O Porriño	36039																			99.5492	99.5913	6.40363	1.76823	87.2486	0.995492	0.997909	0.376684	0.884117	0.872486	-17.4662	-0.949568	26719.2	26.4533	353.107	87.74	99.6941	2.77862	0.0934746	0.266295	0.913958	0.996941	0.985772	-0.147034	0.44832	7.06	71	0.102041	0.357143
02-BUFFER	Portas	36040																			99.3576	99.5708	0	1.86988	80.4042	0.993576	0.997703	0	0.934939	0.804042	-25.3948	-1.14526	21354.6	15.9412	1053.97	91.1	77.0589	2.22074	0.0563292	0.794848	0.948958	0.770589	-4.1708	-0.163617	0.32134	6.4	45	0.66313	0
02-BUFFER	Ponteareas	36042																			99.761	98.6467	0.84855	1.94218	82.1885	0.99761	0.988444	0.0499147	0.97109	0.821885	-23.4211	-1.09655	35500.2	46.404	503.634	89.18	94.9336	3.69179	0.163972	0.379815	0.928958	0.949336	22.2773	-0.0785614	0.382358	13.62	63	0.0873629	0.480496
02-BUFFER	Redondela	36045																			98.7218	97.727	0.597476	1.68627	61.3436	0.987218	0.979229	0.0351457	0.843135	0.613436	-30.8367	-1.27958	28344	27.917	57580.6	86.62	85.6572	2.94759	0.0986465	0.192449	0.902292	0.856572	-0.0489854	-0.150362	0.518593	6.49	68	0.136091	0.204137
02-BUFFER	Ribadumia	36046																			99.4878	99.463	4.53888	1.89997	99.0098	0.994878	0.996623	0.266993	0.949984	0.990098	-16.0285	-0.914081	17401.7	25.6589	2113.21	85.75	100	1.80966	0.0906673	1.59367	0.893229	1	7.74456	-0.125298	0.421127	4.14	59	0.393623	0
02-BUFFER	Sanxenxo	36051																			98.9456	98.8987	7.05019	1.75631	88.842	0.989456	0.990969	0.414717	0.878156	0.88842	-16.7657	-0.932276	24896.9	43.6975	100507	86.79	53.6238	2.58912	0.154408	0.335918	0.904062	0.536238	-9.60515	-0.181094	0.483998	13.54	64	0.121803	0.0580013
02-BUFFER	Tui	36055																			99.3553	99.7728	21.076	1.86323	82.0587	0.993553	0.999727	1.23976	0.931617	0.820587	-0.295072	-0.525752	27528.9	43.3031	681.32	89.95	99.9997	2.86282	0.153014	0.513816	0.936979	0.999997	9.33254	-0.120191	0.424316	7.62	62	0.118624	0.59312
02-BUFFER	Valga	36056																			99.6957	97.0791	3.36403	1.93759	79.4368	0.996957	0.972737	0.197884	0.968793	0.794368	-21.3852	-1.0463	20502.4	59.9012	20405.5	89.46	99.9997	2.13211	0.211665	15.3888	0.931875	0.999997	293.288	0.792997	0.336712	4.78	59	0.334113	0
01-SIZ	Vigo	36057	Islas Atlánticas de Galicia NP	Vigo	ES.IGN.SIGLIM.34123636057	4	34123636057	ES1	ES11	ES114	11009.2										99.2417	99.808	4.08478	1.38041	71.5374	0.992417	1.00008	0.240281	0.690205	0.715374	-27.2328	-1.19063	19341.6	24.8351	166638	85.54	99.2139	2.0114	0.0877567	0.556946	0.891042	0.992139	-9.2143	-0.179837	0.271594	8.54	67	0.518796	0.535862
02-BUFFER	Vilaboa	36058																			99.4546	95.8466	2.35564	1.86982	75.5496	0.994546	0.960387	0.138567	0.934908	0.755496	-24.3219	-1.11878	59846.7	50.749	6699.15	89.35	97.3452	6.22366	0.179325	5.05215	0.930729	0.973452	167.186	0.387459	0.349656	6.93	59	0.348663	0
01-SIZ	Vilagarcía de Arousa	36060	Islas Atlánticas de Galicia NP	Vilagarcía de Arousa	ES.IGN.SIGLIM.34123636060	4	34123636060	ES1	ES11	ES114	4421.93										99.2639	96.6309	1.18797	1.69809	97.0296	0.992639	0.968246	0.0698806	0.849047	0.970296	-22.9978	-1.0861	35165.8	20.3049	98242.2	84.2	73.9225	3.65701	0.0717487	0.32835	0.877083	0.739225	13.4684	-0.106891	0.499269	12.69	65	0.106726	0.453587
02-BUFFER	Vilanova de Arousa	36061																			99.6061	95.575	0	1.86565	98.6711	0.996061	0.957665	0	0.932826	0.986711	-22.5347	-1.07467	20825.1	19.6407	59972.7	86.15	49.6059	2.16567	0.0694018	0.200443	0.897396	0.496059	-23.4205	-0.225523	0.452893	11.51	59	0.202683	0.386063
02-BUFFER	A Illa de Arousa	36901																			99.8371	99.0923	21.2236	1.72416	100	0.998371	0.992909	1.24845	0.862078	1	2.03613	-0.468214	14633.2	23.0835	270188	92.38	96.3547	1.52175	0.0815672	0.903036	0.962292	0.963547	-11.3561	-0.186725	0.477177	18.69	66	0.402576	0
01-SIZ	Adeje	38001	Teide NP	Adeje	ES.IGN.SIGLIM.34053838001	4	34053838001	ES7	ES70	ES709	11065.4										99.7507	96.64	50.2545	1.85266	91.7366	0.997507	0.968336	2.95615	0.926332	0.917366	35.3137	0.353138	2715.21	62.6128	48588.1	91.97	94.1298	0.282364	0.221247	36.6426	0.958021	0.941298	680.91	2.03957	0.501616	32.58	84	0.258365	0.213525
01-SIZ	Agulo	38002	Garajonay NP	Agulo	ES.IGN.SIGLIM.34053838002	4	34053838002	ES7	ES70	ES706	2627.89										100	99.9217	55.2671	2	94.8125	1	1.00122	3.25101	1	0.948125	44.007	0.567705	16402.2	14.6554	18709.3	85.42	88.1488	1.70572	0.0517857	14.1096	0.889792	0.881488	252.767	0.662682	0.187328	0	33	0.281426	1.87617
01-SIZ	Alajeró	38003	Garajonay NP	Alajeró	ES.IGN.SIGLIM.34053838003	4	34053838003	ES7	ES70	ES706	5195.39										99.9835	98.5405	46.1978	1.97077	98.958	0.999835	0.98738	2.71752	0.985387	0.98958	33.594	0.310691	1843.56	419.574	14175.7	83.67	100	0.191717	1.48259	10.6905	0.871563	1	184.728	0.443873	0.17699	7.26	65	1.059	0.504286
02-BUFFER	Arafo	38004																			99.9037	99.9987	62.746	1.91951	78.8117	0.999037	1.00199	3.69094	0.959753	0.788117	48.7967	0.685923	10260.9	38.6589	12510.2	89.58	50.3337	1.06707	0.136604	9.43458	0.933125	0.503337	141.494	0.304834	0.341162	8.34	61	0.0180799	0.361598
01-SIZ	Arico	38005	Teide NP	Arico	ES.IGN.SIGLIM.34053838005	4	34053838005	ES7	ES70	ES709	18695.9										99.8888	99.9999	40.9075	1.9594	81.8302	0.998888	1.002	2.40632	0.979698	0.818302	24.1043	0.0764684	3052.08	41.2745	141781	85.85	98.8218	0.317396	0.145846	106.924	0.894271	0.988218	2085.4	6.55633	0.18596	44.08	63	0.276534	0.131683
02-BUFFER	Arona	38006																			99.4184	100	13.7993	1.76754	93.6307	0.994184	1.002	0.811724	0.883768	0.936307	-7.44028	-0.702109	283.01	97.0392	67843.8	89.39	99.4906	0.0294311	0.342895	51.1643	0.931146	0.994906	969.253	2.96686	0.515486	36.6	84	0.335741	0.0506778
01-SIZ	Barlovento	38007	Caldera de Taburiente NP	Barlovento	ES.IGN.SIGLIM.34053838007	4	34053838007	ES7	ES70	ES707	4550.22										100	99.0637	62.8201	2	56.3638	1	0.992622	3.6953	1	0.563638	45.0312	0.592984	14054.3	32.2879	16866	73.68	10.509	1.46155	0.114092	12.7195	0.7675	0.10509	203.354	0.503772	0.191689	27.14	44	0.107585	0.537924
01-SIZ	Breña Alta	38008	Caldera de Taburiente NP	Breña Alta	ES.IGN.SIGLIM.34053838008	4	34053838008	ES7	ES70	ES707	3247.34										99.7836	99.9694	57.8984	1.94232	48.4295	0.997836	1.0017	3.40579	0.971162	0.484295	37.2155	0.400078	16450.4	13.0562	18362.9	82.38	10.509	1.71073	0.0461351	13.8484	0.858125	0.10509	231.369	0.593868	0.398992	3.11	66	1.69948	0.283246
02-BUFFER	Breña Baja	38009																			99.6282	99.9987	21.0123	1.84854	90.6054	0.996282	1.00199	1.23602	0.924268	0.906054	1.29221	-0.486575	10245.3	11.2397	28449.4	85.89	100	1.06545	0.0397162	21.455	0.894687	1	389.098	1.10112	0.465623	4.66	69	0.0184026	0
02-BUFFER	Buenavista del Norte	38010																			99.9688	99.7419	82.7487	1.97527	93.5986	0.999688	0.999418	4.86757	0.987634	0.935986	75.8059	1.35256	3908.86	98.9929	6408.59	79.47	-11.995	0.406496	0.349798	4.83302	0.827812	-0.11995	25.9436	-0.0667709	0.237081	8.69	61	0.0416927	0.625391
02-BUFFER	Candelaria	38011																			99.672	99.9998	40.1271	1.89673	77.2642	0.99672	1.002	2.36042	0.948366	0.772642	21.6029	0.0147294	8835.83	53.786	28797.5	85.09	78.1422	0.918867	0.190056	21.7176	0.886354	0.781422	389.885	1.10365	0.508613	24.6	73	0.0810343	0.331504
01-SIZ	Fasnia	38012	Teide NP	Fasnia	ES.IGN.SIGLIM.34053838012	4	34053838012	ES7	ES70	ES709	4723.23										99.9806	99.9961	39.7429	1.98564	71.8406	0.999806	1.00196	2.33782	0.992822	0.718406	21.0163	0.000252164	1118.08	12.5296	194593	86.76	100	0.116273	0.0442743	146.752	0.90375	1	2876.32	9.09989	0.22442	20	45	0.0729129	0.364564
02-BUFFER	Fuencaliente de la Palma	38014																			99.9607	96.0068	69.104	1.97661	79.6519	0.999607	0.961992	4.06494	0.988303	0.796519	56.2272	0.869321	4460.25	24.8109	26851.6	84.86	67.7211	0.463836	0.0876709	20.2501	0.883958	0.677211	347.256	0.966553	0.159478	0	49	0.0589971	0
01-SIZ	Garachico	38015	Teide NP	Garachico	ES.IGN.SIGLIM.34053838015	4	34053838015	ES7	ES70	ES709	2871.9										99.9362	94.6611	66.6392	1.9502	96.8107	0.999362	0.948508	3.91995	0.975098	0.968107	56.2205	0.869156	11139.8	35.4016	30064.2	85.05	91.8816	1.15847	0.125094	22.6728	0.885937	0.918816	415.223	1.18513	0.359961	8.48	61	0.0414336	0.621504
01-SIZ	Garafía	38016	Caldera de Taburiente NP	Garafía	ES.IGN.SIGLIM.34053838016	4	34053838016	ES7	ES70	ES707	10779.2										99.9794	98.7769	46.9544	1.99689	56.5167	0.999794	0.989748	2.76202	0.998443	0.565167	26.3035	0.130749	9502.71	92.3532	27240.3	74.44	100	0.988219	0.326336	20.5432	0.775417	1	372.663	1.04826	0.109032	34.65	32	1.32576	0
01-SIZ	Granadilla de Abona	38017	Teide NP	Granadilla de Abona	ES.IGN.SIGLIM.34053838017	4	34053838017	ES7	ES70	ES709	16957.4										99.7726	99.9979	23.9476	1.9076	93.4564	0.997726	1.00198	1.40868	0.953799	0.934564	5.93512	-0.37198	2301.39	67.0616	60558.6	86.84	78.6782	0.239329	0.236967	45.6701	0.904583	0.786782	856.756	2.60508	0.435915	16.18	79	0.0491285	0.128161
01-SIZ	La Guancha	38018	Teide NP	La Guancha	ES.IGN.SIGLIM.34053838018	4	34053838018	ES7	ES70	ES709	2499.49										99.8047	92.4962	50.934	1.93977	92.9582	0.998047	0.926816	2.99611	0.969885	0.929582	36.4089	0.380169	9603.71	10.9664	57357.3	84.63	87.7243	0.998721	0.0387505	43.2559	0.881562	0.877243	821.043	2.49023	0.393758	1.12	66	0.387025	0.552893
01-SIZ	Guía de Isora	38019	Teide NP	Guía de Isora	ES.IGN.SIGLIM.34053838019	4	34053838019	ES7	ES70	ES709	15079.4										99.9259	97.3102	49.9102	1.95565	79.6397	0.999259	0.975052	2.9359	0.977825	0.796397	33.6886	0.313027	2949.53	36.2176	73636.9	89.39	86.4715	0.306731	0.127977	55.5331	0.931146	0.864715	1055.27	3.2435	0.327436	21.23	76	0.111993	0.389541
01-SIZ	Güímar	38020	Teide NP	Güímar	ES.IGN.SIGLIM.34053838020	4	34053838020	ES7	ES70	ES709	10737.9										99.7548	99.9849	46.0429	1.91452	80.5481	0.997548	1.00185	2.70841	0.957261	0.805481	29.411	0.207448	3877.63	13.7807	78411.1	83.94	99.1638	0.403247	0.0486952	59.1335	0.874375	0.991638	1129.03	3.4807	0.365954	23.11	65	0.114149	0.622633
01-SIZ	Hermigua	38021	Garajonay NP	Hermigua	ES.IGN.SIGLIM.34053838021	4	34053838021	ES7	ES70	ES706	4104.18										100	99.4513	76.5719	2	89.1081	1	0.996506	4.50423	1	0.891081	67.8363	1.15585	15249.2	13.2359	16631.1	78.95	100	1.58581	0.0467701	12.5423	0.822396	1	219.946	0.557132	0.20191	1.65	53	1.10619	0.553097
01-SIZ	Icod de los Vinos	38022	Teide NP	Icod de los Vinos	ES.IGN.SIGLIM.34053838022	4	34053838022	ES7	ES70	ES709	10026.8										99.8665	94.0424	60.4596	1.93363	91.8979	0.998665	0.942309	3.55645	0.966817	0.918979	47.6644	0.657974	11514.1	16.5779	77595.8	85.68	53.9951	1.19739	0.0585792	58.5187	0.8925	0.539951	1124.14	3.46498	0.417403	6.69	70	0.979697	0.620622
02-BUFFER	Los Llanos de Aridane	38024																			99.6988	99.9749	23.5875	1.80398	97.4574	0.996988	1.00175	1.3875	0.901989	0.974574	5.25609	-0.388739	903.528	8.34	14719.3	78.87	93.4473	0.0939609	0.02947	11.1005	0.821563	0.934473	159.6	0.363062	0.512763	6.89	66	0.104441	0.547073
02-BUFFER	La Matanza de Acentejo	38025																			99.2936	99.9929	33.5891	1.81341	77.0225	0.992936	1.00193	1.97583	0.906706	0.770225	12.9526	-0.198776	10876.1	12.5411	69464.6	80.64	100	1.13104	0.044315	0.232168	0.84	1	-35.0496	-0.262922	0.50598	9.79	71	0.237181	0.451773
01-SIZ	La Orotava	38026	Teide NP	La Orotava	ES.IGN.SIGLIM.34053838026	4	34053838026	ES7	ES70	ES709	21604.8										99.9109	99.9897	84.5758	1.96182	65.0473	0.999109	1.0019	4.97505	0.980912	0.650473	72.1489	1.2623	4255.33	5.70641	266265	84.54	96.6217	0.442525	0.020164	200.803	0.880625	0.966217	3962.25	12.5922	0.404522	4.52	73	0.344578	0.506024
01-SIZ	El Paso	38027	Caldera de Taburiente NP	El Paso	ES.IGN.SIGLIM.34053838027	4	34053838027	ES7	ES70	ES707	14312.2										99.7988	99.4979	78.2893	1.96168	82.0583	0.997988	0.996973	4.60525	0.980839	0.820583	68.0327	1.1607	11289.7	26.1522	21687.5	77.4	96.6217	1.17406	0.0924108	16.3556	0.80625	0.966217	287.89	0.775636	0.211766	13.46	60	0.267953	0.535906
02-BUFFER	Puerto de la Cruz	38028																			99.0367	100	0.054266	1.2955	86.7619	0.990367	1.002	0.00319212	0.647749	0.867619	-29.7814	-1.25353	0	0	333579	80.44	81.615	0	0	1.1149	0.837917	0.81615	-44.6206	-0.293702	0.037754	29.34	61	0.466107	0.632574
01-SIZ	Puntagorda	38029	Caldera de Taburiente NP	Puntagorda	ES.IGN.SIGLIM.34053838029	4	34053838029	ES7	ES70	ES707	3246.99										100	99.9695	25.7374	2	87.5552	1	1.0017	1.51397	1	0.875552	7.82436	-0.32535	5227.63	14.7455	33257.5	63.75	83.0485	0.543639	0.0521041	25.081	0.664062	0.830485	443.427	1.27583	0.206898	17.46	59	0.049776	0.99552
01-SIZ	Puntallana	38030	Caldera de Taburiente NP	Puntallana	ES.IGN.SIGLIM.34053838030	4	34053838030	ES7	ES70	ES707	3685.51										100	99.999	52.6167	2	70.0419	1	1.00199	3.0951	1	0.700419	35.9503	0.368849	10978.3	13.1368	11890.2	85.4	68.0782	1.14167	0.0464199	8.96698	0.889583	0.680782	134.509	0.282369	0.228733	8.82	54	0.0411692	0.823384
01-SIZ	Los Realejos	38031	Teide NP	Los Realejos	ES.IGN.SIGLIM.34053838031	4	34053838031	ES7	ES70	ES709	5912.06										99.8669	98.0298	53.9781	1.90142	89.0587	0.998669	0.982262	3.17518	0.950712	0.890587	39.9482	0.467526	10498.4	15.7518	73062.2	85.03	92.9317	1.09177	0.0556601	55.0997	0.885729	0.929317	1061.24	3.2627	0.525921	7.88	73	0.0690265	0.248495
01-SIZ	San Andrés y Sauces	38033	Caldera de Taburiente NP	San Andrés y Sauces	ES.IGN.SIGLIM.34053838033	4	34053838033	ES7	ES70	ES707	4506.31										99.9526	99.9987	76.2746	1.98352	76.6497	0.999526	1.00199	4.48674	0.991761	0.766497	64.9304	1.08413	23618.2	15.9131	14924	85.9	100	2.45613	0.0562302	11.2549	0.894792	1	213.24	0.535567	0.283162	4.85	57	0.483676	2.17654
01-SIZ	San Juan de la Rambla	38034	Teide NP	San Juan de la Rambla	ES.IGN.SIGLIM.34053838034	4	34053838034	ES7	ES70	ES709	2158.38										99.8487	94.0949	56.3107	1.91568	90.8144	0.998487	0.942835	3.31239	0.957839	0.908144	42.3939	0.52789	9170.66	11.2345	66837.7	80.6	96.5706	0.953688	0.0396978	50.4055	0.839583	0.965706	964.083	2.95024	0.404555	9.6	69	0.041425	0.621375
02-BUFFER	San Miguel de Abona	38035																			99.5773	100	1.43998	1.77672	94.8182	0.995773	1.002	0.0847046	0.888361	0.948182	-21.6195	-1.05208	500.957	26.8755	55828	89.86	81.2868	0.0520962	0.0949664	42.1026	0.936042	0.812868	779.971	2.35814	0.479422	3.42	79	0.0158839	0.105893
01-SIZ	San Sebastián de la Gomera	38036	Garajonay NP	San Sebastián de la Gomera	ES.IGN.SIGLIM.34053838036	4	34053838036	ES7	ES70	ES706	11863.5										99.9382	99.3969	40.3199	1.96648	95.5938	0.999382	0.995961	2.37176	0.983238	0.955938	26.1256	0.126357	4196.12	80.3786	18143.9	84.69	100	0.436368	0.284023	13.6832	0.882188	1	225.715	0.575683	0.249223	14.26	73	1.36986	0.799087
01-SIZ	Santa Cruz de la Palma	38037	Caldera de Taburiente NP	Santa Cruz de la Palma	ES.IGN.SIGLIM.34053838037	4	34053838037	ES7	ES70	ES707	4564.92										99.8915	99.9922	71.5805	1.9617	80.1257	0.998915	1.00193	4.21062	0.980848	0.801257	59.8712	0.959261	13846.2	17.6949	4369.7	81.7	47.1318	1.43991	0.0625261	3.2954	0.851042	0.471318	22.404	-0.0781541	0.472958	4.14	67	0.770169	1.09107
02-BUFFER	Santa Úrsula	38039																			99.5185	99.9959	46.7395	1.81151	82.7663	0.995185	1.00196	2.74938	0.905753	0.827663	29.5989	0.212085	18422.5	13.9732	16299.2	84.27	100	1.91582	0.0493751	12.292	0.877812	1	222.701	0.56599	0.510203	2.05	76	0.148002	0.422863
01-SIZ	Santiago del Teide	38040	Teide NP	Santiago del Teide	ES.IGN.SIGLIM.34053838040	4	34053838040	ES7	ES70	ES709	5441.32										99.9423	96.3071	67.5134	1.94089	94.3577	0.999423	0.965001	3.97137	0.970447	0.943577	56.9964	0.888307	3725.16	28.2783	29031.2	88.72	81.214	0.387392	0.0999232	21.8938	0.924167	0.81214	382.348	1.07941	0.379963	43.42	52	0.38767	0.0945537
02-BUFFER	Los Silos	38042																			99.8687	98.9393	51.1076	1.9618	99.3376	0.998687	0.991376	3.00633	0.980898	0.993376	39.4133	0.454324	12647.3	26.784	18427	84.72	-3.09415	1.31523	0.0946432	13.8967	0.8825	-0.0309415	223.163	0.567477	0.373059	12.17	53	0.412541	0
02-BUFFER	El Tanque	38044																			99.9892	93.281	62.5085	1.97157	98.0922	0.999892	0.93468	3.67697	0.985787	0.980922	51.5651	0.754251	8457.68	83.8719	9306.9	89.32	67.1661	0.879542	0.296367	7.01878	0.930417	0.671661	95.9353	0.158319	0.284115	7.43	61	0.0754717	0.754717
02-BUFFER	Tazacorte	38045																			99.6805	100	10.8118	1.91382	95.0735	0.996805	1.002	0.63599	0.956908	0.950735	-9.15117	-0.744337	1048.28	2.71027	44726.5	71.84	63.5883	0.109015	0.00957693	0.149487	0.748333	0.635883	-66.9541	-0.365525	0.477316	10.01	58	0.454545	0.21645
01-SIZ	Tijarafe	38047	Caldera de Taburiente NP	Tijarafe	ES.IGN.SIGLIM.34053838047	4	34053838047	ES7	ES70	ES707	5640.62										100	99.9768	35.7164	2	91.6251	1	1.00177	2.10096	1	0.916251	20.3797	-0.0154612	6267	21.9232	28014.1	78.36	100	0.651726	0.077467	21.1267	0.81625	1	373.444	1.05077	0.196516	8.94	53	0.772201	0
01-SIZ	Valle Gran Rey	38049	Garajonay NP	Valle Gran Rey	ES.IGN.SIGLIM.34053838049	4	34053838049	ES7	ES70	ES706	3384.07										99.9147	99.07	61.7649	1.97368	100	0.999147	0.992685	3.63323	0.986842	1	52.2381	0.770862	4995.95	70.7767	9514.39	78.05	95.5105	0.519546	0.250094	7.17526	0.813021	0.955105	94.2604	0.152933	0.334443	0.25	66	0.503317	0
01-SIZ	Vallehermoso	38050	Garajonay NP	Vallehermoso	ES.IGN.SIGLIM.34053838050	4	34053838050	ES7	ES70	ES706	11417.3										100	98.9963	55.5721	2	98.1385	1	0.991947	3.26895	1	0.981385	44.8456	0.588403	9172.88	188.273	12061	74.04	84.6467	0.953919	0.665276	9.09577	0.77125	0.846467	146.654	0.321427	0.1463	3.74	31	0.769746	0
02-BUFFER	La Victoria de Acentejo	38051																			99.5833	99.9815	52.9133	1.88201	87.5696	0.995833	1.00182	3.11255	0.941006	0.875696	38.538	0.43272	19895.2	15.6608	14716	84.55	84.2013	2.06897	0.0553384	11.098	0.880729	0.842013	198.901	0.489453	0.496324	4.89	71	0.22299	0.557476
01-SIZ	Vilaflor de Chasna	38052	Teide NP	Vilaflor de Chasna	ES.IGN.SIGLIM.34053838052	4	34053838052	ES7	ES70	ES709	5878.29										99.976	97.8559	55.0188	1.9882	83.9667	0.99976	0.98052	3.2364	0.994099	0.839667	41.0089	0.493706	6707.6	41.8072	22681.2	89.48	94.1677	0.697546	0.147729	17.1049	0.932083	0.941677	296.48	0.80326	0.157134	8.86	60	0	1.23839
02-BUFFER	Villa de Mazo	38053																			99.7611	95.7601	22.7433	1.95344	83.2208	0.997611	0.95952	1.33784	0.976722	0.832208	2.078	-0.46718	9006.18	15.539	11156.6	82.85	100	0.936583	0.054908	8.4137	0.863021	1	125.364	0.252961	0.229694	1.15	52	0.418235	0
02-BUFFER	Ponga	33050																			100	99.5638	99.8903	1.99941	99.1243	1	0.997634	5.8759	0.999707	0.991243	97.2896	1.88282	17957.2	639.28	12.3334	81.14	-56.3861	1.86743	2.25894	0.00930119	0.845208	-0.563861	-11.6596	-0.187701	0.0520297	25.66	25	0.160514	0
02-BUFFER	Ribadedeva	33055																			99.7575	99.1789	5.68793	1.93686	99.8431	0.997575	0.993776	0.334584	0.96843	0.998431	-14.1441	-0.867571	28000	8.0414	2118.11	89.38	59.1317	2.91181	0.0284148	1.59737	0.931042	0.591317	21.199	-0.0820292	0.206641	20.62	42	0.0570451	0
02-BUFFER	Ribadesella	33056																			99.8069	97.4608	7.77888	1.93029	100	0.998069	0.976561	0.457581	0.965143	1	-12.0529	-0.815957	34827.1	21.4998	4282.22	88.56	99.4108	3.62179	0.0759709	3.22942	0.9225	0.994108	76.8758	0.0970245	0.244781	40.28	43	0.346081	0.692161
02-BUFFER	Cabezón de Liébana	39013																			99.9688	99.8161	47.1043	1.99488	99.9245	0.999688	1.00016	2.77084	0.997441	0.999245	35.3475	0.353972	20107.7	196.338	677.674	88.38	100	2.09106	0.693773	0.511066	0.920625	1	4.33053	-0.136277	0.0838318	30.3	17	0.168067	0
02-BUFFER	Herrerías	39033																			100	98.6173	2.19694	1.99506	98.8719	1	0.988149	0.129232	0.997532	0.988719	-17.9274	-0.960949	46882.7	53.3949	936.054	83.45	83.5324	4.87549	0.188675	0.705923	0.869271	0.835324	49.4937	0.00896507	0.113985	30.08	35	0.160514	0
02-BUFFER	Lamasón	39034																			100	98.0898	20.0769	2	97.0952	1	0.982864	1.18099	1	0.970952	2.69618	-0.451923	10200.4	143.461	1422.21	91.87	100	1.06078	0.506931	1.07255	0.956979	1	-8.05522	-0.176109	0.0585484	21.1	-2	0.331126	0
02-BUFFER	Peñarrubia	39049																			100	99.7244	69.0647	2	99.6593	1	0.999242	4.06263	1	0.996593	61.1694	0.991302	14336.8	60.4463	610.214	82.61	100	1.49094	0.213591	0.460191	0.860521	1	-19.4952	-0.2129	0.0732971	0.53	14	1.20482	0
02-BUFFER	Polaciones	39053																			100	99.3739	100	1.99933	99.8131	1	0.99573	5.88235	0.999665	0.998131	97.5176	1.88844	16471.9	544.764	896.381	86.61	100	1.71297	1.92496	0.676004	0.902188	1	24.3224	-0.0719845	0.0475828	0	13	0.41841	0
02-BUFFER	Potes	39055																			99.7855	99.5256	24.0458	1.9138	96.4091	0.997855	0.997251	1.41446	0.956898	0.964091	6.61103	-0.355297	23073.1	53.1827	747.827	83.02	67.8563	2.39945	0.187925	0.563972	0.864792	0.678563	-6.10601	-0.169841	0.374078	30.36	53	1.49031	2.23547
02-BUFFER	Rionansa	39063																			100	96.5485	14.2982	2	97.9779	1	0.96742	0.841069	1	0.979779	-4.23464	-0.622988	11503.5	83.2829	1337.85	85.18	95.9902	1.19629	0.294286	1.00894	0.887292	0.959902	-13.066	-0.192224	0.0868149	21.89	27	1.91388	0
02-BUFFER	Val de San Vicente	39095																			99.7912	99.7091	21.7007	1.93938	98.7904	0.997912	0.999089	1.27651	0.96969	0.987904	4.62217	-0.404386	68209.1	23.4381	76302.8	85.23	92.4896	7.09329	0.0828201	0.255023	0.887813	0.924896	84.8768	0.122756	0.211467	41.29	56	0.0356633	0
02-BUFFER	Vega de Liébana	39096																			100	99.7742	70.8719	2	99.8866	1	0.999741	4.16894	1	0.998866	63.3509	1.04515	15745.2	193.141	469.415	92.2	81.0196	1.6374	0.682477	0.354008	0.960417	0.810196	-11.1101	-0.185934	0.0715994	24.85	16	0.130719	0
02-BUFFER	Abades	40001																			99.7868	97.4845	0.00051478	1.96057	100	0.997868	0.976799	3.02812e-05	0.980287	1	-20.9003	-1.03433	301.14	4.65748	645.833	91.67	100	0.0313165	0.0164575	0.487054	0.954896	1	-50.2055	-0.311663	0.148617	17.28	43	0.115741	1.15741
02-BUFFER	Adrada de Pirón	40002																			100	99.9858	0	1.99522	88.9352	1	1.00186	0	0.997609	0.889352	-22.2235	-1.06699	2051.85	76.2636	439.439	100	100	0.213379	0.269483	0.331402	1.04167	1	-42.8814	-0.288109	0.0604266	53.95	13	2.43902	0
01-SIZ	Aldealengua de Pedraza	40007	Sierra de Guadarrama NP	Aldealengua de Pedraza	ES.IGN.SIGLIM.34074040007	4	34074040007	ES4	ES41	ES416	3519.18										100	99.9942	92.8556	1.99481	99.9998	1	1.00195	5.4621	0.997403	0.999998	89.2289	1.68386	11697.2	132.128	844.261	100	100	1.21643	0.466883	0.636698	1.04167	1	-12.7665	-0.19126	0.0465822	57.48	-22	1.25	0
02-BUFFER	Arahuetes	40019																			100	100	99.9978	1.99304	96.7666	1	1.002	5.88223	0.996519	0.967666	96.9683	1.87488	5009.78	100.193	1732.45	100	100	0.520984	0.35404	1.30652	1.04167	1	-15.5357	-0.200166	0.0456993	61.97	-13	4.87805	0
02-BUFFER	Arcones	40020																			99.9676	99.9766	70.8233	1.96741	100	0.999676	1.00177	4.16608	0.983707	1	63.0246	1.03709	4695.54	269.09	1285.85	89.23	39.997	0.488305	0.950848	0.969721	0.929479	0.39997	-25.2335	-0.231354	0.0786848	60.99	-41	1.25786	0
02-BUFFER	Arevalillo de Cega	40021																			100	100	38.4843	1.99271	100	1	1.002	2.26378	0.996357	1	25.2429	0.104572	5291.95	72.1481	1677.54	100	100	0.550327	0.25494	1.26511	1.04167	1	-17.7591	-0.207317	0.0497206	47.62	-18	3.7037	0
01-SIZ	Basardilla	40026	Sierra de Guadarrama NP	Basardilla	ES.IGN.SIGLIM.34074040026	4	34074040026	ES4	ES41	ES416	1903.88										100	99.9242	67.5237	1.99411	99.9948	1	1.00124	3.97198	0.997055	0.999948	59.4046	0.947744	4871.31	386.786	371.49	96.08	82.1846	0.506584	1.36674	0.280159	1.00083	0.821846	-20.4769	-0.216057	0.085923	33.33	62	0.684932	0
02-BUFFER	Bernuy de Porreros	40031																			99.8384	99.9457	0	1.94887	100	0.998384	1.00146	0	0.974435	1	-20.5144	-1.0248	783.129	88.1232	422.659	91.52	100	0.0814402	0.31139	0.318748	0.953333	1	-46.7018	-0.300395	0.243986	41.77	53	0.131234	0
02-BUFFER	Brieva	40033																			100	99.9816	0	1.99598	100	1	1.00182	0	0.997991	1	-20.0038	-1.0122	791.013	70.2433	432.371	100	83.6929	0.0822601	0.248209	0.326072	1.04167	0.836929	-49.2973	-0.308742	0.068802	62.5	54	1.02041	0
02-BUFFER	Caballar	40034																			100	99.9957	44.3932	1.99411	100	1	1.00196	2.61137	0.997053	1	32.2076	0.276473	1914.84	83.9317	1723.26	96.15	89.9659	0.199131	0.296578	1.29959	1.00156	0.899659	-26.0696	-0.234043	0.0689889	59.68	-16	1.0989	0
02-BUFFER	Cabañas de Polendos	40035																			100	99.9676	0	1.99609	100	1	1.00168	0	0.998047	1	-20.0055	-1.01224	878.834	35.3795	597.211	90.2	76.3079	0.0913929	0.125016	0.450386	0.939583	0.763079	-52.6109	-0.319398	0.0752038	61.98	41	1.1236	0
01-SIZ	Collado Hermoso	40059	Sierra de Guadarrama NP	Collado Hermoso	ES.IGN.SIGLIM.34074040059	4	34074040059	ES4	ES41	ES416	1636.61										100	99.9943	100	1.99624	99.9356	1	1.00195	5.88235	0.998121	0.999356	97.6355	1.89135	9015.46	327.881	519.036	85.25	100	0.937548	1.15859	0.39143	0.888021	1	-12.4883	-0.190366	0.0888888	56.36	36	0.8	0
02-BUFFER	Cubillo	40062																			100	99.9907	100	1.99732	100	1	1.00191	5.88235	0.998658	1	97.6584	1.89192	2200.09	108.445	1737.6	72.22	100	0.228795	0.383199	1.31041	0.752292	1	-26.5061	-0.235446	0.0514117	59.26	-11	1.38889	0
02-BUFFER	Encinillas	40072																			100	78.3563	0	1.99198	100	1	0.785133	0	0.995988	1	-24.3776	-1.12015	245.323	6.09466	654.075	93.1	100	0.0255119	0.0215359	0.493269	0.969792	1	-49.7978	-0.310352	0.146476	33.85	21	0.352113	0
01-SIZ	El Espinar	40076	Sierra de Guadarrama NP	El Espinar	ES.IGN.SIGLIM.34074040076	4	34074040076	ES4	ES41	ES416	20498.7										99.8967	99.9212	92.3873	1.93364	99.9963	0.998967	1.00121	5.43455	0.966819	0.999963	88.0302	1.65428	6926.48	993.112	279.957	92.43	88.2795	0.720308	3.50923	0.211129	0.962813	0.882795	25.7255	-0.0674722	0.201011	51.88	66	0.251229	0.43692
02-BUFFER	Espirdo	40077																			99.9908	96.9601	0	1.9911	100	0.999908	0.971544	0	0.995551	1	-20.6599	-1.02839	485.68	62.4285	419.372	94.44	92.655	0.0505075	0.220595	0.316269	0.98375	0.92655	-50.0466	-0.311151	0.177962	47.42	68	0.240385	0
01-SIZ	Gallegos	40093	Sierra de Guadarrama NP	Gallegos	ES.IGN.SIGLIM.34074040093	4	34074040093	ES4	ES41	ES416	2176.69										100	99.9995	92.4206	1.99524	100	1	1.002	5.4365	0.997622	1	88.7225	1.67136	5639.88	778.427	913.41	90.91	100	0.58651	2.75063	0.688846	0.946979	1	19.4592	-0.0876243	0.0596711	72.57	-2	1.08696	0
02-BUFFER	Garcillán	40094																			99.9238	99.9734	0	1.97882	100	0.999238	1.00174	0	0.989412	1	-20.1923	-1.01685	161.253	1.18482	655.794	95.74	100	0.0167692	0.00418665	0.494565	0.997292	1	-49.7437	-0.310178	0.131569	22.22	28	0.222222	0
02-BUFFER	Hontanares de Eresma	40101																			99.7123	99.0075	0	1.8975	100	0.997123	0.992059	0	0.94875	1	-21.2414	-1.04274	2050.85	31.4893	634.824	95.29	92.4437	0.213275	0.11127	0.478751	0.992604	0.924437	-45.5933	-0.29683	0.364506	32.09	60	0.0733676	0
02-BUFFER	Los Huertos	40103																			100	99.9158	0	1.99578	100	1	1.00116	0	0.99789	1	-20.019	-1.01257	2459.12	33.7539	659.323	93.44	100	0.255732	0.119272	0.497227	0.973333	1	-43.0887	-0.288775	0.0892109	28.04	24	0.571429	0
02-BUFFER	Ituero y Lama	40104																			99.7339	99.9142	82.0599	1.88245	100	0.997339	1.00114	4.82706	0.941224	1	75.3353	1.34094	1492.43	93.4629	321.918	92.31	95.5544	0.155203	0.330258	0.242774	0.961562	0.955544	-47.0932	-0.301653	0.148945	87.9	47	0.286533	0
02-BUFFER	Juarros de Riomoros	40105																			99.6461	98.5944	2.00915	1.93998	100	0.996461	0.98792	0.118186	0.969991	1	-18.5489	-0.976289	2813.52	34.0166	635.31	89.29	100	0.292587	0.1202	0.479118	0.930104	1	-43.5598	-0.29029	0.0611438	58.97	31	1.81818	0
02-BUFFER	Lastras del Pozo	40111																			99.9467	99.9947	25.5778	1.98781	92.2716	0.999467	1.00195	1.50458	0.993906	0.922716	8.45235	-0.30985	1573.93	17.1626	655.682	90	100	0.163678	0.0606451	0.494481	0.9375	1	-46.8739	-0.300948	0.0464287	47.5	8	1.38889	0
02-BUFFER	La Lastrilla	40112																			99.2293	99.6915	0	1.7217	100	0.992293	0.998912	0	0.86085	1	-22.9589	-1.08514	394.62	19.9671	379.664	92.9	78.3745	0.0410378	0.070555	0.286323	0.967708	0.783745	-57.0126	-0.333554	0.46864	18.37	86	0.0536193	0.536193
01-SIZ	La Losa	40113	Sierra de Guadarrama NP	La Losa	ES.IGN.SIGLIM.34074040113	4	34074040113	ES4	ES41	ES416	2798.67										99.9294	99.9514	97.2991	1.95565	100	0.999294	1.00152	5.72348	0.977825	1	94.0423	1.80267	7168.88	168.34	465.275	92.59	100	0.745515	0.594843	0.350886	0.964479	1	-26.8855	-0.236667	0.123776	47.8	61	0.185874	1.85874
02-BUFFER	Martín Miguel	40119																			99.8419	99.8649	0	1.95606	100	0.998419	1.00065	0	0.978031	1	-20.458	-1.02341	86.1468	0.510111	652.068	94.87	100	0.00895869	0.00180251	0.491756	0.988229	1	-50.1851	-0.311597	0.115585	32.54	23	0.471698	0
02-BUFFER	Marugán	40122																			99.7101	99.9983	45.4554	1.75911	100	0.997101	1.00199	2.67385	0.879557	1	31.0499	0.247898	1512.64	30.4496	515.473	93.79	100	0.157304	0.107596	0.388743	0.976979	1	-47.3876	-0.3026	0.136596	84.47	44	0.160514	0
02-BUFFER	Matabuena	40123																			99.9988	99.9994	83.2489	1.98787	100	0.999988	1.002	4.89699	0.993933	1	77.8582	1.40321	5415.89	581.268	1051.68	95.18	100	0.563217	2.05395	0.793123	0.991458	1	8.03494	-0.124364	0.0924154	62.28	13	0.60241	0
02-BUFFER	La Matilla	40125																			100	99.8913	0	1.97892	79.9087	1	1.00091	0	0.989458	0.799087	-24.2108	-1.11604	1179.53	37.8695	1669.1	94.59	100	0.122663	0.133815	1.25875	0.985313	1	-29.9892	-0.246648	0.105267	62.73	-4	1.02041	0
02-BUFFER	Monterrubio	40131																			99.9988	100	84.0722	1.98857	92.9868	0.999988	1.002	4.94542	0.994287	0.929868	77.4314	1.39268	2278.84	30.0446	658.892	89.29	100	0.236984	0.106165	0.496902	0.930104	1	-44.5969	-0.293626	0.0456827	65.04	41	1.6129	0
01-SIZ	Navafría	40139	Sierra de Guadarrama NP	Navafría	ES.IGN.SIGLIM.34074040139	4	34074040139	ES4	ES41	ES416	3044.36										99.9603	99.9912	100	1.98703	100	0.999603	1.00192	5.88235	0.993514	1	97.5477	1.88919	14558.2	233.686	647.223	93.02	100	1.51396	0.825744	0.488102	0.968958	1	-4.06478	-0.163276	0.0954222	44.27	17	6.57895	0
02-BUFFER	Navas de San Antonio	40146																			99.9794	99.8859	87.6027	1.97773	100	0.999794	1.00086	5.1531	0.988866	1	82.8524	1.52648	664.442	484.32	89.6081	93.4	99.4329	0.0690975	1.71138	0.0675778	0.972917	0.994329	-23.6941	-0.226403	0.0710275	47.75	12	0.285714	0
02-BUFFER	Orejana	40150																			100	99.9958	0	1.98928	95.5123	1	1.00196	0	0.994641	0.955123	-20.9655	-1.03594	3498.98	76.1293	1724.44	94.12	75	0.36387	0.269008	1.30048	0.980417	0.75	-26.7244	-0.236149	0.0534744	57.96	-10	1.53846	0
01-SIZ	Otero de Herreros	40152	Sierra de Guadarrama NP	Otero de Herreros	ES.IGN.SIGLIM.34074040152	4	34074040152	ES4	ES41	ES416	4369.1										99.8046	99.7891	94.7174	1.92911	100	0.998046	0.999891	5.57161	0.964554	1	90.6821	1.71973	1302.49	918.414	453.083	92.4	100	0.13545	3.24528	0.341692	0.9625	1	13.6984	-0.106151	0.13618	31.91	56	0.102564	1.02564
01-SIZ	Palazuelos de Eresma	40155	Sierra de Guadarrama NP	Palazuelos de Eresma	ES.IGN.SIGLIM.34074040155	4	34074040155	ES4	ES41	ES416	3669.84										99.5555	99.9836	56.5813	1.9036	100	0.995555	1.00184	3.32831	0.951798	1	45.5501	0.605791	4063.43	1157.82	330.514	95.19	39.2387	0.42257	4.09124	0.249257	0.991563	0.392387	22.9403	-0.0764294	0.310478	41.2	71	2.01005	0.386548
02-BUFFER	Pedraza	40156																			100	99.9797	50.8701	1.99397	100	1	1.0018	2.99236	0.996987	1	39.8229	0.464433	3198.93	113.675	1725.01	97.01	100	0.332668	0.40168	1.30091	1.01052	1	-19.0844	-0.211579	0.108559	47.21	34	0.773196	0
02-BUFFER	Pelayos del Arroyo	40157																			100	100	45.6585	1.9893	100	1	1.002	2.68579	0.994649	1	33.6489	0.312047	1408.56	54.6407	871.517	100	100	0.146481	0.193077	0.657253	1.04167	1	-39.2305	-0.276367	0.0703919	73.33	-71	2.17391	0
02-BUFFER	Rebollo	40165																			100	99.7426	9.32098	1.99263	100	1	0.999425	0.548293	0.996317	1	-9.11932	-0.743551	2515.07	32.481	627.094	91.43	100	0.26155	0.114774	0.472922	0.952396	1	-43.9672	-0.2916	0.0765175	59.02	-34	1.14943	0
02-BUFFER	Roda de Eresma	40173																			99.8135	100	0	1.89783	100	0.998135	1.002	0	0.948914	1	-21.0189	-1.03726	79.5355	7.77077	656.699	90.91	100	0.00827117	0.0274586	0.495248	0.946979	1	-50.4409	-0.31242	0.130487	22.41	41	0.540541	0
01-SIZ	Real Sitio de San Ildefonso	40181	Sierra de Guadarrama NP	Real Sitio de San Ildefonso	ES.IGN.SIGLIM.34074040181	4	34074040181	ES4	ES41	ES416	14483.6										99.9616	99.9913	99.9992	1.96306	99.9995	0.999616	1.00192	5.8823	0.981532	0.999995	97.3073	1.88325	16488.4	87.1063	378.753	91.34	-14.2009	1.71468	0.307796	0.285636	0.951458	-0.142009	-37.6488	-0.271281	0.180051	14.62	63	0.395108	0
01-SIZ	Santiuste de Pedraza	40188	Sierra de Guadarrama NP	Santiuste de Pedraza	ES.IGN.SIGLIM.34074040188	4	34074040188	ES4	ES41	ES416	2911.54										100	99.634	100	1.99646	100	1	0.998337	5.88235	0.998229	1	97.5784	1.88994	4105.72	168.294	1625.31	87.1	100	0.426968	0.594677	1.22572	0.907292	1	-16.9068	-0.204576	0.0576372	51.61	-21	1.0101	0
01-SIZ	Santo Domingo de Pirón	40190	Sierra de Guadarrama NP	Santo Domingo de Pirón	ES.IGN.SIGLIM.34074040190	4	34074040190	ES4	ES41	ES416	2756.91										100	99.9886	56.5073	1.99791	100	1	1.00189	3.32396	0.998955	1	46.496	0.629138	5450.82	152.61	362.589	100	100	0.566849	0.539257	0.273446	1.04167	1	-31.5756	-0.25175	0.0418881	25.45	32	1.63934	0
01-SIZ	Segovia	40194	Sierra de Guadarrama NP	Segovia	ES.IGN.SIGLIM.34074040194	4	34074040194	ES4	ES41	ES416	16350.2										99.8678	99.8459	48.7734	1.91444	95.8342	0.998678	1.00046	2.86903	0.95722	0.958342	35.6745	0.362043	1370.46	95.2357	478.571	90.6	60.6164	0.142518	0.336522	0.360914	0.94375	0.606164	-52.2026	-0.318085	0.493167	13.97	58	0.937089	0.772857
01-SIZ	Sotosalbos	40199	Sierra de Guadarrama NP	Sotosalbos	ES.IGN.SIGLIM.34074040199	4	34074040199	ES4	ES41	ES416	2391.4										100	99.9975	72.4082	1.9949	99.9376	1	1.00198	4.25931	0.997452	0.999376	65.1622	1.08985	6744.5	300.55	347.209	96.83	100	0.701384	1.06202	0.261847	1.00865	1	-19.3222	-0.212343	0.0667541	59.86	42	0.909091	0
01-SIZ	Torrecaballeros	40203	Sierra de Guadarrama NP	Torrecaballeros	ES.IGN.SIGLIM.34074040203	4	34074040203	ES4	ES41	ES416	4222.65										99.9156	99.9907	81.9251	1.98026	99.9762	0.999156	1.00191	4.81912	0.990128	0.999762	76.2016	1.36233	2634.25	721.358	342.558	89.85	38.9583	0.273944	2.54897	0.25834	0.935937	0.389583	-11.8646	-0.18836	0.155262	27.99	85	0.0746826	2.24048
02-BUFFER	Torreiglesias	40205																			99.974	99.9846	0.0181651	1.98892	96.582	0.99974	1.00185	0.00106854	0.994458	0.96582	-20.7413	-1.0304	1156.13	48.0642	423.299	91.8	100	0.12023	0.169838	0.31923	0.95625	1	-48.689	-0.306786	0.070886	39.42	-11	1.06383	0
01-SIZ	Torre Val de San Pedro	40206	Sierra de Guadarrama NP	Torre Val de San Pedro	ES.IGN.SIGLIM.34074040206	4	34074040206	ES4	ES41	ES416	4426.17										100	99.9594	100	1.9951	99.8431	1	1.0016	5.88235	0.997552	0.998431	97.5986	1.89044	8861.83	728.047	872.542	92.19	91.9255	0.921571	2.57261	0.658025	0.960313	0.919255	20.6354	-0.0838418	0.0601547	51.33	-9	0	0
01-SIZ	Trescasas	40207	Sierra de Guadarrama NP	Trescasas	ES.IGN.SIGLIM.34074040207	4	34074040207	ES4	ES41	ES416	3266.54										99.9272	99.9937	75.5342	1.98319	100	0.999272	1.00194	4.44319	0.991594	1	68.7199	1.17766	4469.54	1286.47	321.666	93.15	100	0.464803	4.54584	0.242583	0.970313	1	44.4707	-0.00718848	0.155647	35.6	77	0.0944287	0.944287
02-BUFFER	Turégano	40208																			99.9648	99.9759	25.3055	1.98666	100	0.999648	1.00176	1.48856	0.993328	1	9.666	-0.279895	2013.36	27.7005	657.748	94.25	97.7899	0.209376	0.0978817	0.49604	0.981771	0.977899	-44.7407	-0.294088	0.112119	41.32	34	0.39801	0.995025
02-BUFFER	Valdeprados	40211																			100	99.991	97.5347	2	89.3687	1	1.00191	5.73734	1	0.893687	92.6587	1.76852	1573.81	210.658	535.105	94.12	100	0.163665	0.744373	0.403548	0.980417	1	-34.1599	-0.260061	0.0601305	35.62	8	1.35135	0
02-BUFFER	Valdevacas y Guijar	40213																			100	100	46.2229	1.99186	100	1	1.002	2.71899	0.99593	1	34.3385	0.329068	1975.74	65.7998	1693.59	94.92	100	0.205464	0.232508	1.27722	0.98875	1	-25.9212	-0.233565	0.0718568	45.36	14	1.05263	0
02-BUFFER	Valseca	40214																			100	99.87	0	1.99151	100	1	1.0007	0	0.995755	1	-20.0709	-1.01386	396.474	21.6311	546.469	91.43	19.6422	0.0412307	0.0764349	0.412119	0.952396	0.196422	-66.428	-0.363833	0.101653	19.05	22	0.408163	0
02-BUFFER	Valverde del Majano	40216																			99.8529	99.5534	0.0015171	1.94163	100	0.998529	0.997529	8.9241e-05	0.970815	1	-20.6608	-1.02841	783.24	6.89671	641.829	96.57	100	0.0814517	0.02437	0.484034	1.00594	1	-48.0841	-0.30484	0.168172	27.07	58	0.093985	1.8797
02-BUFFER	Valleruela de Pedraza	40220																			100	100	0.0184219	1.9836	79.9985	1	1.002	0.00108364	0.991801	0.799985	-24.1025	-1.11336	1820.88	34.5479	1717.69	100	100	0.18936	0.122077	1.29539	1.04167	1	-27.0301	-0.237132	0.0813334	71.57	-4	0	0
02-BUFFER	Vegas de Matute	40223																			99.349	99.9992	100	1.89634	94.4791	0.99349	1.002	5.88235	0.948171	0.944791	95.416	1.83657	4041.32	252.529	235.518	82.19	100	0.420271	0.892328	0.177615	0.856146	1	-33.0728	-0.256565	0.102762	54.41	-17	0.377358	3.77358
02-BUFFER	Villacastín	40225																			99.8671	99.7374	56.6416	1.95777	98.0659	0.998671	0.999373	3.33186	0.978885	0.980659	45.7889	0.611685	1188.09	960.524	259.727	91.77	94.127	0.123554	3.39408	0.195872	0.955937	0.94127	12.2142	-0.110924	0.110295	21.77	55	1.33779	1.33779
02-BUFFER	Zarzuela del Monte	40233																			99.9083	99.9783	96.7385	1.96453	88.5086	0.999083	1.00179	5.6905	0.982263	0.885086	91.1744	1.73188	1053.47	41.1313	398.005	90.53	100	0.109554	0.14534	0.300155	0.943021	1	-50.0386	-0.311126	0.129248	30.89	36	0.197628	0
01-SIZ	Ortigosa del Monte	40901	Sierra de Guadarrama NP	Ortigosa del Monte	ES.IGN.SIGLIM.34074040901	4	34074040901	ES4	ES41	ES416	1540.51										99.537	99.9976	93.2025	1.90273	100	0.99537	1.00198	5.4825	0.951365	1	88.6243	1.66894	7093.51	682.056	456.437	88.96	100	0.737678	2.41009	0.344221	0.926667	1	8.37314	-0.123277	0.17481	49.24	59	0.181159	0
02-BUFFER	Marazoleja	40903																			99.9337	99.9671	0	1.97378	100	0.999337	1.00167	0	0.98689	1	-20.242	-1.01808	2240.28	19.9848	650.179	100	100	0.232974	0.0706177	0.490331	1.04167	1	-43.2882	-0.289417	0.0611024	30.54	-60	0.952381	0
01-SIZ	Navas de Riofrío	40904	Sierra de Guadarrama NP	Navas de Riofrío	ES.IGN.SIGLIM.34074040904	4	34074040904	ES4	ES41	ES416	1484.84										99.8334	99.8527	92.146	1.9035	100	0.998334	1.00053	5.42035	0.951749	1	87.4193	1.6392	6023.94	96.4183	453.88	84.37	100	0.626449	0.340701	0.342292	0.878854	1	-36.2341	-0.266731	0.149126	68.81	56	0.250627	0
02-BUFFER	San Cristóbal de Segovia	40906																			99.1856	99.8965	0	1.8021	100	0.991856	1.00097	0	0.901049	1	-22.1226	-1.06449	498.472	0.864353	399.293	90.78	70.7929	0.0518377	0.00305425	0.301126	0.945625	0.707929	-59.8086	-0.342546	0.489191	28.03	89	0	0.660502
02-BUFFER	Almensilla	41010																			99.3627	100	0.00098681	1.73458	100	0.993627	1.002	5.80477e-05	0.86729	1	-22.7404	-1.07974	1015.55	0.0552061	330.679	81.31	59.9097	0.105611	0.000195075	0.249381	0.846979	0.599097	-63.9747	-0.355944	0.479611	21.94	79	0.0168663	1.01198
01-SIZ	Aznalcázar	41012	Doñana NP	Aznalcázar	ES.IGN.SIGLIM.34014141012	4	34014141012	ES6	ES61	ES618	45042										99.9955	98.5795	53.0216	1.99515	99.4662	0.999955	0.987771	3.11892	0.997576	0.994662	41.9776	0.517615	473.023	66.5801	232.755	60.53	100	0.0491913	0.235266	0.175532	0.630521	1	-58.1898	-0.33734	0.0900991	1.84	67	0.0222568	1.33541
02-BUFFER	Benacazón	41015																			99.9038	99.5833	8.58353	1.935	81.8463	0.999038	0.997828	0.504914	0.967498	0.818463	-14.2452	-0.870066	1017.13	82.5549	300.406	79.09	87.8605	0.105775	0.291714	0.226551	0.823854	0.878605	-53.47	-0.322161	0.394169	1.67	73	0.0139528	0.83717
02-BUFFER	Bollullos de la Mitación	41016																			99.824	99.9633	0.321881	1.90538	100	0.99824	1.00164	0.0189342	0.952688	1	-20.57	-1.02618	1272.27	24.9103	356.837	74.8	86.4194	0.132308	0.0880223	0.269108	0.779167	0.864194	-57.344	-0.33462	0.347984	0.1	69	0.00951294	1.33181
02-BUFFER	Las Cabezas de San Juan	41020																			99.9279	100	1.91279	1.96127	85.2471	0.999279	1.002	0.112517	0.980634	0.852471	-21.0619	-1.03831	69.0318	7.0708	141.373	77.62	80.9443	0.00717885	0.0249852	0.106616	0.808542	0.809443	-64.8647	-0.358806	0.250275	1	74	0.127908	0.730905
02-BUFFER	Carrión de los Céspedes	41025																			99.1968	65.3091	0	1.73534	100	0.991968	0.6544	0	0.867668	1	-29.7193	-1.252	173.326	1.82718	25.5201	57.45	72.7212	0.0180247	0.00645647	0.019246	0.598438	0.727212	-72.6125	-0.383722	0.482093	4.85	51	0.0396197	1.58479
02-BUFFER	Castilleja del Campo	41030																			99.8632	99.0344	0	1.96177	100	0.998632	0.992329	0	0.980883	1	-20.5631	-1.026	137.603	4.13979	28.7492	71.73	67.4255	0.0143098	0.0146282	0.0216812	0.747188	0.674255	-70.5588	-0.377118	0.178347	8.5	48	0.159236	4.77707
02-BUFFER	Coria del Río	41034																			99.8948	100	3.12777	1.89269	100	0.998948	1.002	0.183987	0.946344	1	-17.3743	-0.9473	275.079	3.83844	204.017	74.71	77.0244	0.0286064	0.0135634	0.153859	0.778229	0.770244	-65.11	-0.359595	0.513838	4.26	71	0.130997	0.720485
02-BUFFER	Dos Hermanas	41038																			99.3425	100	2.71547	1.70156	100	0.993425	1.002	0.159733	0.850778	1	-19.8812	-1.00917	204.46	1.06302	52.1547	76.78	98.5441	0.0212625	0.00375624	0.0393324	0.799792	0.985441	-63.0083	-0.352836	0.578225	3.85	80	0.257259	0.882679
02-BUFFER	Gelves	41044																			99.1657	99.8883	6.89017	1.59534	100	0.991657	1.00088	0.405304	0.797669	1	-16.0897	-0.915593	330.845	0.264059	109.427	82.87	76.2071	0.0344057	0.00093307	0.0825239	0.863229	0.762071	-65.1367	-0.359681	0.403186	4.73	82	0.00994926	0.895433
02-BUFFER	Huévar del Aljarafe	41051																			99.8731	97.033	1.18248	1.92973	99.4158	0.998731	0.972274	0.0695579	0.964863	0.994158	-20.0083	-1.01231	470.453	10.4592	117.482	65.07	16.0803	0.048924	0.0369583	0.0885985	0.677812	0.160803	-79.7381	-0.406638	0.195076	4.95	64	0.0346861	1.04058
02-BUFFER	Lebrija	41053																			99.8714	99.9974	3.75217	1.96383	85.2529	0.998714	1.00198	0.220716	0.981917	0.852529	-18.8829	-0.984534	72.1876	19.3738	340.834	79.62	21.7646	0.00750703	0.0684586	0.257039	0.829375	0.217646	-72.3995	-0.383037	0.258435	2	73	0.437796	0.802627
02-BUFFER	Mairena del Aljarafe	41059																			99.3642	96.6204	1.08632	1.49908	100	0.993642	0.968141	0.0639011	0.74954	1	-24.4955	-1.12306	612.767	7.01874	239.072	82.04	77.4408	0.0637236	0.0248012	0.180295	0.854583	0.774408	-62.0438	-0.349734	0.127727	9.73	86	0.0879682	1.01163
02-BUFFER	Los Palacios y Villafranca	41069																			99.7656	100	0	1.89203	100	0.997656	1.002	0	0.946013	1	-21.0865	-1.03892	25.0952	3.16026	162.444	77.76	-14.8287	0.00260974	0.011167	0.122507	0.81	-0.148287	-84.0401	-0.420473	0.484143	2.08	77	0.11243	0.60137
02-BUFFER	Palomares del Río	41070																			99.6123	sin dato	0.594337	1.63834	100	0.996123	sin dato	0.034961	0.819171	1	-28.7436	-1.22791	232.581	0	246.157	84.02	54.4496	0.0241868	0	0.185639	0.875208	0.544496	-67.4094	-0.366989	0.505061	29.63	77	0.0118793	1.42552
02-BUFFER	Pilas	41075																			99.8847	96.8238	13.5623	1.90653	100	0.998847	0.970179	0.797782	0.953265	1	-5.59855	-0.656652	1271.83	4.46478	298.943	68	29.229	0.132262	0.0157766	0.225447	0.708333	0.29229	-72.5178	-0.383418	0.447072	3.02	69	0.14298	1.07235
01-SIZ	La Puebla del Río	41079	Doñana NP	La Puebla del Río	ES.IGN.SIGLIM.34014141079	4	34014141079	ES6	ES61	ES618	37514.1										99.9855	99.8367	45.4804	1.98371	99.337	0.999855	1.00037	2.67532	0.991855	0.99337	33.2153	0.301346	426.236	16.278	200.545	71.63	99.5361	0.0443257	0.0575196	0.15124	0.746146	0.995361	-60.1081	-0.343509	0.169976	4.31	74	0.00839349	0
02-BUFFER	Sanlúcar la Mayor	41087																			99.5298	95.856	7.2446	1.89668	88.1205	0.995298	0.960481	0.426153	0.948341	0.881205	-15.7705	-0.907713	902.07	91.2104	290.561	77.58	86.5589	0.0938093	0.322298	0.219126	0.808125	0.865589	-53.821	-0.32329	0.284303	13.25	72	0.147243	0.957079
02-BUFFER	Sevilla	41091																			99.5028	100	1.05451	1.37747	100	0.995028	1.002	0.06203	0.688736	1	-25.044	-1.1366	66.8952	12.1134	127.414	77.87	49.6689	0.00695665	0.0428036	0.0960889	0.811146	0.496689	-70.9263	-0.3783	0.500271	7.22	66	0.395107	0.832567
02-BUFFER	Umbrete	41094																			99.8069	100	0.184537	1.82559	100	0.998069	1.002	0.0108551	0.912793	1	-21.5256	-1.04976	1260.24	2.3963	348.535	86.53	-1.96229	0.131056	0.0084675	0.262847	0.901354	-0.0196229	-74.318	-0.389207	0.501935	8.05	73	0.0115009	1.3801
02-BUFFER	Utrera	41095																			99.9388	99.8229	2.06191	1.97255	69.8126	0.999388	1.00023	0.121289	0.986274	0.698126	-23.8939	-1.10821	162.07	36.089	73.968	69.05	77.626	0.0168542	0.127523	0.0557828	0.719271	0.77626	-66.0862	-0.362734	0.280986	7.33	72	0.27324	0.683099
02-BUFFER	Villamanrique de la Condesa	41097																			99.9727	99.8946	43.8742	1.97895	100	0.999727	1.00095	2.58084	0.989477	1	31.4198	0.257028	1649.9	55.3601	54.5907	61.4	74.5194	0.171579	0.195619	0.0411695	0.639583	0.745194	-64.1371	-0.356466	0.243427	0.69	68	0.0224517	1.12259
02-BUFFER	Isla Mayor	41902																			99.959	99.2993	5.45718	1.98092	100	0.99959	0.994983	0.321011	0.990459	1	-13.8792	-0.861032	0.121572	0.0218341	240.536	63.03	74.7304	1.26427e-05	7.71522e-05	0.1814	0.656563	0.747304	-68.2929	-0.369831	0.206625	0.76	76	0.0339616	1.01885
02-BUFFER	Alcaudete de la Jara	45006																			99.9721	99.6754	8.63166	1.99182	66.6625	0.999721	0.998752	0.507745	0.995909	0.666625	-16.625	-0.928804	1580.6	56.4858	303.166	88.99	57.4303	0.164372	0.199597	0.228632	0.926979	0.574303	-58.1223	-0.337123	0.103631	33.71	21	0.0572082	0.572082
02-BUFFER	Camuñas	45034																			99.9653	99.9036	7.22609	1.9596	100	0.999653	1.00104	0.425064	0.979799	1	-11.8889	-0.811909	639.937	8.55508	266.632	88.37	100	0.0665492	0.03023	0.20108	0.920521	1	-55.6324	-0.329115	0.12332	30.7	28	0.0562114	1.12423
02-BUFFER	Consuegra	45053																			99.9701	99.633	23.3871	1.98327	99.047	0.999701	0.998326	1.37571	0.991635	0.99047	7.11693	-0.342811	1125.13	60.3593	178.922	94.85	72.5891	0.117006	0.213284	0.134934	0.988021	0.725891	-56.4173	-0.331639	0.163316	7.93	51	0.197122	0.591366
02-BUFFER	Espinoso del Rey	45063																			99.9664	99.8546	15.5261	1.98924	56.8783	0.999664	1.00055	0.913303	0.994621	0.568783	-10.4617	-0.776682	8316.11	59.2547	519.51	94.55	87.0243	0.864821	0.209381	0.391787	0.984896	0.870243	-33.5775	-0.258188	0.0971025	54.58	-18	0.214592	0
01-SIZ	Hontanar	45075	Cabañeros NP	Hontanar	ES.IGN.SIGLIM.34084545075	4	34084545075	ES4	ES42	ES425	15170.6										100	99.9884	73.8054	1.99926	98.2259	1	1.00189	4.3415	0.99963	0.982259	66.5054	1.12301	7757.46	45.9454	214.947	88.24	100	0.806724	0.162351	0.162101	0.919167	1	-38.9931	-0.275604	0.0324875	52.53	-55	0.613497	0
02-BUFFER	Madridejos	45087																			99.9667	99.8833	25.4701	1.96177	100	0.999667	1.00083	1.49824	0.980887	1	9.59261	-0.281706	1098.36	61.9213	216.934	94.78	65.9738	0.114222	0.218803	0.1636	0.987292	0.659738	-57.1269	-0.333921	0.192448	19.08	55	0.188023	1.03413
02-BUFFER	Marjaliza	45092																			99.9838	99.9699	21.411	1.99454	90.441	0.999838	1.0017	1.25947	0.99727	0.90441	3.25385	-0.438158	1286.74	14.3839	41.2207	82.14	64.4714	0.133812	0.0508265	0.0310865	0.855625	0.644714	-65.6787	-0.361424	0.0615433	37.83	6	0.37037	3.7037
02-BUFFER	Mazarambroz	45096																			99.9807	99.9748	63.7987	1.99461	98.9854	0.999807	1.00175	3.75287	0.997306	0.989854	54.8317	0.834876	1867.54	74.2873	290.285	85.11	97.0214	0.194212	0.262499	0.218918	0.886563	0.970214	-49.3519	-0.308917	0.0707345	40.13	49	0.0794281	0.794281
02-BUFFER	Menasalbas	45098																			99.9779	99.9824	27.2072	1.98823	94.9371	0.999779	1.00183	1.60043	0.994113	0.949371	10.9103	-0.249183	2698.54	146.259	320.743	93.28	100	0.28063	0.516815	0.241888	0.971667	1	-39.78	-0.278135	0.120113	25.28	37	0.0365097	0.730194
02-BUFFER	Navahermosa	45109																			99.9646	99.9665	13.9349	1.9808	92.1785	0.999646	1.00167	0.819702	0.9904	0.921785	-5.33596	-0.65017	2515.61	35.9008	764.571	90.72	36.0079	0.261607	0.126858	0.576599	0.945	0.360079	-54.5971	-0.325786	0.162416	33.21	38	0.535045	1.07009
02-BUFFER	Los Navalmorales	45112																			99.9624	99.9587	6.11432	1.98395	83.9623	0.999624	1.00159	0.359666	0.991975	0.839623	-16.1504	-0.917091	2642.37	25.7117	578.791	88.83	100	0.274789	0.0908539	0.436494	0.925312	1	-45.451	-0.296372	0.144974	42.86	28	0.764234	1.14635
01-SIZ	Los Navalucillos	45113	Cabañeros NP	Los Navalucillos	ES.IGN.SIGLIM.34084545113	4	34084545113	ES4	ES42	ES425	35584.2										99.9937	99.9284	54.9189	1.99628	78.0914	0.999937	1.00129	3.23052	0.998139	0.780914	40.216	0.474134	7079.82	72.0536	277.301	89.55	75.1119	0.736254	0.254606	0.209126	0.932812	0.751119	-42.3216	-0.286308	0.0775094	37.62	4	0.177699	0.444247
02-BUFFER	Retamoso de la Jara	45146																			100	99.5047	1.71449	1.9966	94.5	1	0.997041	0.100852	0.998301	0.945	-19.1761	-0.991771	1609.58	18.7699	719.04	93.1	100	0.167385	0.0663248	0.542262	0.969792	1	-45.0847	-0.295194	0.0443073	28.95	-154	0.952381	0
02-BUFFER	Robledo del Mazo	45148																			100	99.9994	80.0648	1.99809	76.8146	1	1.002	4.70969	0.999045	0.768146	69.5777	1.19883	9939.65	52.2265	173.273	83.81	53.0351	1.03366	0.184546	0.130673	0.873021	0.530351	-44.955	-0.294777	0.0464792	55.34	-82	1.67224	0
02-BUFFER	San Bartolomé de las Abiertas	45150																			99.9869	99.4603	0.0137908	1.99008	78.1311	0.999869	0.996596	0.000811221	0.995038	0.781311	-24.5275	-1.12385	1045.73	11.1492	137.828	87.33	21.5846	0.108749	0.0393965	0.103943	0.909687	0.215846	-72.4476	-0.383192	0.0891565	56.31	0	0.215517	0
02-BUFFER	San Martín de Pusa	45152																			99.9868	97.8636	1.01818	1.99231	85.5986	0.999868	0.980597	0.059893	0.996156	0.855986	-22.15	-1.06517	985.149	11.8878	167.893	93.01	64.0519	0.102449	0.0420064	0.126616	0.968854	0.640519	-62.3911	-0.350851	0.0803484	26.38	15	0.145985	1.45985
02-BUFFER	San Pablo de los Montes	45153																			99.9841	99.4261	64.3552	1.98929	88.9847	0.999841	0.996253	3.7856	0.994647	0.889847	53.3238	0.797658	5812.51	42.4182	187.814	93.16	49.8311	0.604463	0.149888	0.141639	0.970417	0.498311	-52.7056	-0.319703	0.135449	36.68	50	0.0535619	1.07124
02-BUFFER	Santa Ana de Pusa	45155																			99.9523	99.6658	2.83177	1.97547	91.3156	0.999523	0.998655	0.166575	0.987735	0.913156	-18.6871	-0.979701	1501.32	30.7012	607.922	85.32	99.9994	0.156127	0.108485	0.458463	0.88875	0.999994	-47.7636	-0.30381	0.147527	66.85	-34	0.251889	0
02-BUFFER	Sonseca	45163																			99.8478	97.4982	0.0397432	1.92005	100	0.998478	0.976936	0.00233784	0.960024	1	-21.2445	-1.04282	401.253	17.5701	384.316	91.03	75.5049	0.0417277	0.0620852	0.289831	0.948229	0.755049	-58.0615	-0.336927	0.37961	5.49	65	0.180701	0.722804
02-BUFFER	Torrecilla de la Jara	45170																			100	99.7396	5.66153	1.99659	82.708	1	0.999394	0.333031	0.998297	0.82708	-16.844	-0.934209	3149.52	28.1492	804.22	86.08	72.4811	0.327529	0.0994672	0.606501	0.896667	0.724811	-46.9005	-0.301034	0.0565668	55.81	-16	0.840336	0
02-BUFFER	Urda	45177																			99.9834	99.7913	45.0373	1.9926	96.0834	0.999834	0.999913	2.64925	0.996299	0.960834	32.1226	0.274375	2448.6	49.5004	122.082	93.08	76.2865	0.254638	0.174913	0.092068	0.969583	0.762865	-54.9187	-0.32682	0.107586	16.04	39	0.0379363	0.758725
02-BUFFER	Las Ventas con Peña Aguilera	45182																			99.9808	99.9288	59.611	1.99078	93.6863	0.999808	1.00129	3.50653	0.995388	0.936863	48.7976	0.685943	2590.63	77.335	156.597	94.01	62.6292	0.269408	0.273268	0.118097	0.979271	0.626292	-54.6733	-0.326031	0.0880048	30.69	35	0.0874126	0.874126
02-BUFFER	Los Yébenes	45200																			99.9868	99.9882	66.8573	1.99438	96.4386	0.999868	1.00189	3.93278	0.997189	0.964386	57.9222	0.911156	3717.05	51.2993	86.1484	90.66	87.7031	0.386549	0.18127	0.0649686	0.944375	0.877031	-50.9161	-0.313948	0.0910731	9.25	53	0.332834	0.665668
01-SIZ	Los Baldios	53057	Sierra de Guadarrama NP	Los Baldios	ES.IGN.SIGLIM.34132853057	4	34132853057	ES3	ES30	ES300	509.163										100	100	99.8742	1.93668	96.4392	1	1.002	5.87495	0.968339	0.964392	96.1938	1.85577	15830.5	49.558	327.631	sin dato	sin dato	1.64626	0.175116	0.247082	sin dato	sin dato	-31.0513	-0.250064	sin dato	sin dato	sin dato	sin dato	sin dato
02-BUFFER	El Redegüelo	53058																			100	100	100	2	100	1	1.002	5.88235	1	1	97.6871	1.89263	1578.92	192.797	140	sin dato	sin dato	0.164197	0.681261	0.105581	sin dato	sin dato	-68.2987	-0.369849	sin dato	sin dato	sin dato	sin dato	sin dato
																								SIZ_Average	15.5288	Buff_Aver	23.4122		Tot_Average		21.0061					SIZ_Average	-28.7001	Buff_Aver	79.8301		Tot_Average		46.706					SIZ_Average	7.51524
																								SIZ_Desvest	37.8978	Buff_Desvest	41.385		Tot_Desvest		40.5156					SIZ_Desvest	49.2386	Buff_Desvest	366.747		Tot_Desvest		310.95					SIZ_Desvest	63.1125
																														Z_ENSI	SIZ_Average	0.699662	0.836432	SIZ_Median								Z_ECSI	SIZ_Average	0.290641	0.174458	SIZ_Median
																														Z_ENSI	Buff_Aver	0.171448	-0.428154	Buff_Median								Z_ECSI	Buff_Aver	-0.0759266	-0.132705	Buff_Median
																																												Z_ENSI	Z_ECSI	Z_SOSI
																																											Z_ENSI	1
																																											Z_ECSI	0.103751	1
																																											Z_SOSI	0.103863	-0.0471339	1
[truncated: 8 more columns]

## Sheet: 02-Ordesa-MP_NP
																					SASMU (ENSI)												SASMU (ECSI)												SASMU (SOSI)
																					Original data					Normalized data							Original data					Normalized data							Original data
																					EN02 CHANGE IN ARTIFICIAL AREA	EN09 INDEX OF BURNT FOREST AREA	EN10 PROTECTED AREA	EN14 HABITAT'S FRAGMENTATION INDEX	EN23 SOIL EROSION	EN02 CHANGE IN ARTIFICIAL AREA	EN09 INDEX OF BURNT FOREST AREA	EN10 PROTECTED AREA	EN14 HABITAT'S FRAGMENTATION INDEX	EN23 SOIL EROSION	ENSI	Z_ENSI	EC01 ATMOSPHERIC CARBON FIXATION SERVICES	EC02 PRODUCTIVE SERVICES FOR LIVESTOCK	EC06 VALUE OF RECREATIONAL SERVICES	EC06 UNEMPLOYMENT RATE	EC07 PUBLIC MUNICIPAL DEBT	EC01 ATMOSPHERIC CARBON FIXATION SERVICES	EC02 PRODUCTIVE SERVICES FOR LIVESTOCK	EC06 VALUE OF RECREATIONAL SERVICES	EC06 UNEMPLOYMENT RATE	EC07 PUBLIC MUNICIPAL DEBT	ECSI	Z_ECSI	SO01 POPULATION DENSITY	SO03 SECOND HOMES	SO04 SENILE DEPENDENCY INDEX	SO05 MEDICAL FACILITIES INDEX	SO06 INDEX OF EDUCATIONAL FACILITIES
											Target Value (TV)										100	99.8	17	2	100	1	1	1	1	1			9616	283	1.326 / 299.200	96	100	1	1	1	1	1			0.38	26.7	71	0.24	0.547
LOCATION	MUNICIPALITY NAME	MUNI_CODE	NATIONAL PARK NAME	NOMBRE_INE	INSPIREID	NATLEVEL	NATCODE	CODNUT1	CODNUT2	CODNUT3	Sup_Muni_Ha	clc90_cod1_Ha	clc90_cod2_Ha	clc90_cod3_Ha	clc90_cod5_Ha	clc06_cod1_Ha	clc06_cod2_Ha	clc06_cod3_Ha	clc06_cod5_Ha		CAL	IBFA	PA	HFI_2018	SERO	CAL	IBFA	PA	HFI_2018	SERO			ACFS	PSL	VRS	UR	PMD	ACFS	PSL	VRS	UR	PMD	ECSI	Z_ECSI	PD	SH	SDI	MFI	IEF
01-SIZ	Abla	04001	Sierra Nevada NP	Abla	ES.IGN.SIGLIM.34010404001	4	34010404001	ES6	ES61	ES611	4520.87										99.9348	99.9445	36.0527	1.98166	89.7664	0.999348	1.00145	2.12075	0.990832	0.897664	20.2007	-0.019878	3911.12	138.269	58.9268	71.91	71.6373	0.40673	0.488584	0.0444395	0.749062	0.716373	-51.8962	-0.3171	0.161729	21.75	36	1.57853	2.3678
01-SIZ	Abrucena	04002	Sierra Nevada NP	Abrucena	ES.IGN.SIGLIM.34010404002	4	34010404002	ES6	ES61	ES611	8361.08										99.9721	99.9975	80.8309	1.9899	63.1694	0.999721	1.00198	4.75476	0.994952	0.631694	67.6621	1.15155	6538.57	104.577	129.156	74.25	97.8544	0.679968	0.36953	0.0974026	0.773438	0.978544	-42.0224	-0.285346	0.114852	21.44	38	0.0854701	0.854701
01-SIZ	Alboloduy	04005	Sierra Nevada NP	Alboloduy	ES.IGN.SIGLIM.34010404005	4	34010404005	ES6	ES61	ES611	6968.07										100	99.9387	52.861	1.99574	91.4448	1	1.00139	3.10947	0.99787	0.914448	40.4636	0.480246	2109.89	143.593	77.5916	71.65	100	0.219415	0.507396	0.0585156	0.746354	1	-49.3664	-0.308964	0.0891848	4.97	36	0.163934	3.27869
02-BUFFER	Alcolea	04007																			100	99.9815	3.0169	1.9963	73.5198	1	1.00182	0.177465	0.998149	0.735198	-21.7474	-1.05523	3073.93	86.9887	4705.16	63.64	65.6956	0.319668	0.307381	3.54839	0.662917	0.656956	9.90618	-0.118346	0.104719	9.22	38	0.246609	3.69914
02-BUFFER	Alcóntar	04008																			100	99.9527	0.18189	1.99076	97.1766	1	1.00153	0.0106994	0.99538	0.971766	-20.4125	-1.02229	6901.55	73.8923	13.1638	77.53	68.8574	0.717715	0.261104	0.00992744	0.807604	0.688574	-50.3015	-0.311971	0.0733393	26.11	31	0.34662	0
02-BUFFER	Alhabia	04010																			99.8544	99.99	78.2119	1.9604	99.9044	0.998544	1.0019	4.6007	0.9802	0.999044	71.6078	1.24894	621.916	79.5999	39.2615	78.11	-302.948	0.0646751	0.281272	0.0296089	0.813646	-3.02948	-136.806	-0.590164	0.183044	11.71	54	0.147493	1.47493
02-BUFFER	Alhama de Almería	04011																			99.7754	84.2783	32.4539	1.95102	77.0591	0.997754	0.844472	1.90905	0.975512	0.770591	9.94762	-0.272944	2215.78	106.404	24.3323	87.88	37.7568	0.230426	0.375987	0.0183502	0.915417	0.377568	-61.645	-0.348452	0.333514	11.16	61	0.547495	1.36874
02-BUFFER	Alicún	04012																			100	100	47.8959	1.96599	67.0994	1	1.002	2.8174	0.982994	0.670994	29.4679	0.208852	1204.81	118.465	22.8194	91.78	-6.60416	0.125292	0.418605	0.0172092	0.956042	-0.0660416	-70.9779	-0.378466	0.190924	10.24	42	0.460829	4.60829
02-BUFFER	Almócita	04014																			100	99.9971	78.8486	1.99832	92.8354	1	1.00198	4.63815	0.999162	0.928354	71.3529	1.24265	1461.12	266.26	27.3775	83.61	85.4287	0.151947	0.940848	0.0206467	0.870938	0.854287	-43.2267	-0.289219	0.0702745	24.58	-7	0.574713	0
01-SIZ	Alsodux	04015	Sierra Nevada NP	Alsodux	ES.IGN.SIGLIM.34010404015	4	34010404015	ES6	ES61	ES611	2008.69										100	100	74.1715	1.99774	85.8075	1	1.002	4.36303	0.99887	0.858075	64.4396	1.07202	1037.48	98.3891	58.3915	88.57	99.6591	0.107891	0.347665	0.0440359	0.922604	0.996591	-51.6243	-0.316225	0.077726	28.26	4	0.757576	0
01-SIZ	Bayárcal	04020	Sierra Nevada NP	Bayárcal	ES.IGN.SIGLIM.34010404020	4	34010404020	ES6	ES61	ES611	3799.21										100	99.9995	75.1931	1.99819	83.7125	1	1.002	4.42312	0.999094	0.837125	65.2268	1.09145	6970.51	127.79	2618.81	75.81	86.2488	0.724886	0.451554	1.97497	0.789687	0.862488	-3.9283	-0.162837	0.0894329	28.76	30	0.330033	3.30033
01-SIZ	Beires	04023	Sierra Nevada NP	Beires	ES.IGN.SIGLIM.34010404023	4	34010404023	ES6	ES61	ES611	3880.41										100	99.8999	99.7073	1.98777	88.8411	1	1.001	5.86513	0.993884	0.888411	94.9686	1.82553	5541.64	140.578	143.754	59.52	97.9036	0.576293	0.496743	0.108412	0.62	0.979036	-44.3903	-0.292961	0.0486346	27.66	-31	0.909091	0
02-BUFFER	Bentarique	04028																			100	99.9972	90.4475	2	76.1187	1	1.00198	5.32044	1	0.761187	81.672	1.49735	740.065	155.223	34.5718	60.8	2.20205	0.0769619	0.548491	0.0260723	0.633333	0.0220205	-73.8624	-0.387742	0.14013	19.12	49	0.420168	0
02-BUFFER	Berja	04029																			99.9239	99.841	14.3008	1.97335	81.6576	0.999239	1.00041	0.841222	0.986675	0.816576	-7.11753	-0.694143	1945.31	108.518	8074.26	90.06	41.7032	0.202299	0.383454	6.08919	0.938125	0.417032	60.602	0.0446888	0.244736	9.48	67	0.178412	0.892061
01-SIZ	Canjáyar	04030	Sierra Nevada NP	Canjáyar	ES.IGN.SIGLIM.34010404030	4	34010404030	ES6	ES61	ES611	6687.4										99.9888	99.4788	94.8151	1.99446	70.6867	0.999888	0.996781	5.57736	0.997228	0.706867	85.5625	1.59337	2387.49	238.558	51.7291	80.76	94.277	0.248284	0.842962	0.0390114	0.84125	0.94277	-41.7145	-0.284356	0.132385	11.1	26	0.0817661	2.45298
02-BUFFER	Dalías	04038																			99.9887	99.9535	61.0458	1.99299	90.8812	0.999887	1.00154	3.59093	0.996493	0.908812	49.9532	0.714468	2644.87	168.142	17.9009	95.81	22.9013	0.275049	0.594143	0.0134999	0.998021	0.229013	-57.8055	-0.336104	0.153588	4.24	60	0.0250878	1.00351
02-BUFFER	Enix	04041																			100	98.0912	76.8107	1.99308	90.5858	1	0.982878	4.51828	0.996541	0.905858	68.071	1.16165	761.617	107.576	20361.6	83.19	83.0321	0.0792031	0.380126	15.3556	0.866563	0.830321	250.237	0.654545	0.0717819	59.43	45	0.230415	0
02-BUFFER	Felix	04043																			100	99.9848	60.2678	1.9981	84.9122	1	1.00185	3.54517	0.99905	0.849122	47.9038	0.663884	2584.14	189.38	17.9553	80.81	77.5585	0.268733	0.669189	0.013541	0.841771	0.775585	-48.6236	-0.306575	0.0813217	44.89	37	0.151286	1.51286
01-SIZ	Fiñana	04045	Sierra Nevada NP	Fiñana	ES.IGN.SIGLIM.34010404045	4	34010404045	ES6	ES61	ES611	13385.3										99.9878	99.9658	36.0328	1.99498	86.2703	0.999878	1.00166	2.11958	0.997492	0.862703	19.6263	-0.0340568	5868.63	82.5882	711.086	86.5	90.7053	0.610298	0.291831	0.536264	0.901042	0.907053	-35.0702	-0.262988	0.120726	12.8	46	0.0496524	2.48262
01-SIZ	Fondón	04046	Sierra Nevada NP	Fondón	ES.IGN.SIGLIM.34010404046	4	34010404046	ES6	ES61	ES611	9108.82										99.9881	99.9715	85.4456	1.99228	89.6538	0.999881	1.00172	5.02621	0.996138	0.896538	78.4097	1.41683	6064.51	156.028	1000.18	87.5	89.8863	0.630669	0.551337	0.754286	0.911458	0.898863	-25.0678	-0.230821	0.0940441	43.21	26	0.299401	1.99601
02-BUFFER	Gádor	04047																			99.9013	99.493	64.7412	1.95581	86.2812	0.999013	0.996924	3.80831	0.977903	0.862812	52.8992	0.787179	342.992	80.3397	27.6758	87.54	66.4695	0.0356689	0.283886	0.0208717	0.911875	0.664695	-61.6601	-0.3485	0.172955	1.81	57	0.0329272	1.31709
02-BUFFER	Gérgal	04050																			99.9938	99.9976	26.6864	1.99693	98.2512	0.999938	1.00198	1.56979	0.998463	0.982512	11.0536	-0.245645	3327.88	165.503	9.94759	78.98	86.2563	0.346077	0.584816	0.00750195	0.822708	0.862563	-47.5267	-0.303048	0.0618328	9.42	29	0.291262	1.94175
02-BUFFER	Huécija	04051																			100	99.9708	76.8115	1.99561	83.1072	1	1.00171	4.51832	0.997803	0.831072	66.9782	1.13468	496.44	154.422	19.4422	92.82	63.3256	0.0516264	0.545659	0.0146623	0.966875	0.633256	-55.7584	-0.329521	0.148788	12.63	39	0.199601	0
02-BUFFER	Illar	04054																			100	99.9613	78.1911	1.99325	72.2362	1	1.00162	4.59948	0.996627	0.722362	66.4017	1.12045	199.813	113.938	32.6455	93.48	41.5355	0.0207792	0.402606	0.0246195	0.97375	0.415355	-63.2578	-0.353638	0.133288	0.86	22	0.26738	0
02-BUFFER	Instinción	04055																			99.9577	99.9825	89.2091	1.98895	64.889	0.999577	1.00183	5.24759	0.994475	0.64889	77.8473	1.40294	1461.36	204.135	28.2308	77.6	100	0.151972	0.721324	0.0212902	0.808333	1	-45.9416	-0.29795	0.106367	21.57	28	0.232558	2.32558
01-SIZ	Láujar de Andarax	04057	Sierra Nevada NP	Láujar de Andarax	ES.IGN.SIGLIM.34010404057	4	34010404057	ES6	ES61	ES611	9273.54										99.9839	99.9832	80.3482	1.98162	89.2388	0.999839	1.00184	4.72636	0.990808	0.892388	72.2246	1.26417	7480.75	136.872	2401.45	85.16	100	0.777949	0.483647	1.81105	0.887083	1	-0.805386	-0.152794	0.123783	34.05	50	0.0652316	2.60926
01-SIZ	Nacimiento	04065	Sierra Nevada NP	Nacimiento	ES.IGN.SIGLIM.34010404065	4	34010404065	ES6	ES61	ES611	8069.53										100	99.9049	24.2348	1.99874	98.2578	1	1.00105	1.42557	0.999368	0.982578	8.17143	-0.316783	2643.32	170.486	36.7558	88.59	100	0.274888	0.602424	0.0277193	0.922813	1	-43.4431	-0.289915	0.0716531	37.05	-8	0.210526	4.21053
01-SIZ	Ohanes	04067	Sierra Nevada NP	Ohanes	ES.IGN.SIGLIM.34010404067	4	34010404067	ES6	ES61	ES611	3238.76										100	99.8652	100	1.99519	79.384	1	1.00065	5.88235	0.997594	0.79384	93.4888	1.78901	6430.1	91.7664	165.994	70.31	90.0178	0.668688	0.324263	0.125184	0.732396	0.900178	-44.9858	-0.294876	0.133176	21.29	23	0.159744	3.19489
02-BUFFER	Padules	04071																			100	99.8732	63.1665	1.9933	69.3108	1	1.00073	3.71568	0.996651	0.693108	48.1235	0.669305	2462.24	301.845	29.4326	62.11	79.8373	0.256057	1.06659	0.0221965	0.646979	0.798373	-44.1961	-0.292337	0.125794	25.15	0	0.229358	0
01-SIZ	Paterna del Río	04073	Sierra Nevada NP	Paterna del Río	ES.IGN.SIGLIM.34010404073	4	34010404073	ES6	ES61	ES611	4544.49										99.9996	99.881	84.7686	1.9942	66.9175	0.999996	1.00081	4.98639	0.997102	0.669175	73.0694	1.28502	6187.3	170.918	1545.91	75.78	73.387	0.643438	0.603951	1.16585	0.789375	0.73387	-21.2704	-0.218609	0.0876714	12.8	20	0.274725	2.74725
01-SIZ	Rágol	04077	Sierra Nevada NP	Rágol	ES.IGN.SIGLIM.34010404077	4	34010404077	ES6	ES61	ES611	2690.09										100	99.6837	92.0493	1.99829	59.8337	1	0.998835	5.41466	0.999143	0.598337	80.2196	1.4615	2469.34	150.654	41.0432	89.19	22.2135	0.256795	0.532348	0.0309526	0.929063	0.222135	-60.5741	-0.345008	0.104137	1.4	41	0.325733	0
02-BUFFER	Santa Cruz de Marchena	04080																			100	99.9918	64.9294	1.99804	62.5277	1	1.00192	3.81937	0.999019	0.625277	48.9118	0.688764	1537.12	100.361	43.3226	81.16	100	0.15985	0.354633	0.0326717	0.845417	1	-52.1486	-0.317911	0.0966854	22.3	10	0.444444	0
02-BUFFER	Santa Fe de Mondújar	04081																			100	99.9545	77.7778	1.99733	84.8417	1	1.00155	4.57517	0.998664	0.848417	68.4759	1.17164	524.757	71.53	35.7995	62.94	100	0.0545712	0.252756	0.0269981	0.655625	1	-60.201	-0.343808	0.103961	8.89	39	0.2331	2.331
02-BUFFER	Serón	04083																			99.973	99.9668	12.4116	1.98999	89.7086	0.99973	1.00167	0.730097	0.994995	0.897086	-7.52841	-0.704284	4832.19	66.798	55.2319	85.1	90.4886	0.502516	0.236035	0.041653	0.886458	0.904886	-48.569	-0.3064	0.107726	23.57	30	0.961538	1.92308
02-BUFFER	Tabernas	04088																			99.9392	99.9886	30.7509	1.98628	94.7875	0.999392	1.00189	1.80888	0.99314	0.947875	15.0235	-0.147662	1447.94	181.638	30.2271	64.79	83.5166	0.150576	0.641832	0.0227957	0.674896	0.835166	-53.4947	-0.32224	0.103931	10.06	53	0.543626	1.08725
02-BUFFER	Terque	04091																			100	99.9959	72.3171	1.98684	91.0785	1	1.00196	4.25395	0.993419	0.910785	63.2023	1.04148	1750.83	216.659	29.9108	76.28	76.1734	0.182074	0.76558	0.0225571	0.794583	0.761734	-49.4694	-0.309295	0.151229	0	27	0.259067	0
02-BUFFER	Vícar	04102																			99.7998	99.9386	7.72959	1.89003	81.565	0.997998	1.00139	0.454682	0.945016	0.81565	-15.7053	-0.906105	808.051	56.2863	18.2614	89.84	39.0202	0.0840319	0.198892	0.0137718	0.935833	0.390202	-67.5454	-0.367427	0.483024	7.5	84	0.159052	0.238578
01-SIZ	Las Tres Villas	04901	Sierra Nevada NP	Las Tres Villas	ES.IGN.SIGLIM.34010404901	4	34010404901	ES6	ES61	ES611	8528.73										100	99.947	29.9262	1.99789	97.3398	1	1.00147	1.76036	0.998947	0.973398	14.6836	-0.156051	4154.1	196.858	43.9063	72.65	100	0.431999	0.695612	0.0331119	0.756771	1	-41.6501	-0.284149	0.07929	21.23	12	0.501672	0
02-BUFFER	Navalperal de Pinares	05161																			99.9723	99.5099	39.9238	1.9603	100	0.999723	0.997093	2.34846	0.980152	1	26.5086	0.13581	2443.94	1962.9	232.165	92.65	100	0.254153	6.93606	0.175087	0.965104	1	86.608	0.128323	0.126242	59.28	37	0.122699	1.22699
02-BUFFER	Las Navas del Marqués	05168																			99.8493	99.9841	54.0852	1.94912	100	0.998493	1.00185	3.18148	0.974562	1	43.1277	0.546	4495.14	924.92	304.087	90.19	90.7402	0.467465	3.26827	0.229326	0.939479	0.907402	16.2388	-0.0979809	0.219085	46.36	59	0.385579	0.578369
02-BUFFER	Peguerinos	05184																			99.9643	99.9653	74.348	1.97826	100	0.999643	1.00166	4.37341	0.989129	1	67.2768	1.14205	7685.04	838.456	450.823	90.7	-279.091	0.799193	2.96274	0.339987	0.944792	-2.79091	-54.8839	-0.326708	0.053804	67.52	-19	0.357143	0
02-BUFFER	Santa María del Cubillo	05902																			99.8997	98.9076	35.633	1.95663	94.132	0.998997	0.991058	2.09606	0.978314	0.94132	20.1149	-0.021996	1270.08	1999.19	88.3895	92.41	75.8392	0.13208	7.06429	0.0666588	0.962604	0.758392	79.6805	0.106044	0.0649594	42.58	33	0.647249	0
02-BUFFER	Helechosa de los Montes	06062																			99.9953	99.9922	25.6809	1.99832	98.666	0.999953	1.00193	1.51064	0.999158	0.98666	9.96673	-0.272472	7038.27	124.573	4.26657	68.84	-25.3311	0.731934	0.440188	0.00321762	0.717083	-0.253311	-67.2178	-0.366373	0.043875	52.92	34	0.300752	1.50376
02-BUFFER	Villarta de los Montes	06157																			100	99.9517	0.163367	1.99907	96.4978	1	1.00152	0.0096098	0.999535	0.964978	-20.4871	-1.02413	5734.9	671.05	10.4823	71.26	100	0.596391	2.3712	0.0079052	0.742292	1	-5.64418	-0.168356	0.0600302	44.52	-35	0.210084	2.10084
02-BUFFER	Algaida	07004																			99.976	99.5922	7.44955	1.94398	95.2755	0.99976	0.997918	0.438209	0.97199	0.952755	-12.7874	-0.834085	3154.51	74.1456	1556.28	95.4	86.9509	0.328048	0.261999	1.17366	0.99375	0.869509	-27.4606	-0.238516	0.218845	6.79	52	0.0552486	0.368324
02-BUFFER	Banyalbufar	07007																			99.9474	99.9627	96.3508	1.97362	56.9211	0.999474	1.00163	5.6677	0.986808	0.569211	84.4964	1.56706	10034.9	223.225	400.483	87.5	21.8044	1.04356	0.788782	0.302023	0.911458	0.218044	-34.7226	-0.26187	0.157506	33.18	59	0.20202	0
02-BUFFER	Bunyola	07010																			99.9169	99.9722	67.7604	1.93292	58.178	0.999169	1.00173	3.9859	0.966459	0.58178	50.7007	0.732917	6950.55	164.202	943.389	93.11	43.8353	0.722811	0.58022	0.711455	0.969896	0.438353	-31.5453	-0.251652	0.245019	19.01	70	1.53707	0.301386
02-BUFFER	Calvià	07011																			99.7391	99.5613	22.1331	1.78044	69.9499	0.997391	0.997609	1.30195	0.890219	0.699499	-2.26669	-0.574415	5876.26	258.055	12996.5	84.38	48.3974	0.611092	0.911854	9.80125	0.878958	0.483974	153.742	0.344224	0.48763	42.99	82	0.0957952	0.0611459
02-BUFFER	Campos	07013																			99.9429	99.9978	9.45428	1.9664	100	0.999429	1.00198	0.556134	0.9832	1	-9.1851	-0.745174	1831.3	65.1809	1253.2	90.78	99.5035	0.190442	0.230321	0.945096	0.945625	0.995035	-33.8696	-0.259127	0.232384	32.05	53	0.201574	0.767902
02-BUFFER	Consell	07016																			99.9233	99.9927	0	1.90393	100	0.999233	1.00193	0	0.951964	1	-20.9375	-1.03524	36.8565	2.47391	875.533	88.11	100	0.00383283	0.00874174	0.660281	0.917813	1	-48.1866	-0.30517	0.428036	13.25	64	0.0252398	0.504796
02-BUFFER	Esporles	07020																			99.8918	99.9876	79.6319	1.93278	71.0652	0.998918	1.00188	4.68423	0.966389	0.710652	67.2413	1.14117	7447.08	161.709	392.149	92.02	70.3058	0.774446	0.571409	0.295738	0.958542	0.703058	-33.9361	-0.259341	0.324046	18.34	66	0.404694	0.607042
02-BUFFER	Felanitx	07022																			99.9145	99.9333	0.134366	1.95011	94.6178	0.999145	1.00134	0.00790386	0.975053	0.946178	-21.4077	-1.04685	2238.25	81.5007	1598.94	83.19	85.1365	0.232763	0.287988	1.20584	0.866563	0.851365	-31.1097	-0.250251	0.297362	32.35	57	0.132695	0.403854
02-BUFFER	Llucmajor	07031																			99.9543	99.9584	12.5148	1.94606	97.4525	0.999543	1.00159	0.736162	0.973028	0.974525	-6.30309	-0.674041	2999.77	116.847	894.521	87.23	10.4529	0.311956	0.412889	0.674601	0.908646	0.104529	-51.7476	-0.316622	0.314209	22.98	72	0.397038	0.253428
02-BUFFER	Marratxí	07036																			99.5923	99.8601	0	1.61319	98.501	0.995923	1.0006	0	0.806597	0.98501	-24.2373	-1.11669	1849.22	43.1686	656.759	92.39	72.6339	0.192307	0.152539	0.495294	0.962396	0.726339	-49.4225	-0.309145	0.525711	6.31	81	0.118187	0
01-SIZ	Palma de Mallorca	07040	Cabrera NP	Palma de Mallorca	ES.IGN.SIGLIM.34040707040	4	34040707040	ES5	ES53	ES532	20985.3										99.497	99.901	13.3046	1.57953	86.9444	0.99497	1.00101	0.782626	0.789763	0.869444	-11.2437	-0.795984	2318.01	67.3465	72467.2	88.51	21.6603	0.241058	0.237973	0.242203	0.921979	0.216603	-62.8037	-0.352178	0.465042	7.37	69	0.391398	0.447733
02-BUFFER	Puigpunyent	07045																			99.8317	99.9851	72.099	1.93245	73.4447	0.998317	1.00185	4.24112	0.966223	0.734447	58.8392	0.933789	8140.64	217.236	413.673	93.59	35.2822	0.846572	0.767618	0.31197	0.974896	0.352822	-34.9224	-0.262513	0.188948	22.64	59	0.10015	1.0015
02-BUFFER	Sencelles	07047																			99.9636	99.9989	0	1.91026	100	0.999636	1.00199	0	0.95513	1	-20.8648	-1.03345	1849.01	53.2208	1724.39	85.03	67.3061	0.192284	0.188059	1.30044	0.885729	0.673061	-35.2085	-0.263433	0.217658	13.43	52	0.0634115	0.634115
02-BUFFER	Santa Eugènia	07053																			99.9772	99.9901	12.0343	1.92826	89.948	0.999772	1.00191	0.707898	0.964129	0.89948	-8.53631	-0.729161	3991.25	114.759	1644.09	92.84	79.1683	0.415064	0.405509	1.23989	0.967083	0.791683	-23.6154	-0.22615	0.255579	22.3	57	0.0604961	1.20992
02-BUFFER	Santa María del Camí	07056																			99.9519	99.9843	28.2569	1.93725	87.0694	0.999519	1.00185	1.66217	0.968627	0.870694	10.0571	-0.270242	2794.09	86.4419	1012.64	93.61	98.9726	0.290567	0.305448	0.763683	0.975104	0.989726	-33.5094	-0.257969	0.357619	10.35	62	0.283206	0.991221
02-BUFFER	Santanyí	07057																			99.9147	99.9885	24.4776	1.91185	97.658	0.999147	1.00189	1.43986	0.955923	0.97658	7.46797	-0.334146	2209.73	84.6484	9968.29	83.92	70.5493	0.229797	0.299111	7.51757	0.874167	0.705493	92.5227	0.147344	0.284735	19.77	64	0.211491	0.352485
01-SIZ	Ses Salines	07059	Cabrera NP	Ses Salines	ES.IGN.SIGLIM.34040707059	4	34040707059	ES5	ES53	ES532	3933.01										99.9038	99.9964	38.1853	1.92801	100	0.999038	1.00197	2.24619	0.964003	1	24.2241	0.0794249	2685.98	77.2143	10996	75.03	64.4999	0.279324	0.272842	8.29262	0.781563	0.644999	105.427	0.188844	0.31334	44.94	60	0.0411523	0.205761
02-BUFFER	Valldemossa	07063																			99.967	99.9677	83.5902	1.9686	52.1645	0.99967	1.00168	4.91707	0.984298	0.521645	68.4873	1.17192	7894.95	194.728	1684.6	93.59	53.2042	0.821022	0.688085	1.27044	0.974896	0.532042	-14.2703	-0.196097	0.193223	36.09	58	0.0512821	1.02564
02-BUFFER	Aldeacentenera	10011																			99.9928	99.9912	3.90628	1.99441	99.0358	0.999928	1.00192	0.229781	0.997206	0.990358	-15.6162	-0.903906	2110.24	456.063	153.065	82.72	76.6974	0.219451	1.61153	0.115434	0.861667	0.766974	-28.4989	-0.241855	0.0716781	34.99	4	0.164204	1.64204
02-BUFFER	Almaraz	10019																			99.2617	99.5779	12.0641	1.83751	95.9728	0.992617	0.997775	0.709653	0.918753	0.959728	-8.42948	-0.726524	1862.8	504.561	58.3522	81.5	71.795	0.193719	1.7829	0.0440062	0.848958	0.71795	-28.2493	-0.241052	0.192463	9.13	63	1.21139	0.605694
02-BUFFER	Arroyomolinos de la Vera	10022																			100	98.5238	20.0213	1.99534	87.5848	1	0.987212	1.17772	0.99767	0.875848	0.769066	-0.499487	5176.5	80.8742	228.313	92.5	100	0.538321	0.285775	0.172182	0.963542	1	-40.8036	-0.281427	0.129928	30.73	11	0.221239	2.21239
02-BUFFER	Barrado	10025																			100	98.2	47.7715	1.99488	83.782	1	0.983968	2.81009	0.997438	0.83782	32.5863	0.28582	5342.28	57.8064	262.772	93.79	100	0.555562	0.204263	0.198169	0.976979	1	-41.3005	-0.283025	0.131032	34.39	23	0.235849	0
02-BUFFER	Belvís de Monroy	10026																			99.9465	99.8423	9.80916	1.95317	96.0037	0.999465	1.00042	0.577009	0.976585	0.960037	-9.72961	-0.758614	2661.72	194.972	66.9907	86.72	100	0.276801	0.688947	0.0505209	0.903333	1	-41.608	-0.284013	0.106903	44.21	44	0.268817	0
02-BUFFER	Berzocana	10029																			99.9896	99.93	37.8499	1.99746	98.4443	0.999896	1.0013	2.22646	0.998729	0.984443	24.2167	0.0792427	4761.94	270.85	62.2096	92.78	100	0.49521	0.957066	0.0469152	0.966458	1	-30.687	-0.248892	0.0540323	38.42	4	4.43459	0
02-BUFFER	Cabañas del Castillo	10033																			100	99.9967	41.5464	1.99833	87.0284	1	1.00197	2.4439	0.999164	0.870284	26.3065	0.130822	4599.84	145.587	111.544	89.93	100	0.478353	0.514442	0.0841207	0.936771	1	-39.7263	-0.277962	0.0601181	33.1	-25	0.894855	0
02-BUFFER	Cabezabellosa	10034																			100	98.0439	57.0898	1.99721	56.6389	1	0.982403	3.35822	0.998604	0.566389	38.1124	0.422213	2198.03	231.292	285.875	87.86	100	0.228581	0.817285	0.215592	0.915208	1	-36.4667	-0.267479	0.0971346	42.32	-16	0.276243	0
02-BUFFER	Campillo de Deleitosa	10042																			100	99.8536	1.2226	1.99559	96.4574	1	1.00054	0.0719178	0.997793	0.964574	-19.3036	-0.994917	7202.53	63.7688	108.745	65.52	100	0.749015	0.225332	0.0820095	0.6825	1	-45.2229	-0.295639	0.0452512	69.91	-92	1.47059	0
02-BUFFER	Cañaveral	10045																			99.8283	96.5062	13.2387	1.95896	98.6344	0.998283	0.966996	0.778748	0.97948	0.986344	-5.80298	-0.661697	2945.73	826.531	102.786	89.76	-31.3936	0.306336	2.92061	0.0775157	0.935	-0.313936	-21.4896	-0.219314	0.106104	35.75	28	0.095511	0.95511
02-BUFFER	Casas del Castañar	10054																			99.7345	99.4069	38.3936	1.94933	79.7739	0.997345	0.996061	2.25845	0.974665	0.797739	20.4851	-0.0128598	5381.07	141.219	293.629	97.5	100	0.559595	0.499007	0.22144	1.01562	1	-34.0867	-0.259825	0.143209	57.06	27	3.367	1.6835
01-SIZ	Casas de Millán	10056	Monfragüe NP	Casas de Millán	ES.IGN.SIGLIM.34111010056	4	34111010056	ES4	ES43	ES432	15308.3										99.9578	99.1387	27.3539	1.98795	94.0875	0.999578	0.993374	1.60906	0.993974	0.940875	10.7371	-0.253458	1509.16	811.962	138.93	73.23	71.5205	0.156942	2.86912	0.104773	0.762813	0.715205	-7.82287	-0.175362	0.0596877	43	16	0.165017	1.65017
01-SIZ	Casas de Miravete	10057	Monfragüe NP	Casas de Miravete	ES.IGN.SIGLIM.34111010057	4	34111010057	ES4	ES43	ES432	5018.67										99.9829	99.9607	100.094	1.98521	100	0.999829	1.00161	5.88791	0.992607	1	97.6391	1.89144	9288.52	90.3085	665.05	57.89	19.1054	0.965944	0.319111	0.501546	0.603021	0.191054	-48.3865	-0.305813	0.0530948	9.97	-17	0.675676	0
01-SIZ	Casatejada	10058	Monfragüe NP	Casatejada	ES.IGN.SIGLIM.34111010058	4	34111010058	ES4	ES43	ES432	11187.8										99.8726	99.0091	8.24324	1.97106	100	0.998726	0.992075	0.484896	0.985529	1	-10.7755	-0.784427	1764.73	121.991	27.3577	61.95	100	0.18352	0.431064	0.0206317	0.645313	1	-54.3894	-0.325118	0.10306	55.94	50	0.0709723	0.709723
02-BUFFER	Collado de la Vera	10065																			99.9502	96.6461	5.47289	1.99186	91.3494	0.999502	0.968398	0.321935	0.995928	0.913494	-16.0149	-0.913745	5002.41	230.89	137.901	61.9	100	0.520218	0.815867	0.103997	0.644792	1	-38.3025	-0.273383	0.0538134	61.02	67	0.985222	0
02-BUFFER	Cuacos de Yuste	10068																			99.9882	98.2473	13.7359	1.986	92.5878	0.999882	0.984442	0.807996	0.992998	0.925878	-5.77605	-0.661033	5266.45	201.481	181.029	93.02	100	0.547676	0.711947	0.136522	0.968958	1	-32.6979	-0.255359	0.117735	32.8	35	0.117647	1.17647
01-SIZ	Deleitosa	10070	Monfragüe NP	Deleitosa	ES.IGN.SIGLIM.34111010070	4	34111010070	ES4	ES43	ES432	14427.9										99.9979	99.9917	10.3181	1.9954	93.2506	0.999979	1.00192	0.606944	0.997702	0.932506	-9.21896	-0.74601	4721.32	198.886	137.115	90.81	100	0.490986	0.702779	0.103405	0.945937	1	-35.1379	-0.263206	0.0675028	45.27	4	0.13369	1.3369
02-BUFFER	Fresnedoso de Ibor	10075																			99.975	99.2746	7.08568	1.99229	96.9386	0.99975	0.994735	0.416805	0.996144	0.969386	-12.4636	-0.826093	2906.12	79.4575	108.661	60.53	79.3092	0.302217	0.280769	0.0819468	0.630521	0.793092	-58.2291	-0.337466	0.0682768	0	-56	0.367647	3.67647
02-BUFFER	Galisteo	10076																			99.7596	98.6545	3.98229	1.94176	100	0.997596	0.988522	0.234252	0.970878	1	-16.1751	-0.917699	1520.55	446.522	42.2956	73.04	95.7667	0.158127	1.57782	0.0318971	0.760833	0.957667	-30.2732	-0.247561	0.11138	20.82	57	0.203046	2.03046
02-BUFFER	Gargüera	10081																			100	99.0278	5.76345	1.99864	100	1	0.992263	0.339027	0.999318	1	-13.3878	-0.848906	2920.24	910.384	145.716	83.67	100	0.303686	3.21691	0.109891	0.871563	1	10.0409	-0.117913	0.0431649	52.21	-61	0.75188	0
02-BUFFER	Garrovillas de Alconétar	10082																			99.9732	99.9378	24.5408	1.99461	100	0.999732	1.00138	1.44358	0.997307	1	8.83993	-0.300284	1236.92	2037.87	117.941	84.02	100	0.128632	7.20094	0.0889449	0.875208	1	85.8744	0.125964	0.0947775	38.92	28	0.0475737	1.42721
01-SIZ	Higuera	10097	Monfragüe NP	Higuera	ES.IGN.SIGLIM.34111010097	4	34111010097	ES4	ES43	ES432	4055.49										100	99.8469	48.3425	1.99279	90.8083	1	1.00047	2.84368	0.996395	0.908083	34.9725	0.344716	7602.37	223.186	107.897	87.1	100	0.790596	0.788644	0.0813701	0.907292	1	-28.6419	-0.242315	0.0466792	57.76	-34	1.0101	0
02-BUFFER	Hinojal	10098																			99.9521	99.9705	45.3074	1.9879	100	0.999521	1.00171	2.66514	0.99395	1	33.2064	0.301125	475.969	3469.58	160.265	77.78	100	0.0494976	12.26	0.120863	0.810208	1	184.812	0.444141	0.0749107	63.21	1	0.2457	0
02-BUFFER	Holguera	10099																			99.9902	95.3264	0	1.99095	100	0.999902	0.955174	0	0.995473	1	-20.989	-1.03652	918.577	257.972	34.2629	77.82	100	0.0955259	0.91156	0.0258393	0.810625	1	-43.129	-0.288905	0.127452	7.58	40	0.151745	1.51745
01-SIZ	Jaraicejo	10103	Monfragüe NP	Jaraicejo	ES.IGN.SIGLIM.34111010103	4	34111010103	ES4	ES43	ES432	17759.5										99.9825	99.815	82.4531	1.9889	98.9327	0.999825	1.00015	4.85018	0.994448	0.989327	76.6786	1.3741	2970.58	797.828	357.839	65.18	83.3515	0.30892	2.81918	0.269863	0.678958	0.833515	-1.79129	-0.155965	0.0500929	53.83	17	0.201207	0
02-BUFFER	Jaraíz de la Vera	10104																			99.9603	97.4079	6.76126	1.96803	84.3893	0.999603	0.976031	0.397721	0.984013	0.843893	-15.9748	-0.912755	4545.27	91.6026	153.453	87.27	83.0028	0.472678	0.323684	0.115727	0.909062	0.830028	-46.9764	-0.301278	0.290886	14.39	60	0.307031	0.921093
02-BUFFER	Jarandilla de la Vera	10105																			99.9425	99.397	4.76443	1.97693	95.6282	0.999425	0.995962	0.280261	0.988467	0.956282	-15.5921	-0.90331	7650.06	276.62	192.056	93.78	86.911	0.795556	0.977454	0.144838	0.976875	0.86911	-24.7233	-0.229713	0.201542	48.98	47	0.0346861	1.04058
02-BUFFER	Majadas	10114																			99.6994	98.3982	25.2257	1.95416	100	0.996994	0.985954	1.48387	0.977082	1	8.87795	-0.299345	4775.28	167.269	25.5305	91.74	100	0.496597	0.591056	0.0192538	0.955625	1	-38.7494	-0.27482	0.145097	5.05	68	0.0747384	0.747384
01-SIZ	Malpartida de Plasencia	10116	Monfragüe NP	Malpartida de Plasencia	ES.IGN.SIGLIM.34111010116	4	34111010116	ES4	ES43	ES432	37296.9										99.9523	99.5876	45.8007	1.98979	99.9746	0.999523	0.997872	2.69416	0.994896	0.999746	33.7239	0.313897	2530.56	951.721	79.2732	88.79	99.7124	0.263161	3.36297	0.0597837	0.924896	0.997124	12.1588	-0.111102	0.104335	18.42	59	0.0216967	0.867867
02-BUFFER	Mesas de Ibor	10120																			100	99.9156	16.3325	1.99743	100	1	1.00116	0.960738	0.998717	1	-0.787747	-0.537912	1632.03	115.129	96.2258	74.29	100	0.16972	0.406815	0.0725684	0.773854	1	-51.5408	-0.315957	0.0541753	61.57	-44	0.574713	0
02-BUFFER	Millanes	10122																			99.9828	99.8162	0	1.96949	100	0.999828	1.00016	0	0.984743	1	-20.3053	-1.01964	1638.72	29.1745	59.5217	71.05	48.8943	0.170416	0.10309	0.0448881	0.740104	0.488943	-69.0512	-0.372269	0.108144	41.87	13	0.414938	0
01-SIZ	Mirabel	10123	Monfragüe NP	Mirabel	ES.IGN.SIGLIM.34111010123	4	34111010123	ES4	ES43	ES432	4935.25										99.9453	99.9685	48.4915	1.98685	91.2422	0.999453	1.00169	2.85244	0.993426	0.912422	35.1886	0.35005	4807.92	1413.23	55.0966	74.22	100	0.499991	4.99376	0.041551	0.773125	1	46.1686	-0.00172832	0.106923	48.19	23	0.149477	1.49477
02-BUFFER	Monroy	10125																			99.9955	99.9856	2.58195	1.99731	99.9801	0.999955	1.00186	0.15188	0.998655	0.999801	-16.957	-0.936999	2050.66	121.693	113.707	87.56	100	0.213255	0.430012	0.0857519	0.912083	1	-47.178	-0.301926	0.0655918	40.07	39	0.100908	0
02-BUFFER	Navalmoral de la Mata	10131																			99.9294	97.1334	1.03633	1.95707	100	0.999294	0.97328	0.0609604	0.978535	1	-19.7586	-1.00615	1807.08	447.142	29.5602	84.93	93.3993	0.187924	1.58001	0.0222928	0.884688	0.933993	-27.8219	-0.239678	0.303888	8.63	72	0.693762	0.809389
02-BUFFER	Pasarón de la Vera	10138																			100	97.7351	8.62644	1.9947	89.3746	1	0.979309	0.507437	0.997349	0.893746	-12.4432	-0.825589	4252.19	363.552	192.203	82.14	100	0.4422	1.28464	0.144949	0.855625	1	-25.4518	-0.232056	0.116997	27.79	24	0.153139	0
02-BUFFER	Pedroso de Acim	10139																			99.9327	95.8561	35.8186	1.98834	100	0.999327	0.960482	2.10698	0.994168	1	21.2191	0.00525716	4116.6	417.076	38.5943	81.82	100	0.428099	1.47377	0.0291058	0.852292	1	-24.3347	-0.228463	0.0525114	54.31	-38	1.05263	0
02-BUFFER	Plasencia	10148																			99.8688	99.5121	11.0496	1.94593	93.5787	0.998688	0.997115	0.649978	0.972963	0.935787	-8.90936	-0.738369	1909.79	1156.45	101.136	84.1	2.36091	0.198605	4.08638	0.0762714	0.876042	0.0236091	5.21812	-0.133423	0.397923	11.76	67	0.896928	0.792864
02-BUFFER	Portezuelo	10151																			99.9874	99.9608	37.5763	1.99745	100	0.999874	1.00161	2.21037	0.998725	1	24.2115	0.0791159	1949.63	888.95	99.4815	50.54	100	0.202749	3.14117	0.0750238	0.526458	1	-1.09206	-0.153716	0.0401343	51.97	6	0.4329	4.329
02-BUFFER	Riolobos	10155																			99.9864	99.0482	2.83764	1.99177	97.5023	0.999864	0.992467	0.16692	0.995884	0.975023	-17.3969	-0.947855	1404.02	181.264	39.0434	71.31	100	0.146009	0.640509	0.0294445	0.742812	1	-48.8245	-0.307221	0.148694	8.07	52	0.0789889	0.789889
02-BUFFER	Robledollano	10159																			99.9756	98.8281	29.3335	1.99437	63.0178	0.999756	0.990261	1.7255	0.997183	0.630178	6.85759	-0.349211	4578.12	161.12	108.735	93.71	100	0.476094	0.56933	0.0820024	0.976146	1	-37.9285	-0.272181	0.0685897	4.83	7	0.306748	0
01-SIZ	Romangordo	10160	Monfragüe NP	Romangordo	ES.IGN.SIGLIM.34111010160	4	34111010160	ES4	ES43	ES432	3908.64										99.9883	99.229	23.4335	1.9396	100	0.999883	0.994278	1.37844	0.969799	1	6.84807	-0.349446	4804.56	163.612	89.8016	91.67	100	0.499642	0.578135	0.0677237	0.954896	1	-37.9921	-0.272385	0.0728204	46.94	-53	0.401606	0
02-BUFFER	Santiago del Campo	10170																			99.9857	99.8557	33.0239	1.9952	100	0.999857	1.00056	1.94258	0.9976	1	18.8119	-0.0541562	644.131	955.596	159.54	86.6	100	0.0669854	3.37667	0.120317	0.902083	1	9.32103	-0.120228	0.0567804	51.47	-11	0.363636	0
01-SIZ	Saucedilla	10173	Monfragüe NP	Saucedilla	ES.IGN.SIGLIM.34111010173	4	34111010173	ES4	ES43	ES432	6044.44										99.9227	95.0893	16.6424	1.97185	100	0.999227	0.952799	0.978967	0.985925	1	-1.66165	-0.559482	401.74	201.242	28.6018	72.61	100	0.0417783	0.711101	0.02157	0.756354	1	-49.3839	-0.30902	0.1075	0	61	0.112867	1.12867
01-SIZ	Serradilla	10175	Monfragüe NP	Serradilla	ES.IGN.SIGLIM.34111010175	4	34111010175	ES4	ES43	ES432	25942.8										99.9968	99.8266	99.8216	1.99783	90.3261	0.999968	1.00027	5.87186	0.998917	0.903261	95.4854	1.83829	4876.99	401.841	439.857	68.88	99.7098	0.507175	1.41993	0.331718	0.7175	0.997098	-20.5315	-0.216233	0.0731844	49.89	31	1.24378	1.24378
01-SIZ	Serrejón	10176	Monfragüe NP	Serrejón	ES.IGN.SIGLIM.34111010176	4	34111010176	ES4	ES43	ES432	12423.1										100	99.9639	91.4832	1.99793	99.0912	1	1.00164	5.38137	0.998965	0.990912	87.4577	1.64015	4221.96	393.459	563.051	75.49	100	0.439056	1.39031	0.424624	0.786354	1	-19.193	-0.211928	0.0538282	0.36	40	0.230947	0
02-BUFFER	Talaván	10178																			99.9914	99.8998	36.6373	1.99583	100	0.999914	1.001	2.15513	0.997917	1	23.0793	0.0511688	906.649	1542.63	138.708	85.57	98.3979	0.0942854	5.45098	0.104606	0.891354	0.983979	50.504	0.0122142	0.0866711	41.97	7	2.3753	2.3753
02-BUFFER	Talayuela	10180																			99.9213	99.3943	19.4752	1.97059	100	0.999213	0.995935	1.1456	0.985294	1	2.52081	-0.456251	2433.65	665.775	23.92	86.59	60.0387	0.253083	2.35256	0.0180393	0.901979	0.600387	-17.479	-0.206416	0.206531	5.47	81	0.327065	0.545108
02-BUFFER	Tejeda de Tiétar	10181																			99.8773	99.2314	6.21006	1.97653	100	0.998773	0.994302	0.365298	0.988267	1	-13.0672	-0.840992	2680.94	648.919	64.2543	97.95	100	0.2788	2.293	0.0484572	1.02031	1	-7.18864	-0.173322	0.115233	14.44	44	0.249377	1.24688
01-SIZ	Toril	10182	Monfragüe NP	Toril	ES.IGN.SIGLIM.34111010182	4	34111010182	ES4	ES43	ES432	14986										99.9418	99.9341	68.3973	1.9904	100	0.999418	1.00134	4.02337	0.995202	1	60.3866	0.971983	2501.94	191.973	324.646	65.74	100	0.260186	0.678348	0.244831	0.684792	1	-42.6369	-0.287322	0.0305598	0.78	83	0.588235	0
02-BUFFER	El Torno	10184																			99.981	98.7683	32.4059	1.98966	77.6254	0.99981	0.989663	1.90623	0.994832	0.776254	13.3357	-0.18932	3695.59	344.104	295.004	96.45	100	0.384316	1.21592	0.222477	1.00469	1	-23.4521	-0.225625	0.184485	29.6	22	0.111483	2.22965
02-BUFFER	Torrecillas de la Tiesa	10186																			99.9886	99.7019	5.57892	1.98873	100	0.999886	0.999017	0.328172	0.994364	1	-13.5712	-0.853432	1498.88	831.291	160.147	75.58	99.9953	0.155874	2.93742	0.120775	0.787292	0.999953	0.026313	-0.15012	0.0836475	37.5	37	0.0906618	0.906618
01-SIZ	Torrejón el Rubio	10190	Monfragüe NP	Torrejón el Rubio	ES.IGN.SIGLIM.34111010190	4	34111010190	ES4	ES43	ES432	22205.9										99.9929	99.8898	99.9739	1.99802	98.0392	0.999929	1.0009	5.88082	0.999009	0.980392	97.2209	1.88112	2999.81	166.222	360.035	78.31	92.6464	0.31196	0.587358	0.27152	0.815729	0.926464	-41.7394	-0.284436	0.0466904	33.33	33	0.168634	1.68634
02-BUFFER	Trujillo	10195																			99.9481	99.6581	18.5114	1.98253	100	0.999481	0.998578	1.08891	0.991263	1	1.5646	-0.479852	1237.66	2390.15	151.114	87.71	73.3329	0.128708	8.44577	0.113962	0.913646	0.733329	106.708	0.192964	0.115594	15.22	53	0.237222	0.754798
02-BUFFER	Valdecañas de Tajo	10197																			100	99.7342	23.9417	1.99178	99.9614	1	0.99934	1.40834	0.995892	0.999614	8.06365	-0.319444	3944.82	72.8582	108.077	76.47	-109.327	0.410235	0.257449	0.0815062	0.796562	-1.09327	-90.9503	-0.442696	0.0711701	50.44	48	0.813008	0
02-BUFFER	Valdehúncar	10199																			99.9616	99.9732	6.83359	1.98511	100	0.999616	1.00174	0.401976	0.992557	1	-12.0823	-0.816682	1232.49	47.8157	39.0539	91.55	94.2872	0.128171	0.16896	0.0294524	0.953646	0.942872	-55.538	-0.328812	0.0794028	26.15	-11	0.558659	0
02-BUFFER	Chipiona	11016																			99.1363	99.7542	0	1.70605	100	0.991363	0.999541	0	0.853027	1	-23.1214	-1.08915	61.0771	5.87954	231338	69.3	-133.645	0.00635161	0.0207758	0.773187	0.721875	-1.33645	-96.2851	-0.459852	0.512278	61.76	75	0.109925	0.680486
02-BUFFER	Sanlúcar de Barrameda	11032																			99.4705	99.8818	22.498	1.8714	100	0.994705	1.00082	1.32341	0.9357	1	5.09273	-0.392771	112.685	7.48281	69082.8	68.35	8.56285	0.0117185	0.026441	0.230892	0.711979	0.0856285	-78.6668	-0.403193	0.519144	15.65	75	0.211413	0.561798
02-BUFFER	Trebujena	11037																			99.9708	100	2.54466	1.98109	93.384	0.999708	1.002	0.149686	0.990546	0.93384	-18.4843	-0.974696	0	0	2039.42	63.81	-39.8081	0	0	1.53803	0.664687	-0.398081	-63.9073	-0.355727	0.284728	5.27	68	0.282925	1.1317
01-SIZ	Alcoba	13006	Cabañeros NP	Alcoba	ES.IGN.SIGLIM.34081313006	4	34081313006	ES4	ES42	ES422	30695.9										99.999	99.8251	54.2532	1.99762	98.1833	0.99999	1.00025	3.19136	0.99881	0.981833	43.4449	0.553831	2887.11	8.5404	78.7245	88.56	29.6111	0.30024	0.0301781	0.0593699	0.9225	0.296111	-67.832	-0.368349	0.0440601	28.8	16	3.27869	1.63934
02-BUFFER	Almagro	13013																			99.8794	99.793	4.8158	1.96775	98.9522	0.998794	0.99993	0.283282	0.983874	0.989522	-14.8919	-0.88603	573.807	40.3185	394.461	87.99	50.8438	0.0596721	0.142468	0.297482	0.916562	0.508438	-61.5075	-0.348009	0.178031	6.98	62	0.222643	1.00189
02-BUFFER	Anchuras	13017																			99.9939	99.6433	11.3569	1.99786	87.7229	0.999939	0.99843	0.668054	0.998932	0.877229	-9.14831	-0.744266	4689.6	73.1454	15.6667	90.98	100	0.487687	0.258464	0.011815	0.947708	1	-45.8865	-0.297773	0.0344695	44.1	2	1.23839	0
02-BUFFER	Arenas de San Juan	13018																			99.9188	92.795	0	1.98052	100	0.999188	0.92981	0	0.990262	1	-21.6148	-1.05196	64.3245	1.42399	721.154	77.99	99.9429	0.00668932	0.00503178	0.543857	0.812396	0.999429	-52.6519	-0.31953	0.118819	10.23	48	0.0951475	0.951475
02-BUFFER	Bolaños de Calatrava	13023																			99.7567	99.5419	0	1.93702	99.5237	0.997567	0.997414	0	0.968512	0.995237	-20.8254	-1.03248	459.013	8.10251	464.42	89.03	51.0633	0.0477343	0.0286308	0.350241	0.927396	0.510633	-62.7073	-0.351868	0.331104	9.37	64	0.168322	0.757448
02-BUFFER	Carrión de Calatrava	13031																			99.9898	98.5251	0	1.98107	100	0.999898	0.987225	0	0.990536	1	-20.4468	-1.02313	246.377	8.14326	656.001	86.61	91.1912	0.0256216	0.0287748	0.494722	0.902188	0.911912	-52.7356	-0.319799	0.160807	22.49	58	0.651678	0.977517
02-BUFFER	Los Cortijos	13036																			99.9711	99.9875	0.65213	1.98918	84.6296	0.999711	1.00188	0.0383606	0.994589	0.846296	-22.3833	-1.07093	3106.69	45.2254	270.051	89.32	100	0.323075	0.159807	0.203658	0.930417	1	-47.6609	-0.303479	0.0913271	39.51	14	0.110619	0
01-SIZ	Daimiel	13039	Tablas de Daimiel NP	Daimiel	ES.IGN.SIGLIM.34081313039	4	34081313039	ES4	ES42	ES422	43797.8										99.9508	37.0264	4.31164	1.97514	100	0.999508	0.371006	0.253626	0.987572	1	-27.7658	-1.20378	49.8103	2.85659	961.958	86.98	30.6998	0.00517994	0.010094	0.725458	0.906042	0.306998	-60.9246	-0.346135	0.0427946	7.9	55	0.22007	0.660211
02-BUFFER	Fernán Caballero	13040																			99.9769	99.9106	13.7681	1.99102	99.8743	0.999769	1.00111	0.809889	0.995508	0.998743	-3.89966	-0.61472	1443.45	16.5175	191.987	80.76	100	0.15011	0.0583657	0.144786	0.84125	1	-56.1098	-0.33065	0.093585	40.76	28	0.097371	1.94742
02-BUFFER	Fontanarejo	13041																			99.9903	99.7759	0.137983	1.99568	92.3309	0.999903	0.999758	0.00811662	0.99784	0.923309	-21.4215	-1.04719	3684.02	42.603	33.8044	59.52	86.0433	0.383114	0.150541	0.0254936	0.62	0.860433	-59.2084	-0.340615	0.056974	23.81	-26	0.377358	0
02-BUFFER	Fuente el Fresno	13044																			99.974	99.5914	0.1758	1.9805	89.1814	0.99974	0.997909	0.0103412	0.990252	0.891814	-22.1989	-1.06638	2004.3	31.3722	215.221	88.71	99.5111	0.208434	0.110856	0.162308	0.924063	0.995111	-51.9846	-0.317384	0.157655	20.5	47	0.0906071	0.604047
02-BUFFER	Herencia	13047																			99.9742	99.586	1.86274	1.97412	98.7332	0.999742	0.997856	0.109573	0.987058	0.987332	-18.3688	-0.971844	738.379	15.5712	452.261	89.4	94.218	0.0767865	0.0550219	0.341071	0.93125	0.94218	-53.0738	-0.320887	0.184641	17.83	53	0.23722	0.948879
01-SIZ	Horcajo de los Montes	13049	Cabañeros NP	Horcajo de los Montes	ES.IGN.SIGLIM.34081313049	4	34081313049	ES4	ES42	ES422	20836.9										99.9968	99.9854	34.6451	1.99701	90.1549	0.999968	1.00186	2.03795	0.998503	0.901549	18.7965	-0.0545372	4831.66	45.1849	53.3675	83.33	100	0.502461	0.159664	0.040247	0.868021	1	-48.5922	-0.306474	0.0633501	17.77	30	0.106952	2.13904
02-BUFFER	Las Labores	13050																			99.8402	99.2344	0	1.96835	100	0.998402	0.994332	0	0.984173	1	-20.4619	-1.02351	328.083	1.55288	576.598	79.9	100	0.0341184	0.0054872	0.43484	0.832292	1	-53.8652	-0.323432	0.124077	24.8	37	0.172414	0
02-BUFFER	Malagón	13052																			99.9213	99.8502	1.31534	1.97791	82.0779	0.999213	1.0005	0.0773731	0.988956	0.820779	-22.2635	-1.06797	1189.83	24.3114	264.057	90.02	46.263	0.123734	0.085906	0.199138	0.937708	0.46263	-63.8177	-0.355439	0.1444	25.65	39	0.296004	0.616675
02-BUFFER	Manzanares	13053																			99.9552	99.9898	0	1.96499	99.8324	0.999552	1.0019	0	0.982493	0.998324	-20.3546	-1.02086	97.9109	8.03889	777.194	88.07	64.4269	0.0101821	0.028406	0.586119	0.917396	0.644269	-56.2726	-0.331174	0.193538	6.75	62	0.768977	0.933758
02-BUFFER	Miguelturra	13056																			99.9659	99.8798	12.5164	1.9489	100	0.999659	1.0008	0.736261	0.974451	1	-5.77659	-0.661046	1346.79	50.7367	276.151	87.34	88.585	0.140058	0.179282	0.208259	0.909792	0.88585	-53.5352	-0.322371	0.317949	8.67	73	0.131363	0.853859
02-BUFFER	Moral de Calatrava	13058																			99.9771	99.1803	0.627224	1.98883	96.9674	0.999771	0.99379	0.0368955	0.994415	0.969674	-20.1091	-1.0148	730.594	21.0353	179.112	90.2	100	0.0759769	0.0743295	0.135077	0.939583	1	-55.5007	-0.328692	0.158934	25.46	41	0.376719	0.941797
02-BUFFER	Navalpino	13059																			99.9934	99.9434	9.7254	1.99797	85.0986	0.999934	1.00144	0.572082	0.998985	0.850986	-11.5315	-0.803088	5306.93	47.7521	62.8626	76.39	29.5005	0.551885	0.168735	0.0474077	0.795729	0.295005	-62.8247	-0.352245	0.0323176	37.12	-27	0.4329	0
01-SIZ	Navas de Estena	13060	Cabañeros NP	Navas de Estena	ES.IGN.SIGLIM.34081313060	4	34081313060	ES4	ES42	ES422	14648.5										99.9937	99.6868	73.9708	1.99741	100	0.999937	0.998866	4.35122	0.998704	1	66.9746	1.13459	7855.54	26.0418	103.71	84.68	100	0.816923	0.0920205	0.078213	0.882083	1	-42.6152	-0.287253	0.04174	30.4	-4	0.406504	0
02-BUFFER	Piedrabuena	13063																			99.993	99.8356	7.61905	1.99461	91.6095	0.99993	1.00036	0.44818	0.997304	0.916095	-12.7627	-0.833476	3619.1	39.3398	37.1381	89.55	100	0.376362	0.13901	0.0280076	0.932812	1	-50.4762	-0.312533	0.0855038	32.8	45	0.442772	0.885544
02-BUFFER	Porzuna	13065																			99.9738	99.9743	2.86805	1.98537	91.2619	0.999738	1.00175	0.168709	0.992683	0.912619	-18.4901	-0.974839	646.826	16.532	104.436	89.37	88.5549	0.0672656	0.0584169	0.0787601	0.930938	0.885549	-59.5814	-0.341815	0.125356	24.91	39	0.60556	1.10102
02-BUFFER	Pozuelo de Calatrava	13066																			99.9397	99.8147	18.8473	1.98107	100	0.999397	1.00015	1.10866	0.990534	1	1.97485	-0.469726	378.203	19.885	199.467	91.07	80.5616	0.0393306	0.070265	0.150428	0.948646	0.805616	-59.7143	-0.342242	0.16551	11.2	63	0.0295683	0.887049
02-BUFFER	Puerto Lápice	13070																			99.7192	99.6768	0.0092714	1.92873	100	0.997192	0.998766	0.000545377	0.964366	1	-20.7826	-1.03142	1073.53	22.9361	309.579	85.39	100	0.11164	0.0810462	0.233468	0.889479	1	-53.6873	-0.32286	0.122422	30.49	38	0.105597	0
01-SIZ	Retuerta del Bullaque	13072	Cabañeros NP	Retuerta del Bullaque	ES.IGN.SIGLIM.34081313072	4	34081313072	ES4	ES42	ES422	65356.4										99.9934	99.9662	43.4618	1.9981	96.8407	0.999934	1.00167	2.55658	0.999051	0.968407	30.5127	0.234639	3729.71	82.9721	154.263	88.86	100	0.387865	0.293188	0.116337	0.925625	1	-45.5397	-0.296658	0.0369774	41.04	38	2.11907	1.00908
01-SIZ	Torralba de Calatrava	13083	Tablas de Daimiel NP	Torralba de Calatrava	ES.IGN.SIGLIM.34081313083	4	34081313083	ES4	ES42	ES422	10151.3										99.9541	99.8936	0	1.96412	100	0.999541	1.00094	0	0.98206	1	-20.3492	-1.02073	91.6018	1.01508	834.704	88.82	-13.686	0.00952598	0.00358684	0.62949	0.925208	-0.13686	-71.381	-0.379762	0.159798	29.71	34	0.0332668	0.998004
01-SIZ	Villarrubia de los Ojos	13096	Tablas de Daimiel NP	Villarrubia de los Ojos	ES.IGN.SIGLIM.34081313096	4	34081313096	ES4	ES42	ES422	28164.8										99.9957	99.7233	31.2431	1.98902	100	0.999957	0.999231	1.83783	0.994508	1	16.6305	-0.107999	1757.72	20.1952	340.111	85.81	55.7801	0.182791	0.0713611	0.256494	0.893854	0.557801	-60.754	-0.345586	0.183638	9.61	55	0.199481	0.598444
02-BUFFER	Villarta de San Juan	13097																			99.9007	95.959	0	1.94315	100	0.999007	0.961513	0	0.971577	1	-21.358	-1.04562	171.578	32.6292	734.147	92.78	86.3671	0.0178429	0.115298	0.553656	0.966458	0.863671	-49.6615	-0.309913	0.194175	6.68	56	0.698568	0.698568
02-BUFFER	El Robledo	13901																			99.9962	99.9728	2.33439	1.99222	97.2341	0.999962	1.00173	0.137317	0.996111	0.972341	-17.8508	-0.959058	614.559	12.6163	66.0285	94.68	79.2262	0.06391	0.0445807	0.0497952	0.98625	0.792262	-61.264	-0.347226	0.0976669	45.02	39	0.090009	1.80018
02-BUFFER	Boiro	15011																			99.7264	96.2744	0	1.9329	92.5343	0.997264	0.964673	0	0.966452	0.925343	-22.9254	-1.08431	33483.3	95.7771	56325.9	87.06	74.5309	3.48204	0.338435	0.188255	0.906875	0.745309	13.2182	-0.107695	0.40426	7.66	62	0.211808	0.105904
02-BUFFER	A Pobra do Caramiñal	15067																			99.6622	98.6321	1.12032	1.82441	95.889	0.996622	0.988297	0.0659013	0.912204	0.95889	-21.5617	-1.05065	32078.7	109.92	72233	87.01	78.8186	3.33597	0.388408	0.241421	0.906354	0.788186	13.2068	-0.107732	0.442473	14.12	56	0.211864	0.529661
02-BUFFER	Porto do Son	15071																			99.7782	96.7586	5.59918	1.96004	97.5696	0.997782	0.969525	0.329363	0.98002	0.975696	-14.9523	-0.887519	25352.2	133.953	59329.6	90.87	77.5691	2.63646	0.473332	0.198294	0.946563	0.775691	0.606815	-0.148253	0.28606	22.51	54	0.442239	0.32359
02-BUFFER	Rianxo	15072																			99.5946	95.9625	0.380457	1.92685	92.5717	0.995946	0.961548	0.0223798	0.963423	0.925717	-22.6197	-1.07677	39937.7	135.797	55678.4	84.51	95.0327	4.15326	0.479847	0.186091	0.880313	0.950327	32.9967	-0.0440883	0.383663	3.88	53	0.187701	0.0893815
01-SIZ	Ribeira	15073	Islas Atlánticas de Galicia NP	Ribeira	ES.IGN.SIGLIM.34121515073	4	34121515073	ES1	ES11	ES111	6833.37										99.7243	96.8159	19.4866	1.88366	95.4613	0.997243	0.970099	1.14627	0.941829	0.954613	0.201134	-0.513505	20379.7	46.2165	135842	90.31	76.7737	2.11935	0.163309	0.454017	0.940729	0.767737	-11.0971	-0.185892	0.492436	19.91	62	0.662764	0
02-BUFFER	Albuñán	18005																			100	99.5248	0	1.97346	100	1	0.997243	0	0.986728	1	-20.3206	-1.02002	145.249	4.65212	4254.96	60.67	100	0.0151049	0.0164386	3.20887	0.631979	1	-2.55224	-0.158412	0.200671	25.07	35	0.239234	0
02-BUFFER	Albuñuelas	18007																			100	99.9942	0.18448	1.99952	68.4147	1	1.00195	0.0108517	0.999759	0.684147	-26.0659	-1.16182	3341.57	77.1695	209.176	36.12	100	0.347501	0.272684	0.15775	0.37625	1	-56.9163	-0.333244	0.0743213	12.48	31	0.119617	3.58852
01-SIZ	Aldeire	18010	Sierra Nevada NP	Aldeire	ES.IGN.SIGLIM.34011818010	4	34011818010	ES6	ES61	ES614	7001.51										99.4149	99.9997	59.7563	1.89761	79.3148	0.994149	1.002	3.51508	0.948807	0.793148	45.0636	0.593784	3478.48	51.5778	1746.37	58.87	44.7211	0.361739	0.182254	1.31702	0.613229	0.447211	-41.571	-0.283894	0.087881	47.33	18	0.15748	0
02-BUFFER	Alhendín	18014																			99.1196	99.758	0	1.78913	39.7927	0.991196	0.999579	0	0.894564	0.397927	-34.3347	-1.36591	609.277	38.2384	973.113	84.99	-5.6235	0.0633607	0.135118	0.733871	0.885312	-0.056235	-64.7714	-0.358506	0.339651	8.06	69	0.0112007	0.560036
02-BUFFER	Almegíjar	18016																			99.9636	99.9815	0.162291	1.98683	27.0699	0.999636	1.00182	0.00954654	0.993416	0.270699	-34.4977	-1.36993	1088.98	87.7942	12410	65.55	100	0.113246	0.310227	9.359	0.682812	1	129.306	0.265636	0.106574	28.46	-4	0.552486	0
02-BUFFER	Alquife	18018																			99.8544	99.9972	0.817075	1.59147	100	0.998544	1.00198	0.0480632	0.795735	1	-23.1136	-1.08896	1404.3	42.3366	2393.69	69.77	55.4298	0.146038	0.149599	1.8052	0.726771	0.554298	-32.3619	-0.254279	0.218131	17.06	41	3.00752	3.00752
02-BUFFER	Armilla	18021																			99.2365	sin dato	0	1.25222	100	0.992365	sin dato	0	0.626112	1	-34.5381	-1.37093	0	0	88.6112	79.91	29.5109	0	0	0.066826	0.832396	0.295109	-76.1134	-0.394981	0.0158451	2.36	76	0.0832362	0.624272
02-BUFFER	Baza	18023																			99.975	99.9809	61.2495	1.98107	93.9234	0.99975	1.00181	3.60291	0.990535	0.939234	50.6849	0.732526	2795.33	71.1976	1203.32	83.06	16.7573	0.290696	0.251582	0.907481	0.865208	0.167573	-50.3492	-0.312125	0.191762	5.89	62	0.595872	1.06579
02-BUFFER	Beas de Granada	18024																			99.951	99.9843	54.7589	1.97368	57.1997	0.99951	1.00185	3.22111	0.986841	0.571997	35.6261	0.360848	2621.08	48.2279	20.8731	87.04	100	0.272575	0.170417	0.0157414	0.906667	1	-52.692	-0.319659	0.189262	4.66	60	0.1	2
02-BUFFER	Beas de Guadix	18025																			100	99.9748	0	1.9951	69.5198	1	1.00175	0	0.997552	0.695198	-26.11	-1.16291	1673.01	38.1612	1907.16	46.3	100	0.173982	0.134845	1.43828	0.482292	1	-35.412	-0.264087	0.137792	19.34	37	0.289855	2.89855
01-SIZ	Bérchules	18030	Sierra Nevada NP	Bérchules	ES.IGN.SIGLIM.34011818030	4	34011818030	ES6	ES61	ES614	6953.05										100	99.975	95.3802	1.99565	100	1	1.00175	5.6106	0.997825	1	92.2036	1.75728	3631.82	254.795	1127.14	68.09	66.1376	0.377685	0.900336	0.850027	0.709271	0.661376	-30.0261	-0.246767	0.097282	47.72	47	0.13986	2.7972
01-SIZ	Bubión	18032	Sierra Nevada NP	Bubión	ES.IGN.SIGLIM.34011818032	4	34011818032	ES6	ES61	ES614	1485.18										100	99.9989	100	1.9906	100	1	1.00199	5.88235	0.9953	1	97.5929	1.8903	3782.86	182.803	243.691	78.67	32.6983	0.393392	0.645947	0.183779	0.819479	0.326983	-52.6084	-0.31939	0.136775	30.8	68	0.332226	0
01-SIZ	Busquístar	18033	Sierra Nevada NP	Busquístar	ES.IGN.SIGLIM.34011818033	4	34011818033	ES6	ES61	ES614	1801.73										99.9205	99.8093	93.3477	1.97052	100	0.999205	1.00009	5.49104	0.98526	1	89.512	1.69085	6120.87	125.883	1760.37	64.43	100	0.63653	0.444817	1.32758	0.671146	1	-18.3986	-0.209373	0.121069	23.04	56	0.359712	0
02-BUFFER	Cádiar	18035																			99.9791	99.533	1.61118	1.98913	39.1798	0.999791	0.997325	0.0947756	0.994564	0.391798	-30.4349	-1.26966	1181.1	53.9643	10187.8	55.9	23.7732	0.122826	0.190687	7.6831	0.582292	0.237732	76.3328	0.0952784	0.166563	23.59	35	0.0672948	2.69179
02-BUFFER	Cájar	18036																			99.7467	100	0.873571	1.24502	99.5108	0.997467	1.002	0.0513866	0.62251	0.995108	-26.6305	-1.17576	21.3395	2.03086	90.6975	86.57	100	0.00221917	0.0071762	0.0683993	0.901771	1	-60.4087	-0.344476	0.0470239	13.54	74	0.0395726	0.791452
01-SIZ	Cáñar	18040	Sierra Nevada NP	Cáñar	ES.IGN.SIGLIM.34011818040	4	34011818040	ES6	ES61	ES614	2632.54										100	99.9271	91.8633	1.99828	100	1	1.00127	5.40373	0.99914	1	88.0828	1.65557	2547.89	191.283	1735.22	55.86	100	0.264964	0.675913	1.30862	0.581875	1	-23.3727	-0.225369	0.113929	0.36	31	0.287356	0
01-SIZ	Capileira	18042	Sierra Nevada NP	Capileira	ES.IGN.SIGLIM.34011818042	4	34011818042	ES6	ES61	ES614	5685.01										99.9748	99.9957	100	1.99382	96.1611	0.999748	1.00196	5.88235	0.996908	0.961611	96.8516	1.87201	1300.06	342.808	276.127	81.22	100	0.135198	1.21134	0.208241	0.846042	1	-31.9837	-0.253062	0.0886946	14.91	60	0.178891	1.78891
02-BUFFER	Carataunas	18043																			100	99.9643	3.24773	1.97556	86.623	1	1.00165	0.191043	0.98778	0.86623	-19.066	-0.989053	1445.51	62.9058	17826.2	65.52	100	0.150323	0.222282	13.4436	0.6825	1	209.975	0.525064	0.177195	2.03	48	0.558659	0
02-BUFFER	Cástaras	18044																			100	99.9602	9.16718	1.99691	48.1597	1	1.00161	0.539246	0.998453	0.481597	-19.582	-1.00179	1780.89	338.991	10351.1	66.23	100	0.185201	1.19785	7.80623	0.689896	1	117.584	0.227939	0.0887	40.4	5	0.819672	0
02-BUFFER	Cenes de la Vega	18047																			99.7101	96.6136	0.176851	1.84049	92.0978	0.997101	0.968073	0.010403	0.920243	0.920978	-23.664	-1.10254	2045.76	52.0744	13.186	79.79	84.3702	0.212746	0.184009	0.00994423	0.831146	0.843702	-58.3691	-0.337916	0.387067	11.13	88	0.253261	0.379891
02-BUFFER	Cogollos de Guadix	18049																			99.8761	99.9967	47.1598	1.9568	100	0.998761	1.00197	2.7741	0.978399	1	35.0647	0.346991	1760.46	38.5332	2142.69	73.18	20.0317	0.183076	0.13616	1.61591	0.762292	0.200317	-42.045	-0.285419	0.139621	34.13	26	0.151745	1.51745
02-BUFFER	Cortes y Graena	18054																			99.932	99.9073	0	1.9473	23.5825	0.99932	1.00107	0	0.97365	0.235825	-35.8026	-1.40214	1366.49	51.6785	845.78	54	-4.30577	0.142106	0.18261	0.637843	0.5625	-0.0430577	-70.36	-0.376478	0.193954	29.06	42	0.402414	0
02-BUFFER	Cúllar Vega	18057																			99.4441	100	0	1.49955	98.7988	0.994441	1.002	0	0.749777	0.987988	-25.3158	-1.14331	163.06	0.270642	285.22	88.95	41.1592	0.0169571	0.000956333	0.215098	0.926563	0.411592	-68.5767	-0.370743	0.265005	10.36	82	0.0136426	1.09141
02-BUFFER	Churriana de la Vega	18062																			99.8128	sin dato	0	1.51273	100	0.998128	sin dato	0	0.756364	1	-31.1377	-1.287	0	0	130.209	83.3	75.4287	0	0	0.0981971	0.867708	0.754287	-65.5962	-0.361158	0.18061	4.84	77	0.1374	0.618302
01-SIZ	Dílar	18068	Sierra Nevada NP	Dílar	ES.IGN.SIGLIM.34011818068	4	34011818068	ES6	ES61	ES614	7921.91										99.9489	99.945	76.9504	1.97489	66.2966	0.999489	1.00145	4.52649	0.987443	0.662966	63.5568	1.05023	2918.92	83.7095	322.955	81.69	91.8789	0.303548	0.295793	0.243556	0.850938	0.918789	-47.7475	-0.303758	0.136988	0.38	55	0.0510465	2.04186
01-SIZ	Dólar	18069	Sierra Nevada NP	Dólar	ES.IGN.SIGLIM.34011818069	4	34011818069	ES6	ES61	ES614	7852.43										99.9921	100	50.3271	1.98835	91.1261	0.999921	1.002	2.96042	0.994177	0.911261	37.3557	0.403537	2934.32	50.3249	2173.51	68.75	98.1188	0.30515	0.177827	1.63914	0.716146	0.981188	-23.6109	-0.226136	0.0799014	15.31	13	0.15674	0
02-BUFFER	Dúdar	18070																			100	99.8498	0	1.97658	3.45599	1	1.0005	0	0.988292	0.0345599	-39.533	-1.49422	1260.73	31.9881	14.5167	68.91	64.1946	0.131107	0.113032	0.0109477	0.717812	0.641946	-67.7031	-0.367934	0.176897	26.97	60	0.309598	0
01-SIZ	Dúrcal	18071	Sierra Nevada NP	Dúrcal	ES.IGN.SIGLIM.34011818071	4	34011818071	ES6	ES61	ES614	7657.66										99.8763	99.9506	78.6946	1.96525	96.5355	0.998763	1.00151	4.62909	0.982623	0.965355	71.5469	1.24744	2617.04	336.154	359.07	83.16	42.2258	0.272155	1.18782	0.270792	0.86625	0.422258	-39.6144	-0.277602	0.276606	11.84	61	0.284576	0.853728
01-SIZ	Ferreira	18074	Sierra Nevada NP	Ferreira	ES.IGN.SIGLIM.34011818074	4	34011818074	ES6	ES61	ES614	4354.57										100	99.9998	40.9891	1.98604	94.3614	1	1.002	2.41112	0.993018	0.943614	26.9951	0.14782	2839.19	51.1374	2477.78	83.33	100	0.295257	0.180698	1.86861	0.868021	1	-15.7483	-0.20085	0.0805815	39.23	23	0.327869	3.27869
02-BUFFER	Gójar	18084																			99.7492	99.9733	7.68142	1.79398	31.8331	0.997492	1.00174	0.451848	0.896992	0.318331	-26.672	-1.17678	927.049	13.5184	956.862	83.99	46.6333	0.096407	0.0477681	0.721616	0.874896	0.466333	-55.8596	-0.329846	0.487936	21.58	78	0.017838	0.535141
02-BUFFER	Gor	18085																			99.9963	99.9851	46.2025	1.98465	60.3121	0.999963	1.00185	2.71779	0.992323	0.603121	26.3011	0.13069	1180.55	59.4162	1693.49	69.33	96.7733	0.12277	0.209951	1.27714	0.722187	0.967733	-34.0043	-0.25956	0.0632036	6.3	4	0.536193	1.34048
02-BUFFER	Granada	18087																			99.6594	99.0127	5.51662	1.67069	91.5901	0.996594	0.992111	0.324507	0.835346	0.915901	-18.7108	-0.980286	1933.82	25.7436	77.6112	80.17	-2.67232	0.201104	0.0909667	0.0585303	0.835104	-0.0267232	-76.8204	-0.397255	0.232295	11.22	63	0.491472	0.945139
02-BUFFER	Guadix	18089																			99.9425	99.9594	0.018181	1.96692	66.0233	0.999425	1.0016	0.00106947	0.983462	0.660233	-27.0843	-1.18696	494.491	34.9453	3892.71	77.56	61.2165	0.0514237	0.123482	2.93568	0.807917	0.612165	-9.38669	-0.180391	0.228028	12.45	59	0.675568	1.22347
01-SIZ	Güejar Sierra	18094	Sierra Nevada NP	Güejar Sierra	ES.IGN.SIGLIM.34011818094	4	34011818094	ES6	ES61	ES614	23876.3										99.997	99.9569	52.2067	1.99553	42.6522	0.99997	1.00157	3.07098	0.997764	0.426522	29.9362	0.22041	1487.26	295.181	158.909	88.72	78.7782	0.154665	1.04304	0.119841	0.924167	0.787782	-39.41	-0.276945	0.102075	0.07	63	0.0347464	0.694927
01-SIZ	Huéneja	18097	Sierra Nevada NP	Huéneja	ES.IGN.SIGLIM.34011818097	4	34011818097	ES6	ES61	ES614	11664.8										99.9942	99.9856	21.8784	1.99502	87.3164	0.999942	1.00186	1.28696	0.99751	0.873164	3.18881	-0.439764	2127.46	55.2656	3092.14	67.35	100	0.221242	0.195285	2.33193	0.701562	1	-10.9996	-0.185578	0.092964	11.87	34	0.17301	0.865052
02-BUFFER	Huétor Vega	18101																			99.8231	100	0	1.43034	87.2555	0.998231	1.002	0	0.715172	0.872555	-28.2408	-1.2155	64.1445	2.14218	71.6896	82.24	99.8022	0.00667061	0.00756954	0.0540645	0.856667	0.998022	-61.5401	-0.348114	0.0599428	8	78	0.168011	0.756048
01-SIZ	Jerez del Marquesado	18108	Sierra Nevada NP	Jerez del Marquesado	ES.IGN.SIGLIM.34011818108	4	34011818108	ES6	ES61	ES614	8268.61										99.9884	99.9974	82.8628	1.99414	74.0759	0.999884	1.00198	4.87428	0.997072	0.740759	72.2795	1.26552	3851.19	78.8897	895.381	73.29	86.3198	0.400498	0.278762	0.675249	0.763437	0.863198	-40.3771	-0.280055	0.101851	40.21	25	0.0998004	0.998004
01-SIZ	Juviles	18112	Sierra Nevada NP	Juviles	ES.IGN.SIGLIM.34011818112	4	34011818112	ES6	ES61	ES614	1497.28										100	99.9961	80.0505	1.99418	100	1	1.00196	4.70885	0.997092	1	74.1582	1.31189	2806.21	1887.18	4168.48	67.8	100	0.291828	6.66847	3.14365	0.70625	1	136.204	0.287821	0.0920733	52.98	26	0.694444	0
02-BUFFER	La Calahorra	18114																			99.6714	100	4.31423	1.93753	98.258	0.996714	1.002	0.253778	0.968763	0.98258	-15.9232	-0.911483	261.477	7.57085	4061.48	86.3	77.1975	0.0271919	0.0267521	3.06296	0.898958	0.771975	-4.24327	-0.16385	0.125106	43.99	31	0.148588	1.48588
01-SIZ	Lanjarón	18116	Sierra Nevada NP	Lanjarón	ES.IGN.SIGLIM.34011818116	4	34011818116	ES6	ES61	ES614	6033.48										99.9532	98.3462	52.9253	1.9751	71.7964	0.999532	0.985433	3.11326	0.987552	0.717964	36.0747	0.371921	1831.36	653.16	8209.77	80.59	5.34733	0.190449	2.30799	6.19138	0.839479	0.0534733	91.6554	0.144555	0.225651	26.31	47	0.028547	1.14188
01-SIZ	Lanteira	18117	Sierra Nevada NP	Lanteira	ES.IGN.SIGLIM.34011818117	4	34011818117	ES6	ES61	ES614	5273.63										99.948	99.9997	73.048	1.97216	79.8205	0.99948	1.002	4.29694	0.986082	0.798205	61.6541	1.00327	3315.49	78.699	1139.85	62.84	88.0844	0.344789	0.278088	0.859619	0.654583	0.880844	-39.6415	-0.277689	0.0956867	28.27	31	0.178891	1.78891
01-SIZ	Lecrín	18119	Sierra Nevada NP	Lecrín	ES.IGN.SIGLIM.34011818119	4	34011818119	ES6	ES61	ES614	4045.76										99.9067	97.4689	59.1049	1.95202	94.9644	0.999067	0.976642	3.47676	0.976008	0.949644	47.5624	0.655457	3927.05	89.0166	287.454	73.81	100	0.408387	0.314546	0.216783	0.768854	1	-45.8286	-0.297587	0.211634	18.2	35	0.239349	0
02-BUFFER	Lobras	18121																			100	99.7521	0	1.99819	14.1826	1	0.99952	0	0.999096	0.141826	-37.1911	-1.43641	1219.06	68.9068	10511.7	96.87	100	0.126775	0.243487	7.92739	1.00906	1	106.134	0.191118	0.0872241	34.92	1	1.35135	6.75676
01-SIZ	Lugros	18123	Sierra Nevada NP	Lugros	ES.IGN.SIGLIM.34011818123	4	34011818123	ES6	ES61	ES614	6323.36										100	100	86.541	1.99822	94.2167	1	1.002	5.09065	0.99911	0.942167	80.6786	1.47283	2819.88	101.148	181.503	47.95	73.4682	0.293249	0.357414	0.13688	0.499479	0.734682	-59.5659	-0.341765	0.0660544	9.62	29	0.299401	0
02-BUFFER	Marchal	18128																			99.9978	99.9998	0.666764	1.98357	76.1939	0.999978	1.002	0.0392214	0.991784	0.761939	-24.1015	-1.11334	1383.6	35.4005	2575.69	61.72	100	0.143885	0.12509	1.94245	0.642917	1	-22.9132	-0.223892	0.21137	1.46	18	0.239808	0
01-SIZ	Monachil	18134	Sierra Nevada NP	Monachil	ES.IGN.SIGLIM.34011818134	4	34011818134	ES6	ES61	ES614	8884.97										99.9763	99.9591	82.1206	1.96497	64.281	0.999763	1.00159	4.83062	0.982487	0.64281	69.1455	1.18817	3875.7	100.597	197.581	81.01	41.513	0.403047	0.355465	0.149006	0.843854	0.41513	-56.67	-0.332452	0.261397	37.44	74	0.0388853	0.518471
02-BUFFER	Murtas	18141																			100	99.8124	0	1.9919	8.44248	1	1.00012	0	0.99595	0.0844248	-38.39	-1.46601	1847.79	60.4777	467.558	53.55	95.5799	0.192157	0.213702	0.352608	0.557812	0.955799	-54.5584	-0.325661	0.0832749	0	32	0.422833	4.22833
01-SIZ	Nigüelas	18143	Sierra Nevada NP	Nigüelas	ES.IGN.SIGLIM.34011818143	4	34011818143	ES6	ES61	ES614	3090.18										99.8224	97.8111	80.9564	1.96863	99.5258	0.998224	0.980071	4.76214	0.984315	0.995258	74.4002	1.31786	2750.64	943.023	153.415	68.39	99.8167	0.286048	3.33224	0.115697	0.712396	0.998167	8.89087	-0.121612	0.175672	14.8	30	0.083682	1.67364
02-BUFFER	Ogíjares	18145																			99.1062	sin dato	0	1.28246	100	0.991062	sin dato	0	0.641228	1	-34.1927	-1.36241	0	0	304.203	84.87	65.475	0	0	0.229414	0.884063	0.65475	-64.6355	-0.358069	0.188985	23.22	84	0.00722126	0.866551
02-BUFFER	Órgiva	18147																			99.9809	99.9308	0.185024	1.98839	74.4286	0.999809	1.00131	0.0108838	0.994196	0.744286	-24.9903	-1.13528	2107.63	109.243	5596.83	71.4	73.8809	0.21918	0.386018	4.22084	0.74375	0.738809	26.1719	-0.0660367	0.185284	12.46	52	0.394973	0.897666
02-BUFFER	Villa de Otura	18149																			99.6349	99.9972	0	1.75544	52.3442	0.996349	1.00198	0	0.877721	0.523442	-32.0103	-1.30854	152.202	7.93377	1181.31	81.41	-66.5298	0.015828	0.0280345	0.890885	0.848021	-0.665298	-77.6506	-0.399925	0.436002	28.87	75	0.014637	0.43911
02-BUFFER	Padul	18150																			99.8436	99.9364	15.7096	1.92098	97.3784	0.998436	1.00137	0.924092	0.960491	0.973784	-2.83663	-0.588482	1268.09	78.6702	714.439	64.29	86.0348	0.131872	0.277987	0.538793	0.669687	0.860348	-50.4262	-0.312372	0.277671	20.36	65	0.0118287	0.709723
01-SIZ	Pampaneira	18151	Sierra Nevada NP	Pampaneira	ES.IGN.SIGLIM.34011818151	4	34011818151	ES6	ES61	ES614	1745.79										100	99.9671	99.6846	1.99686	92.7289	1	1.00167	5.8638	0.998429	0.927289	95.8239	1.84664	6037.9	225.617	698.424	72.58	30.2905	0.627901	0.797233	0.526715	0.756042	0.302905	-39.7841	-0.278148	0.128481	0.83	61	0.308642	3.08642
02-BUFFER	La Peza	18154																			99.9856	99.9893	7.09037	1.99251	85.7064	0.999856	1.0019	0.417081	0.996256	0.857064	-14.5569	-0.877761	2728.97	64.6264	693.944	49.58	92.9861	0.283795	0.228362	0.523336	0.516458	0.929861	-50.3638	-0.312172	0.102064	8.71	46	0.164745	0.823723
02-BUFFER	Pinos Genil	18157																			99.9225	97.082	0.00870725	1.92758	18.3531	0.999225	0.972766	0.000512191	0.963791	0.183531	-37.6035	-1.44659	1935.64	42.0634	14.4148	88.85	88.3924	0.201294	0.148634	0.0108709	0.925521	0.883924	-56.5951	-0.332211	0.277966	29.8	79	0.0703235	0.703235
02-BUFFER	Polícar	18161																			100	100	0	1.97394	100	1	1.002	0	0.98697	1	-20.2205	-1.01755	573	19.9794	14.7477	66.36	94.5868	0.0595882	0.0705987	0.0111219	0.69125	0.945868	-64.4315	-0.357413	0.184467	24.37	33	0.438596	0
01-SIZ	Pórtugos	18163	Sierra Nevada NP	Pórtugos	ES.IGN.SIGLIM.34011818163	4	34011818163	ES6	ES61	ES614	2081.13										100	99.9995	87.382	1.99638	99.6787	1	1.002	5.14012	0.998192	0.996787	82.7419	1.52375	3594.82	225.375	2561.75	68.28	82.6726	0.373838	0.796379	1.93194	0.71125	0.826726	-7.19743	-0.173351	0.122004	18.55	42	0.248139	2.48139
02-BUFFER	Quéntar	18168																			99.9723	99.9721	45.2084	1.99094	73.327	0.999723	1.00172	2.65932	0.99547	0.73327	27.7901	0.167441	2818.34	69.0367	14.9747	86.8	81.054	0.293089	0.243946	0.0112932	0.904167	0.81054	-54.7393	-0.326243	0.111382	0	58	0.107759	1.07759
01-SIZ	Soportújar	18176	Sierra Nevada NP	Soportújar	ES.IGN.SIGLIM.34011818176	4	34011818176	ES6	ES61	ES614	1415.05										100	99.9939	70.1089	2	100	1	1.00194	4.12405	1	1	62.5199	1.02464	5423.54	375.562	5187.27	62.16	97.9575	0.564012	1.32707	3.91197	0.6475	0.979575	48.6026	0.00609925	0.125689	0	33	0.37594	0
02-BUFFER	Torvizcón	18179																			100	99.8492	0	1.99838	29.4664	1	1.00049	0	0.999191	0.294664	-34.113	-1.36044	2269.5	56.9385	926.785	36.66	100	0.236013	0.201196	0.698933	0.381875	1	-49.6397	-0.309843	0.107495	14.59	30	0.153846	3.07692
01-SIZ	Trevélez	18180	Sierra Nevada NP	Trevélez	ES.IGN.SIGLIM.34011818180	4	34011818180	ES6	ES61	ES614	9088.85										99.9825	99.9971	100	1.99631	99.9349	0.999825	1.00198	5.88235	0.998154	0.999349	97.6331	1.89129	1380.5	450.441	300.975	75.52	91.5219	0.143563	1.59167	0.22698	0.786667	0.915219	-26.7181	-0.236128	0.0847943	2.95	53	0.131926	2.63852
02-BUFFER	Ugíjar	18182																			99.9867	99.919	0	1.9867	30.9033	0.999867	1.00119	0	0.993349	0.309033	-33.9312	-1.35595	1131.4	44.3799	10757.7	68.25	41.7943	0.117659	0.156819	8.11293	0.710938	0.417943	90.3258	0.140279	0.179488	17.07	43	0.876145	1.99124
01-SIZ	Válor	18183	Sierra Nevada NP	Válor	ES.IGN.SIGLIM.34011818183	4	34011818183	ES6	ES61	ES614	5851.81										100	99.8626	80.3193	1.99322	84.239	1	1.00063	4.72466	0.99661	0.84239	71.2858	1.24099	1850.03	131.697	3969.14	51.06	83.3894	0.192391	0.46536	2.99332	0.531875	0.833894	0.33674	-0.149121	0.0999751	55.97	14	0.443787	1.47929
02-BUFFER	Vélez de Benaudalla	18184																			99.7392	99.9377	0	1.94519	52.2809	0.997392	1.00138	0	0.972593	0.522809	-30.1165	-1.2618	1753.11	81.5774	240.1	76.34	82.0649	0.182312	0.288259	0.181071	0.795208	0.820649	-54.65	-0.325956	0.172195	35.97	55	0.034662	1.03986
01-SIZ	La Zubia	18193	Sierra Nevada NP	La Zubia	ES.IGN.SIGLIM.34011818193	4	34011818193	ES6	ES61	ES614	2009.45										99.664	99.994	57.0787	1.71315	71.3278	0.99664	1.00194	3.35757	0.856576	0.713278	38.5202	0.43228	1292.61	26.4848	175.896	87.4	84.8335	0.134423	0.093586	0.132652	0.910417	0.848335	-57.6118	-0.335481	0.475075	9.2	79	0.10523	0.63138
01-SIZ	La Taha	18901	Sierra Nevada NP	La Taha	ES.IGN.SIGLIM.34011818901	4	34011818901	ES6	ES61	ES614	2556.72										100	99.9758	25.3206	1.99406	78.6745	1	1.00176	1.48945	0.997032	0.786745	5.49976	-0.382725	3907.4	244.73	13495	62.59	-140.202	0.406343	0.864769	10.1773	0.651979	-1.40202	113.966	0.216306	0.154567	33.76	43	0.459418	0
02-BUFFER	El Valle	18902																			100	99.7391	0	1.99477	54.2506	1	0.99939	0	0.997386	0.542506	-29.2144	-1.23953	2662.62	36.3295	436.944	44.59	37.2025	0.276895	0.128373	0.329521	0.464479	0.372025	-68.5742	-0.370735	0.18781	0.12	27	0.319829	0
[truncated: 344 more rows]
[truncated: 8 more columns]

## Sheet: 03_Teide_NP
																					SASMU (ENSI)												SASMU (ECSI)												SASMU (SOSI)
[truncated: 569 more rows]
[truncated: 8 more columns]

[truncated: 12 more sheets: 04-Caldera-Taburiente_NP, 05-Aigüestortes_NP, 06-Doñana_NP, 07-TDaimiel_NP, 08-Timanfaya_NP, 09-Garajonay_NP, 10-Cabrera_NP, 11-Cabañeros_NP, 12-Sierra-Nevada_NP, 13-Islas-Atlanticas_NP, 14-Monfragüe_NP, 15-Sierra-Guadarrama_NP]
